# Supplementary material for: TBX21 Methylation as a Potential Regulator of Immune Suppression in CMS1 Subtype Colorectal Cancer
Source: Cancers (Basel). 2022 Sep 22;14(19):4594. doi: 10.3390/cancers14194594 (PMC9558549; doi:10.3390/cancers14194594)
Supplement: Supplementary file 1 [file cancers-14-04594-s001.zip › cancers-1768880_SupplementaryFiles/cancers-1768880_SupplementaryTables.xlsx]

## Sheet: TableS1
TBX21 is DEG in 4/10 microarray dataset (validation)								TCGA_DMR_TBX21_CMS1vsCMS2												DMR_TBX21_CMS1vsCMS2
Dataset	logFC	AveExpr	t	P.Value	adj.P.Val	B		SiteID	Chr	Loc		Gene	Island	CMS1.avg.beta	CMS2.avg.beta	CMS1.vs.CMS2.delta.beta	CMS1.vs.CMS2.pvalue	CMS1.vs.CMS2.fdr		SiteID	Chr	Loc	Gene	Island	CMS2.avg.beta	CMS1.avg.beta	CMS2.vs.CMS1.delta.beta	CMS2.vs.CMS1.pvalue	CMS2.vs.CMS1.fdr
gse13067								cg08670136	17	45810379	CTCF	TBX21	chr17:45810589-45811388	0.522192	0.311076	0.211116	1.24e-11	3.21e-10		cg26281453	17	45810610	TBX21	chr17:45810589-45811388	0.134678	0.474583	-0.339905	1.2891e-08	1.3465e-06
CMS1vsCMS2	-0.177167	5.20972	-2.69031	0.0101044	0.0736908	-3.10021		cg03396557	17	45810410	CTCF	TBX21	chr17:45810589-45811388	0.523454	0.24222	0.281234	2.79e-11	6.65e-10		cg02731774	17	45810615	TBX21	chr17:45810589-45811388	0.15333	0.466148	-0.312818	4.0049e-09	6.1383e-07
CMS1vsCMS3	-0.227152	5.23419	-2.04451	0.0529481	0.287214	-4.28097					promotor									cg09775582	17	45810865	TBX21	chr17:45810589-45811388	0.181847	0.494834	-0.312987	1.7355e-09	3.6131e-07
CMS1vsCMS4	-0.0885291	5.28977	-0.971351	0.340279	0.667172	-5.6882		cg26607785	17	45810424	CTCF	TBX21	chr17:45810589-45811388	0.584044	0.288861	0.295183	4.38e-15	2.82e-13
											promotor
gse13294								cg19172222	17	45810426	CTCF	TBX21	chr17:45810589-45811388	0.596707	0.324934	0.271772	1.28e-14	7.28e-13		TCGA_DMR_TBX21_CMS1vsCMS3
CMS1vsCMS2	-0.305521	3.83282	-3.8898	0.00019031	0.00111011	0.151253					promotor									SiteID	Chr	Loc	Gene	Island	CMS3.avg.beta	CMS1.avg.beta	CMS3.vs.CMS1.delta.beta	CMS3.vs.CMS1.pvalue	CMS3.vs.CMS1.fdr
CMS1vsCMS3	-0.315652	3.90772	-2.63153	0.010902	0.0683796	-3.11453		cg06959103	17	45810436	CTCF	TBX21	chr17:45810589-45811388	0.463248	0.179792	0.283455	7.86e-15	4.73e-13		cg26281453	17	45810610	TBX21	chr17:45810589-45811388	0.301292	0.474583	-0.173291	0.00340439	0.0203021
CMS1vsCMS4	-0.235088	3.90329	-2.32752	0.0228255	0.0976893	-3.90758					promotor
								cg11090676	17	45810512	CTCF	TBX21	chr17:45810589-45811388	0.150904	0.036749	0.114154	4.92e-05	0.000263
gse14333											promotor									TCGA_DMR_TBX21_CMS1vsCMS4
CMS1vsCMS2	-0.138845	6.04147	-2.50653	0.0142708	0.0581673	-3.60086		cg26281453	17	45810610	coding	TBX21	chr17:45810589-45811388	0.597327	0.114785	0.482543	1.01e-16	1.03e-14		SiteID	Chr	Loc	Gene	Island	CMS4.avg.beta	CMS1.avg.beta	CMS4.vs.CMS1.delta.beta	CMS4.vs.CMS1.pvalue	CMS4.vs.CMS1.fdr
CMS1vsCMS3	-0.114815	6.08196	-1.49741	0.141132	0.420374	-5.117		cg02731774	17	45810615	coding	TBX21	chr17:45810589-45811388	0.522544	0.127272	0.395273	2.74e-16	2.47e-14		cg26281453	17	45810610	TBX21	chr17:45810589-45811388	0.185425	0.474583	-0.289158	1.099e-06	6.6381e-05
CMS1vsCMS4	0.0247825	6.15586	0.420551	0.675642	0.787128	-6.47114		cg09775582	17	45810865	coding	TBX21	chr17:45810589-45811388	0.623807	0.181087	0.442721	6.26e-18	8.94e-16		cg02731774	17	45810615	TBX21	chr17:45810589-45811388	0.195248	0.466148	-0.2709	2.4599e-07	2.6561e-05
											CTCF
GSE17536											promotor
CMS1vsCMS2	-0.0774202	7.33597	-2.27007	0.025424	0.0674164	-4.36132		cg20568196	17	45811015	coding	TBX21	chr17:45810589-45811388	0.582451	0.268187	0.314264	1.8e-12	5.75e-11
CMS1vsCMS3	-0.106304	7.3467	-1.94719	0.0569609	0.224077	-4.58266					promotor
CMS1vsCMS4	-0.0764183	7.34534	-1.98373	0.0511208	0.128054	-4.63345		cg03639783	17	45811239	coding	TBX21	chr17:45810589-45811388	0.52416	0.198329	0.325831	6.63e-13	2.36e-11
											promotor
gse20916								cg20209009	17	45811322	Intron 1-2	TBX21	chr17:45810589-45811388	0.5992	0.420265	0.178935	1.59e-09	2.52e-08
CMS1vsCMS2	-0.174598	4.83034	-1.60857	0.118352	0.531576	-4.87282					promotor
CMS1vsCMS3	-0.176371	4.83477	-1.36586	0.18346	0.488253	-5.46346		cg16928046	17	45812243	Intron 1-2	TBX21	chr17:45810589-45811388	0.715994	0.706793	0.009201	0.690757	0.76735
CMS1vsCMS4	-0.151002	4.84905	-1.22662	0.229605	0.803393	-5.10085		cg05266212	17	45822969	coding	TBX21		0.555321	0.398614	0.156707	3.79e-08	4.32e-07
GSE33113											ENSE00001043177
CMS1vsCMS2	-0.16814	0.894943	-0.723141	0.472495	0.682784	-6.13925
CMS1vsCMS3	-0.156949	0.947745	-0.4802	0.63419	0.854836	-5.7876		TCGA_DMR_TBX21_CMS1vsCMS3
CMS1vsCMS4	-0.0745822	0.961507	-0.289072	0.773863	0.892576	-6.13989		SiteID	Chr	Loc		Gene	Island	CMS1.avg.beta	CMS3.avg.beta	CMS1.vs.CMS3.delta.beta	CMS1.vs.CMS3.pvalue	CMS1.vs.CMS3.fdr
								cg26281453	17	45810610	coding	TBX21	chr17:45810589-45811388	0.597327	0.316638	0.28069	6.92e-06	0.000151
GSE37892
CMS1vsCMS2	-0.213644	2.33946	-3.75549	0.0004001	0.0131927	-0.13669
CMS1vsCMS3	-0.221468	2.37367	-2.56194	0.0159627	0.317021	-3.28381		TCGA_DMR_TBX21_CMS1vsCMS4
CMS1vsCMS4	-0.190218	2.36557	-2.4543	0.0177498	0.138045	-3.56244		SiteID	Chr	Loc		Gene	Island	CMS1.avg.beta	CMS4.avg.beta	CMS1.vs.CMS4.delta.beta	CMS1.vs.CMS4.pvalue	CMS1.vs.CMS4.fdr
								cg03396557	17	45810410	CTCF	TBX21	chr17:45810589-45811388	0.523454	0.240716	0.282738	2.1007e-11	6.6639e-10
GSE39582											promotor
CMS1vsCMS2	-0.243631	4.6704	-6.46405	3.75e-10	2.92e-09	12.323		cg26607785	17	45810424	CTCF	TBX21	chr17:45810589-45811388	0.584044	0.294374	0.28967	8.099e-15	7.6645e-13
CMS1vsCMS3	-0.275836	4.72644	-4.99729	1.51e-06	1.59e-05	4.65804					promotor
CMS1vsCMS4	-0.200839	4.72839	-4.38968	1.77e-05	8.56e-05	2.15076		cg19172222	17	45810426	CTCF	TBX21	chr17:45810589-45811388	0.596707	0.32981	0.266897	2.0586e-14	1.6808e-12
											promotor
KFSYSCC								cg06959103	17	45810436	CTCF	TBX21	chr17:45810589-45811388	0.463248	0.190744	0.272504	5.4638e-14	3.8244e-12
CMS1vsCMS2	-0.125959	5.79176	-2.93306	0.00392108	0.0168542	-2.6153					promotor
CMS1vsCMS3	-0.159825	5.79159	-2.93697	0.00433648	0.0226952	-2.49926		cg26281453	17	45810610	coding	TBX21	chr17:45810589-45811388	0.597327	0.150751	0.446577	2.5226e-15	2.8681e-13
CMS1vsCMS4	-0.0326646	5.86658	-0.49252	0.623289	0.726756	-6.74715		cg02731774	17	45810615	coding	TBX21	chr17:45810589-45811388	0.522544	0.159644	0.3629	8.0387e-15	7.6222e-13
								cg09775582	17	45810865	coding	TBX21	chr17:45810589-45811388	0.623807	0.243943	0.379865	4.2586e-14	3.1076e-12
E-MTAB-8148											CTCF
CMS1vsCMS2	-0.198907	3.15542	-1.68796	0.0943971	0.289502	-5.27437					promotor
CMS1vsCMS3	-0.0376654	3.30978	-0.28442	0.776748	0.912025	-6.50289		cg20568196	17	45811015	coding	TBX21	chr17:45810589-45811388	0.582451	0.256954	0.325498	4.0788e-13	2.1345e-11
CMS1vsCMS4	-0.184032	3.17064	-1.4575	0.148237	0.389255	-5.50185					promotor
								cg03639783	17	45811239	coding	TBX21	chr17:45810589-45811388	0.52416	0.196141	0.328019	4.5612e-13	2.3501e-11
											promotor

## Sheet: TableS2
CMS1 vs. CMS2 DMR											CMS1 vs. CMS3 DMR											CMS1 vs. CMS4 DMR											CMS2 vs. CMS1 DEGs						CMS3 vs. CMS1 DEGs						CMS4 vs. CMS1 DEGs
SiteID	Chr	Loc	Gene	Island	CMS1.avg.beta	CMS2.avg.beta	CMS1.vs.CMS2.delta.beta	CMS1.vs.CMS2.pvalue	CMS1.vs.CMS2.fdr		SiteID	Chr	Loc	Gene	Island	CMS1.avg.beta	CMS3.avg.beta	CMS1.vs.CMS3.delta.beta	CMS1.vs.CMS3.pvalue	CMS1.vs.CMS3.fdr		SiteID	Chr	Loc	Gene	Island	CMS1.avg.beta	CMS4.avg.beta	CMS1.vs.CMS4.delta.beta	CMS1.vs.CMS4.pvalue	CMS1.vs.CMS4.fdr		GeneID	logFC	logCPM	PValue	FDR		GeneID	logFC	EntrzID	logFC	FDR		GeneID	logFC	logCPM	PValue	FDR
cg22699361	1	854918	FLJ39609	chr1:854765-854973	0.591873	0.338519	0.253354	3.52504e-11	8.20093e-10		cg03735847	1	860925	SAMD11	chr1:858970-861632	0.421228	0.108566	0.312663	3.69725e-09	4.41137e-07		cg03735847	1	860925	SAMD11	chr1:858970-861632	0.421228	0.0462816	0.374947	1.31537e-12	5.85762e-11		MARCH1|55016	1.03068	0.782489	8.33973e-23	1.07914e-21		SEPT3|55964	2.16314	1.62715	-1.00635	2.17e-15		MARCH4|57574	-1.14941	-0.437969	2.29e-06	7.55e-06
cg03735847	1	860925	SAMD11	chr1:858970-861632	0.421228	0.0297635	0.391465	4.06802e-13	1.53487e-11		cg03180780	1	860965	SAMD11	chr1:858970-861632	0.462942	0.125352	0.33759	1.81684e-08	1.46333e-06		cg03180780	1	860965	SAMD11	chr1:858970-861632	0.462942	0.0586329	0.404309	2.82966e-11	8.66617e-10		DEC1|50514	-2.68222	-3.24785	8.01326e-12	4.26054e-11		KIAA1618|57714	1.05075	4.74619	1.66664	1.55e-09		EZHIP|340602	-4.94146	-2.41748	3.2e-13	2.6e-12
cg03180780	1	860965	SAMD11	chr1:858970-861632	0.462942	0.0393346	0.423607	8.31982e-12	2.24595e-10		cg22348654	1	916058	C1orf170	chr1:919726-919927	0.81863	0.566398	0.252232	5.30071e-08	3.33384e-06		cg05527507	1	861265	SAMD11	chr1:858970-861632	0.419753	0.152992	0.26676	8.87139e-10	1.88479e-08		EFCAB12|90288	1.38733	-2.3382	1.8638e-15	1.40111e-14		TMPRSS11E2|729884	2.41609	-0.367911	2.02931	0.00026033		REXO1L6P|441362	-8.43868	1.36261	8.74e-11	5.27e-10
cg05527507	1	861265	SAMD11	chr1:858970-861632	0.419753	0.123547	0.296206	4.72294e-11	1.06828e-09		cg19236794	1	1181769	FAM132A	chr1:1181756-1182470	0.579482	0.308678	0.270804	1.66059e-08	1.36456e-06		cg25594899	1	1182226	FAM132A	chr1:1181756-1182470	0.413589	0.0935331	0.320056	1.17561e-11	3.98358e-10		EFCAB8|388795	-1.61508	-2.10621	3.06082e-07	1.01237e-06		A1CF|29974	-1.40477	2.71302	1.94266	5.39e-10		UBE2Q2P3|100133144	1.06278	-0.111448	1.46e-09	7.52e-09
cg13856810	1	861886	SAMD11	chr1:858970-861632	0.533054	0.282557	0.250496	2.42595e-11	5.86685e-10		cg25594899	1	1182226	FAM132A	chr1:1181756-1182470	0.413589	0.0886018	0.324987	2.4561e-11	1.29089e-08		cg06443533	1	1182424	FAM132A	chr1:1181756-1182470	0.398467	0.110827	0.287639	4.6698e-08	6.77554e-07		EZHIP|340602	-3.16793	-3.26712	5.40539e-07	1.73544e-06		A2BP1|54715	-1.2003	-1.11608	1.36808	0.0433153		A1BG|1	-3.48099	3.53647	6.25e-21	1.31e-19
cg22348654	1	916058	C1orf170	chr1:919726-919927	0.81863	0.551555	0.267075	7.11196e-13	2.51237e-11		cg06443533	1	1182424	FAM132A	chr1:1181756-1182470	0.398467	0.103633	0.294833	7.21798e-08	4.24817e-06		cg19436320	1	1290708	MXRA8	chr1:1289707-1291126	0.634249	0.359778	0.274471	2.36424e-13	1.33753e-11		REXO1L6P|441362	-2.77659	-2.87306	2.11313e-05	5.51738e-05		A2ML1|144568	5.63488	1.32978	1.55835	4.42e-11		A1CF|29974	-1.01735	2.65261	7.32e-08	2.96e-07
cg19236794	1	1181769	FAM132A	chr1:1181756-1182470	0.579482	0.284024	0.295458	2.24106e-11	5.46797e-10		cg21396988	1	1267201	TAS1R3	chr1:1267085-1267286	0.745359	0.489071	0.256288	2.55586e-10	6.19995e-08		cg03136646	1	1567257	MMP23A;MMP23B	chr1:1564421-1570006	0.661159	0.37428	0.286879	2.42546e-16	3.83465e-14		A1CF|29974	-1.6614	3.27428	5.98204e-31	1.37811e-29		A4GALT|53947	1.35794	3.03908	1.19826	1e-14		A2BP1|54715	-1.39292	-0.76204	0.00101186	0.00222439
cg25594899	1	1182226	FAM132A	chr1:1181756-1182470	0.413589	0.0457215	0.367867	1.66602e-13	6.98205e-12		cg03136646	1	1567257	MMP23A;MMP23B	chr1:1564421-1570006	0.661159	0.407632	0.253527	1.39777e-09	2.13174e-07		cg11798909	1	1567820	MMP23A;MMP23B	chr1:1564421-1570006	0.596616	0.280549	0.316067	5.23063e-19	2.47822e-16		A2ML1|144568	5.16159	0.484041	3.76399e-30	8.21543e-29		AACSL|729522	2.71889	-2.70402	1.61738	1.51e-05		A2M|2	-1.28266	8.72514	3.04e-27	1.46e-25
cg14089984	1	1182418	FAM132A	chr1:1181756-1182470	0.315325	0.056753	0.258572	2.57895e-09	3.87531e-08		cg05152432	1	1689887	NADK	chr1:1691767-1692063	0.818632	0.511984	0.306648	2.65485e-11	1.35174e-08		cg22344830	1	1935048	KIAA1751	chr1:1935166-1935452	0.404602	0.125629	0.278973	5.72894e-11	1.61182e-09		AAA1|404744	1.01321	-2.34795	0.000610833	0.00128622		AADAC|13	1.04318	-0.0177685	1.69088	0.0091749		AADAC|13	-1.15869	1.23772	0.00475966	0.00920606
cg06443533	1	1182424	FAM132A	chr1:1181756-1182470	0.398467	0.0567604	0.341706	4.99334e-10	8.88123e-09		cg26067203	1	1935289	KIAA1751	chr1:1935166-1935452	0.466618	0.205399	0.261219	2.44384e-06	6.63737e-05		cg26067203	1	1935289	KIAA1751	chr1:1935166-1935452	0.466618	0.0985369	0.368081	2.47107e-12	1.0159e-10		AACSL|729522	2.4672	-3.00761	5.24141e-13	3.14343e-12		AADACL4|343066	3.72438	-3.11046	1.58403	2.23e-06		AANAT|15	1.13817	-3.00455	3.14e-05	8.76e-05
cg09870910	1	1222942	SCNN1D		0.835507	0.536798	0.298709	1.20728e-12	4.01937e-11		cg09107007	1	1950616	GABRD	chr1:1950411-1951479	0.577709	0.304105	0.273604	8.54189e-08	4.83996e-06		cg08114317	1	1935535	KIAA1751	chr1:1935166-1935452	0.549755	0.293564	0.256191	6.58994e-14	4.49354e-12		AADAC|13	1.21412	-0.313282	3.37039e-06	9.78773e-06		AANAT|15	1.12334	-2.90343	1.09384	0.00117999		ABAT|18	-2.07203	4.70369	1.04e-29	7.51e-28
cg13246026	1	1267193	TAS1R3	chr1:1267085-1267286	0.628271	0.352131	0.27614	7.84203e-12	2.12794e-10		cg04314111	1	2003577	PRKCZ	chr1:2005179-2005565	0.637058	0.368915	0.268143	3.22942e-10	7.35335e-08		cg17854471	1	1950036	GABRD	chr1:1950411-1951479	0.635048	0.355956	0.279093	5.22621e-17	1.07938e-14		AANAT|15	1.31177	-3.08396	4.69328e-08	1.71322e-07		ABAT|18	-1.16927	3.7129	1.40807	3.28e-10		ABCA12|26154	2.09499	1.39324	1.07e-07	4.21e-07
cg21396988	1	1267201	TAS1R3	chr1:1267085-1267286	0.745359	0.457868	0.287491	2.03361e-13	8.32044e-12		cg22332339	1	2003605	PRKCZ	chr1:2005179-2005565	0.561637	0.284368	0.277269	8.28335e-09	8.0574e-07		cg22817993	1	1950415	GABRD	chr1:1950411-1951479	0.55433	0.272807	0.281523	8.93884e-16	1.18568e-13		ABAT|18	-2.46507	5.18758	6.47488e-58	9.47561e-56		ABCA13|154664	-1.91995	0.680642	1.55397	3.54e-10		ABCA13|154664	-1.15611	0.357391	1.94e-05	5.58e-05
cg06802641	1	1267252	TAS1R3	chr1:1267085-1267286	0.798829	0.5186	0.280229	1.10751e-11	2.90084e-10		cg08863830	1	2202028	SKI		0.822871	0.558183	0.264688	1.36341e-09	2.09239e-07		cg09107007	1	1950616	GABRD	chr1:1950411-1951479	0.577709	0.193499	0.38421	1.1977e-16	2.12883e-14		ABCA10|10349	1.0567	-0.654173	2.6537e-10	1.22174e-09		ABCA3|21	1.77426	4.27136	1.42003	2.07e-10		ABCA17P|650655	1.95393	-0.295468	1.41e-09	7.27e-09
cg19436320	1	1290708	MXRA8	chr1:1289707-1291126	0.634249	0.298787	0.335462	4.79163e-17	5.32299e-15		cg09811127	1	2284501	LOC100129534;MORN1		0.738956	0.477944	0.261011	5.0556e-11	2.09715e-08		cg25845463	1	2064046	PRKCZ	chr1:2063782-2064052	0.715673	0.461912	0.253761	7.01007e-12	2.53529e-10		ABCA12|26154	2.61016	0.99542	5.4754e-16	4.30841e-15		ABCA4|24	-2.79231	-0.184282	1.08488	1.76e-11		ABCA3|21	1.00919	4.35174	4.08e-07	1.5e-06
cg00040588	1	1290712	MXRA8	chr1:1289707-1291126	0.617942	0.342232	0.27571	3.24786e-17	3.78435e-15		cg20598921	1	2435827	PLCH2	chr1:2435554-2435828	0.693952	0.437793	0.256159	7.31216e-13	1.29186e-09		cg21107210	1	2253813	MORN1	chr1:2253723-2254758	0.482498	0.201553	0.280945	1.24185e-11	4.1805e-10		ABCA13|154664	-1.15438	0.42791	1.86258e-06	5.58712e-06		ABCA6|23460	1.00801	-1.02342	1.53717	0.00012778		ABCA6|23460	-1.9585	0.822959	1.11e-17	1.56e-16
cg03136646	1	1567257	MMP23A;MMP23B	chr1:1564421-1570006	0.661159	0.376369	0.28479	2.88293e-16	2.5793e-14		cg12905252	1	3028813	PRDM16	chr1:3028179-3028557	0.780986	0.508661	0.272325	9.19316e-06	0.000188304		cg14510359	1	2559930	MMEL1	chr1:2559892-2561055	0.587349	0.329261	0.258087	1.11631e-10	2.92729e-09		ABCA17P|650655	1.34251	-0.212032	1.8989e-05	4.99247e-05		ABCB1|5243	-1.79417	4.7904	1.67959	1.82e-09		ABCA8|10351	-2.57323	1.58126	8.75e-19	1.4e-17
cg11798909	1	1567820	MMP23A;MMP23B	chr1:1564421-1570006	0.596616	0.270232	0.326384	1.62473e-20	4.87212e-18		cg20154143	1	3087709	PRDM16		0.4096	0.125722	0.283878	8.67475e-10	1.50433e-07		cg11677857	1	2560350	MMEL1	chr1:2559892-2561055	0.712546	0.401677	0.310868	1.38033e-12	6.10218e-11		ABCA3|21	2.10795	3.70564	1.16412e-26	2.02181e-25		ABCB4|5244	-1.42989	0.382165	2.41333	5.41e-12		ABCA9|10350	-1.61826	0.306859	3.38e-12	2.43e-11
cg03950120	1	1889924	KIAA1751	chr1:1886344-1886870	0.806727	0.54523	0.261497	2.27435e-12	7.04937e-11		cg14217558	1	3087734	PRDM16		0.32243	0.0613491	0.261081	1.56904e-07	7.78485e-06		cg09074856	1	2979817	FLJ42875	chr1:2979275-2980758	0.694407	0.431851	0.262556	2.78437e-13	1.53928e-11		ABCB1|5243	-1.96626	5.35046	3.66116e-18	3.42951e-17		ABCB5|340273	1.22358	-3.0491	1.67684	0.00642385		ABCB1|5243	-1.94294	5.21704	6.84e-17	8.82e-16
cg22344830	1	1935048	KIAA1751	chr1:1935166-1935452	0.404602	0.0823249	0.322277	8.53739e-13	2.94705e-11		cg00581154	1	3123695	PRDM16		0.64332	0.351177	0.292142	1.99406e-09	2.79279e-07		cg12050271	1	2980399	FLJ42875	chr1:2979275-2980758	0.661625	0.344624	0.317001	5.5321e-16	7.74062e-14		ABCB4|5244	-1.49784	0.77121	2.83899e-18	2.68187e-17		ABCC13|150000	-1.50655	-0.305539	1.54642	2.17e-06		ABCB11|8647	-1.32198	-1.57889	0.0005901	0.00134738
cg26067203	1	1935289	KIAA1751	chr1:1935166-1935452	0.466618	0.0522385	0.41438	7.00994e-14	3.23857e-12		cg10201191	1	3163472	PRDM16	chr1:3163969-3164643	0.84215	0.56663	0.27552	1.19294e-07	6.28678e-06		cg05346286	1	2980598	FLJ42875	chr1:2979275-2980758	0.560281	0.286228	0.274053	3.31101e-17	7.40121e-15		ABCB5|340273	1.16094	-3.16437	5.5754e-05	0.000137254		ABCC2|1244	1.01046	1.51125	2.29289	0.00547775		ABCB4|5244	-2.30417	1.37108	5.4e-29	3.39e-27
cg08114317	1	1935535	KIAA1751	chr1:1935166-1935452	0.549755	0.257259	0.292496	2.5835e-16	2.33635e-14		cg13434489	1	3189088	PRDM16		0.715938	0.434969	0.280969	1.25996e-07	6.57738e-06		cg00945293	1	2984869	PRDM16;FLJ42875	chr1:2983925-2987962	0.589304	0.31836	0.270944	2.24371e-08	3.47171e-07		ABCC13|150000	-1.14779	-0.26997	2.14695e-06	6.39395e-06		ABLIM3|22885	1.3959	3.36316	1.98476	1.43e-09		ABCB5|340273	-1.51668	-1.98127	1.86e-06	6.2e-06
cg00014118	1	1935561	KIAA1751	chr1:1935166-1935452	0.721075	0.447615	0.27346	2.44845e-17	2.95259e-15		cg12593511	1	3276753	PRDM16	chr1:3275029-3275284	0.507166	0.22407	0.283095	4.68561e-07	1.81311e-05		cg20154143	1	3087709	PRDM16		0.4096	0.106077	0.303523	3.70503e-11	1.09991e-09		ABCC2|1244	-1.49822	3.15931	6.55316e-08	2.34846e-07		ABP1|26	-1.5184	7.86218	1.93001	1.13e-15		ABCC9|10060	-1.2591	2.77577	7.53e-15	7.51e-14
cg17854471	1	1950036	GABRD	chr1:1950411-1951479	0.635048	0.287187	0.347862	1.05528e-21	4.32248e-19		cg00087546	1	3308286	PRDM16	chr1:3310102-3311035	0.769958	0.499341	0.270616	1.71938e-09	2.48837e-07		cg14217558	1	3087734	PRDM16		0.32243	0.0423671	0.280063	1.42621e-08	2.30594e-07		ABCC6|368	-1.3022	3.87235	1.48269e-19	1.53371e-18		ACCN3|9311	1.10761	0.267614	1.74598	0.00010289		ABCG5|64240	1.47893	-0.0259619	5.15e-08	2.13e-07
cg09107007	1	1950616	GABRD	chr1:1950411-1951479	0.577709	0.174615	0.403094	1.40768e-17	1.80595e-15		cg05968369	1	3320446	PRDM16	chr1:3321269-3322310	0.693283	0.363389	0.329894	9.62817e-12	6.95496e-09		cg22729726	1	3123854	PRDM16		0.541613	0.291201	0.250412	1.5389e-14	1.31542e-12		ABCC6P1|653190	-1.35572	1.93922	2.9978e-14	2.02049e-13		ACE2|59272	-1.29556	4.74884	1.76904	3.82e-05		ABI3BP|25890	-1.54863	3.10547	3.05e-13	2.48e-12
cg16269144	1	2003326	PRKCZ	chr1:2005179-2005565	0.882447	0.569256	0.313191	1.06258e-24	9.30238e-22		cg21811896	1	3465381	MEGF6		0.752729	0.489313	0.263415	3.74466e-07	1.52743e-05		cg09187007	1	3514990	MEGF6	chr1:3511709-3512118	0.496928	0.236238	0.26069	8.68631e-10	1.85043e-08		ABCC6P2|730013	-1.49405	1.94825	1.14364e-27	2.11811e-26		ACMSD|130013	1.42704	-3.21483	1.64669	0.0240538		ABRA|137735	-1.73171	-3.03054	5.8e-08	2.38e-07
cg04314111	1	2003577	PRKCZ	chr1:2005179-2005565	0.637058	0.324956	0.312102	1.73825e-12	5.56559e-11		cg23108037	1	3507069	MEGF6		0.609541	0.352094	0.257446	7.24896e-11	2.67414e-08		cg12065138	1	4771201	AJAP1	chr1:4771652-4772545	0.569428	0.25567	0.313758	1.24144e-14	1.09929e-12		ABCC8|6833	1.41354	-2.19066	4.34322e-09	1.77121e-08		ACOX2|8309	-1.47219	3.91118	1.82249	2.03e-10		ACADL|33	-1.33969	-2.2268	0.00248316	0.00507571
cg22332339	1	2003605	PRKCZ	chr1:2005179-2005565	0.561637	0.247861	0.313776	6.23433e-11	1.36834e-09		cg20826162	1	3511710	MEGF6	chr1:3511709-3512118	0.80068	0.515926	0.284754	4.27191e-08	2.81856e-06		cg13851144	1	6239475	CHD5	chr1:6239237-6240814	0.456646	0.0585797	0.398067	3.09265e-13	1.68431e-11		ABCD2|225	1.34753	-1.34962	1.23735e-16	1.03088e-15		ACOXL|55289	1.49061	-0.859935	1.86026	4.09e-07		ACCN3|9311	1.36214	0.0243559	6e-11	3.68e-10
cg13077150	1	2004222	PRKCZ	chr1:2005179-2005565	0.837873	0.540081	0.297793	1.42483e-24	1.21828e-21		cg17471939	1	3600879	TP73		0.687292	0.388219	0.299073	1.37958e-08	1.18408e-06		cg08080029	1	6239970	CHD5	chr1:6239237-6240814	0.524682	0.0570073	0.467674	4.40312e-12	1.68493e-10		ABCG5|64240	1.96586	-0.381183	2.611e-19	2.65321e-18		ACP5|54	1.36015	5.63875	1.5652	3.47e-15		ACE2|59272	-1.52892	5.18388	1.3e-08	5.91e-08
cg25845463	1	2064046	PRKCZ	chr1:2063782-2064052	0.715673	0.458501	0.257172	3.98592e-12	1.16397e-10		cg13851144	1	6239475	CHD5	chr1:6239237-6240814	0.456646	0.1566	0.300046	1.0102e-07	5.52018e-06		cg17724171	1	6240267	CHD5	chr1:6239237-6240814	0.352609	0.0372184	0.31539	1.5445e-09	3.09974e-08		ABCG8|64241	2.32802	-0.986264	1.82288e-19	1.87151e-18		ACR|49	-1.11093	-1.94714	1.83432	0.00048885		ACMSD|130013	-2.24545	-1.61957	0.00115163	0.0025047
cg20975074	1	2066430	PRKCZ	chr1:2066367-2066666	0.737466	0.454604	0.282862	1.88067e-31	5.80586e-28		cg08080029	1	6239970	CHD5	chr1:6239237-6240814	0.524682	0.199758	0.324923	1.80604e-06	5.22354e-05		cg22902824	1	6240271	CHD5	chr1:6239237-6240814	0.42426	0.0388426	0.385418	6.68676e-12	2.43037e-10		ABLIM2|84448	-1.15874	4.79238	8.47474e-21	9.47452e-20		ACSL6|23305	-2.08543	2.03292	1.77902	7.53e-08		ACOT12|134526	-5.92766	-1.7418	7.51e-11	4.57e-10
cg00866690	1	2066631	PRKCZ	chr1:2066367-2066666	0.940695	0.590144	0.350551	1.13293e-31	3.73327e-28		cg22902824	1	6240271	CHD5	chr1:6239237-6240814	0.42426	0.132257	0.292003	8.89796e-08	4.99533e-06		cg24151926	1	6240455	CHD5	chr1:6239237-6240814	0.434912	0.0666635	0.368248	2.80684e-10	6.69905e-09		ABLIM3|22885	1.86111	2.81366	3.48044e-41	1.54962e-39		ACSM5|54988	1.15488	-2.59244	1.68213	0.0001717		ACOXL|55289	1.56933	-1.07119	9.41e-13	7.23e-12
cg24042578	1	2066981	PRKCZ	chr1:2066367-2066666	0.699904	0.395792	0.304112	1.7127e-15	1.24115e-13		cg24151926	1	6240455	CHD5	chr1:6239237-6240814	0.434912	0.158972	0.27594	1.81452e-06	5.24416e-05		cg14995214	1	6240463	CHD5	chr1:6239237-6240814	0.378214	0.12072	0.257494	5.23525e-10	1.17106e-08		ACAP1|9744	1.07946	2.57802	2.20314e-13	1.36532e-12		ACTBL2|345651	3.0776	-2.07806	2.19499	8.66e-13		ACR|49	-1.34456	-1.63936	2.39e-08	1.04e-07
cg21107210	1	2253813	MORN1	chr1:2253723-2254758	0.482498	0.182692	0.299806	1.49892e-12	4.88443e-11		cg08706545	1	6240508	CHD5	chr1:6239237-6240814	0.495433	0.240371	0.255062	2.11386e-07	9.83564e-06		cg08706545	1	6240508	CHD5	chr1:6239237-6240814	0.495433	0.120285	0.375148	8.09136e-14	5.35394e-12		ACCN1|40	-1.48714	-0.152792	6.57573e-07	2.09163e-06		ACTC1|70	1.1587	-0.329104	1.22867	0.00027697		ACSL6|23305	-2.96418	3.1467	3.08e-18	4.6e-17
cg13865934	1	2262474	MORN1	chr1:2266007-2266432	0.585688	0.317946	0.267742	4.00593e-12	1.169e-10		cg00282347	1	6241040	CHD5	chr1:6241031-6241251	0.528004	0.255771	0.272233	3.49756e-06	8.79114e-05		cg00282347	1	6241040	CHD5	chr1:6241031-6241251	0.528004	0.137178	0.390826	1.26207e-11	4.24079e-10		ACCN3|9311	2.15333	-0.457679	6.18231e-36	1.99962e-34		ACTL8|81569	1.49139	2.08041	1.40124	0.00154321		ACSM2A|123876	-8.02914	0.26471	3.73e-16	4.38e-15
cg15824094	1	2429005	PLCH2		0.619165	0.353716	0.265449	5.0932e-09	7.13728e-08		cg23972860	1	7395024	CAMTA1		0.576371	0.321968	0.254404	1.57581e-09	2.33632e-07		cg16034168	1	6336711	ACOT7	chr1:6339948-6340268	0.73157	0.452298	0.279272	4.03822e-08	5.93581e-07		ACE2|59272	-2.43166	6.09637	1.14664e-27	2.12146e-26		ADAM11|4185	1.36242	-1.31381	1.01733	1.88e-07		ACSM2B|348158	-8.3036	0.214415	2.49e-14	2.33e-13
cg20598921	1	2435827	PLCH2	chr1:2435554-2435828	0.693952	0.390307	0.303644	7.15638e-18	1.00303e-15		cg22488970	1	7763908	CAMTA1	chr1:7764593-7765856	0.438657	0.104688	0.33397	2.32104e-06	6.37635e-05		cg21144493	1	7130061	CAMTA1		0.695847	0.380426	0.315421	5.85351e-25	3.50346e-21		ACOT8|10005	-1.33178	5.54085	2.76539e-46	1.86314e-44		ADAM12|8038	2.03263	3.94429	-1.47035	4.34e-22		ACSM5|54988	-3.08073	-0.0814328	1.81e-15	1.97e-14
cg14510359	1	2559930	MMEL1	chr1:2559892-2561055	0.587349	0.300677	0.286672	1.61269e-12	5.2094e-11		cg04994795	1	8404050	SLC45A1	chr1:8403697-8404102	0.623145	0.329054	0.294091	5.09461e-09	5.59179e-07		cg09272923	1	7730096	CAMTA1		0.696793	0.446344	0.250449	8.21033e-09	1.39977e-07		ACOX2|8309	-1.3923	4.18574	1.13621e-16	9.50603e-16		ADAM22|53616	1.15317	0.981367	-2.33022	2.24e-07		ACSS3|79611	-2.22424	1.41725	1.53e-21	3.46e-20
cg11677857	1	2560350	MMEL1	chr1:2559892-2561055	0.712546	0.3946	0.317946	7.65465e-13	2.68167e-11		cg15554087	1	8404216	SLC45A1	chr1:8403697-8404102	0.724569	0.464713	0.259856	2.59222e-11	1.33375e-08		cg22488970	1	7763908	CAMTA1	chr1:7764593-7765856	0.438657	0.0649406	0.373717	8.19571e-08	1.12926e-06		ACOXL|55289	2.13462	-1.41976	2.0635e-29	4.29891e-28		ADAM32|203102	-2.06881	0.386945	1.01448	4.61e-10		ACTA1|58	-1.35173	-1.39222	1.13e-07	4.43e-07
cg23969554	1	2979311	FLJ42875	chr1:2979275-2980758	0.602578	0.311698	0.29088	4.90046e-14	2.3644e-12		cg17325959	1	9711961	PIK3CD	chr1:9711780-9713001	0.575976	0.290632	0.285345	1.55504e-06	4.64038e-05		cg08640609	1	7764642	CAMTA1	chr1:7764593-7765856	0.286962	0.0316721	0.25529	1.61771e-06	1.66734e-05		ACP5|54	1.01323	5.50625	1.69528e-20	1.84558e-19		ADAM8|101	1.09755	4.44272	1.32322	4.84e-08		ACTA2|59	-1.65478	8.73639	7.73e-37	1.88e-34
cg07523753	1	2979582	FLJ42875	chr1:2979275-2980758	0.656998	0.397503	0.259495	1.92015e-13	7.9125e-12		cg20413202	1	10056853	RBP7	chr1:10057121-10058108	0.470349	0.182212	0.288137	2.80621e-08	2.04167e-06		cg16895792	1	9711653	PIK3CD	chr1:9711780-9713001	0.326184	0.064348	0.261836	9.20763e-07	1.00307e-05		ACR|49	-2.03654	-1.04265	1.86654e-16	1.53149e-15		ADAMTS12|81792	1.31727	2.41482	-1.91546	2.96e-09		ACTC1|70	-1.71928	1.40797	1.72e-13	1.45e-12
cg09074856	1	2979817	FLJ42875	chr1:2979275-2980758	0.694407	0.363474	0.330933	1.98884e-17	2.45435e-15		cg18086187	1	10057158	RBP7	chr1:10057121-10058108	0.308628	0.03611	0.272518	2.28105e-07	1.04365e-05		cg17325959	1	9711961	PIK3CD	chr1:9711780-9713001	0.575976	0.120563	0.455413	1.23656e-17	3.29427e-15		ACRBP|84519	1.22274	1.06653	5.08096e-21	5.76704e-20		ADAMTS16|170690	1.41058	-0.460669	-1.48756	1.04e-06		ACTG2|72	-2.57556	7.94248	1.13e-23	3.39e-22
cg12905252	1	3028813	PRDM16	chr1:3028179-3028557	0.780986	0.491946	0.28904	1.90704e-09	2.96029e-08		cg08806699	1	10057970	RBP7	chr1:10057121-10058108	0.423669	0.148423	0.275246	2.37439e-11	1.26609e-08		cg18086187	1	10057158	RBP7	chr1:10057121-10058108	0.308628	0.0343595	0.274269	1.97167e-07	2.49243e-06		ACSBG2|81616	-1.00354	-2.71655	1.90819e-05	5.01307e-05		ADAMTS2|9509	2.01993	4.09251	1.9821	1.77e-20		ACTL6B|51412	-1.83416	-3.07809	0.00120228	0.00260893
cg16265140	1	3078206	PRDM16	chr1:3080934-3081292	0.774651	0.506182	0.26847	1.93042e-15	1.3799e-13		cg15090005	1	10058068	RBP7	chr1:10057121-10058108	0.524209	0.249814	0.274394	2.37059e-10	5.89101e-08		cg08806699	1	10057970	RBP7	chr1:10057121-10058108	0.423669	0.136969	0.2867	5.07784e-12	1.90607e-10		ACSL6|23305	-3.45304	3.7506	1.78232e-34	5.19111e-33		ADAMTS20|80070	-2.78282	-3.29813	1.44555	3.31e-05		ACTL8|81569	2.49218	1.56459	3.26e-15	3.43e-14
cg02299950	1	3087637	PRDM16		0.381626	0.118869	0.262757	1.12588e-09	1.84383e-08		cg06758644	1	12533120	VPS13D		0.593404	0.22906	0.364344	4.71767e-17	3.45895e-12		cg15090005	1	10058068	RBP7	chr1:10057121-10058108	0.524209	0.196185	0.328024	8.47195e-15	7.95587e-13		ACTBL2|345651	4.1721	-2.6819	7.87184e-46	5.14812e-44		ADAMTS4|9507	1.40729	4.28797	1.28543	6.07e-18		ACTN2|88	-1.66136	-2.5132	4.05e-09	1.97e-08
cg20154143	1	3087709	PRDM16		0.4096	0.0806038	0.328996	3.68872e-12	1.08736e-10		cg23813012	1	14026482	PRDM2	chr1:14026481-14027200	0.425513	0.0801854	0.345327	6.58844e-10	1.23702e-07		cg09018444	1	11539599	PTCHD2	chr1:11538669-11540342	0.397117	0.128404	0.268713	3.35345e-10	7.86285e-09		ACTL8|81569	1.39963	1.77758	8.81486e-07	2.75382e-06		ADAMTSL4|54507	1.32024	2.93946	-1.49935	5.7e-16		ADAD2|161931	-3.60768	-1.5956	3.27e-13	2.66e-12
cg14217558	1	3087734	PRDM16		0.32243	0.0292346	0.293195	4.53984e-09	6.43948e-08		cg00922376	1	14026584	PRDM2	chr1:14026481-14027200	0.442306	0.036145	0.406161	8.64651e-10	1.50433e-07		cg20692414	1	11539744	PTCHD2	chr1:11538669-11540342	0.38503	0.130392	0.254638	3.58746e-11	1.06912e-09		ADAM11|4185	1.12416	-1.47872	9.02928e-11	4.35935e-10		ADCY2|108	1.46476	-0.452927	1.91413	9.24e-07		ADAM12|8038	-1.20588	5.54147	5.56e-12	3.89e-11
cg26435254	1	3087999	PRDM16		0.407734	0.146886	0.260849	4.89978e-14	2.3644e-12		cg05346841	1	14026590	PRDM2	chr1:14026481-14027200	0.393844	0.0324549	0.361389	6.84106e-10	1.27547e-07		cg01368812	1	11539801	PTCHD2	chr1:11538669-11540342	0.389856	0.0927732	0.297083	1.86393e-11	5.99063e-10		ADAM12|8038	1.48618	3.71347	9.88369e-28	1.83816e-26		ADCYAP1|116	1.16105	-0.610956	1.13799	0.00020213		ADAM23|8745	-1.84274	0.94857	1.96e-21	4.39e-20
cg00581154	1	3123695	PRDM16		0.64332	0.347078	0.296242	7.40435e-11	1.59811e-09		cg09765994	1	14026605	PRDM2	chr1:14026481-14027200	0.395899	0.0308447	0.365055	3.34308e-09	4.104e-07		cg06630737	1	11752109	MAD2L2;C1orf187	chr1:11750701-11752651	0.467619	0.196146	0.271473	4.27033e-08	6.24663e-07		ADAM21|8747	1.31739	-2.70323	4.8158e-09	1.95412e-08		ADD2|119	1.29823	-2.17976	1.93316	4.22e-06		ADAM29|11086	-1.77233	-3.50105	0.00012437	0.00031677
cg22729726	1	3123854	PRDM16		0.541613	0.215529	0.326084	6.87532e-19	1.30088e-16		cg07596209	1	14026618	PRDM2	chr1:14026481-14027200	0.28732	0.0234266	0.263894	1.97218e-07	9.32179e-06		cg01807377	1	11919215	NPPB	chr1:11919115-11919555	0.53683	0.222757	0.314073	4.0664e-14	2.98742e-12		ADAM28|10863	1.65948	2.19677	7.43906e-28	1.39367e-26		ADH4|127	-1.1368	-0.45165	-1.36619	0.00899446		ADAM32|203102	-1.81032	0.478055	4.81e-12	3.39e-11
cg17489690	1	3136333	PRDM16		0.877909	0.59553	0.282379	1.65865e-14	9.14365e-13		cg25851313	1	16400665	FAM131C	chr1:16399648-16400072	0.470426	0.217862	0.252564	2.00577e-06	5.68463e-05		cg04779720	1	11919376	NPPB	chr1:11919115-11919555	0.537564	0.182226	0.355338	8.33064e-13	3.96362e-11		ADAM32|203102	-2.32105	1.01416	1.71044e-21	2.02079e-20		ADIPOQ|9370	3.50552	-1.76309	2.11628	3.15e-07		ADAM33|80332	-2.12587	2.1521	9.2e-27	4.1e-25
cg17493795	1	3273407	PRDM16	chr1:3275029-3275284	0.736001	0.455017	0.280984	1.04603e-14	6.08562e-13		cg05055766	1	17307215	MFAP2	chr1:17306551-17307363	0.415835	0.160339	0.255496	4.92531e-06	0.000115147		cg23813012	1	14026482	PRDM2	chr1:14026481-14027200	0.425513	0.0764724	0.34904	4.48774e-10	1.02209e-08		ADAM8|101	1.44323	3.99718	2.05571e-26	3.51222e-25		ADORA1|134	1.47157	1.12319	1.37243	2.3e-11		ADAMTS1|9510	-1.08582	5.08826	2.84e-16	3.39e-15
cg04483711	1	3347994	PRDM16	chr1:3351365-3351632	0.823026	0.554786	0.26824	2.41085e-18	3.91064e-16		cg10329579	1	17754830	RCC2		0.654721	0.37686	0.277861	2.49679e-10	6.09698e-08		cg00922376	1	14026584	PRDM2	chr1:14026481-14027200	0.442306	0.034991	0.407315	7.49406e-10	1.62118e-08		ADAMTS2|9509	1.40599	3.89664	3.9874e-25	6.2013e-24		ADORA3|140	1.42505	1.28762	4.87533	4.21e-12		ADAMTS10|81794	-1.27434	2.2736	1.57e-19	2.76e-18
cg23108037	1	3507069	MEGF6		0.609541	0.33999	0.269551	2.1177e-12	6.6177e-11		cg19585156	1	18436490	IGSF21	chr1:18436551-18437673	0.615563	0.326326	0.289237	3.42151e-08	2.37615e-06		cg05346841	1	14026590	PRDM2	chr1:14026481-14027200	0.393844	0.0308506	0.362993	5.88409e-10	1.30111e-08		ADAMTS20|80070	-2.4423	-3.17867	7.46237e-05	0.000180281		ADRA1D|146	1.28599	-1.74277	1.84948	0.00016263		ADAMTS12|81792	-1.27247	3.89515	4.05e-15	4.2e-14
cg20826162	1	3511710	MEGF6	chr1:3511709-3512118	0.80068	0.450812	0.349867	1.66155e-15	1.20676e-13		cg03321592	1	19991676	HTR6	chr1:19991146-19992788	0.590004	0.183988	0.406016	8.44769e-11	2.92849e-08		cg09765994	1	14026605	PRDM2	chr1:14026481-14027200	0.395899	0.0289061	0.366993	2.83767e-09	5.3747e-08		ADAMTS4|9507	1.12886	4.10468	6.23357e-26	1.02011e-24		AEBP1|165	1.34728	7.17711	-2.78632	3.23e-13		ADAMTS16|170690	-2.1252	1.68367	4.36e-20	8.19e-19
cg09187007	1	3514990	MEGF6	chr1:3511709-3512118	0.496928	0.184944	0.311984	1.54923e-12	5.0327e-11		cg01468656	1	19991678	HTR6	chr1:19991146-19992788	0.576492	0.242043	0.334449	3.66521e-11	1.70893e-08		cg07596209	1	14026618	PRDM2	chr1:14026481-14027200	0.28732	0.0226349	0.264685	1.73053e-07	2.2149e-06		ADAMTSL2|9719	-1.57929	3.32734	1.40508e-25	2.24586e-24		AGTR1|185	1.32188	-1.94649	1.12286	0.00063491		ADAMTS18|170692	-2.06502	-0.542951	9.3e-18	1.32e-16
cg04562683	1	3638722	TP73	chr1:3634633-3635101	0.717492	0.448665	0.268827	3.85994e-08	4.38482e-07		cg15613048	1	21044031	KIF17	chr1:21043832-21044771	0.483764	0.230095	0.253669	1.47897e-06	4.46321e-05		cg27544000	1	17034075	ESPNP	chr1:17033768-17034728	0.311589	0.0507814	0.260808	3.54161e-12	1.39213e-10		ADCY5|111	-1.36807	0.819455	5.76744e-10	2.56788e-09		AGXT|189	-1.25153	-0.244132	1.10692	0.00171401		ADAMTS20|80070	-2.66072	-3.22171	5.26e-06	1.65e-05
cg02214783	1	3688257	LOC388588	chr1:3688553-3689684	0.665256	0.403947	0.261309	9.74337e-16	7.59568e-14		cg08890418	1	21044141	KIF17	chr1:21043832-21044771	0.558875	0.260523	0.298352	1.99687e-06	5.66596e-05		cg05055766	1	17307215	MFAP2	chr1:17306551-17307363	0.415835	0.10567	0.310165	8.39654e-09	1.4292e-07		ADH4|127	-1.26112	-0.0670157	3.60838e-05	9.12909e-05		AHNAK2|113146	1.9803	5.5686	1.66833	6.03e-15		ADAMTS3|9508	-1.33515	0.00763378	1.15e-24	3.86e-23
cg12065138	1	4771201	AJAP1	chr1:4771652-4772545	0.569428	0.168084	0.401344	1.50261e-19	3.37169e-17		cg23841903	1	21058444	SH2D5	chr1:21058006-21059366	0.42676	0.0748689	0.351891	2.07133e-10	5.39423e-08		cg19585156	1	18436490	IGSF21	chr1:18436551-18437673	0.615563	0.223453	0.39211	1.05871e-16	1.92495e-14		ADIPOQ|9370	1.40644	-1.76906	0.00249437	0.00474358		AICDA|57379	-1.64982	-2.33621	1.91104	0.00180046		ADAMTS7|11173	-1.12239	3.804	2.99e-20	5.74e-19
cg20773915	1	6171788	CHD5		0.565548	0.301206	0.264342	2.3497e-12	7.25762e-11		cg04902671	1	21058625	SH2D5	chr1:21058006-21059366	0.331998	0.029469	0.302529	4.36285e-11	1.90294e-08		cg01962676	1	18436969	IGSF21	chr1:18436551-18437673	0.532461	0.225275	0.307186	2.03868e-12	8.57935e-11		ADM|133	1.17931	4.64601	3.56923e-27	6.43688e-26		AIF1|199	1.03076	3.44877	1.9087	9.15e-11		ADAMTS8|11095	-2.04033	1.28047	2.26e-16	2.73e-15
cg13851144	1	6239475	CHD5	chr1:6239237-6240814	0.456646	0.0584225	0.398224	2.96286e-13	1.16215e-11		cg03472655	1	21058966	SH2D5	chr1:21058006-21059366	0.43789	0.0939143	0.343976	1.99465e-10	5.26227e-08		cg25020286	1	18956947	PAX7	chr1:18956895-18959829	0.657414	0.403582	0.253832	1.55091e-12	6.75345e-11		ADORA3|140	1.33278	1.00109	8.03224e-26	1.30371e-24		AIF1L|83543	1.14468	3.43132	1.93303	3.16e-07		ADAMTSL1|92949	-1.63763	2.30856	3.67e-25	1.29e-23
cg08080029	1	6239970	CHD5	chr1:6239237-6240814	0.524682	0.0487159	0.475966	2.86431e-12	8.66908e-11		cg26840598	1	21059114	SH2D5	chr1:21058006-21059366	0.400911	0.0453482	0.355563	2.36822e-10	5.89101e-08		cg05052324	1	18957020	PAX7	chr1:18956895-18959829	0.645092	0.369958	0.275134	2.22317e-12	9.24956e-11		ADRB1|153	2.31861	-0.0664623	2.46806e-41	1.11275e-39		AIFM3|150209	-1.79471	4.49022	1.81792	1.18e-11		ADAMTSL2|9719	-1.92888	3.53208	9.68e-34	1.29e-31
cg17724171	1	6240267	CHD5	chr1:6239237-6240814	0.352609	0.0301692	0.32244	8.82777e-10	1.48153e-08		cg05704196	1	21059189	SH2D5	chr1:21058006-21059366	0.37019	0.0696434	0.300547	1.04971e-09	1.72082e-07		cg11428724	1	18957632	PAX7	chr1:18956895-18959829	0.603325	0.290111	0.313213	1.75579e-20	1.62403e-17		ADSSL1|122622	1.44023	0.848841	1.05935e-16	8.89634e-16		AIM2|9447	1.79892	2.24491	-1.31774	7.83e-08		ADAMTSL3|57188	-2.28315	1.91063	6.08e-28	3.31e-26
cg22902824	1	6240271	CHD5	chr1:6239237-6240814	0.42426	0.0346928	0.389568	5.30824e-12	1.50239e-10		cg07717763	1	21059365	SH2D5	chr1:21058006-21059366	0.363771	0.103363	0.260409	8.21328e-10	1.45632e-07		cg00065215	1	18959268	PAX7	chr1:18956895-18959829	0.678197	0.41284	0.265357	2.55482e-09	4.89013e-08		AFAP1L2|84632	1.68621	4.37848	1.99628e-58	3.07255e-56		AK5|26289	-1.19555	-1.28036	2.07114	0.00070989		ADARB2|105	-1.46758	-1.94077	1.09e-07	4.29e-07
cg24151926	1	6240455	CHD5	chr1:6239237-6240814	0.434912	0.0431454	0.391766	5.32052e-11	1.18751e-09		cg13554489	1	21835685	ALPL	chr1:21835548-21836344	0.400874	0.135819	0.265055	1.11786e-07	5.98251e-06		cg09366342	1	18963194	PAX7	chr1:18962842-18963481	0.550774	0.252716	0.298057	9.6036e-16	1.25793e-13		AFF2|2334	1.08006	-1.82648	1.41342e-07	4.87354e-07		AKAP12|9590	1.65543	4.57975	-1.53165	4.89e-10		ADCY5|111	-2.833	2	9e-31	7.48e-29
cg14995214	1	6240463	CHD5	chr1:6239237-6240814	0.378214	0.0981244	0.28009	5.39022e-11	1.20123e-09		cg07162257	1	21835692	ALPL	chr1:21835548-21836344	0.44312	0.147071	0.296049	2.87922e-07	1.24672e-05		cg08126203	1	18963477	PAX7	chr1:18962842-18963481	0.4195	0.137425	0.282076	3.15337e-11	9.54197e-10		AGAP2|116986	1.83914	2.5763	3.41659e-30	7.48463e-29		AKAP5|9495	-1.00635	3.15436	1.57215	1.11e-06		ADCY8|114	-2.29659	-3.17221	7.03e-05	0.00018603
cg08706545	1	6240508	CHD5	chr1:6239237-6240814	0.495433	0.124892	0.370541	1.2344e-13	5.34742e-12		cg22154616	1	21835703	ALPL	chr1:21835548-21836344	0.416414	0.131651	0.284763	4.83333e-08	3.09701e-06		cg13207345	1	18963670	PAX7	chr1:18964180-18964401	0.58959	0.302556	0.287034	3.04165e-12	1.2193e-10		AGBL4|84871	1.77387	-2.33461	2.84273e-11	1.44106e-10		AKAP7|9465	-1.05588	3.62776	1.0119	6.45e-08		ADCYAP1|116	-1.50388	0.937598	6.07e-10	3.29e-09
cg00282347	1	6241040	CHD5	chr1:6241031-6241251	0.528004	0.108615	0.419389	1.57392e-12	5.10386e-11		cg07952381	1	23040723	EPHB2	chr1:23036823-23038362	0.652047	0.396158	0.255888	3.41184e-09	4.15019e-07		cg24379252	1	18967409	PAX7	chr1:18967251-18968119	0.471101	0.211809	0.259292	7.86874e-09	1.34757e-07		AGPAT4|56895	1.4633	2.40361	6.29199e-36	2.03141e-34		AKNAD1|254268	-2.02199	-2.36168	1.88167	2.87e-11		ADCYAP1R1|117	-2.20181	-3.27416	9.29e-11	5.58e-10
cg16672535	1	6510652	ESPN	chr1:6511689-6512110	0.599165	0.294352	0.304812	3.75905e-19	7.66115e-17		cg00035000	1	25255003	RUNX3	chr1:25255527-25259005	0.472041	0.220175	0.251865	4.74029e-07	1.82947e-05		cg01797257	1	18969652	PAX7	chr1:18969548-18970739	0.632644	0.267326	0.365317	7.52171e-19	3.33727e-16		AGR2|10551	2.11677	9.71971	1.51679e-71	5.41615e-69		AKR1B10|57016	-1.09387	4.4738	-1.70059	0.00090036		ADD2|119	-2.00857	-0.396578	1.92e-15	2.09e-14
cg00014168	1	6511878	ESPN	chr1:6511689-6512110	0.865414	0.609675	0.255739	9.97259e-26	1.05206e-22		cg06377278	1	25256369	RUNX3	chr1:25255527-25259005	0.460963	0.135111	0.325851	1.85522e-09	2.6394e-07		cg07221967	1	18969717	PAX7	chr1:18969548-18970739	0.427932	0.117517	0.310415	5.46821e-13	2.75171e-11		AGR3|155465	1.21954	4.90166	3.04056e-10	1.39338e-09		AKR1B15|441282	-1.27052	-0.778813	1.38625	0.00972285		ADH1A|124	-4.9292	1.85666	1.04e-17	1.47e-16
cg27428051	1	6534879	PLEKHG5	chr1:6530536-6531814	0.538396	0.258339	0.280057	6.02332e-09	8.29886e-08		cg11018723	1	25256939	RUNX3	chr1:25255527-25259005	0.479562	0.192471	0.287091	1.89434e-08	1.50846e-06		cg22614355	1	19991237	HTR6	chr1:19991146-19992788	0.338843	0.0674096	0.271433	1.64471e-09	3.2849e-08		AGT|183	-1.71746	5.27591	2.50485e-27	4.5681e-26		AKR1C4|1109	-1.10609	0.642087	1.30423	0.00353425		ADH1B|125	-3.25463	4.91031	5.71e-16	6.56e-15
cg07793638	1	6675684	PHF13	chr1:6672786-6675741	0.356918	0.0839957	0.272922	6.17962e-09	8.49505e-08		cg13629563	1	25256949	RUNX3	chr1:25255527-25259005	0.464082	0.211741	0.252341	1.00975e-07	5.51875e-06		cg03321592	1	19991676	HTR6	chr1:19991146-19992788	0.590004	0.151579	0.438425	1.69806e-13	1.00444e-11		AGXT|189	-1.44314	0.166382	4.09558e-10	1.8559e-09		ALDH1A2|8854	-2.47715	3.39994	1.14013	2.61e-06		ADH4|127	-4.39041	2.63837	4.09e-14	3.71e-13
cg21144493	1	7130061	CAMTA1		0.695847	0.318495	0.377352	9.70376e-31	2.68479e-27		cg22737001	1	25257029	RUNX3	chr1:25255527-25259005	0.495146	0.228721	0.266425	2.62362e-08	1.94923e-06		cg01468656	1	19991678	HTR6	chr1:19991146-19992788	0.576492	0.221989	0.354503	3.78761e-13	2.0023e-11		AHCY|191	-1.02572	9.38983	2.08099e-30	4.65006e-29		ALG1L|200810	-1.12624	1.84789	1.80865	8.67e-08		ADHFE1|137872	-1.38414	-0.585834	1.79e-12	1.33e-11
cg20700460	1	7130299	CAMTA1		0.383615	0.113046	0.270569	5.34204e-11	1.19167e-09		cg26672794	1	25257131	RUNX3	chr1:25255527-25259005	0.556002	0.254189	0.301812	8.94224e-09	8.55764e-07		cg10741760	1	19992024	HTR6	chr1:19991146-19992788	0.554478	0.273575	0.280903	1.59442e-12	6.9234e-11		AHNAK2|113146	1.79391	5.18453	1.97061e-26	3.38952e-25		ALK|238	4.98029	-1.11191	1.44557	7.27e-16		ADIPOQ|9370	-5.03209	3.23051	1.86e-12	1.37e-11
cg22488970	1	7763908	CAMTA1	chr1:7764593-7765856	0.438657	0.0391274	0.39953	1.71776e-08	2.12171e-07		cg02970551	1	25257191	RUNX3	chr1:25255527-25259005	0.432089	0.166287	0.265802	8.82458e-12	6.62713e-09		cg27549720	1	19992167	HTR6	chr1:19991146-19992788	0.821279	0.501956	0.319322	8.80132e-21	9.56006e-18		AICDA|57379	1.09265	-3.29884	0.000188981	0.000430421		ALOX12|239	1.40834	-0.980108	1.23397	2.86e-06		ADRA1A|148	-2.30436	-2.6115	1.34e-10	7.92e-10
cg08640609	1	7764642	CAMTA1	chr1:7764593-7765856	0.286962	0.0167628	0.270199	4.87671e-07	4.23908e-06		cg05625889	1	25944100	MAN1C1	chr1:25944099-25944772	0.33984	0.0397688	0.300071	2.54888e-08	1.90651e-06		cg09511914	1	20878928	FAM43B	chr1:20878894-20880592	0.537607	0.252869	0.284738	1.93933e-17	4.77548e-15		AIF1|199	1.08716	3.18202	6.64594e-23	8.65475e-22		ALOX12B|242	1.43288	-0.550183	1.38022	1.86e-05		ADRA1B|147	-1.22655	-1.00273	5.63e-07	2.02e-06
cg04994795	1	8404050	SLC45A1	chr1:8403697-8404102	0.623145	0.28421	0.338934	1.03532e-11	2.73274e-10		cg05670408	1	25944102	MAN1C1	chr1:25944099-25944772	0.349906	0.0677331	0.282173	3.04665e-08	2.17399e-06		cg15613048	1	21044031	KIF17	chr1:21043832-21044771	0.483764	0.118884	0.364881	2.28659e-14	1.83978e-12		AIF1L|83543	1.77837	2.84128	3.73377e-37	1.29694e-35		ALOX15B|247	1.40637	1.85628	-1.08564	6.72e-05		ADRB1|153	1.14406	0.551644	4.26e-08	1.79e-07
cg15554087	1	8404216	SLC45A1	chr1:8403697-8404102	0.724569	0.443427	0.281142	9.49674e-15	5.60509e-13		cg10706230	1	25944514	MAN1C1	chr1:25944099-25944772	0.519864	0.169253	0.35061	5.84666e-12	4.8991e-09		cg09793172	1	21044101	KIF17	chr1:21043832-21044771	0.518212	0.244063	0.27415	4.95076e-20	3.54132e-17		AIFM3|150209	-2.13744	5.19061	6.73884e-29	1.35643e-27		ALOX5AP|241	1.21714	3.78576	1.6548	1.64e-12		ADRB3|155	-2.15366	-2.10943	4.48e-10	2.47e-09
cg19400316	1	8815225	RERE		0.776615	0.455211	0.321404	4.31485e-17	4.85588e-15		cg16836311	1	25944712	MAN1C1	chr1:25944099-25944772	0.842045	0.5892	0.252845	2.49541e-06	6.74821e-05		cg08890418	1	21044141	KIF17	chr1:21043832-21044771	0.558875	0.139613	0.419262	2.15347e-13	1.23255e-11		AIM2|9447	2.70469	1.48508	8.13472e-36	2.60749e-34		ALOXE3|59344	1.64861	-0.777867	-1.02706	8.69e-11		AEBP1|165	-1.47007	8.84004	2.49e-24	8.1e-23
cg25003147	1	9187683	GPR157	chr1:9188503-9189743	0.593339	0.306809	0.286529	4.28959e-13	1.60812e-11		cg02924562	1	26372469	SLC30A2	chr1:26372281-26373313	0.448972	0.135083	0.313889	7.29364e-09	7.33556e-07		cg23841903	1	21058444	SH2D5	chr1:21058006-21059366	0.42676	0.046445	0.380314	6.09125e-12	2.23358e-10		AIRE|326	-4.09183	-1.428	7.16541e-22	8.73251e-21		ALPK2|115701	1.37118	0.812382	-1.25346	4.17e-13		AFAP1L2|84632	1.03977	4.82839	7.45e-16	8.46e-15
cg26114570	1	9648299	TMEM201	chr1:9648586-9649517	0.565259	0.314024	0.251235	1.19826e-11	3.11184e-10		cg21957156	1	26372718	SLC30A2	chr1:26372281-26373313	0.451604	0.186519	0.265085	4.3147e-09	4.94489e-07		cg04902671	1	21058625	SH2D5	chr1:21058006-21059366	0.331998	0.0274988	0.3045	3.84988e-11	1.13681e-09		AJAP1|55966	1.10986	-1.76042	2.20167e-12	1.24237e-11		ALPK3|57538	-1.49334	4.30523	2.22e-07	1.73e-06		AFF3|3899	-1.6541	0.754381	1.29e-16	1.59e-15
cg16895792	1	9711653	PIK3CD	chr1:9711780-9713001	0.326184	0.0548059	0.271378	4.02981e-07	3.57765e-06		cg07766612	1	26372887	SLC30A2	chr1:26372281-26373313	0.588168	0.279199	0.308969	1.40049e-09	2.13476e-07		cg03472655	1	21058966	SH2D5	chr1:21058006-21059366	0.43789	0.0910062	0.346884	1.65995e-10	4.16872e-09		AK7|122481	1.13185	1.13028	4.02751e-16	3.21588e-15		ALPP|250	1.55622	1.21378	0.00038645	0.00142842		AFM|173	-5.96007	0.155031	2.18e-08	9.57e-08
cg17325959	1	9711961	PIK3CD	chr1:9711780-9713001	0.575976	0.147938	0.428038	1.73339e-16	1.65214e-14		cg00703260	1	26372895	SLC30A2	chr1:26372281-26373313	0.585364	0.241413	0.343951	3.82489e-10	8.29082e-08		cg26840598	1	21059114	SH2D5	chr1:21058006-21059366	0.400911	0.0289651	0.371946	6.79549e-11	1.87608e-09		AKAP12|9590	1.38122	4.32306	4.67193e-18	4.34214e-17		ALX1|8092	-1.92405	-2.79509	0.00164855	0.00514746		AG2|387763	-1.00433	5.15003	1.49e-12	1.12e-11
cg19309580	1	9747263	PIK3CD	chr1:9749295-9750228	0.315029	0.0538902	0.261139	2.43048e-07	2.28067e-06		cg18303360	1	26373288	SLC30A2	chr1:26372281-26373313	0.612665	0.324783	0.287881	2.82347e-09	3.59711e-07		cg05704196	1	21059189	SH2D5	chr1:21058006-21059366	0.37019	0.0626006	0.30759	5.90941e-10	1.30622e-08		AKAP14|158798	1.45379	-2.95834	7.914e-08	2.80908e-07		AMACR|23600	-1.02395	5.69858	1.42e-12	3.24e-11		AGAP2|116986	1.05613	3.08751	4.08e-11	2.56e-10
cg03265564	1	9748971	PIK3CD	chr1:9749295-9750228	0.540329	0.277518	0.262811	5.37396e-16	4.48379e-14		cg20415053	1	26527928	CATSPER4		0.673861	0.404505	0.269356	5.50726e-07	2.0549e-05		cg07717763	1	21059365	SH2D5	chr1:21058006-21059366	0.363771	0.0772541	0.286517	5.69686e-11	1.60418e-09		AKAP3|10566	1.28886	-0.0248382	8.08592e-15	5.72427e-14		AMT|275	-1.22075	3.16141	4.4e-07	3.22e-06		AGR2|10551	1.92171	10.0001	1.44e-35	2.61e-33
cg20413202	1	10056853	RBP7	chr1:10057121-10058108	0.470349	0.16138	0.308969	1.81116e-09	2.82748e-08		cg26040332	1	27960788	FGR	chr1:27960567-27961023	0.538226	0.207836	0.33039	7.98246e-09	7.82965e-07		cg17015803	1	21835620	ALPL	chr1:21835548-21836344	0.381303	0.115175	0.266128	4.64474e-10	1.05506e-08		AKAP4|8852	-1.14648	-2.07748	0.000621045	0.00130611		AMZ1|155185	1.73366	-1.51847	1.38e-13	3.8e-12		AGR3|155465	1.02103	5.12291	2.09e-06	6.93e-06
cg18086187	1	10057158	RBP7	chr1:10057121-10058108	0.308628	0.0260242	0.282604	1.0109e-07	1.04051e-06		cg26801631	1	27961017	FGR	chr1:27960567-27961023	0.513353	0.240206	0.273147	3.04433e-08	2.17362e-06		cg13554489	1	21835685	ALPL	chr1:21835548-21836344	0.400874	0.0978988	0.302975	4.06708e-11	1.19016e-09		AKNAD1|254268	-2.87554	-1.41025	8.4001e-33	2.19905e-31		ANGPTL1|9068	1.6003	-0.593601	1.38e-07	1.11e-06		AGT|183	-1.71553	5.17666	5.82e-16	6.68e-15
cg08806699	1	10057970	RBP7	chr1:10057121-10058108	0.423669	0.103326	0.320344	2.16538e-13	8.79091e-12		cg00338002	1	28198813	C1orf38	chr1:28199031-28199257	0.600205	0.312166	0.288039	1.06586e-08	9.79606e-07		cg07162257	1	21835692	ALPL	chr1:21835548-21836344	0.44312	0.0917065	0.351414	6.74647e-11	1.86465e-09		AKR1C4|1109	-1.34119	1.12193	5.50231e-05	0.000135595		ANGPTL2|23452	1.30076	5.17185	2.48e-19	2.12e-17		AGTR1|185	-2.9394	0.69032	5.71e-24	1.76e-22
cg15090005	1	10058068	RBP7	chr1:10057121-10058108	0.524209	0.168936	0.355273	8.08223e-16	6.45513e-14		cg02447380	1	28919300	RAB42	chr1:28919041-28919454	0.407508	0.124207	0.283301	1.483e-07	7.44044e-06		cg22154616	1	21835703	ALPL	chr1:21835548-21836344	0.416414	0.0948366	0.321578	5.82906e-11	1.63763e-09		ALDH1L1|10840	1.7727	3.75136	7.52379e-12	4.01344e-11		ANGPTL6|83854	1.02412	-1.45176	9.1e-07	6.25e-06		AGXT|189	-3.7362	2.14918	3.99e-15	4.14e-14
cg07224455	1	10058340	RBP7	chr1:10057121-10058108	0.910656	0.638397	0.272259	1.36415e-30	3.67039e-27		cg24118052	1	28919387	RAB42	chr1:28919041-28919454	0.552633	0.297541	0.255092	1.55723e-10	4.45996e-08		cg22685052	1	22777719	ZBTB40	chr1:22778236-22778817	0.951276	0.66203	0.289245	5.55304e-18	1.71068e-15		ALK|238	4.69056	-1.90881	6.7147e-47	4.62874e-45		ANK1|286	1.39774	1.36838	6.17e-09	6.61e-08		AGXT2|64902	-6.66961	-1.15543	3.94e-12	2.8e-11
cg09018444	1	11539599	PTCHD2	chr1:11538669-11540342	0.397117	0.108437	0.28868	4.3843e-11	9.98454e-10		cg08366446	1	29138936	OPRD1	chr1:29138501-29139348	0.489406	0.223782	0.265624	8.46037e-05	0.00106878		cg09266979	1	22777744	ZBTB40	chr1:22778236-22778817	0.893797	0.611755	0.282042	2.24589e-22	5.22749e-19		ALOX12B|242	2.10958	-1.13509	5.06369e-23	6.67211e-22		ANKFN1|162282	-1.22537	-2.00261	0.00032946	0.00123889		AGXT2L1|64850	-5.1639	-1.76655	6.92e-11	4.22e-10
cg20692414	1	11539744	PTCHD2	chr1:11538669-11540342	0.38503	0.111693	0.273337	4.59756e-12	1.3201e-10		cg25840576	1	29447971	TMEM200B	chr1:29447699-29451847	0.533334	0.265122	0.268212	1.13001e-09	1.81393e-07		cg11847808	1	22889611	EPHA8	chr1:22889595-22890096	0.667218	0.343297	0.323921	4.49324e-17	9.53684e-15		ALOX15B|247	2.90182	0.956095	6.36801e-48	4.62173e-46		ANKRD1|27063	3.15545	-1.98615	9.34e-14	2.65e-12		AHSG|197	-5.38031	3.9909	1.23e-11	8.23e-11
cg01368812	1	11539801	PTCHD2	chr1:11538669-11540342	0.389856	0.0694315	0.320425	2.46746e-12	7.58621e-11		cg03315764	1	29448425	TMEM200B	chr1:29447699-29451847	0.463273	0.143291	0.319982	5.96954e-11	2.34067e-08		cg11801107	1	22889721	EPHA8	chr1:22889595-22890096	0.533201	0.203351	0.32985	1.40645e-17	3.67627e-15		ALOX5|240	1.67212	4.20067	1.13298e-37	4.10307e-36		ANKRD30B|374860	-1.24517	-0.177756	0.00418277	0.0117185		AICDA|57379	-1.17672	-2.46226	0.00133711	0.0028826
cg06630737	1	11752109	MAD2L2;C1orf187	chr1:11750701-11752651	0.467619	0.193199	0.27442	3.13775e-08	3.64043e-07		cg08706732	1	29448625	TMEM200B	chr1:29447699-29451847	0.387495	0.110735	0.276759	1.11306e-09	1.79458e-07		cg10838091	1	22889780	EPHA8	chr1:22889595-22890096	0.508909	0.25677	0.252139	2.08667e-18	7.76612e-16		ALOX5AP|241	1.35949	3.42348	2.91126e-36	9.60771e-35		ANKRD34B|340120	-2.01174	-3.07584	5.21e-05	0.00023929		AIFM3|150209	-1.61256	4.62976	6.16e-12	4.28e-11
cg01807377	1	11919215	NPPB	chr1:11919115-11919555	0.53683	0.233297	0.303533	1.40855e-13	6.00696e-12		cg10165585	1	29449042	TMEM200B	chr1:29447699-29451847	0.54926	0.209305	0.339955	1.48874e-09	2.23444e-07		cg26404511	1	24229575	CNR2	chr1:24229115-24229537	0.539933	0.25205	0.287883	8.60596e-14	5.64005e-12		ALOXE3|59344	2.72541	-1.48134	6.92625e-44	3.90099e-42		ANO3|63982	-1.81398	-2.8775	1.7e-05	8.77e-05		AIM2|9447	1.76743	2.0147	4.91e-15	5.02e-14
cg04779720	1	11919376	NPPB	chr1:11919115-11919555	0.537564	0.186024	0.35154	1.08087e-12	3.64152e-11		cg08467760	1	29449845	TMEM200B	chr1:29447699-29451847	0.558303	0.238726	0.319577	1.72657e-10	4.81288e-08		cg07967717	1	24229682	CNR2	chr1:24229115-24229537	0.559938	0.296402	0.263536	3.30623e-15	3.58593e-13		ALPK2|115701	1.40609	0.485961	4.72805e-31	1.09204e-29		ANO7|50636	-1.98633	3.9195	1.03e-14	3.61e-13		AIRE|326	-5.59731	-0.314006	3.02e-22	7.45e-21
cg15929771	1	12466185	VPS13D		0.792525	0.397151	0.395374	1.01151e-20	3.19323e-18		cg08258259	1	29450102	TMEM200B	chr1:29447699-29451847	0.55246	0.184936	0.367524	7.77527e-10	1.40062e-07		cg00035000	1	25255003	RUNX3	chr1:25255527-25259005	0.472041	0.201656	0.270384	5.85637e-09	1.03441e-07		ALPK3|57538	-1.22125	4.4147	1.39536e-06	4.24987e-06		ANXA13|312	-1.01763	5.16166	0.00028993	0.00110379		AK5|26289	-2.0042	-0.425975	2.72e-20	5.24e-19
cg06758644	1	12533120	VPS13D		0.593404	0.238346	0.355058	7.91714e-17	8.27479e-15		cg05124308	1	29450569	TMEM200B	chr1:29447699-29451847	0.505219	0.226979	0.27824	3.71751e-09	4.42834e-07		cg00117172	1	25255838	RUNX3	chr1:25255527-25259005	0.528127	0.198873	0.329254	4.01067e-10	9.23694e-09		ALPP|250	2.3972	0.494852	1.19988e-13	7.64274e-13		ANXA8|653145	3.88739	0.19376	8.36e-19	6.24e-17		AKAP14|158798	1.13832	-2.83902	0.00095209	0.00210341
cg16432031	1	12674914	DHRS3	chr1:12676983-12678642	0.740568	0.476994	0.263574	3.36079e-12	9.99737e-11		cg19716902	1	29450584	TMEM200B	chr1:29447699-29451847	0.540015	0.176229	0.363787	2.84942e-09	3.6223e-07		cg19590532	1	25255920	RUNX3	chr1:25255527-25259005	0.523918	0.158533	0.365385	1.06e-12	4.8734e-11		ALPPL2|251	2.36568	2.12171	1.79764e-13	1.12693e-12		ANXA8L2|244	4.01597	-0.0636816	1.07e-23	2.46e-21		AKAP4|8852	-1.53442	-1.98766	0.00022813	0.00055621
cg23813012	1	14026482	PRDM2	chr1:14026481-14027200	0.425513	0.067051	0.358462	2.26121e-10	4.36031e-09		cg23905374	1	29450643	TMEM200B	chr1:29447699-29451847	0.491468	0.177419	0.314049	9.24769e-10	1.57774e-07		cg06377278	1	25256369	RUNX3	chr1:25255527-25259005	0.460963	0.0615198	0.399443	1.06146e-13	6.73228e-12		ALX1|8092	-2.32113	-2.26013	1.95208e-05	5.1216e-05		AP1S2|8905	1.06266	3.26505	4.6e-13	1.15e-11		AKAP6|9472	-1.05818	1.77478	1.39e-11	9.29e-11
cg00922376	1	14026584	PRDM2	chr1:14026481-14027200	0.442306	0.022752	0.419554	3.59721e-10	6.61841e-09		cg13548601	1	29450729	TMEM200B	chr1:29447699-29451847	0.498561	0.155359	0.343203	8.11309e-10	1.44292e-07		cg11018723	1	25256939	RUNX3	chr1:25255527-25259005	0.479562	0.10678	0.372782	1.01031e-15	1.31222e-13		AMACR|23600	-1.76033	6.61462	2.87819e-42	1.40402e-40		AP3B2|8120	3.14212	-0.393647	2.92e-10	4.04e-09		AKNAD1|254268	-2.83179	-1.58142	5.76e-25	1.99e-23
cg05346841	1	14026590	PRDM2	chr1:14026481-14027200	0.393844	0.0204529	0.373391	2.92564e-10	5.49449e-09		cg20819218	1	29450834	TMEM200B	chr1:29447699-29451847	0.425198	0.145334	0.279864	1.01743e-08	9.44867e-07		cg13629563	1	25256949	RUNX3	chr1:25255527-25259005	0.464082	0.120554	0.343529	2.65989e-14	2.09025e-12		AMBN|258	-2.46656	-3.23992	6.93977e-06	1.93719e-05		APBA1|320	-1.38654	2.98903	1.24e-12	2.87e-11		AKR1C4|1109	-1.42443	1.11748	2.96e-05	8.27e-05
cg09765994	1	14026605	PRDM2	chr1:14026481-14027200	0.395899	0.0192937	0.376606	1.50603e-09	2.39641e-08		cg11296230	1	29450836	TMEM200B	chr1:29447699-29451847	0.463332	0.158386	0.304946	1.75727e-08	1.42642e-06		cg22737001	1	25257029	RUNX3	chr1:25255527-25259005	0.495146	0.120581	0.374565	7.19922e-16	9.74323e-14		AMELX|265	-1.64526	-1.39393	8.14332e-09	3.23378e-08		APBB1IP|54518	1.08248	2.56652	4.39e-10	5.87e-09		AKR1D1|6718	-4.86274	-0.974618	6.11e-10	3.31e-09
cg07596209	1	14026618	PRDM2	chr1:14026481-14027200	0.28732	0.0152103	0.27211	9.41428e-08	9.75923e-07		cg16117248	1	29451235	TMEM200B	chr1:29447699-29451847	0.349644	0.0510014	0.298643	1.14154e-07	6.08149e-06		cg26421310	1	25257058	RUNX3	chr1:25255527-25259005	0.524232	0.168676	0.355556	2.13897e-17	5.17156e-15		AMH|268	2.02081	1.44508	8.87728e-17	7.49385e-16		APC2|10297	1.16873	0.850715	4.86e-07	3.53e-06		AKT3|10000	-1.22521	3.86118	5.75e-25	1.98e-23
cg09826587	1	14026817	PRDM2	chr1:14026481-14027200	0.280633	0.0265429	0.25409	5.43744e-08	5.96406e-07		cg04596632	1	29451471	TMEM200B	chr1:29447699-29451847	0.384094	0.11968	0.264414	1.40124e-08	1.19881e-06		cg26672794	1	25257131	RUNX3	chr1:25255527-25259005	0.556002	0.152231	0.403771	2.37281e-16	3.76359e-14		AMT|275	-1.87235	4.04353	1.07114e-24	1.61112e-23		APCDD1|147495	-1.0779	5.83835	0.00025148	0.0009743		ALAS2|212	-1.24926	-2.12044	0.00182141	0.00382557
cg27544000	1	17034075	ESPNP	chr1:17033768-17034728	0.311589	0.0328812	0.278708	5.7805e-13	2.09242e-11		cg05039004	1	29586299	PTPRU	chr1:29585897-29586598	0.367209	0.0875671	0.279642	5.42098e-09	5.858e-07		cg02970551	1	25257191	RUNX3	chr1:25255527-25259005	0.432089	0.122794	0.309295	7.59099e-20	5.03678e-17		AMZ1|155185	1.70761	-1.84116	6.86441e-30	1.47481e-28		APCDD1L|164284	2.25013	-1.42909	1.91e-13	5.12e-12		ALB|213	-10.4108	9.14787	1.18e-15	1.31e-14
cg05055766	1	17307215	MFAP2	chr1:17306551-17307363	0.415835	0.0845031	0.331332	1.59266e-09	2.52086e-08		cg26884027	1	29586418	PTPRU	chr1:29585897-29586598	0.357096	0.0874829	0.269614	1.24083e-06	3.88126e-05		cg21406271	1	25258082	RUNX3	chr1:25255527-25259005	0.720907	0.461364	0.259544	1.41897e-17	3.70241e-15		ANGPTL4|51129	1.67417	2.99136	1.66664e-35	5.22039e-34		APLP1|333	2.44182	0.982405	1.08e-23	2.46e-21		ALDH1A3|220	-1.38069	4.9286	2.39e-21	5.32e-20
cg20796611	1	18152639	ACTL8	chr1:18152378-18152842	0.587843	0.327535	0.260308	5.6951e-16	4.72887e-14		cg05536984	1	32083535	HCRTR1	chr1:32083149-32084069	0.53555	0.185291	0.350259	8.94742e-11	3.04769e-08		cg26256263	1	25258146	RUNX3	chr1:25255527-25259005	0.766947	0.512948	0.253999	1.31489e-14	1.15609e-12		ANK1|286	1.55906	0.970132	1.89306e-15	1.4219e-14		APOA4|337	4.26754	-2.19806	2.41e-09	2.8e-08		ALDH8A1|64577	-1.59373	0.430793	9.99e-07	3.47e-06
cg04128045	1	18435700	IGSF21	chr1:18435566-18435904	0.434845	0.181709	0.253136	2.19721e-12	6.83776e-11		cg20608783	1	32220189	BAI2	chr1:32221887-32222107	0.674716	0.250017	0.424699	5.56113e-15	6.04054e-11		cg05625889	1	25944100	MAN1C1	chr1:25944099-25944772	0.33984	0.0276405	0.312199	7.62517e-09	1.31037e-07		ANKK1|255239	-1.18399	-1.23052	4.06761e-08	1.49584e-07		APOB48R|55911	-1.23122	5.85155	2.88e-11	4.95e-10		ALK|238	2.25861	-1.12282	5.34e-11	3.3e-10
cg19585156	1	18436490	IGSF21	chr1:18436551-18437673	0.615563	0.2257	0.389863	1.21463e-16	1.21453e-14		cg11189532	1	33351946	HPCA	chr1:33351686-33352397	0.481311	0.113233	0.368078	7.33207e-11	2.68525e-08		cg05670408	1	25944102	MAN1C1	chr1:25944099-25944772	0.349906	0.0557311	0.294175	7.88409e-09	1.34965e-07		ANKRD1|27063	2.31232	-2.30857	3.08992e-17	2.69109e-16		APOBEC1|339	-1.33675	2.96581	1.66e-08	1.62e-07		ALOX12B|242	1.26909	-0.671753	6.69e-07	2.38e-06
cg01962676	1	18436969	IGSF21	chr1:18436551-18437673	0.532461	0.172912	0.359549	3.30837e-15	2.20265e-13		cg13306164	1	33352184	HPCA	chr1:33351686-33352397	0.454252	0.061526	0.392725	2.45858e-10	6.01871e-08		cg10706230	1	25944514	MAN1C1	chr1:25944099-25944772	0.519864	0.112302	0.407562	9.00911e-17	1.68828e-14		ANKRD34B|340120	-2.23959	-2.77246	9.57017e-06	2.62386e-05		APOBEC3D|140564	1.08483	2.5185	3.09e-10	4.25e-09		ALOXE3|59344	1.789	-1.03105	7.28e-13	5.65e-12
cg27114640	1	18437320	IGSF21	chr1:18436551-18437673	0.512991	0.232972	0.280019	1.33234e-13	5.72348e-12		cg19830541	1	33352204	HPCA	chr1:33351686-33352397	0.49559	0.145449	0.350141	3.59398e-11	1.68915e-08		cg16836311	1	25944712	MAN1C1	chr1:25944099-25944772	0.842045	0.488097	0.353948	6.4413e-19	2.95168e-16		ANKRD43|134548	-1.31164	4.48269	1.00015e-23	1.39723e-22		APOBEC3G|60489	1.79154	3.60732	3.06e-20	3.32e-18		ALPK3|57538	-1.26258	4.37789	6.55e-09	3.1e-08
cg25020286	1	18956947	PAX7	chr1:18956895-18959829	0.657414	0.403439	0.253975	1.14167e-12	3.82265e-11		cg13870776	1	33352269	HPCA	chr1:33351686-33352397	0.392502	0.0451389	0.347363	7.50381e-11	2.72362e-08		cg16585234	1	25944802	MAN1C1	chr1:25942661-25943191	0.652698	0.393302	0.259397	1.51709e-15	1.84493e-13		ANKRD45|339416	1.67286	-1.84721	8.20723e-13	4.81854e-12		APOBEC3H|164668	1.57133	-0.987816	1.88e-12	4.18e-11		ALPPL2|251	1.30526	2.73958	0.00042254	0.00098913
cg11428724	1	18957632	PAX7	chr1:18956895-18959829	0.603325	0.28741	0.315914	7.89586e-21	2.54749e-18		cg25772827	1	34632573	C1orf94;CSMD2	chr1:34628783-34630976	0.631086	0.337297	0.293788	1.68973e-07	8.27583e-06		cg05674944	1	26372290	SLC30A2	chr1:26372281-26373313	0.389463	0.117894	0.271569	1.68149e-10	4.21705e-09		ANO1|55107	2.18224	5.25672	1.17915e-50	1.0025e-48		APOC1|341	2.0862	4.60455	2.97e-20	3.24e-18		ALX1|8092	-2.32349	-2.37114	1.08e-05	3.25e-05
cg09366342	1	18963194	PAX7	chr1:18962842-18963481	0.550774	0.291094	0.25968	7.80793e-13	2.72702e-11		cg26228266	1	35351340	DLGAP3	chr1:35350878-35351854	0.58319	0.299578	0.283612	1.48816e-05	0.000274491		cg02397727	1	26372300	SLC30A2	chr1:26372281-26373313	0.410664	0.139625	0.271038	1.98765e-10	4.9126e-09		ANO3|63982	-1.25841	-2.86925	0.000478889	0.00102581		APOC1P1|342	2.59621	-1.23637	1.35e-05	7.15e-05		AMACR|23600	-1.24538	6.08243	2.13e-17	2.9e-16
cg13207345	1	18963670	PAX7	chr1:18964180-18964401	0.58959	0.329285	0.260305	7.24892e-11	1.56768e-09		cg22851880	1	36038701	TFAP2E	chr1:36038927-36040051	0.575873	0.28771	0.288162	1.23882e-11	8.1644e-09		cg02924562	1	26372469	SLC30A2	chr1:26372281-26373313	0.448972	0.0550065	0.393965	5.86688e-13	2.92572e-11		ANO9|338440	-1.58828	7.09375	1.04496e-40	4.50645e-39		APOC2|344	1.12697	1.95531	1.28e-06	8.46e-06		AMBN|258	-4.4693	-2.3114	1.39e-09	7.2e-09
cg06220449	1	18964400	PAX7	chr1:18964180-18964401	0.509664	0.258801	0.250863	2.00383e-20	5.84752e-18		cg26372517	1	36039159	TFAP2E	chr1:36038927-36040051	0.474429	0.178717	0.295711	2.44773e-10	6.01224e-08		cg21957156	1	26372718	SLC30A2	chr1:26372281-26373313	0.451604	0.124455	0.327149	1.23981e-12	5.57765e-11		ANPEP|290	2.16978	6.70173	7.2906e-24	1.02655e-22		APOE|348	2.48007	7.06551	4.74e-29	4.68e-26		AMBP|259	-4.68303	4.85206	9.2e-16	1.04e-14
cg01797257	1	18969652	PAX7	chr1:18969548-18970739	0.632644	0.235288	0.397356	7.16093e-21	2.33607e-18		cg14962509	1	36039655	TFAP2E	chr1:36038927-36040051	0.814049	0.475204	0.338845	1.81174e-09	2.59064e-07		cg07766612	1	26372887	SLC30A2	chr1:26372281-26373313	0.588168	0.165766	0.422402	2.00425e-20	1.77582e-17		ANTXR2|118429	1.29736	5.98265	3.33609e-50	2.75752e-48		APOF|319	1.92079	-2.74037	0.00038074	0.00141054		AMELX|265	-1.84689	-1.37452	8.63e-08	3.45e-07
cg07221967	1	18969717	PAX7	chr1:18969548-18970739	0.427932	0.116887	0.311045	4.82126e-13	1.78463e-11		cg12789062	1	38512663	POU3F1	chr1:38510102-38513642	0.430666	0.133043	0.297623	1.37347e-08	1.18174e-06		cg00703260	1	26372895	SLC30A2	chr1:26372281-26373313	0.585364	0.137218	0.448146	3.37909e-18	1.151e-15		ANXA1|301	1.67758	6.08333	2.13171e-43	1.14637e-41		APOH|350	1.04606	-0.591212	0.00478292	0.0131716		AMH|268	2.05752	1.66014	1.42e-13	1.21e-12
cg22614355	1	19991237	HTR6	chr1:19991146-19992788	0.338843	0.0505104	0.288332	3.53201e-10	6.51317e-09		cg17412602	1	38512829	POU3F1	chr1:38510102-38513642	0.426334	0.11196	0.314374	1.80879e-08	1.45815e-06		cg10501085	1	26373132	SLC30A2	chr1:26372281-26373313	0.522072	0.227992	0.294079	1.32563e-14	1.16313e-12		ANXA10|11199	6.33691	0.992228	1.06884e-50	9.13068e-49		APOL2|23780	1.07606	5.73237	1.06e-17	6.34e-16		AMIGO2|347902	-1.07712	5.11786	4.2e-12	2.98e-11
cg03321592	1	19991676	HTR6	chr1:19991146-19992788	0.590004	0.127002	0.463002	2.35981e-14	1.24609e-12		cg27537203	1	38513245	POU3F1	chr1:38510102-38513642	0.481944	0.0988101	0.383133	3.674e-10	8.0492e-08		cg18303360	1	26373288	SLC30A2	chr1:26372281-26373313	0.612665	0.273582	0.339083	2.29962e-15	2.64979e-13		ANXA8|653145	3.36115	-0.470111	2.51547e-37	8.84079e-36		APOL3|80833	1.23038	4.9416	2.37e-13	6.25e-12		AMOTL1|154810	-1.37335	4.7868	1.98e-24	6.52e-23
cg01468656	1	19991678	HTR6	chr1:19991146-19992788	0.576492	0.201004	0.375488	4.61249e-14	2.24185e-12		cg21270860	1	38513318	POU3F1	chr1:38510102-38513642	0.478979	0.192766	0.286213	5.56448e-11	2.24166e-08		cg26616083	1	26736154	LIN28	chr1:26737246-26738148	0.50922	0.249581	0.259639	2.02805e-10	5.00023e-09		ANXA8L2|244	3.54444	-0.730924	1.8197e-43	9.81539e-42		APOLD1|81575	-1.36143	4.43574	1.22e-11	2.26e-10		AMPH|273	-1.83105	1.06071	1.41e-20	2.82e-19
cg11247289	1	19991707	HTR6	chr1:19991146-19992788	0.309668	0.0576706	0.251997	5.61995e-09	7.80026e-08		cg26906273	1	39547881	MACF1	chr1:39547013-39547959	0.596125	0.305362	0.290763	2.26815e-07	1.03888e-05		cg27391649	1	26737199	LIN28	chr1:26737246-26738148	0.556677	0.284234	0.272443	9.00584e-09	1.5224e-07		AOAH|313	-1.91601	4.53591	1.18177e-39	4.74143e-38		AQP2|359	1.30034	-2.58394	0.00080499	0.00272661		AMT|275	-1.45727	3.58601	1.05e-13	9.09e-13
cg27549720	1	19992167	HTR6	chr1:19991146-19992788	0.821279	0.545797	0.275482	1.22932e-16	1.22712e-14		cg20286956	1	39547918	MACF1	chr1:39547013-39547959	0.829866	0.545154	0.284711	3.35979e-09	4.11394e-07		cg18634211	1	26737262	LIN28	chr1:26737246-26738148	0.618506	0.359806	0.2587	2.11765e-09	4.12854e-08		AOC2|314	1.09625	-0.812178	6.89149e-17	5.86746e-16		AQP5|362	3.30252	3.72028	4.05e-10	5.45e-09		ANGPT1|284	-1.15101	1.85903	1.09e-13	9.49e-13
cg03056854	1	20005414	HTR6	chr1:20005510-20005865	0.732557	0.472122	0.260435	7.59055e-10	1.29163e-08		cg05720261	1	40105304	HEYL	chr1:40105010-40105707	0.391824	0.105549	0.286275	1.26754e-08	1.11835e-06		cg19706817	1	26737272	LIN28	chr1:26737246-26738148	0.612349	0.361184	0.251165	8.86106e-12	3.10519e-10		APBB1IP|54518	1.395	2.15006	5.9596e-28	1.12121e-26		AQP9|366	1.93937	2.77718	4.33e-11	7.2e-10		ANGPT4|51378	-1.23997	-3.31258	5.2e-06	1.64e-05
cg09511914	1	20878928	FAM43B	chr1:20878894-20880592	0.537607	0.239643	0.297964	1.66442e-19	3.6952e-17		cg23037132	1	40105664	HEYL	chr1:40105010-40105707	0.336469	0.0770311	0.259438	1.61553e-09	2.37611e-07		cg26040332	1	27960788	FGR	chr1:27960567-27961023	0.538226	0.122294	0.415932	8.16413e-15	7.71125e-13		APC2|10297	1.35503	0.485992	9.3626e-16	7.22073e-15		AQPEP|206338	1.12829	-2.58669	1.12e-05	6.03e-05		ANGPTL1|9068	-2.19991	1.65318	4.29e-16	5e-15
cg15613048	1	21044031	KIF17	chr1:21043832-21044771	0.483764	0.104154	0.379611	4.74563e-15	3.03286e-13		cg17449954	1	40105667	HEYL	chr1:40105010-40105707	0.587347	0.210529	0.376818	1.37245e-09	2.1023e-07		cg26801631	1	27961017	FGR	chr1:27960567-27961023	0.513353	0.142098	0.371255	1.41895e-15	1.74777e-13		APCDD1|147495	-2.14058	7.06805	4.13623e-18	3.86236e-17		ARC|23237	1.2066	0.676276	0.00023979	0.00093471		ANGPTL2|23452	-1.03698	6.46642	4.33e-18	6.36e-17
cg09793172	1	21044101	KIF17	chr1:21043832-21044771	0.518212	0.188482	0.32973	4.33226e-26	4.9246e-23		cg17602126	1	40105687	HEYL	chr1:40105010-40105707	0.634188	0.330238	0.30395	2.22698e-08	1.71238e-06		cg00338002	1	28198813	C1orf38	chr1:28199031-28199257	0.600205	0.27525	0.324954	1.21095e-13	7.55622e-12		APCDD1L|164284	1.23945	-1.47404	3.85145e-08	1.42133e-07		ARHGAP10|79658	1.60032	3.21489	7.16e-19	5.46e-17		ANGPTL3|27329	-6.75389	0.660256	2.29e-15	2.47e-14
cg08890418	1	21044141	KIF17	chr1:21043832-21044771	0.558875	0.0882502	0.470625	3.33474e-15	2.21668e-13		cg12160637	1	40105706	HEYL	chr1:40105010-40105707	0.488378	0.215415	0.272963	2.55989e-09	3.33965e-07		cg02447380	1	28919300	RAB42	chr1:28919041-28919454	0.407508	0.0523998	0.355108	1.71266e-11	5.55069e-10		APLF|200558	-1.33582	2.00122	5.18063e-25	8.00129e-24		ARHGAP30|257106	1.00166	4.08028	9.27e-11	1.43e-09		ANGPTL5|253935	-1.26081	-3.38972	0.00016851	0.00041969
cg18864674	1	21058007	SH2D5	chr1:21058006-21059366	0.463214	0.198405	0.264809	1.2082e-10	2.48012e-09		cg07317551	1	40157931	HPCAL4	chr1:40156930-40158514	0.467735	0.167712	0.300023	3.95855e-08	2.65845e-06		cg24118052	1	28919387	RAB42	chr1:28919041-28919454	0.552633	0.253971	0.298661	1.99185e-15	2.34321e-13		APLP1|333	2.35162	0.455902	2.71458e-57	3.8773e-55		ARHGAP9|64333	1.10888	3.05618	4.89e-11	8.01e-10		ANGPTL7|10218	-2.90768	-1.55393	8.55e-17	1.09e-15
cg23841903	1	21058444	SH2D5	chr1:21058006-21059366	0.42676	0.037351	0.389408	3.06565e-12	9.20908e-11		cg00068503	1	40782713	COL9A2	chr1:40782220-40783145	0.556149	0.25262	0.303529	4.70254e-10	9.5907e-08		cg08366446	1	29138936	OPRD1	chr1:29138501-29139348	0.489406	0.141148	0.348258	1.15748e-08	1.90655e-07		APOA2|336	-2.01976	0.106146	0.000148916	0.000344844		ARHGEF33|100271715	1.11703	-1.75621	7.57e-05	0.00033434		ANK1|286	1.19473	1.27269	6.37e-11	3.9e-10
cg04902671	1	21058625	SH2D5	chr1:21058006-21059366	0.331998	0.0284138	0.303585	4.07597e-11	9.35429e-10		cg24686358	1	40782785	COL9A2	chr1:40782220-40783145	0.599784	0.31364	0.286143	5.95955e-08	3.65418e-06		cg19715410	1	29139021	OPRD1	chr1:29138501-29139348	0.509113	0.209596	0.299518	4.68784e-10	1.06329e-08		APOA4|337	1.83595	-2.25657	5.74182e-05	0.000141107		ARL4C|10123	1.57343	5.30055	1.89e-21	2.66e-19		ANK2|287	-1.81634	2.82351	3.92e-22	9.48e-21
cg03472655	1	21058966	SH2D5	chr1:21058006-21059366	0.43789	0.09081	0.34708	1.62873e-10	3.2459e-09		cg26710722	1	40782991	COL9A2	chr1:40782220-40783145	0.457609	0.17612	0.281489	2.29841e-08	1.75859e-06		cg25840576	1	29447971	TMEM200B	chr1:29447699-29451847	0.533334	0.249097	0.284237	6.26631e-13	3.09771e-11		APOBEC3D|140564	1.25791	2.17499	8.96157e-26	1.44927e-24		ARRDC5|645432	1.11533	-2.79027	5.49e-05	0.00025068		ANKLE1|126549	-1.43777	0.0755885	2.72e-09	1.35e-08
cg26840598	1	21059114	SH2D5	chr1:21058006-21059366	0.400911	0.0275046	0.373407	6.20449e-11	1.3623e-09		cg15976404	1	42619118	GUCA2B		0.761865	0.509852	0.252014	1.88808e-09	2.67399e-07		cg03315764	1	29448425	TMEM200B	chr1:29447699-29451847	0.463273	0.0989824	0.364291	1.22646e-13	7.63103e-12		APOBEC3F|200316	1.09983	2.81544	9.05166e-26	1.46252e-24		ARSI|340075	1.98271	1.06836	1.78e-21	2.54e-19		ANKRD2|26287	-1.58685	-2.98958	1.37e-07	5.33e-07
cg05704196	1	21059189	SH2D5	chr1:21058006-21059366	0.37019	0.0619074	0.308283	5.56435e-10	9.78704e-09		cg04877567	1	44584446	KLF17		0.787078	0.516056	0.271022	6.76963e-06	0.000147908		cg08706732	1	29448625	TMEM200B	chr1:29447699-29451847	0.387495	0.0546608	0.332834	4.1057e-13	2.1475e-11		APOBEC3G|60489	1.90063	3.12902	6.72507e-55	7.84767e-53		ART4|420	1.01365	-2.87571	0.0178853	0.0408614		ANKRD34B|340120	-1.97595	-2.96847	3.52e-06	1.13e-05
cg07717763	1	21059365	SH2D5	chr1:21058006-21059366	0.363771	0.0779364	0.285835	5.98809e-11	1.31993e-09		cg19711800	1	44718245	ERI3		0.836019	0.577599	0.25842	1.59109e-16	5.83287e-12		cg22698996	1	29449036	TMEM200B	chr1:29447699-29451847	0.291858	0.0409384	0.25092	3.11745e-11	9.44497e-10		APOBEC3H|164668	1.74195	-1.38181	1.18679e-29	2.51054e-28		ASAM|79827	1.43434	1.62415	6.6e-15	2.39e-13		ANKRD35|148741	-1.26495	0.524902	4.32e-21	9.28e-20
cg17015803	1	21835620	ALPL	chr1:21835548-21836344	0.381303	0.0896913	0.291612	3.14013e-11	7.40769e-10		cg16681083	1	44727237	ERI3		0.698756	0.36932	0.329437	3.19761e-11	1.5475e-08		cg10165585	1	29449042	TMEM200B	chr1:29447699-29451847	0.54926	0.144225	0.405035	2.48419e-13	1.39383e-11		APOC1|341	1.94526	4.17075	4.57528e-37	1.57697e-35		ASB12|142689	-1.48751	-1.66631	4.86e-08	4.33e-07		ANKRD53|79998	-1.05162	-1.4961	3.77e-08	1.6e-07
cg13554489	1	21835685	ALPL	chr1:21835548-21836344	0.400874	0.0806043	0.32027	6.18028e-12	1.71641e-10		cg20820767	1	45082840	RNF220	chr1:45082739-45083285	0.648144	0.311328	0.336815	7.38645e-11	2.69436e-08		cg07556059	1	29449513	TMEM200B	chr1:29447699-29451847	0.481045	0.22106	0.259985	1.3051e-19	7.87562e-17		APOC1P1|342	1.89036	-1.55304	1.81245e-06	5.44588e-06		ASB4|51666	1.43439	-1.25948	0.00310243	0.00900982		ANKRD55|79722	-1.01288	-2.30204	2.8e-05	7.86e-05
cg07162257	1	21835692	ALPL	chr1:21835548-21836344	0.44312	0.0773591	0.365761	1.91832e-11	4.74886e-10		cg10329345	1	45083079	RNF220	chr1:45082739-45083285	0.858776	0.589253	0.269523	1.16625e-07	6.17945e-06		cg08467760	1	29449845	TMEM200B	chr1:29447699-29451847	0.558303	0.14991	0.408393	3.78473e-17	8.22811e-15		APOC3|345	-2.59858	-2.94878	1.40444e-05	3.76386e-05		ASPN|54829	1.42655	3.01357	1.23e-10	1.85e-09		ANKRD6|22881	-1.23232	1.71716	2.58e-17	3.49e-16
cg22154616	1	21835703	ALPL	chr1:21835548-21836344	0.416414	0.0790405	0.337374	1.3004e-11	3.34305e-10		cg13189207	1	45083124	RNF220	chr1:45082739-45083285	0.682434	0.420951	0.261483	4.10149e-09	4.75994e-07		cg08258259	1	29450102	TMEM200B	chr1:29447699-29451847	0.55246	0.0773736	0.475086	1.35781e-16	2.37172e-14		APOE|348	2.28047	6.55485	2.80429e-48	2.09489e-46		ATOH1|474	-1.35918	4.17371	8.02e-06	4.46e-05		ANO3|63982	-2.73706	-2.10865	1.15e-16	1.43e-15
cg25138553	1	22223841	HSPG2		0.515651	0.206092	0.309559	2.74937e-11	6.56724e-10		cg20944964	1	45083207	RNF220	chr1:45082739-45083285	0.574737	0.311355	0.263382	2.17361e-10	5.55957e-08		cg05124308	1	29450569	TMEM200B	chr1:29447699-29451847	0.505219	0.133978	0.371241	5.7044e-16	7.93627e-14		APOF|319	2.59177	-3.11923	3.16323e-13	1.93346e-12		ATOH8|84913	-2.32644	2.70875	4.39e-23	8.49e-21		ANTXR1|84168	-1.60341	7.64571	8.34e-31	6.99e-29
cg26870337	1	22777672	ZBTB40	chr1:22778236-22778817	0.937214	0.651899	0.285315	3.54556e-26	4.09381e-23		cg04108939	1	45250181	BEST4	chr1:45249860-45250352	0.411824	0.129637	0.282187	7.63479e-07	2.64857e-05		cg19716902	1	29450584	TMEM200B	chr1:29447699-29451847	0.540015	0.0655013	0.474514	1.6315e-15	1.96179e-13		APOL1|8542	1.67112	6.96611	5.92857e-32	1.44998e-30		ATP10A|57194	1.36156	1.9763	5.88e-16	2.53e-14		ANXA10|11199	2.3492	1.78911	4e-06	1.28e-05
cg22685052	1	22777719	ZBTB40	chr1:22778236-22778817	0.951276	0.530972	0.420303	3.26047e-32	1.18052e-28		cg10380348	1	47691158	TAL1	chr1:47690980-47691727	0.606732	0.353613	0.253119	7.20467e-08	4.24545e-06		cg23905374	1	29450643	TMEM200B	chr1:29447699-29451847	0.491468	0.0761319	0.415336	7.34113e-16	9.90811e-14		APOL2|23780	1.48498	5.26539	1.27975e-53	1.34404e-51		ATP10B|23120	-1.09231	7.54011	1.11e-09	1.38e-08		ANXA8|653145	-2.3807	2.99169	1e-06	3.49e-06
cg09266979	1	22777744	ZBTB40	chr1:22778236-22778817	0.893797	0.500982	0.392815	7.34575e-41	1.95848e-36		cg10810752	1	47691160	TAL1	chr1:47690980-47691727	0.57308	0.277249	0.295832	1.46585e-07	7.3777e-06		cg13548601	1	29450729	TMEM200B	chr1:29447699-29451847	0.498561	0.0772355	0.421326	9.85103e-14	6.31905e-12		APOL3|80833	1.88149	4.33625	2.2489e-61	3.93646e-59		ATP12A|479	-4.4113	-0.14945	7.94e-14	2.3e-12		ANXA8L2|244	-1.72871	2.13927	6.61e-05	0.00017577
cg21415347	1	22777839	ZBTB40	chr1:22778236-22778817	0.880667	0.561502	0.319165	1.79497e-27	2.69959e-24		cg00955828	1	47691301	TAL1	chr1:47690980-47691727	0.539573	0.221863	0.31771	2.37475e-09	3.16572e-07		cg20819218	1	29450834	TMEM200B	chr1:29447699-29451847	0.425198	0.0840343	0.341164	3.58894e-12	1.40715e-10		APOL4|80832	1.73979	3.18277	3.35374e-42	1.62711e-40		ATP1A3|478	2.77377	2.60634	1.89e-17	1.09e-15		AOAH|313	-1.59184	4.14894	1.46e-23	4.31e-22
cg11847808	1	22889611	EPHA8	chr1:22889595-22890096	0.667218	0.385025	0.282193	4.69267e-14	2.27742e-12		cg06955484	1	47695408	TAL1	chr1:47696504-47698197	0.574243	0.294032	0.280211	1.68406e-09	2.44866e-07		cg11296230	1	29450836	TMEM200B	chr1:29447699-29451847	0.463332	0.0905172	0.372814	3.5576e-12	1.39748e-10		APOL6|80830	1.0881	6.53602	3.99727e-46	2.65269e-44		ATP2A1|487	1.51966	0.679622	3.21e-11	5.46e-10		AOC3|8639	-1.80392	5.69687	7.02e-29	4.35e-27
cg11801107	1	22889721	EPHA8	chr1:22889595-22890096	0.533201	0.202782	0.330419	1.23344e-17	1.60274e-15		cg19809499	1	47882265	FOXE3	chr1:47881896-47883065	0.464277	0.133139	0.331139	7.92018e-09	7.79201e-07		cg16117248	1	29451235	TMEM200B	chr1:29447699-29451847	0.349644	0.0396909	0.309953	3.9863e-08	5.86538e-07		APOLD1|81575	-2.32456	5.64071	1.16727e-27	2.15739e-26		ATP6V0A4|50617	1.78371	-1.56569	0.00020867	0.00082738		AOX1|316	-3.15332	3.33738	5.44e-25	1.89e-23
cg10838091	1	22889780	EPHA8	chr1:22889595-22890096	0.508909	0.243896	0.265013	5.31364e-19	1.03849e-16		cg18815943	1	47882314	FOXE3	chr1:47881896-47883065	0.373626	0.120349	0.253277	2.14882e-08	1.66499e-06		cg04596632	1	29451471	TMEM200B	chr1:29447699-29451847	0.384094	0.0922329	0.291861	6.72444e-10	1.4691e-08		AQP10|89872	1.74731	-3.28354	4.59603e-09	1.86962e-08		ATP6V1B1|525	1.23617	-0.922489	1.17e-05	6.28e-05		APBB1|322	-1.63739	3.51609	4.73e-40	2.97e-37
cg07952381	1	23040723	EPHB2	chr1:23036823-23038362	0.652047	0.321673	0.330374	1.29887e-14	7.36235e-13		cg15457058	1	47882322	FOXE3	chr1:47881896-47883065	0.377844	0.110184	0.26766	5.20795e-08	3.28678e-06		cg05039004	1	29586299	PTPRU	chr1:29585897-29586598	0.367209	0.109075	0.258134	2.49827e-08	3.83062e-07		AQP2|359	2.28708	-3.00284	2.39823e-17	2.10615e-16		ATP8B3|148229	1.58299	0.216943	1.8e-15	7.28e-14		APCDD1|147495	-1.48385	6.38415	1.47e-09	7.57e-09
cg25977026	1	23347412	KDM1A	chr1:23345814-23346677	0.83998	0.509911	0.33007	3.04266e-18	4.79495e-16		cg19030579	1	50888710	DMRTA2	chr1:50884228-50891471	0.512886	0.250676	0.262209	4.53551e-07	1.7693e-05		cg08847173	1	31654792	NKAIN1	chr1:31654422-31654833	0.561021	0.243923	0.317098	1.47374e-09	2.97196e-08		AQP3|360	2.2103	4.5712	4.12616e-49	3.24531e-47		ATP9A|10079	-1.0074	7.1013	8.81e-16	3.69e-14		APCDD1L|164284	-1.31619	0.124681	2.98e-09	1.47e-08
cg26530485	1	23496304	LUZP1		0.423329	0.151756	0.271573	1.56758e-11	3.95547e-10		cg26560222	1	50888826	DMRTA2	chr1:50884228-50891471	0.49207	0.240293	0.251776	7.78272e-06	0.00016523		cg11573219	1	32083031	HCRTR1	chr1:32083149-32084069	0.653258	0.402295	0.250963	4.06276e-12	1.56778e-10		AQP5|362	5.47769	2.76726	2.04844e-68	5.45864e-66		AUTS2|26053	-1.23416	5.8319	6.79e-17	3.52e-15		APCS|325	-10.6154	2.15458	1.05e-13	9.12e-13
cg21523719	1	24128335	GALE	chr1:24126799-24127549	0.769022	0.452287	0.316736	5.65194e-22	2.4926e-19		cg06921573	1	50889128	DMRTA2	chr1:50884228-50891471	0.41974	0.163777	0.255963	9.67093e-10	1.62629e-07		cg05536984	1	32083535	HCRTR1	chr1:32083149-32084069	0.53555	0.115413	0.420137	4.96414e-14	3.52765e-12		AQP8|343	-1.85225	3.40611	2.23866e-06	6.65374e-06		AVIL|10677	-1.40569	2.0919	1.29e-08	1.29e-07		APLF|200558	-1.17041	1.78798	3.91e-19	6.59e-18
cg24699146	1	24152579	HMGCL		0.683321	0.396427	0.286894	1.79038e-13	7.43522e-12		cg11448896	1	50889182	DMRTA2	chr1:50884228-50891471	0.409314	0.147471	0.261843	3.27517e-09	4.03414e-07		cg16704678	1	32230177	BAI2	chr1:32228347-32230252	0.3115	0.0560552	0.255444	6.9408e-08	9.70752e-07		AQP9|366	2.13303	2.23131	4.04639e-33	1.08475e-31		AVPR1A|552	1.54201	-1.05931	2.04e-12	4.49e-11		APOA1|335	-6.39377	4.97735	1.11e-18	1.75e-17
cg09473613	1	24152604	HMGCL		0.738626	0.474134	0.264492	7.12993e-14	3.28779e-12		cg00152008	1	50889225	DMRTA2	chr1:50884228-50891471	0.469647	0.15589	0.313758	5.75013e-10	1.11626e-07		cg10316989	1	32930168	ZBTB8B	chr1:32930500-32931061	0.367953	0.107997	0.259956	1.6127e-08	2.57494e-07		AQPEP|206338	1.00736	-2.70184	7.63578e-08	2.71302e-07		AXIN2|8313	-1.89296	7.11872	1.35e-22	2.35e-20		APOA2|336	-6.59486	4.33805	1.73e-12	1.29e-11
cg04460567	1	24193498	FUCA1	chr1:24194254-24194990	0.773578	0.402998	0.37058	6.50945e-20	1.62335e-17		cg27265170	1	50889510	DMRTA2	chr1:50884228-50891471	0.398204	0.126393	0.271811	3.03697e-08	2.17025e-06		cg09146263	1	32930375	ZBTB8B	chr1:32930500-32931061	0.545261	0.28839	0.256871	1.31616e-13	8.10159e-12		ARC|23237	1.91343	0.0636215	5.79059e-18	5.34291e-17		AXL|558	1.20842	4.50904	7.73e-19	5.85e-17		APOA4|337	-1.61898	-0.234723	0.023717	0.039574
cg26873754	1	24193728	FUCA1	chr1:24194254-24194990	0.62315	0.347422	0.275728	3.43166e-13	1.32302e-11		cg18198999	1	50890153	DMRTA2	chr1:50884228-50891471	0.456768	0.153236	0.303532	1.0424e-08	9.6257e-07		cg13666729	1	32930473	ZBTB8B	chr1:32930500-32931061	0.517592	0.249428	0.268164	1.0167e-12	4.71346e-11		AREG|374	-1.88249	6.69109	4.32871e-25	6.72042e-24		B3GALT1|8708	-1.0959	-0.650571	0.00183008	0.00564488		APOA5|116519	-6.45729	0.201904	5.26e-13	4.17e-12
cg26404511	1	24229575	CNR2	chr1:24229115-24229537	0.539933	0.234802	0.305131	9.88825e-15	5.7965e-13		cg16321293	1	51312091	FAF1		0.92154	0.625872	0.295668	7.09942e-08	4.19438e-06		cg09768093	1	32930511	ZBTB8B	chr1:32930500-32931061	0.596147	0.311536	0.284611	4.37198e-12	1.67367e-10		ARFGEF2|10564	-1.00734	7.11871	6.70549e-45	4.03097e-43		B3GAT1|27087	1.64114	-0.756291	4.37e-10	5.85e-09		APOB|338	-5.09899	5.0134	3.41e-12	2.45e-11
cg07967717	1	24229682	CNR2	chr1:24229115-24229537	0.559938	0.286119	0.273819	7.24373e-16	5.85136e-14		cg12278631	1	51312119	FAF1		0.932034	0.639912	0.292122	2.83057e-07	1.22929e-05		cg22604123	1	32930522	ZBTB8B	chr1:32930500-32931061	0.559204	0.261985	0.297219	1.0684e-12	4.91045e-11		ARHGAP10|79658	1.42719	2.918	3.34031e-29	6.85494e-28		B3GNT6|192134	-2.78532	5.08711	3.38e-13	8.6e-12		APOBEC3G|60489	1.02583	3.6828	1.8e-13	1.5e-12
cg00117172	1	25255838	RUNX3	chr1:25255527-25259005	0.528127	0.218165	0.309962	1.9659e-09	3.03975e-08		cg01394819	1	53527665	PODN	chr1:53527572-53528974	0.74728	0.464695	0.282584	6.76423e-06	0.000147858		cg22007227	1	32930544	ZBTB8B	chr1:32930500-32931061	0.510055	0.218087	0.291968	5.0394e-11	1.43698e-09		ARHGAP25|9938	1.05897	2.47432	3.1534e-24	4.54772e-23		B4GALNT2|124872	-1.91624	2.54922	9.55e-06	5.23e-05		APOC2|344	-2.02199	4.01472	9.41e-14	8.24e-13
cg19590532	1	25255920	RUNX3	chr1:25255527-25259005	0.523918	0.107099	0.416819	1.03394e-14	6.02485e-13		cg13764106	1	53527693	PODN	chr1:53527572-53528974	0.645407	0.384015	0.261392	3.69126e-06	9.17273e-05		cg00987080	1	32930837	ZBTB8B	chr1:32930500-32931061	0.635601	0.315903	0.319697	3.72376e-14	2.7718e-12		ARHGAP30|257106	1.31489	3.68086	2.18118e-31	5.17855e-30		BAI2|576	1.17249	2.04419	2.25e-07	1.76e-06		APOC3|345	-10.1421	3.42081	2.06e-14	1.95e-13
cg06377278	1	25256369	RUNX3	chr1:25255527-25259005	0.460963	0.0332417	0.427721	1.63666e-14	9.03602e-13		cg20793071	1	54520450	C1orf83;TMEM59	chr1:54518601-54519299	0.543001	0.29252	0.250481	6.08884e-09	6.37526e-07		cg11619390	1	32931179	ZBTB8B	chr1:32930500-32931061	0.632025	0.372746	0.259279	5.3572e-14	3.7632e-12		ARHGAP9|64333	1.41051	2.63874	2.31503e-30	5.15368e-29		BATF2|116071	1.1148	5.53204	3.41e-12	7.2e-11		APOC4|346	-5.08612	-0.476456	2.19e-14	2.06e-13
cg11018723	1	25256939	RUNX3	chr1:25255527-25259005	0.479562	0.0575703	0.421992	1.26854e-17	1.64196e-15		cg22537280	1	54723213	SSBP3	chr1:54723696-54724019	0.844914	0.515896	0.329018	2.25457e-09	3.04987e-07		cg24417499	1	33351653	HPCA	chr1:33351686-33352397	0.621314	0.331637	0.289677	4.2844e-13	2.22865e-11		ARHGEF4|50649	1.42565	1.91187	7.07293e-13	4.18008e-12		BATF3|55509	1.66664	1.16729	2.14e-16	1e-14		APOD|347	-2.67798	4.8795	1.31e-26	5.61e-25
cg13629563	1	25256949	RUNX3	chr1:25255527-25259005	0.464082	0.0823333	0.381749	8.93987e-16	7.04041e-14		cg06836772	1	57110403	PRKAA2	chr1:57110663-57111337	0.577614	0.241089	0.336525	4.51639e-09	5.12529e-07		cg21604358	1	33351761	HPCA	chr1:33351686-33352397	0.467254	0.174646	0.292608	1.12694e-15	1.44388e-13		ARID3A|1820	-1.98013	4.6776	1.57313e-44	9.17864e-43		BBOX1|8424	-1.28723	-3.28078	0.00018402	0.00073837		APOF|319	-3.56309	0.253408	4.99e-06	1.57e-05
cg22737001	1	25257029	RUNX3	chr1:25255527-25259005	0.495146	0.0813604	0.413786	2.51538e-17	3.02337e-15		cg09763175	1	57110722	PRKAA2	chr1:57110663-57111337	0.473849	0.163173	0.310676	3.51288e-07	1.4527e-05		cg14119350	1	33351904	HPCA	chr1:33351686-33352397	0.428494	0.112672	0.315821	6.35702e-13	3.13285e-11		ARL11|115761	-1.99647	2.63247	6.48993e-25	9.94603e-24		BCAR4|400500	3.41239	-2.51438	8.32e-07	5.75e-06		APOH|350	-5.45739	4.59373	4.98e-15	5.08e-14
cg26421310	1	25257058	RUNX3	chr1:25255527-25259005	0.524232	0.103331	0.420901	7.6757e-21	2.49015e-18		cg19083779	1	57110724	PRKAA2	chr1:57110663-57111337	0.421519	0.14752	0.273998	4.81936e-08	3.09294e-06		cg11189532	1	33351946	HPCA	chr1:33351686-33352397	0.481311	0.0381273	0.443183	3.63137e-14	2.7139e-12		ARL4C|10123	1.45651	4.97923	1.38738e-35	4.38412e-34		BCAS1|8537	-1.54166	5.9064	1.46e-11	2.69e-10		APOL1|8542	1.20512	7.32838	6.7e-19	1.09e-17
cg26672794	1	25257131	RUNX3	chr1:25255527-25259005	0.556002	0.114863	0.441139	9.37424e-18	1.26518e-15		cg04876835	1	57111099	PRKAA2	chr1:57110663-57111337	0.568338	0.249857	0.318481	2.46055e-07	1.10379e-05		cg13306164	1	33352184	HPCA	chr1:33351686-33352397	0.454252	0.0249089	0.429343	1.80688e-11	5.82387e-10		ARL9|132946	1.3171	-1.8167	1.52294e-09	6.49872e-09		BCAT1|586	1.72164	3.24195	5.61e-28	4.33e-25		APOL2|23780	1.04929	5.6107	1.81e-27	9.03e-26
cg02970551	1	25257191	RUNX3	chr1:25255527-25259005	0.432089	0.0667886	0.365301	5.59513e-23	3.24934e-20		cg26068551	1	57111117	PRKAA2	chr1:57110663-57111337	0.621291	0.263308	0.357982	7.46887e-08	4.36661e-06		cg19830541	1	33352204	HPCA	chr1:33351686-33352397	0.49559	0.1069	0.38869	1.25685e-12	5.64307e-11		ARMC2|84071	-1.6025	1.82856	3.23271e-25	5.05401e-24		BCL2A1|597	1.80372	2.74681	3.63e-18	2.39e-16		APOLD1|81575	-2.22932	5.43505	9.75e-34	1.29e-31
cg21406271	1	25258082	RUNX3	chr1:25255527-25259005	0.720907	0.447217	0.27369	3.79843e-18	5.77795e-16		cg09686317	1	57111122	PRKAA2	chr1:57110663-57111337	0.533924	0.227204	0.306721	6.99393e-08	4.14039e-06		cg13870776	1	33352269	HPCA	chr1:33351686-33352397	0.392502	0.0257104	0.366791	1.77397e-11	5.72978e-10		ARNT2|9915	1.64779	2.72943	5.23431e-20	5.54619e-19		BEAN|146227	2.65465	0.699547	6.38e-18	4.04e-16		AQP1|358	-1.2321	6.93625	9.3e-17	1.18e-15
cg05625889	1	25944100	MAN1C1	chr1:25944099-25944772	0.33984	0.0209928	0.318847	4.54013e-09	6.43957e-08		cg09935045	1	57111199	PRKAA2	chr1:57110663-57111337	0.516184	0.259939	0.256245	3.30959e-06	8.43214e-05		cg24490542	1	34628784	CSMD2	chr1:34628783-34630976	0.568342	0.257269	0.311073	1.73394e-13	1.02339e-11		ARNTL2|56938	1.34968	3.22954	1.83943e-48	1.37988e-46		BEST2|54831	-1.4865	1.85537	0.00017238	0.00069701		AQP2|359	1.11083	-2.6749	0.00109979	0.00240113
cg05670408	1	25944102	MAN1C1	chr1:25944099-25944772	0.349906	0.048047	0.301859	4.20264e-09	6.01206e-08		cg18348836	1	60282400	HOOK1	chr1:60280624-60281048	0.718808	0.441254	0.277554	3.99862e-09	4.67397e-07		cg04272632	1	34629400	CSMD2	chr1:34628783-34630976	0.614927	0.28066	0.334268	6.30049e-16	8.67911e-14		ARRDC5|645432	1.0037	-2.88996	7.74671e-06	2.15e-05		BEST3|144453	-2.51944	-1.06868	8.56e-10	1.09e-08		AQP4|361	-1.75028	-2.57604	7.22e-05	0.00019057
cg10706230	1	25944514	MAN1C1	chr1:25944099-25944772	0.519864	0.0663318	0.453532	3.11286e-18	4.88718e-16		cg11540204	1	60391699	CYP2J2	chr1:60392272-60392583	0.742332	0.471561	0.270771	4.73824e-08	3.05275e-06		cg05817517	1	34630153	CSMD2	chr1:34628783-34630976	0.664536	0.349551	0.314985	1.1496e-13	7.21642e-12		ARSE|415	-1.27144	6.57528	5.24624e-18	4.85318e-17		BEX1|55859	-1.94918	-1.4378	2.03e-06	1.29e-05		AQP5|362	2.35988	3.51711	2.66e-08	1.15e-07
cg16836311	1	25944712	MAN1C1	chr1:25944099-25944772	0.842045	0.39735	0.444695	7.8446e-26	8.52086e-23		cg24740868	1	60539362	C1orf87	chr1:60539315-60539540	0.587149	0.296928	0.290221	1.31756e-09	2.03802e-07		cg24018609	1	34630796	CSMD2	chr1:34628783-34630976	0.448994	0.161806	0.287189	8.18943e-12	2.90313e-10		ARSI|340075	1.48162	0.8354	4.97937e-29	1.0137e-27		BEX2|84707	-1.75591	1.29314	2.05e-06	1.3e-05		AQP7|364	-1.44795	0.984275	9.02e-10	4.77e-09
cg16585234	1	25944802	MAN1C1	chr1:25942661-25943191	0.652698	0.361106	0.291592	1.38377e-17	1.77838e-15		cg00914726	1	60539400	C1orf87	chr1:60539315-60539540	0.574661	0.20718	0.36748	1.94519e-10	5.18146e-08		cg21681396	1	34630803	CSMD2	chr1:34628783-34630976	0.420906	0.146892	0.274014	5.67512e-10	1.25879e-08		ARSJ|79642	1.77218	3.13017	1.03026e-30	2.34321e-29		BGN|633	1.42007	7.64163	3.43e-18	2.27e-16		AQP8|343	-2.01138	3.44749	4.43e-06	1.4e-05
cg05674944	1	26372290	SLC30A2	chr1:26372281-26373313	0.389463	0.0795525	0.30991	4.674e-12	1.33891e-10		cg15628917	1	60539559	C1orf87	chr1:60539315-60539540	0.365335	0.115096	0.250239	5.93494e-08	3.6429e-06		cg23921342	1	34630923	CSMD2	chr1:34628783-34630976	0.533068	0.242825	0.290243	2.66629e-10	6.3964e-09		ARX|170302	3.10693	-0.701895	3.63931e-29	7.45997e-28		BHMT|635	-1.24842	-0.943905	0.0174077	0.0399139		AR|367	-1.62762	-0.762673	5.35e-11	3.3e-10
cg02397727	1	26372300	SLC30A2	chr1:26372281-26373313	0.410664	0.0943154	0.316348	2.82935e-12	8.57212e-11		cg09851465	1	60539671	C1orf87	chr1:60539315-60539540	0.510511	0.22112	0.289392	6.06324e-09	6.35966e-07		cg15654121	1	34630944	CSMD2	chr1:34628783-34630976	0.686357	0.368098	0.318259	3.15151e-11	9.53731e-10		AS3MT|57412	-2.16238	1.51998	1.99235e-26	3.41768e-25		BIRC3|330	1.21	5.56543	1.08e-11	2.03e-10		EGR2|1959	-1.06261	3.53714	3.5e-11	2.21e-10
cg02924562	1	26372469	SLC30A2	chr1:26372281-26373313	0.448972	0.0277967	0.421175	1.11154e-13	4.8713e-12		cg23049458	1	62660624	L1TD1	chr1:62660555-62660946	0.391576	0.0848193	0.306757	3.38614e-08	2.36053e-06		cg19228118	1	34631324	C1orf94;CSMD2	chr1:34628783-34630976	0.65097	0.372679	0.278291	4.10504e-12	1.5818e-10		ASB12|142689	-1.73666	-1.18451	1.07347e-15	8.22566e-15		BIRC7|79444	1.75883	-0.837045	2.45e-09	2.83e-08		ARG1|383	-5.45071	0.689238	1.42e-14	1.36e-13
cg21957156	1	26372718	SLC30A2	chr1:26372281-26373313	0.451604	0.0953652	0.356239	1.3286e-13	5.70912e-12		cg03731268	1	62660861	L1TD1	chr1:62660555-62660946	0.413569	0.124989	0.28858	1.17201e-07	6.20438e-06		cg25025247	1	34632118	C1orf94;CSMD2	chr1:34628783-34630976	0.560478	0.270834	0.289645	1.62671e-15	1.95683e-13		ASB4|51666	1.16884	-1.41675	0.000338915	0.000744644		BMP5|653	-1.56611	0.31729	1.64e-05	8.48e-05		ARHGAP11A|9824	1.03347	5.31018	2.49e-29	1.66e-27
cg07766612	1	26372887	SLC30A2	chr1:26372281-26373313	0.588168	0.0978959	0.490272	1.35714e-23	9.1498e-21		cg27424906	1	62662166	L1TD1	chr1:62660555-62660946	0.828438	0.533732	0.294706	2.0248e-10	5.31148e-08		cg25772827	1	34632573	C1orf94;CSMD2	chr1:34628783-34630976	0.631086	0.243789	0.387297	2.33724e-17	5.52787e-15		ASB5|140458	-1.80466	-2.52229	0.000158673	0.00036559		BMPER|168667	-1.30909	0.433356	7.97e-05	0.00035035		ARHGAP20|57569	-1.04613	0.495491	4.41e-11	2.75e-10
cg00703260	1	26372895	SLC30A2	chr1:26372281-26373313	0.585364	0.0857753	0.499589	4.05717e-20	1.07681e-17		cg09588271	1	62784651	KANK4	chr1:62784136-62785133	0.590639	0.115124	0.475516	1.03858e-15	2.17565e-11		cg21197216	1	34632588	C1orf94;CSMD2	chr1:34628783-34630976	0.580663	0.329347	0.251316	2.91577e-15	3.23055e-13		ASB9|140462	-1.02411	3.33995	1.69036e-10	7.93994e-10		BMPR1B|658	-2.45366	1.01278	7.46e-10	9.63e-09		ARHGAP23|57636	-1.08965	4.82824	2.87e-21	6.3e-20
cg19895786	1	26373006	SLC30A2	chr1:26372281-26373313	0.572259	0.312936	0.259324	1.03682e-14	6.03924e-13		cg07558455	1	62784762	KANK4	chr1:62784136-62785133	0.479164	0.145445	0.333719	7.18323e-12	5.72191e-09		cg18113535	1	35351185	DLGAP3	chr1:35350878-35351854	0.590927	0.257517	0.33341	1.14638e-13	7.19927e-12		ASCL2|430	-2.21383	7.27716	1.96136e-41	8.91048e-40		BMX|660	-1.93383	0.457886	6.5e-12	1.29e-10		ARHGAP28|79822	-1.63142	0.947114	1.49e-23	4.41e-22
cg10501085	1	26373132	SLC30A2	chr1:26372281-26373313	0.522072	0.185509	0.336563	3.79789e-17	4.34072e-15		cg16028201	1	62784802	KANK4	chr1:62784136-62785133	0.479539	0.0959422	0.383597	9.05885e-12	6.74301e-09		cg26228266	1	35351340	DLGAP3	chr1:35350878-35351854	0.58319	0.149231	0.433958	1.32275e-13	8.12929e-12		ASGR1|432	-1.50391	2.5573	3.63275e-12	1.99936e-11		BSN|8927	1.12078	0.162316	1.14e-05	6.15e-05		ARHGAP36|158763	-3.45067	-2.039	2.04e-11	1.33e-10
cg18303360	1	26373288	SLC30A2	chr1:26372281-26373313	0.612665	0.206317	0.406347	7.74992e-19	1.44217e-16		cg06372391	1	62785079	KANK4	chr1:62784136-62785133	0.330307	0.048082	0.282225	3.31962e-08	2.32243e-06		cg00114029	1	35351407	DLGAP3	chr1:35350878-35351854	0.542341	0.187813	0.354528	6.17719e-17	1.22835e-14		ASIP|434	-1.4923	-2.57655	0.000133422	0.000311185		BST2|684	1.37271	7.05581	5.69e-10	7.47e-09		ARID3A|1820	-1.35709	4.03931	7.93e-19	1.28e-17
cg27391649	1	26737199	LIN28	chr1:26737246-26738148	0.556677	0.264971	0.291706	1.10977e-09	1.82029e-08		cg06912182	1	63787586	FOXD3	chr1:63782394-63790471	0.568438	0.244063	0.324374	3.9468e-11	1.78627e-08		cg18852567	1	35351627	DLGAP3	chr1:35350878-35351854	0.647389	0.312165	0.335224	2.63715e-17	6.09886e-15		ASMT|438	-1.69129	-2.63469	5.06272e-09	2.05161e-08		BTBD17|388419	1.16975	-2.83203	0.00551114	0.0149295		ARL10|285598	-1.28354	-0.0599332	8.78e-19	1.4e-17
cg26040332	1	27960788	FGR	chr1:27960567-27961023	0.538226	0.0991995	0.439027	9.9995e-16	7.75619e-14		cg02595809	1	63787670	FOXD3	chr1:63782394-63790471	0.385493	0.134744	0.250749	9.85871e-09	9.22129e-07		cg14962509	1	36039655	TFAP2E	chr1:36038927-36040051	0.814049	0.548539	0.265509	1.14321e-08	1.88558e-07		ASPHD2|57168	1.92817	3.57435	5.12817e-80	3.26994e-77		BTBD19|149478	1.11683	-0.510054	3.38e-09	3.81e-08		ARL11|115761	-1.80765	2.35569	9.11e-28	4.78e-26
cg26801631	1	27961017	FGR	chr1:27960567-27961023	0.513353	0.125086	0.388267	2.23021e-16	2.05488e-14		cg11248715	1	63787928	FOXD3	chr1:63782394-63790471	0.316834	0.0556194	0.261215	1.25034e-07	6.53177e-06		cg13675280	1	36348523	EIF2C1	chr1:36348501-36349731	0.520046	0.236715	0.283331	1.60238e-06	1.65308e-05		ASRGL1|80150	1.15171	4.28476	1.25028e-18	1.20989e-17		BTG2|7832	-1.06593	7.21324	4.06e-17	2.18e-15		ARMC2|84071	-1.23483	1.4403	4.43e-17	5.83e-16
cg00338002	1	28198813	C1orf38	chr1:28199031-28199257	0.600205	0.229032	0.371173	8.19402e-16	6.53374e-14		cg15462232	1	63788184	FOXD3	chr1:63782394-63790471	0.35795	0.0634466	0.294503	2.17347e-09	2.98142e-07		cg19644018	1	36549719	TEKT2	chr1:36549554-36549965	0.545777	0.280385	0.265392	1.85499e-10	4.61311e-09		ATG9B|285973	-1.14747	2.67893	2.09816e-10	9.7706e-10		BTN1A1|696	2.34076	0.847134	1.48e-08	1.47e-07		ARMCX1|51309	-1.26884	2.58269	4.63e-27	2.17e-25
cg02447380	1	28919300	RAB42	chr1:28919041-28919454	0.407508	0.0310414	0.376467	3.90826e-12	1.14448e-10		cg26789332	1	63788255	FOXD3	chr1:63782394-63790471	0.359752	0.103906	0.255845	8.37245e-09	8.13699e-07		cg00870095	1	38099546	RSPO1	chr1:38099677-38100864	0.507533	0.193738	0.313795	1.15428e-18	4.76794e-16		ATOH1|474	1.00055	2.72127	3.16516e-05	8.06605e-05		C10orf11|83938	-1.45456	0.320792	1.7e-09	2.04e-08		ARMCX2|9823	-1.32706	3.52941	4.9e-28	2.71e-26
cg02525756	1	28919362	RAB42	chr1:28919041-28919454	0.48213	0.203934	0.278196	2.2788e-14	1.20853e-12		cg12690148	1	63788429	FOXD3	chr1:63782394-63790471	0.513831	0.220945	0.292886	2.35255e-06	6.4463e-05		cg08655686	1	38100087	RSPO1	chr1:38099677-38100864	0.495292	0.218141	0.277152	2.02825e-18	7.59281e-16		ATOH8|84913	-1.35043	2.29268	8.44871e-12	4.48138e-11		C10orf128|170371	1.11866	-0.533825	4.62e-07	3.36e-06		ART3|419	1.61987	1.01347	4.66e-08	1.94e-07
cg24118052	1	28919387	RAB42	chr1:28919041-28919454	0.552633	0.203105	0.349528	1.0401e-17	1.38025e-15		cg06952660	1	67773044	IL12RB2	chr1:67773329-67773767	0.565713	0.313285	0.252428	2.78403e-06	7.34693e-05		cg13448605	1	38100467	RSPO1	chr1:38099677-38100864	0.535227	0.207627	0.327601	1.64856e-19	9.63112e-17		ATP10B|23120	-1.07771	7.81449	6.35867e-18	5.84592e-17		C10orf67|256815	-2.66006	-2.48759	1.23e-14	4.26e-13		ART4|420	-1.6592	-1.6957	2.02e-06	6.71e-06
cg20003692	1	29138919	OPRD1	chr1:29138501-29139348	0.299039	0.0441478	0.254891	8.66391e-09	1.15015e-07		cg27516652	1	68904571	RPE65		0.829118	0.457635	0.371483	1.60745e-13	5.05387e-10		cg22063989	1	38100795	RSPO1	chr1:38099677-38100864	0.570991	0.301329	0.269662	1.42925e-13	8.69817e-12		ATP12A|479	-3.92106	0.022679	6.98255e-12	3.73253e-11		C10orf82|143379	-2.30412	-0.886269	7.67e-07	5.34e-06		ARX|170302	1.71751	-0.0786717	3.39e-07	1.25e-06
cg08366446	1	29138936	OPRD1	chr1:29138501-29139348	0.489406	0.102218	0.387188	4.3436e-10	7.83248e-09		cg00915178	1	71513733	PTGER3	chr1:71512224-71513804	0.560913	0.297798	0.263115	3.26841e-08	2.29483e-06		cg12391690	1	38100811	RSPO1	chr1:38099677-38100864	0.641084	0.375597	0.265487	1.1841e-10	3.08602e-09		ATP1A3|478	1.97173	2.26084	3.9744e-23	5.29939e-22		C10orf99|387695	-2.43784	5.75625	2.05e-12	4.53e-11		AS3MT|57412	-1.99339	1.25933	1.02e-27	5.25e-26
cg19715410	1	29139021	OPRD1	chr1:29138501-29139348	0.509113	0.196112	0.313001	8.06834e-11	1.72505e-09		cg01425670	1	72749015	NEGR1	chr1:72748471-72749736	0.378464	0.0979182	0.280546	8.01554e-11	2.82751e-08		cg12139725	1	38219781	EPHA10	chr1:38219702-38220012	0.553948	0.266948	0.287	2.28095e-11	7.15221e-10		ATP2A1|487	1.43438	0.361069	8.25444e-19	8.05326e-18		C11orf20|25858	2.08661	0.279695	5.81e-15	2.12e-13		ASAM|79827	-1.04355	2.94453	1.1e-13	9.53e-13
cg25840576	1	29447971	TMEM200B	chr1:29447699-29451847	0.533334	0.205031	0.328303	2.90002e-15	1.9624e-13		cg26153364	1	72749064	NEGR1	chr1:72748471-72749736	0.466307	0.149909	0.316399	4.24488e-10	8.90501e-08		cg13851466	1	38219973	EPHA10	chr1:38219702-38220012	0.533592	0.226992	0.3066	2.21852e-13	1.26707e-11		ATP6V0A4|50617	1.61652	-1.85963	1.70973e-06	5.1572e-06		C11orf21|29125	1.28005	-1.36868	2.4e-07	1.86e-06		ASB12|142689	-1.29839	-1.59459	8.25e-08	3.31e-07
cg03315764	1	29448425	TMEM200B	chr1:29447699-29451847	0.463273	0.0669248	0.396348	1.03088e-14	6.01061e-13		cg23714541	1	72749581	NEGR1	chr1:72748471-72749736	0.440559	0.174536	0.266024	7.10119e-08	4.19458e-06		cg22821908	1	38510522	POU3F1	chr1:38510102-38513642	0.599988	0.304282	0.295706	5.15179e-13	2.61084e-11		ATP8B3|148229	1.80579	-0.247802	1.79075e-37	6.42008e-36		C11orf41|25758	1.34189	3.03561	3.13e-05	0.00015139		ASB2|51676	-1.33002	2.70891	3.58e-12	2.56e-11
cg08706732	1	29448625	TMEM200B	chr1:29447699-29451847	0.387495	0.0365524	0.350942	1.03625e-13	4.57759e-12		cg04985396	1	72749735	NEGR1	chr1:72748471-72749736	0.527264	0.266577	0.260687	1.56009e-07	7.74589e-06		cg18755829	1	38512230	POU3F1	chr1:38510102-38513642	0.482868	0.143589	0.33928	1.32372e-13	8.13356e-12		ATP9A|10079	-1.73026	8.00113	2.02761e-64	4.36156e-62		C11orf92|399948	-1.55515	3.95236	5.53e-07	3.97e-06		ASB4|51666	1.31361	-1.38122	0.00079355	0.00177385
cg22698996	1	29449036	TMEM200B	chr1:29447699-29451847	0.291858	0.0270523	0.264806	7.67198e-12	2.08643e-10		cg06914015	1	78354839	NEXN	chr1:78354381-78354673	0.497079	0.224736	0.272344	6.19934e-07	2.25483e-05		cg05336094	1	38512238	POU3F1	chr1:38510102-38513642	0.331165	0.0607547	0.27041	8.02473e-11	2.17611e-09		AURKC|6795	1.02061	-1.49938	6.76057e-11	3.31035e-10		C12orf36|283422	-1.1371	5.2445	5.3e-08	4.69e-07		ASB5|140458	-3.87212	-1.17219	3.18e-18	4.73e-17
cg10165585	1	29449042	TMEM200B	chr1:29447699-29451847	0.54926	0.100637	0.448623	1.24309e-14	7.07077e-13		cg02996869	1	82267171	LPHN2	chr1:82265998-82269048	0.670505	0.397219	0.273285	6.0311e-06	0.000135128		cg12714180	1	38512250	POU3F1	chr1:38510102-38513642	0.400929	0.066827	0.334102	2.3266e-11	7.28058e-10		AUTS2|26053	-1.07065	5.99436	6.45583e-25	9.90226e-24		C12orf56|115749	-1.23782	-1.59	0.0139722	0.0332412		ASCL1|429	-1.58042	-2.6008	0.00018252	0.00045242
cg07556059	1	29449513	TMEM200B	chr1:29447699-29451847	0.481045	0.217786	0.263259	5.16791e-20	1.32717e-17		cg13559233	1	82269258	LPHN2	chr1:82265998-82269048	0.55385	0.20449	0.34936	3.47277e-09	4.20165e-07		cg12789062	1	38512663	POU3F1	chr1:38510102-38513642	0.430666	0.0656203	0.365046	1.98831e-12	8.38665e-11		AVPR1A|552	1.61631	-1.4028	4.56462e-26	7.57405e-25		C12orf59|120939	1.68218	-1.70659	6.98e-15	2.51e-13		ASCL2|430	-1.5268	6.56355	1.93e-12	1.42e-11
cg08467760	1	29449845	TMEM200B	chr1:29447699-29451847	0.558303	0.112994	0.445308	4.81771e-18	7.1144e-16		cg05787193	1	84543369	PRKACB	chr1:84543146-84544261	0.403108	0.0747554	0.328353	8.31763e-13	1.41823e-09		cg17412602	1	38512829	POU3F1	chr1:38510102-38513642	0.426334	0.0440222	0.382312	6.24279e-12	2.2823e-10		AXIN2|8313	-2.25893	7.86384	5.873e-50	4.74464e-48		C13orf18|80183	-1.60057	5.41065	2.54e-10	3.55e-09		ASGR1|432	-1.5742	2.52149	5.5e-09	2.63e-08
cg08258259	1	29450102	TMEM200B	chr1:29447699-29451847	0.55246	0.0465936	0.505866	3.93477e-17	4.47965e-15		cg07161166	1	84543374	PRKACB	chr1:84543146-84544261	0.34679	0.0562382	0.290551	8.22101e-11	2.87027e-08		cg27537203	1	38513245	POU3F1	chr1:38510102-38513642	0.481944	0.0507334	0.43121	2.72059e-12	1.10679e-10		B3GALT5|10317	1.15459	2.73772	4.80014e-08	1.7508e-07		C13orf30|144809	-1.7757	-2.8321	1.99e-07	1.57e-06		ASGR2|433	-3.62371	1.73755	1.75e-17	2.41e-16
cg05124308	1	29450569	TMEM200B	chr1:29447699-29451847	0.505219	0.101886	0.403332	9.78032e-17	9.98723e-15		cg15704369	1	84543558	PRKACB	chr1:84543146-84544261	0.432057	0.10112	0.330937	8.67068e-10	1.50433e-07		cg21270860	1	38513318	POU3F1	chr1:38510102-38513642	0.478979	0.155914	0.323065	7.77122e-15	7.40212e-13		B3GAT1|27087	1.77133	-1.16825	6.07216e-26	9.96437e-25		C13orf33|84935	1.82323	1.48313	7.75e-25	2.42e-22		ASPA|443	-1.10936	-1.57321	2.43e-06	7.99e-06
cg19716902	1	29450584	TMEM200B	chr1:29447699-29451847	0.540015	0.0280005	0.512015	3.74078e-16	3.25061e-14		cg16374471	1	84543951	PRKACB	chr1:84543146-84544261	0.502458	0.0795575	0.4229	4.32426e-11	1.89399e-08		cg26906273	1	39547881	MACF1	chr1:39547013-39547959	0.596125	0.232111	0.364014	3.56015e-12	1.39782e-10		B3GNT4|79369	1.7951	0.253516	8.98848e-28	1.67866e-26		C13orf38|728591	-1.40626	-2.88412	0.0159591	0.0372261		ASPDH|554235	-3.37236	-1.79892	1.9e-10	1.1e-09
cg23905374	1	29450643	TMEM200B	chr1:29447699-29451847	0.491468	0.0635257	0.427942	3.5567e-16	3.1063e-14		cg23698058	1	84544097	PRKACB	chr1:84543146-84544261	0.41656	0.1135	0.303059	1.31409e-09	2.03588e-07		cg20286956	1	39547918	MACF1	chr1:39547013-39547959	0.829866	0.525325	0.304541	2.14348e-17	5.17391e-15		B3GNT8|374907	-1.15794	4.77723	2.10185e-20	2.28124e-19		C14orf115|55237	1.37946	-0.21353	0.00011686	0.00049365		ASPHD2|57168	1.55615	3.90739	5.3e-42	3.86e-39
cg13548601	1	29450729	TMEM200B	chr1:29447699-29451847	0.498561	0.0695188	0.429043	6.48706e-14	3.02224e-12		cg20426713	1	84763338	SAMD13	chr1:84764108-84764906	0.712419	0.368752	0.343667	3.58122e-12	3.64683e-09		cg13457165	1	40105079	HEYL	chr1:40105010-40105707	0.510246	0.226986	0.283261	3.30055e-10	7.74688e-09		BAG2|9532	1.21368	3.642	6.10462e-15	4.37367e-14		C14orf34|645687	1.24816	-0.219446	7.53e-05	0.00033264		ASPN|54829	-2.10219	5.23668	5.84e-25	2.01e-23
cg20819218	1	29450834	TMEM200B	chr1:29447699-29451847	0.425198	0.0709317	0.354267	1.19121e-12	3.97264e-11		cg10879116	1	85358477	LPAR3	chr1:85358359-85359187	0.523241	0.262231	0.26101	4.73956e-07	1.82943e-05		cg05720261	1	40105304	HEYL	chr1:40105010-40105707	0.391824	0.0517826	0.340041	3.95071e-12	1.52977e-10		BAI2|576	1.6536	1.52404	2.00638e-32	5.08833e-31		C14orf49|161176	1.37611	0.520943	1.19e-16	5.91e-15		ASS1|445	1.07186	8.96733	6.11e-15	6.17e-14
cg11296230	1	29450836	TMEM200B	chr1:29447699-29451847	0.463332	0.0719258	0.391406	8.31595e-13	2.88214e-11		cg20431191	1	86043795	DDAH1	chr1:86042229-86042935	0.582106	0.289173	0.292934	9.26611e-06	0.00018952		cg23037132	1	40105664	HEYL	chr1:40105010-40105707	0.336469	0.0720594	0.26441	3.298e-10	7.74151e-09		BARX1|56033	-1.79879	-0.285337	1.83899e-05	4.8441e-05		C14orf64|388011	-1.73049	-0.144012	2.77e-09	3.17e-08		ASTN1|460	-3.01502	-1.56955	7.35e-17	9.43e-16
cg16117248	1	29451235	TMEM200B	chr1:29447699-29451847	0.349644	0.0324118	0.317232	2.3058e-08	2.76369e-07		cg15482792	1	91870014	HFM1	chr1:91869876-91870390	0.486345	0.106693	0.379651	2.45953e-09	3.24668e-07		cg17449954	1	40105667	HEYL	chr1:40105010-40105707	0.587347	0.226468	0.36088	1.99092e-10	4.9195e-09		BARX2|8538	2.14723	2.65951	6.27939e-34	1.76e-32		C14orf70|283601	-2.41388	-3.28568	3.6e-05	0.00017198		ATCAY|85300	-2.44696	-1.44768	3.26e-12	2.34e-11
cg04596632	1	29451471	TMEM200B	chr1:29447699-29451847	0.384094	0.0803974	0.303696	2.4013e-10	4.6056e-09		cg23032045	1	91870067	HFM1	chr1:91869876-91870390	0.534083	0.201193	0.332891	1.25768e-07	6.56662e-06		cg17602126	1	40105687	HEYL	chr1:40105010-40105707	0.634188	0.37189	0.262298	2.6512e-08	4.04333e-07		BATF3|55509	1.46451	0.882166	3.5364e-31	8.26426e-30		C15orf59|388135	1.02542	-1.2443	2.83e-05	0.00013853		ATG9B|285973	-1.03406	2.52118	4.12e-07	1.51e-06
cg05039004	1	29586299	PTPRU	chr1:29585897-29586598	0.367209	0.0800362	0.287173	1.01216e-09	1.67424e-08		cg10890233	1	91870382	HFM1	chr1:91869876-91870390	0.602559	0.294881	0.307678	3.67634e-06	9.14334e-05		cg12160637	1	40105706	HEYL	chr1:40105010-40105707	0.488378	0.208922	0.279455	4.99455e-11	1.42558e-09		BBOX1|8424	-1.28261	-3.12616	0.000657603	0.00137771		C16orf54|283897	-1.35108	2.29839	2.82e-06	1.73e-05		ATL1|51062	-1.08005	2.86161	7.07e-26	2.68e-24
cg26884027	1	29586418	PTPRU	chr1:29585897-29586598	0.357096	0.0826789	0.274418	4.0048e-07	3.55697e-06		cg27594756	1	91870389	HFM1	chr1:91869876-91870390	0.633391	0.345153	0.288237	1.28466e-06	3.98772e-05		cg23045719	1	40137636	NT5C1A	chr1:40136988-40138087	0.604933	0.200851	0.404082	7.16522e-24	3.1364e-20		BCAR4|400500	4.0822	-3.04815	1.37169e-24	2.04767e-23		C16orf74|404550	1.65627	0.947923	7.14e-10	9.25e-09		ATOH8|84913	-1.17828	2.07178	1.64e-11	1.08e-10
cg08847173	1	31654792	NKAIN1	chr1:31654422-31654833	0.561021	0.211733	0.349287	7.52716e-11	1.62176e-09		cg09935388	1	92947588	GFI1	chr1:92945907-92952609	0.801128	0.535412	0.265716	4.52137e-08	2.94996e-06		cg18862767	1	40137970	NT5C1A	chr1:40136988-40138087	0.655716	0.374191	0.281525	2.18121e-14	1.76542e-12		BCAT1|586	1.40364	2.98541	8.2002e-35	2.46891e-33		C16orf89|146556	-1.16807	-0.604303	0.0002456	0.00095422		ATP12A|479	-3.90491	-0.152156	1.76e-12	1.31e-11
cg11573219	1	32083031	HCRTR1	chr1:32083149-32084069	0.653258	0.371977	0.281281	4.21678e-14	2.06906e-12		cg14179389	1	92947961	GFI1	chr1:92945907-92952609	0.591028	0.209532	0.381496	8.75406e-12	6.59989e-09		cg07317551	1	40157931	HPCAL4	chr1:40156930-40158514	0.467735	0.0821257	0.385609	1.84558e-12	7.87408e-11		BCL11A|53335	-1.27387	4.31247	1.79412e-25	2.84985e-24		C17orf54|283982	-4.51023	-2.62046	3.67e-15	1.38e-13		ATP1A2|477	-3.29328	1.7304	1.34e-21	3.04e-20
cg05536984	1	32083535	HCRTR1	chr1:32083149-32084069	0.53555	0.10542	0.43013	2.39622e-14	1.2629e-12		cg01206378	1	95698827	RWDD3	chr1:95699725-95700142	0.685136	0.413507	0.271628	2.72817e-07	1.19377e-05		cg00068503	1	40782713	COL9A2	chr1:40782220-40783145	0.556149	0.161852	0.394297	1.80576e-16	2.98864e-14		BCL2A1|597	2.10792	2.18355	1.26363e-53	1.33496e-51		C17orf87|388325	1.32584	0.109045	1.37e-09	1.68e-08		ATP1A3|478	1.20943	2.75627	2.05e-06	6.8e-06
cg20608783	1	32220189	BAI2	chr1:32221887-32222107	0.674716	0.242554	0.432161	1.88229e-16	1.77331e-14		cg06990379	1	98386209	DPYD	chr1:98386189-98386724	0.309049	0.0586169	0.250432	7.63471e-09	7.5728e-07		cg24686358	1	40782785	COL9A2	chr1:40782220-40783145	0.599784	0.203639	0.396144	4.2193e-16	6.11978e-14		BCL2L10|10017	-1.17913	-0.356163	5.0695e-08	1.84716e-07		C17orf99|100141515	-1.02031	-1.96655	0.00155923	0.00490559		ATP1B2|482	-1.9313	0.289134	1.2e-27	6.1e-26
cg16704678	1	32230177	BAI2	chr1:32228347-32230252	0.3115	0.0442806	0.267219	2.49156e-08	2.96015e-07		cg20481640	1	100928376	CDC14A		0.740956	0.445429	0.295527	2.06141e-09	2.86931e-07		cg06953252	1	40782906	COL9A2	chr1:40782220-40783145	0.492458	0.110677	0.381781	4.66561e-20	3.42073e-17		BEAN|146227	2.0544	0.314323	4.81452e-21	5.47855e-20		C18orf18|147525	-1.57387	2.01423	3.38e-12	7.17e-11		ATP2A1|487	1.74537	0.400924	1.89e-20	3.71e-19
cg10316989	1	32930168	ZBTB8B	chr1:32930500-32931061	0.367953	0.099913	0.26804	7.29612e-09	9.84983e-08		cg05160678	1	101701734	S1PR1	chr1:101701785-101702068	0.447508	0.161485	0.286024	5.50392e-09	5.92573e-07		cg26710722	1	40782991	COL9A2	chr1:40782220-40783145	0.457609	0.0925684	0.365041	1.13804e-13	7.15304e-12		BEGAIN|57596	1.71662	0.401748	1.7959e-32	4.59369e-31		C19orf18|147685	-1.36954	-2.00648	0.00018744	0.00075145		ATP2B2|491	-3.40499	-1.26331	1.68e-17	2.32e-16
cg13666729	1	32930473	ZBTB8B	chr1:32930500-32931061	0.517592	0.2346	0.282991	1.01796e-13	4.50834e-12		cg20740769	1	101701819	S1PR1	chr1:101701785-101702068	0.40161	0.129931	0.271679	1.10234e-08	1.00452e-06		cg18186394	1	40783185	COL9A2	chr1:40781004-40781445	0.468967	0.187715	0.281251	6.31523e-15	6.20678e-13		BEST3|144453	-1.85352	-1.18271	3.50027e-08	1.29628e-07		C19orf26|255057	1.92102	0.217815	1.07e-14	3.74e-13		ATP2B3|492	-3.49704	-2.07467	7.43e-14	6.58e-13
cg09768093	1	32930511	ZBTB8B	chr1:32930500-32931061	0.596147	0.317123	0.279024	1.04989e-11	2.7687e-10		cg02628801	1	101701963	S1PR1	chr1:101701785-101702068	0.431028	0.109125	0.321903	1.20245e-10	3.71992e-08		cg15997906	1	43613433	FAM183A	chr1:43613488-43613842	0.583699	0.304927	0.278771	1.2315e-07	1.63114e-06		BEX1|55859	-1.13719	-1.72921	3.80757e-05	9.59768e-05		C19orf38|255809	1.4969	0.708212	2.06e-11	3.66e-10		ATP8A2|51761	-1.16789	-1.82416	2.24e-10	1.29e-09
cg22604123	1	32930522	ZBTB8B	chr1:32930500-32931061	0.559204	0.270463	0.288741	3.80158e-12	1.11625e-10		cg05338680	1	101701965	S1PR1	chr1:101701785-101702068	0.528508	0.204598	0.323909	4.13594e-10	8.77568e-08		cg04900427	1	43613567	FAM183A	chr1:43613488-43613842	0.531089	0.266149	0.26494	1.64133e-09	3.27836e-08		BEX2|84707	-2.79618	2.63893	4.73206e-20	5.03194e-19		C19orf41|126123	-3.831	-2.25132	1.79e-14	6.02e-13		ATP9A|10079	-1.54417	7.74513	1.08e-36	2.54e-34
cg22007227	1	32930544	ZBTB8B	chr1:32930500-32931061	0.510055	0.217683	0.292371	5.07325e-11	1.13768e-09		cg25012864	1	101702062	S1PR1	chr1:101701785-101702068	0.554952	0.173805	0.381147	8.44324e-10	1.48721e-07		cg16822216	1	44872502	RNF220	chr1:44871109-44874047	0.439836	0.118884	0.320952	2.05304e-14	1.67718e-12		BHLHA15|168620	1.1428	-0.384443	2.33701e-11	1.19282e-10		C19orf45|374877	-1.00786	1.19498	9.53e-08	7.97e-07		ATRNL1|26033	-1.51661	-0.481202	1.98e-07	7.54e-07
cg00987080	1	32930837	ZBTB8B	chr1:32930500-32931061	0.635601	0.304347	0.331254	8.46661e-15	5.06539e-13		cg13673164	1	110009509	SYPL2	chr1:110008962-110010124	0.552793	0.253266	0.299527	4.76017e-07	1.83521e-05		cg18180569	1	44883362	RNF220	chr1:44883136-44884272	0.606915	0.349185	0.25773	4.91585e-15	5.03915e-13		BIRC3|330	1.88833	4.94687	3.86725e-59	6.22034e-57		C19orf51|352909	1.37917	1.78133	3.61e-14	1.12e-12		AVPR2|554	-1.4314	-0.0013229	2.45e-09	1.22e-08
cg11524235	1	33351587	HPCA	chr1:33351686-33352397	0.505199	0.247412	0.257787	7.90704e-13	2.7554e-11		cg07571041	1	110009770	SYPL2	chr1:110008962-110010124	0.533563	0.246547	0.287016	8.00302e-10	1.42692e-07		cg15576900	1	44883697	RNF220	chr1:44883136-44884272	0.576876	0.2814	0.295476	8.00019e-13	3.82377e-11		BLVRA|644	1.41597	3.88703	1.94837e-35	6.0709e-34		C19orf59|199675	2.45308	0.53374	2.51e-14	8.2e-13		AXIN2|8313	-1.50084	7.08861	1.01e-16	1.27e-15
cg24417499	1	33351653	HPCA	chr1:33351686-33352397	0.621314	0.322186	0.299128	1.39508e-13	5.95639e-12		cg23472215	1	110282815	GSTM3	chr1:110282351-110283306	0.455762	0.203036	0.252725	1.46797e-06	4.43745e-05		cg19382731	1	44883990	RNF220	chr1:44883136-44884272	0.584418	0.324053	0.260366	1.79561e-17	4.47911e-15		BMP5|653	-1.04915	0.216757	1.43453e-05	3.84047e-05		C19orf69|100170765	1.23194	-2.11631	0.00118078	0.00384278		B3GNT4|79369	1.69691	0.472946	5.13e-19	8.46e-18
cg21604358	1	33351761	HPCA	chr1:33351686-33352397	0.467254	0.15965	0.307605	1.32335e-16	1.3066e-14		cg25027501	1	110283223	GSTM3	chr1:110282351-110283306	0.473526	0.206718	0.266808	2.39173e-08	1.81437e-06		cg13880950	1	44884096	RNF220	chr1:44883136-44884272	0.40897	0.118213	0.290758	8.27385e-12	2.93023e-10		BMPER|168667	-1.00302	0.480336	0.000536177	0.00113909		C1orf105|92346	-2.12176	-2.78485	2.3e-11	4.04e-10		BAALC|79870	-1.26808	-0.0549623	6.5e-12	4.5e-11
cg14119350	1	33351904	HPCA	chr1:33351686-33352397	0.428494	0.0993128	0.329181	1.94403e-13	8.00192e-12		cg04879281	1	111506980	C1orf103	chr1:111505881-111507007	0.507981	0.199923	0.308058	4.92072e-08	3.14476e-06		cg11715828	1	44884150	RNF220	chr1:44883136-44884272	0.360142	0.0965407	0.263601	1.25087e-10	3.23986e-09		BNIP3L|665	1.16015	5.83434	8.14269e-40	3.28913e-38		C1orf114|57821	-1.03698	-2.06334	0.00385436	0.0109206		BAAT|570	-1.36392	1.46046	0.00199731	0.00415662
cg11189532	1	33351946	HPCA	chr1:33351686-33352397	0.481311	0.0305321	0.450779	2.64043e-14	1.37593e-12		cg23923856	1	113051685	WNT2B	chr1:113050813-113052301	0.533575	0.232743	0.300832	8.07515e-08	4.62639e-06		cg20820767	1	45082840	RNF220	chr1:45082739-45083285	0.648144	0.298802	0.349342	5.10093e-13	2.58686e-11		BPI|671	-1.29526	-2.34943	8.40724e-06	2.32249e-05		C1orf125|126859	-1.92567	1.40916	7.44e-09	7.84e-08		BACH2|60468	-1.11261	1.43096	1.81e-09	9.2e-09
cg13306164	1	33352184	HPCA	chr1:33351686-33352397	0.454252	0.0194424	0.434809	1.31846e-11	3.38503e-10		cg14186963	1	113051777	WNT2B	chr1:113050813-113052301	0.454891	0.143596	0.311295	3.05044e-09	3.81502e-07		cg10329345	1	45083079	RNF220	chr1:45082739-45083285	0.858776	0.573589	0.285187	1.459e-13	8.82465e-12		BPIL1|80341	2.83136	-2.95955	1.11793e-11	5.87591e-11		C1orf161|126868	-1.79702	0.642257	1.21e-15	4.99e-14		BAI1|575	-1.17669	-0.296652	6.34e-08	2.58e-07
cg19830541	1	33352204	HPCA	chr1:33351686-33352397	0.49559	0.083902	0.411688	2.44637e-13	9.81209e-12		cg10806711	1	113265679	FAM19A3	chr1:113265573-113265787	0.545014	0.294959	0.250055	8.59869e-13	1.43283e-09		cg20944964	1	45083207	RNF220	chr1:45082739-45083285	0.574737	0.323234	0.251503	3.57798e-11	1.06661e-09		BRSK2|9024	-1.99267	2.88398	6.10882e-14	3.99366e-13		C1orf162|128346	1.60396	2.05129	9.09e-28	5.98e-25		BAI3|577	-1.80129	-1.52363	3.04e-14	2.8e-13
cg13870776	1	33352269	HPCA	chr1:33351686-33352397	0.392502	0.0200528	0.372449	1.18421e-11	3.08138e-10		cg16124571	1	115212670	DENND2C	chr1:115212239-115212985	0.329852	0.0609404	0.268911	1.62108e-07	7.99031e-06		cg04108939	1	45250181	BEST4	chr1:45249860-45250352	0.411824	0.131492	0.280332	1.3996e-07	1.83115e-06		BST2|684	2.13326	6.38154	4.44194e-38	1.64878e-36		C1orf175|374977	-1.36698	1.67736	4.38e-08	3.94e-07		BARX1|56033	-1.36496	-0.72148	7.55e-05	0.00019859
cg24490542	1	34628784	CSMD2	chr1:34628783-34630976	0.568342	0.286948	0.281394	2.10839e-11	5.1731e-10		cg00209951	1	115212834	DENND2C	chr1:115212239-115212985	0.307919	0.0495096	0.25841	8.03409e-08	4.61278e-06		cg23431851	1	46668822	POMGNT1;C1orf190	chr1:46668821-46669258	0.420306	0.138161	0.282146	1.53178e-09	3.07631e-08		BTBD17|388419	2.54113	-3.25937	5.5356e-16	4.35386e-15		C1orf180|439927	-1.40983	-0.586338	7.42e-07	5.18e-06		BARX2|8538	1.56703	3.07663	8.97e-13	6.9e-12
cg04272632	1	34629400	CSMD2	chr1:34628783-34630976	0.614927	0.31021	0.304717	1.05616e-13	4.65571e-12		cg25035908	1	115212901	DENND2C	chr1:115212239-115212985	0.328727	0.0449195	0.283808	3.60771e-08	2.47846e-06		cg08160980	1	46668840	POMGNT1;C1orf190	chr1:46668821-46669258	0.40435	0.138335	0.266015	2.67618e-08	4.07826e-07		BTK|695	1.2165	1.46036	1.61677e-19	1.66758e-18		C1orf230|284485	-1.75077	-1.70182	4.69e-05	0.00021809		BBOX1|8424	-2.8487	-2.38586	3.98e-11	2.49e-10
cg05817517	1	34630153	CSMD2	chr1:34628783-34630976	0.664536	0.384438	0.280097	2.70326e-11	6.46764e-10		cg15934415	1	115212914	DENND2C	chr1:115212239-115212985	0.389191	0.051544	0.337647	5.02873e-08	3.20401e-06		cg15696662	1	46669221	POMGNT1;C1orf190	chr1:46668821-46669258	0.529284	0.215345	0.313939	1.08467e-12	4.97275e-11		BTN1A1|696	2.60981	0.195452	2.60996e-26	4.40022e-25		C1QA|712	1.55005	6.38403	1.33e-20	1.55e-18		BCAM|4059	-1.15266	5.22361	3.11e-16	3.71e-15
cg15654121	1	34630944	CSMD2	chr1:34628783-34630976	0.686357	0.422295	0.264062	3.06426e-08	3.56348e-07		cg00819310	1	116193783	VANGL1		0.749107	0.49618	0.252927	4.14466e-09	4.79186e-07		cg10380348	1	47691158	TAL1	chr1:47690980-47691727	0.606732	0.296645	0.310087	7.18675e-15	6.90145e-13		BTN3A1|11119	1.1452	5.50032	1.25593e-41	5.82427e-40		C1QB|713	1.71398	6.79942	4.39e-20	4.51e-18		BCAR4|400500	4.47477	-2.88132	4.06e-20	7.63e-19
cg25025247	1	34632118	C1orf94;CSMD2	chr1:34628783-34630976	0.560478	0.308984	0.251494	2.913e-12	8.80192e-11		cg24106636	1	116381475	NHLH2	chr1:116380359-116382364	0.56635	0.212783	0.353567	1.17647e-08	1.05611e-06		cg10810752	1	47691160	TAL1	chr1:47690980-47691727	0.57308	0.194561	0.37852	5.77425e-15	5.76592e-13		BTN3A3|10384	1.16813	4.53473	1.57198e-32	4.05579e-31		C1QC|714	1.59611	6.66578	2.21e-18	1.52e-16		BCHE|590	-2.65115	0.978286	1.26e-20	2.55e-19
cg25772827	1	34632573	C1orf94;CSMD2	chr1:34628783-34630976	0.631086	0.276098	0.354988	1.56329e-15	1.1459e-13		cg21646199	1	116381654	NHLH2	chr1:116380359-116382364	0.501652	0.244921	0.256731	2.39093e-08	1.81423e-06		cg00955828	1	47691301	TAL1	chr1:47690980-47691727	0.539573	0.175143	0.364429	1.89472e-15	2.24516e-13		BTNL9|153579	1.40985	2.89685	2.61029e-20	2.81596e-19		C1QL4|338761	1.79939	-2.43591	1.99e-07	1.57e-06		BCL8|606	-1.71681	-2.73253	6.06e-07	2.17e-06
cg05382123	1	34632585	C1orf94;CSMD2	chr1:34628783-34630976	0.552784	0.299758	0.253026	1.39556e-14	7.84069e-13		cg02126788	1	116381660	NHLH2	chr1:116380359-116382364	0.484085	0.231372	0.252714	5.82835e-08	3.59553e-06		cg01001098	1	47691601	TAL1	chr1:47690980-47691727	0.554132	0.290395	0.263737	4.94466e-16	7.04299e-14		C10orf10|11067	1.40147	4.68618	2.60133e-35	8.04924e-34		C1QTNF8|390664	1.56956	-2.31298	0.00020368	0.00080994		BEGAIN|57596	1.026	0.855057	1.46e-07	5.66e-07
cg10106804	1	35258594	GJA4	chr1:35258564-35258791	0.549749	0.289362	0.260387	6.53016e-19	1.2436e-16		cg02623200	1	118727658	SPAG17	chr1:118727816-118728097	0.692773	0.441225	0.251547	3.40627e-08	2.36949e-06		cg10633601	1	47696701	TAL1	chr1:47696504-47698197	0.373897	0.0927232	0.281174	7.14059e-13	3.46888e-11		C10orf11|83938	-1.97643	1.10159	5.71398e-27	1.01409e-25		C20orf103|24141	1.25687	-0.176103	1.28e-08	1.28e-07		BEND5|79656	-1.31043	-0.408073	2.03e-14	1.92e-13
cg18113535	1	35351185	DLGAP3	chr1:35350878-35351854	0.590927	0.240725	0.350202	1.0823e-14	6.26428e-13		cg02152120	1	118727840	SPAG17	chr1:118727816-118728097	0.536074	0.240591	0.295483	2.08165e-07	9.72839e-06		cg03752218	1	47696788	TAL1	chr1:47696504-47698197	0.416417	0.0789493	0.337468	3.70293e-15	3.94329e-13		C10orf128|170371	1.06493	-0.742944	4.61955e-11	2.29999e-10		C20orf114|92747	3.89236	-1.84415	3.84e-10	5.19e-09		BEND6|221336	-1.68028	0.11735	8.82e-23	2.33e-21
cg26228266	1	35351340	DLGAP3	chr1:35350878-35351854	0.58319	0.129855	0.453335	2.16535e-14	1.15652e-12		cg00310968	1	118727904	SPAG17	chr1:118727816-118728097	0.493104	0.200601	0.292503	1.86064e-08	1.4889e-06		cg19809499	1	47882265	FOXE3	chr1:47881896-47883065	0.464277	0.075343	0.388934	3.21121e-12	1.27906e-10		C10orf47|254427	-1.18757	3.63515	7.9175e-19	7.7457e-18		C20orf194|25943	1.08537	1.70123	1.34e-12	3.06e-11		BEST3|144453	-2.06857	-1.09925	5.68e-08	2.33e-07
cg00114029	1	35351407	DLGAP3	chr1:35350878-35351854	0.542341	0.138231	0.40411	1.34978e-20	4.15818e-18		cg01105494	1	118727908	SPAG17	chr1:118727816-118728097	0.568553	0.292475	0.276078	4.45366e-07	1.74433e-05		cg18815943	1	47882314	FOXE3	chr1:47881896-47883065	0.373626	0.0731045	0.300521	3.88757e-12	1.50931e-10		C10orf67|256815	-2.84218	-1.98646	9.18015e-18	8.32837e-17		C20orf196|149840	-1.08506	2.72724	2.12e-16	9.95e-15		BEX1|55859	-2.22954	-0.988629	1.32e-15	1.46e-14
cg18852567	1	35351627	DLGAP3	chr1:35350878-35351854	0.647389	0.368086	0.279303	2.79061e-13	1.10284e-11		cg16240368	1	118728086	SPAG17	chr1:118727816-118728097	0.680375	0.402514	0.277861	2.66842e-08	1.97522e-06		cg15457058	1	47882322	FOXE3	chr1:47881896-47883065	0.377844	0.0587095	0.319134	2.14607e-11	6.78113e-10		C10orf79|80217	1.12909	-0.901218	6.41173e-12	3.44804e-11		C20orf197|284756	2.02014	-3.0167	1.71e-08	1.67e-07		BEX2|84707	-2.30153	2.04806	1.24e-14	1.2e-13
cg22851880	1	36038701	TFAP2E	chr1:36038927-36040051	0.575873	0.260958	0.314914	2.12484e-13	8.64904e-12		cg22718139	1	120311439	HMGCS2		0.87138	0.561127	0.310253	5.38492e-11	2.19343e-08		cg16022575	1	47904465	FOXD2	chr1:47902793-47905518	0.351847	0.0551872	0.29666	4.8686e-09	8.75226e-08		C10orf82|143379	-3.81096	0.876691	1.36444e-32	3.53565e-31		C20orf85|128602	-3.36499	-2.71647	1.94e-08	1.88e-07		BEX4|56271	-1.49185	3.35661	2.4e-26	9.77e-25
cg13060114	1	36038950	TFAP2E	chr1:36038927-36040051	0.292688	0.0353393	0.257349	1.51781e-08	1.90206e-07		cg04065086	1	151104186	SEMA6C	chr1:151103685-151106100	0.540763	0.226111	0.314652	3.55244e-13	7.71738e-10		cg03038003	1	49242900	AGBL4;BEND5	chr1:49242371-49242810	0.605903	0.272397	0.333506	1.59851e-15	1.92923e-13		C10orf93|255352	2.73982	-2.72597	1.19565e-19	1.24184e-18		C21orf129|150135	1.66123	-2.86727	1.36e-07	1.1e-06		BGN|633	-1.16623	9.07335	4.41e-20	8.27e-19
cg26372517	1	36039159	TFAP2E	chr1:36038927-36040051	0.474429	0.164346	0.310082	5.4421e-11	1.21141e-09		cg07371589	1	151104367	SEMA6C	chr1:151103685-151106100	0.667288	0.246825	0.420463	4.25014e-12	4.08825e-09		cg07790169	1	49242932	AGBL4;BEND5	chr1:49242371-49242810	0.591312	0.230444	0.360868	8.37257e-19	3.63774e-16		C10orf99|387695	-2.7225	6.49303	9.56443e-29	1.90797e-27		C21orf49|54067	-1.67021	-1.68242	3.81e-14	1.18e-12		BHLHE22|27319	-1.1854	1.00415	8.75e-16	9.88e-15
cg01101380	1	36039173	TFAP2E	chr1:36038927-36040051	0.384414	0.127984	0.256431	8.81946e-11	1.86807e-09		cg02698576	1	151104750	SEMA6C	chr1:151103685-151106100	0.680627	0.378532	0.302095	3.25795e-10	7.3865e-08		cg02290238	1	49242934	AGBL4;BEND5	chr1:49242371-49242810	0.522993	0.174188	0.348805	5.36197e-17	1.10199e-14		C11orf20|25858	2.28595	-0.266124	9.10291e-29	1.82001e-27		C21orf62|56245	-1.71317	-2.10785	9.5e-08	7.96e-07		BHMT|635	-2.85163	0.601793	4.47e-07	1.63e-06
cg14962509	1	36039655	TFAP2E	chr1:36038927-36040051	0.814049	0.3933	0.420749	1.57639e-15	1.15435e-13		cg09143801	1	151105049	SEMA6C	chr1:151103685-151106100	0.536742	0.231298	0.305443	2.18537e-08	1.68795e-06		cg10512745	1	50884480	DMRTA2	chr1:50884228-50891471	0.70972	0.417615	0.292105	5.50613e-13	2.76936e-11		C11orf41|25758	2.56742	2.20071	2.65117e-30	5.86544e-29		C21orf67|84536	1.03893	0.611597	3.92e-12	8.16e-11		BHMT2|23743	-3.09068	1.06638	7.99e-31	6.73e-29
cg00870095	1	38099546	RSPO1	chr1:38099677-38100864	0.507533	0.19754	0.309993	1.74322e-18	2.94157e-16		cg10234068	1	152083276	TCHH	chr1:152083021-152084240	0.531374	0.15145	0.379924	3.82466e-09	4.52656e-07		cg16809460	1	50885369	DMRTA2	chr1:50884228-50891471	0.584375	0.256658	0.327716	3.49184e-15	3.76221e-13		C11orf87|399947	-1.84359	-2.89645	6.70961e-08	2.40067e-07		C21orf90|114043	1.0234	-2.00783	0.00801706	0.0206933		BICC1|80114	-1.50845	2.58671	4.55e-23	1.26e-21
cg08655686	1	38100087	RSPO1	chr1:38099677-38100864	0.495292	0.242212	0.25308	4.0396e-16	3.48754e-14		cg24645670	1	152083292	TCHH	chr1:152083021-152084240	0.492669	0.142647	0.350022	1.92505e-08	1.52835e-06		cg19030579	1	50888710	DMRTA2	chr1:50884228-50891471	0.512886	0.225512	0.287374	5.3933e-10	1.20219e-08		C11orf9|745	1.85053	5.49346	3.31677e-36	1.08856e-34		C22orf45|646023	1.08426	-2.53157	0.00134789	0.00430854		BIRC3|330	1.29672	5.37125	3.03e-18	4.54e-17
cg13448605	1	38100467	RSPO1	chr1:38099677-38100864	0.535227	0.170244	0.364984	1.04058e-22	5.65141e-20		cg24880024	1	152083709	TCHH	chr1:152083021-152084240	0.507323	0.0794442	0.427878	1.6614e-11	9.92358e-09		cg26560222	1	50888826	DMRTA2	chr1:50884228-50891471	0.49207	0.235041	0.257029	8.47923e-08	1.16367e-06		C11orf90|387804	2.19402	-1.36827	1.25039e-27	2.30625e-26		C2orf39|92749	1.13346	-2.83792	0.019084	0.0431783		BMP3|651	-1.46712	1.29359	4.59e-06	1.45e-05
cg12139725	1	38219781	EPHA10	chr1:38219702-38220012	0.553948	0.243777	0.310171	9.63144e-13	3.28374e-11		cg20795569	1	152085136	TCHH	chr1:152084994-152085215	0.391143	0.0661598	0.324984	3.70527e-11	1.71789e-08		cg06921573	1	50889128	DMRTA2	chr1:50884228-50891471	0.41974	0.164417	0.255323	2.99401e-11	9.11504e-10		C11orf95|65998	-1.03281	4.86553	8.93217e-29	1.79185e-27		C2orf50|130813	1.15434	-2.2703	6.9e-06	3.88e-05		BMPER|168667	-1.2948	0.654382	1.72e-05	5e-05
cg13851466	1	38219973	EPHA10	chr1:38219702-38220012	0.533592	0.190718	0.342874	2.15227e-15	1.51333e-13		cg00584000	1	152085187	TCHH	chr1:152084994-152085215	0.473713	0.152931	0.320782	6.04365e-09	6.34607e-07		cg11448896	1	50889182	DMRTA2	chr1:50884228-50891471	0.409314	0.138397	0.270917	5.89547e-11	1.65312e-09		C12orf23|90488	1.00204	5.16726	8.55013e-37	2.89484e-35		C2orf58|285154	-1.95541	-2.01963	6.88e-12	1.36e-10		BMPR1B|658	-1.29665	0.383982	5.87e-08	2.41e-07
cg18755829	1	38512230	POU3F1	chr1:38510102-38513642	0.482868	0.137492	0.345376	7.34771e-14	3.37654e-12		cg05511392	1	153651938	NPR1	chr1:153650830-153652375	0.582681	0.242177	0.340505	1.16901e-11	7.88143e-09		cg00152008	1	50889225	DMRTA2	chr1:50884228-50891471	0.469647	0.142393	0.327254	6.01263e-12	2.21028e-10		C12orf27|283460	-1.05348	2.45807	1.08925e-13	6.97542e-13		C2orf65|130951	2.93294	-0.146211	2.21e-13	5.87e-12		BMX|660	-2.25949	1.0468	2.9e-15	3.07e-14
cg05336094	1	38512238	POU3F1	chr1:38510102-38513642	0.331165	0.0609306	0.270234	8.18019e-11	1.74565e-09		cg26246928	1	153652122	NPR1	chr1:153650830-153652375	0.451137	0.170212	0.280926	2.41889e-09	3.21142e-07		cg27265170	1	50889510	DMRTA2	chr1:50884228-50891471	0.398204	0.125562	0.272642	5.95073e-09	1.04937e-07		C12orf56|115749	-2.22512	-0.516764	1.17408e-06	3.60855e-06		C2orf85|285093	1.74998	-2.97666	1.32e-06	8.69e-06		BNC1|646	-2.56406	-2.00921	1.59e-13	1.35e-12
cg12714180	1	38512250	POU3F1	chr1:38510102-38513642	0.400929	0.0668174	0.334112	2.30504e-11	5.6054e-10		cg14178748	1	153652247	NPR1	chr1:153650830-153652375	0.517787	0.159461	0.358326	6.71553e-11	2.53475e-08		cg18198999	1	50890153	DMRTA2	chr1:50884228-50891471	0.456768	0.143113	0.313655	7.41726e-10	1.60551e-08		C12orf57|113246	1.10976	6.04506	9.30127e-24	1.30043e-22		C2orf89|129293	-1.18049	6.65465	1.3e-14	4.48e-13		BNC2|54796	-1.62604	3.07617	9.52e-28	4.97e-26
cg12789062	1	38512663	POU3F1	chr1:38510102-38513642	0.430666	0.0413757	0.38929	3.45263e-13	1.3299e-11		cg13795986	1	155880507	RIT1		0.621318	0.347289	0.274029	2.69507e-08	1.98697e-06		cg04431629	1	50890341	DMRTA2	chr1:50884228-50891471	0.449971	0.177281	0.27269	1.85193e-08	2.91878e-07		C12orf63|374467	1.1291	-3.21407	2.00979e-06	6.00348e-06		C3|718	1.56918	7.21995	4.04e-11	6.76e-10		BOC|91653	-2.0153	4.09492	2.15e-38	7.66e-36
cg17412602	1	38512829	POU3F1	chr1:38510102-38513642	0.426334	0.0226634	0.403671	1.53801e-12	5.00014e-11		cg26022183	1	156215655	PAQR6	chr1:156215368-156215899	0.342576	0.0857365	0.256839	6.78098e-06	0.000148145		cg20950465	1	53068181	GPX7	chr1:53067880-53068608	0.599645	0.263356	0.336289	8.53621e-19	3.69243e-16		C12orf70|341346	1.484	-2.38841	1.01694e-17	9.19779e-17		C3AR1|719	1.59888	3.29572	6.49e-19	4.97e-17		BPI|671	-1.87406	-2.06629	7.89e-12	5.4e-11
cg27537203	1	38513245	POU3F1	chr1:38510102-38513642	0.481944	0.0306433	0.4513	8.5008e-13	2.93684e-11		cg17787876	1	156467057	MEF2D	chr1:156469617-156471060	0.623677	0.334902	0.288775	1.97612e-10	5.22586e-08		cg16557944	1	53068197	GPX7	chr1:53067880-53068608	0.552812	0.239946	0.312866	2.15147e-17	5.18468e-15		C13orf18|80183	-2.79358	6.88394	1.71624e-52	1.62988e-50		C3orf55|152078	-1.76447	-0.901372	6.67e-07	4.69e-06		BRI3BP|140707	1.1521	4.1163	1.85e-44	2.58e-41
cg21270860	1	38513318	POU3F1	chr1:38510102-38513642	0.478979	0.101699	0.377281	4.5155e-17	5.05067e-15		cg08123045	1	156467188	MEF2D	chr1:156469617-156471060	0.559609	0.277461	0.282148	5.48778e-10	1.08379e-07		cg17088631	1	53098857	FAM159A	chr1:53098629-53099303	0.484246	0.218473	0.265773	5.49443e-14	3.84212e-12		C13orf23|80209	-1.13682	7.20986	1.00366e-38	3.80452e-37		C3orf67|200844	-1.89915	1.74325	9.59e-11	1.48e-09		BRSK2|9024	-1.57931	2.4161	9.29e-08	3.7e-07
cg26906273	1	39547881	MACF1	chr1:39547013-39547959	0.596125	0.25105	0.345075	2.25574e-11	5.49921e-10		cg21838334	1	156646653	NES	chr1:156646292-156647260	0.488197	0.234506	0.253691	1.70612e-07	8.33243e-06		cg11279444	1	53099053	FAM159A	chr1:53098629-53099303	0.697121	0.420308	0.276813	5.54969e-12	2.06076e-10		C13orf33|84935	1.03427	1.45436	1.29724e-14	9.05472e-14		C3orf72|401089	2.94896	-2.19612	7.97e-16	3.36e-14		BST2|684	1.30994	6.90133	3.25e-17	4.33e-16
cg20286956	1	39547918	MACF1	chr1:39547013-39547959	0.829866	0.520101	0.309765	4.14649e-18	6.24127e-16		cg20285128	1	156646746	NES	chr1:156646292-156647260	0.348368	0.0857465	0.262622	3.6054e-07	1.48349e-05		cg01394819	1	53527665	PODN	chr1:53527572-53528974	0.74728	0.291128	0.456152	2.80273e-19	1.47572e-16		C13orf38|728591	-1.48936	-2.6193	0.0028194	0.00531716		C3P1|388503	2.02452	-2.41582	0.0004985	0.00179264		BTBD18|643376	-2.44228	-2.04112	5.09e-09	2.45e-08
cg13457165	1	40105079	HEYL	chr1:40105010-40105707	0.510246	0.160859	0.349387	2.13459e-13	8.68152e-12		cg02619408	1	156818592	INSRR;NTRK1	chr1:156818622-156819192	0.41155	0.156809	0.254741	3.69795e-10	8.08739e-08		cg13764106	1	53527693	PODN	chr1:53527572-53528974	0.645407	0.212843	0.432564	7.86215e-20	5.16991e-17		C14orf115|55237	1.97614	-0.75922	5.35816e-12	2.90421e-11		C4A|720	1.25345	6.70793	1.6e-08	1.57e-07		BTN1A1|696	2.45121	0.513423	1.15e-15	1.28e-14
cg05720261	1	40105304	HEYL	chr1:40105010-40105707	0.391824	0.0333766	0.358447	1.05306e-12	3.55599e-11		cg12995941	1	156829377	INSRR;NTRK1	chr1:156828804-156831102	0.522019	0.260271	0.261749	1.05784e-07	5.7303e-06		cg17104425	1	53528224	PODN	chr1:53527572-53528974	0.590021	0.305147	0.284874	5.87643e-14	4.07427e-12		C14orf129|51527	1.02362	6.33285	2.62647e-29	5.43373e-28		C4BPA|722	-1.36782	3.4225	1.41e-05	7.46e-05		BTNL9|153579	1.25481	3.11363	2.06e-12	1.51e-11
cg23037132	1	40105664	HEYL	chr1:40105010-40105707	0.336469	0.0408386	0.29563	1.45072e-11	3.68909e-10		cg18863922	1	156889882	C1orf92	chr1:156890243-156890806	0.521137	0.251272	0.269865	4.45935e-12	4.19173e-09		cg22537280	1	54723213	SSBP3	chr1:54723696-54724019	0.844914	0.502007	0.342907	6.56489e-15	6.39005e-13		C14orf166B|145497	-2.17151	-3.30028	5.8081e-10	2.58534e-09		C4orf38|152641	1.19374	-2.37044	2.3e-07	1.79e-06		BVES|11149	-1.55742	1.66254	6.25e-23	1.7e-21
cg17449954	1	40105667	HEYL	chr1:40105010-40105707	0.587347	0.112788	0.474559	4.42751e-14	2.16269e-12		cg06360543	1	156890056	C1orf92	chr1:156890243-156890806	0.582419	0.310864	0.271555	2.68627e-08	1.98293e-06		cg06836772	1	57110403	PRKAA2	chr1:57110663-57111337	0.577614	0.18375	0.393864	1.82911e-13	1.07351e-11		C14orf184|650662	1.18235	-2.29558	3.79411e-10	1.72542e-09		C4orf47|441054	1.13626	-2.2538	1.72e-05	8.86e-05		C10orf107|219621	-1.42377	-1.87308	2.04e-06	6.77e-06
cg17602126	1	40105687	HEYL	chr1:40105010-40105707	0.634188	0.242696	0.391491	2.61431e-13	1.04131e-11		cg04113693	1	156890488	C1orf92	chr1:156890243-156890806	0.485652	0.200082	0.28557	2.44977e-08	1.84551e-06		cg09763175	1	57110722	PRKAA2	chr1:57110663-57111337	0.473849	0.0885705	0.385279	4.11828e-11	1.20358e-09		C14orf34|645687	2.23028	-0.910729	8.42935e-22	1.0231e-20		C5AR1|728	1.63133	3.44499	1.83e-22	3.09e-20		C10orf11|83938	-1.85845	0.893605	4.48e-26	1.75e-24
cg12160637	1	40105706	HEYL	chr1:40105010-40105707	0.488378	0.149353	0.339025	1.51612e-13	6.42081e-12		cg12124922	1	158150649	CD1D	chr1:158150620-158151503	0.623582	0.37252	0.251062	8.59852e-05	0.00108285		cg19083779	1	57110724	PRKAA2	chr1:57110663-57111337	0.421519	0.0722733	0.349245	8.45043e-13	4.01644e-11		C14orf49|161176	1.18322	0.310071	1.78242e-23	2.43857e-22		C5orf23|79614	1.00526	-0.357721	0.00063421	0.00221074		C10orf67|256815	-2.0038	-2.6563	1.84e-10	1.07e-09
cg23045719	1	40137636	NT5C1A	chr1:40136988-40138087	0.604933	0.206878	0.398055	7.64496e-24	5.45519e-21		cg05768141	1	160039847	KCNJ10	chr1:160040128-160040668	0.516552	0.259773	0.256779	5.63847e-06	0.000128119		cg04876835	1	57111099	PRKAA2	chr1:57110663-57111337	0.568338	0.125463	0.442875	7.04321e-17	1.36886e-14		C14orf64|388011	1.11801	-1.72184	5.85472e-09	2.35641e-08		C5orf38|153571	1.28954	0.685443	0.00188204	0.00578008		C10orf72|196740	-1.16793	3.79405	1.38e-24	4.64e-23
cg18862767	1	40137970	NT5C1A	chr1:40136988-40138087	0.655716	0.384251	0.271466	3.05333e-13	1.19364e-11		cg04975598	1	160039909	KCNJ10	chr1:160040128-160040668	0.347544	0.0834933	0.264051	5.7612e-08	3.56385e-06		cg12167830	1	57111108	PRKAA2	chr1:57110663-57111337	0.425762	0.0836625	0.342099	1.24641e-18	5.08402e-16		C14orf73|91828	1.10018	2.12293	1.85297e-16	1.52175e-15		C5orf4|10826	-1.51222	3.37503	2.22e-15	8.82e-14		C10orf82|143379	-2.6439	-0.310257	5.34e-13	4.23e-12
cg07317551	1	40157931	HPCAL4	chr1:40156930-40158514	0.467735	0.0461497	0.421585	1.69407e-13	7.08745e-12		cg25312122	1	160184732	PEA15		0.683074	0.404832	0.278243	3.21467e-11	1.55301e-08		cg26068551	1	57111117	PRKAA2	chr1:57110663-57111337	0.621291	0.128784	0.492506	2.03938e-17	4.98418e-15		C15orf55|256646	1.66074	-2.999	3.38463e-12	1.87029e-11		C5orf46|389336	1.87071	-1.07782	7.39e-10	9.54e-09		C10orf90|118611	-1.87692	-3.25371	1.8e-07	6.89e-07
cg00068503	1	40782713	COL9A2	chr1:40782220-40783145	0.556149	0.143885	0.412264	7.27746e-17	7.69535e-15		cg13428480	1	160370208	VANGL2	chr1:160370112-160370658	0.49909	0.133101	0.365989	1.92491e-10	5.15082e-08		cg09686317	1	57111122	PRKAA2	chr1:57110663-57111337	0.533924	0.11822	0.415704	3.26524e-17	7.31888e-15		C16orf54|283897	1.15166	0.800257	1.53345e-15	1.16108e-14		C5orf52|100190949	-1.79494	-1.24597	3.58e-11	6.03e-10		C10orf91|170393	1.12298	-0.97487	4.27e-08	1.79e-07
cg24686358	1	40782785	COL9A2	chr1:40782220-40783145	0.599784	0.166074	0.43371	1.49586e-17	1.90723e-15		cg24588482	1	160370253	VANGL2	chr1:160370112-160370658	0.511557	0.112398	0.399159	2.10821e-10	5.44746e-08		cg09935045	1	57111199	PRKAA2	chr1:57110663-57111337	0.516184	0.131836	0.384349	3.00104e-15	3.31376e-13		C17orf28|283987	1.10798	6.03054	4.5728e-27	8.15612e-26		C5orf58|133874	1.28773	-2.1791	2.89e-06	1.77e-05		C10orf93|255352	1.76581	-2.39189	1.37e-07	5.32e-07
cg06953252	1	40782906	COL9A2	chr1:40782220-40783145	0.492458	0.0803951	0.412062	2.13705e-21	8.0455e-19		cg07346851	1	160370286	VANGL2	chr1:160370112-160370658	0.346351	0.0612606	0.285091	6.70326e-08	3.99732e-06		cg12480034	1	57890488	DAB1	chr1:57887963-57890637	0.556638	0.276976	0.279662	8.0219e-14	5.31428e-12		C17orf82|388407	1.46569	-1.42704	9.11149e-18	8.27029e-17		C6orf103|79747	-4.84014	-2.51414	6.1e-35	4.13e-31		C10orf99|387695	-1.67181	5.43066	3.53e-09	1.72e-08
cg26710722	1	40782991	COL9A2	chr1:40782220-40783145	0.457609	0.0781409	0.379468	3.91556e-14	1.93878e-12		cg18398058	1	160370363	VANGL2	chr1:160370112-160370658	0.35267	0.0958905	0.25678	1.91358e-07	9.1194e-06		cg08458292	1	57890610	DAB1	chr1:57887963-57890637	0.596283	0.344071	0.252212	1.33918e-11	4.46638e-10		C17orf87|388325	1.48621	-0.262895	4.61462e-23	6.08939e-22		C6orf105|84830	-1.45391	4.37726	1.02e-06	6.92e-06		C11orf20|25858	2.29764	-0.0492216	1.16e-21	2.67e-20
cg18186394	1	40783185	COL9A2	chr1:40781004-40781445	0.468967	0.138111	0.330856	5.1604e-18	7.57468e-16		cg22535359	1	160370370	VANGL2	chr1:160370112-160370658	0.342593	0.0923991	0.250194	7.57492e-08	4.4087e-06		cg24740868	1	60539362	C1orf87	chr1:60539315-60539540	0.587149	0.316853	0.270295	4.29732e-11	1.24955e-09		C18orf18|147525	-1.2835	2.12114	3.63064e-15	2.66207e-14		C6orf138|442213	-1.5583	-0.173102	4.14e-07	3.05e-06		C11orf21|29125	-1.27642	-0.0363243	7.8e-06	2.39e-05
cg04100190	1	40783264	COL9A2	chr1:40781004-40781445	0.744125	0.473241	0.270883	5.70316e-27	7.74352e-24		cg07195126	1	160370843	VANGL2	chr1:160370112-160370658	0.439293	0.131662	0.30763	9.66035e-08	5.33751e-06		cg00914726	1	60539400	C1orf87	chr1:60539315-60539540	0.574661	0.266873	0.307788	7.90753e-09	1.35319e-07		C18orf56|494514	1.02857	0.925605	1.73208e-13	1.08928e-12		C6orf15|29113	-1.63457	-0.631331	0.00038791	0.00143324		C11orf41|25758	1.11825	2.95925	3.84e-08	1.63e-07
cg22449337	1	40943913	ZNF642	chr1:40942784-40943387	0.741941	0.444291	0.29765	4.11111e-14	2.02467e-12		cg02957185	1	161068781	KLHDC9	chr1:161068062-161068801	0.649558	0.398157	0.251401	6.01147e-09	6.32134e-07		cg09851465	1	60539671	C1orf87	chr1:60539315-60539540	0.510511	0.246786	0.263725	7.88503e-09	1.34965e-07		C19orf18|147685	-1.49613	-1.67441	1.89852e-09	8.01326e-09		C6orf154|221424	1.20631	1.08914	1.6e-08	1.57e-07		C11orf63|79864	-1.13669	0.983279	2.67e-12	1.93e-11
cg10012079	1	43311879	ZNF691	chr1:43312258-43312513	0.357203	0.101877	0.255326	3.79479e-10	6.94144e-09		cg10896862	1	161275561	MPZ		0.482857	0.218906	0.263951	8.94022e-08	5.01425e-06		cg05539515	1	62784269	KANK4	chr1:62784136-62785133	0.509829	0.246064	0.263765	3.89349e-14	2.88169e-12		C19orf23|148046	1.06935	0.0936589	8.10325e-26	1.31404e-24		C6orf174|387104	1.43375	0.174558	4.1e-11	6.86e-10		C11orf87|399947	-2.15648	-2.8296	1.33e-12	1e-11
cg16822216	1	44872502	RNF220	chr1:44871109-44874047	0.439836	0.118852	0.320983	1.80522e-14	9.84252e-13		cg27590049	1	165205199	LMX1A	chr1:165204501-165205507	0.563037	0.289171	0.273866	1.35987e-06	4.17433e-05		cg08845123	1	62784332	KANK4	chr1:62784136-62785133	0.56161	0.279191	0.282418	1.17529e-16	2.09534e-14		C19orf26|255057	1.07266	0.181694	8.97167e-10	3.91161e-09		C6orf176|90632	1.13724	-2.66259	0.00362163	0.010327		C11orf9|745	1.39146	5.85925	4.47e-17	5.88e-16
cg18180569	1	44883362	RNF220	chr1:44883136-44884272	0.606915	0.350167	0.256748	3.23608e-15	2.1604e-13		cg06872705	1	165205201	LMX1A	chr1:165204501-165205507	0.565972	0.30673	0.259242	3.14921e-06	8.09525e-05		cg09588271	1	62784651	KANK4	chr1:62784136-62785133	0.590639	0.0934846	0.497155	6.48254e-17	1.27596e-14		C19orf38|255809	1.99829	0.148653	4.32999e-37	1.49531e-35		C6orf58|352999	1.93392	-2.90426	9.43e-08	7.92e-07		C11orf90|387804	2.05103	-1.14568	1.58e-20	3.15e-19
cg15576900	1	44883697	RNF220	chr1:44883136-44884272	0.576876	0.308996	0.26788	1.25139e-10	2.55964e-09		cg16524049	1	165205506	LMX1A	chr1:165204501-165205507	0.687874	0.41298	0.274894	2.88861e-07	1.24895e-05		cg07558455	1	62784762	KANK4	chr1:62784136-62785133	0.479164	0.107087	0.372077	5.85181e-14	4.06008e-12		C19orf41|126123	-4.8033	-0.97625	1.0165e-30	2.31782e-29		C6orf97|80129	-1.19766	2.32518	4.63e-07	3.37e-06		C12orf53|196500	-1.62948	-0.122727	3.4e-19	5.8e-18
cg19382731	1	44883990	RNF220	chr1:44883136-44884272	0.584418	0.323219	0.2612	7.66304e-17	8.04362e-15		cg07135032	1	165322099	LMX1A	chr1:165321703-165322318	0.496974	0.234734	0.26224	4.5155e-08	2.94679e-06		cg16028201	1	62784802	KANK4	chr1:62784136-62785133	0.479539	0.063096	0.416443	2.95627e-13	1.61977e-11		C19orf46|163183	-1.42713	3.33652	1.3421e-11	6.99618e-11		C7orf33|202865	4.18135	-3.06009	1.08e-10	1.65e-09		C12orf56|115749	-1.91763	-0.86679	2.37e-05	6.73e-05
cg13880950	1	44884096	RNF220	chr1:44883136-44884272	0.40897	0.117934	0.291036	7.91885e-12	2.14601e-10		cg09248345	1	165325553	LMX1A	chr1:165324191-165326328	0.440765	0.172269	0.268495	9.98537e-07	3.27031e-05		cg06372391	1	62785079	KANK4	chr1:62784136-62785133	0.330307	0.0456201	0.284687	2.6798e-08	4.0827e-07		C19orf51|352909	2.87916	0.873677	6.82225e-91	6.76692e-88		C7orf4|64433	-2.31657	-2.82001	1.18e-13	3.28e-12		C12orf68|387856	-1.19967	0.618138	1.53e-20	3.06e-19
cg16547629	1	44884131	RNF220	chr1:44883136-44884272	0.539158	0.243839	0.295318	7.45272e-15	4.51592e-13		cg16596102	1	166134346	FAM78B	chr1:166134258-166136448	0.373167	0.114815	0.258352	3.51829e-08	2.42612e-06		cg06912182	1	63787586	FOXD3	chr1:63782394-63790471	0.568438	0.191384	0.377054	4.45328e-15	4.6297e-13		C19orf59|199675	2.15192	0.0851742	2.83222e-30	6.25048e-29		C8G|733	1.94527	1.2798	1.52e-10	2.25e-09		C13orf15|28984	-1.22823	3.9702	9.38e-26	3.52e-24
cg11715828	1	44884150	RNF220	chr1:44883136-44884272	0.360142	0.086027	0.274115	4.16504e-11	9.54099e-10		cg09279615	1	166134410	FAM78B	chr1:166134258-166136448	0.449897	0.151181	0.298716	1.23989e-07	6.48414e-06		cg02595809	1	63787670	FOXD3	chr1:63782394-63790471	0.385493	0.114221	0.271272	3.57377e-10	8.33346e-09		C19orf77|284422	-1.13134	5.29128	3.12746e-09	1.29554e-08		C8orf31|286122	1.87249	-1.94042	6.43e-13	1.56e-11		C13orf18|80183	-2.20475	6.21542	1.64e-23	4.78e-22
cg12049688	1	44884204	RNF220	chr1:44883136-44884272	0.324599	0.0620735	0.262526	1.81391e-08	2.22873e-07		cg06665322	1	167059365	GPA33		0.540442	0.281428	0.259014	1.37665e-08	1.18315e-06		cg11248715	1	63787928	FOXD3	chr1:63782394-63790471	0.316834	0.0264443	0.29039	5.74864e-09	1.01759e-07		C1orf105|92346	-3.72159	-1.35839	2.37897e-30	5.28285e-29		C8orf4|56892	-1.15815	5.66045	4.27e-09	4.72e-08		C13orf30|144809	-1.83481	-2.62208	1.37e-11	9.13e-11
cg20820767	1	45082840	RNF220	chr1:45082739-45083285	0.648144	0.2284	0.419743	5.44472e-16	4.53896e-14		cg12446199	1	167408841	CD247	chr1:167408512-167409137	0.511751	0.255213	0.256538	8.84908e-07	2.97627e-05		cg15462232	1	63788184	FOXD3	chr1:63782394-63790471	0.35795	0.0408815	0.317068	2.03722e-10	5.01864e-09		C1orf110|339512	4.30224	-2.12834	2.52507e-28	4.85929e-27		C8orf45|157777	-1.25296	0.480236	8.09e-10	1.04e-08		C13orf33|84935	-1.2689	3.07345	3.72e-14	3.4e-13
cg10329345	1	45083079	RNF220	chr1:45082739-45083285	0.858776	0.526714	0.332062	1.51488e-16	1.4711e-14		cg13380669	1	169395476	C1orf114	chr1:169396621-169396869	0.740037	0.479927	0.26011	1.8857e-08	1.5028e-06		cg26789332	1	63788255	FOXD3	chr1:63782394-63790471	0.359752	0.0625719	0.29718	3.59105e-11	1.06986e-09		C1orf130|400746	-1.07243	2.29685	7.16414e-11	3.49573e-10		C9|735	-1.575	-3.07045	1.41e-06	9.24e-06		C13orf36|400120	-3.3294	-2.77196	1.88e-12	1.39e-11
cg13189207	1	45083124	RNF220	chr1:45082739-45083285	0.682434	0.349959	0.332475	5.21332e-15	3.30439e-13		cg10143731	1	171453943	BAT2L2	chr1:171454517-171455239	0.610723	0.341954	0.268769	1.628e-08	1.34456e-06		cg23620340	1	63788424	FOXD3	chr1:63782394-63790471	0.382403	0.087384	0.295019	3.69544e-11	1.09761e-09		C1orf161|126868	-1.63801	0.886055	5.43371e-24	7.7425e-23		C9orf109|286333	1.5391	0.0363325	1.56e-09	1.88e-08		C13orf38|728591	-1.08407	-2.93908	0.00768275	0.0141785
cg20944964	1	45083207	RNF220	chr1:45082739-45083285	0.574737	0.22869	0.346047	7.07664e-16	5.72842e-14		cg25722073	1	172351357	DNM3		0.543511	0.278992	0.264519	1.03881e-08	9.60459e-07		cg12690148	1	63788429	FOXD3	chr1:63782394-63790471	0.513831	0.117441	0.396389	2.44725e-11	7.61668e-10		C1orf162|128346	1.53733	1.70652	1.29115e-55	1.61204e-53		C9orf110|100128385	1.36676	0.789536	2.7e-15	1.06e-13		C14orf115|55237	2.51311	-0.733688	4.86e-16	5.63e-15
cg26098401	1	45083278	RNF220	chr1:45082739-45083285	0.614664	0.342419	0.272244	7.14347e-17	7.56048e-15		cg06321345	1	177150848	FAM5B	chr1:177150814-177151165	0.485904	0.118606	0.367298	1.63437e-10	4.63562e-08		cg15841063	1	63789500	FOXD3	chr1:63782394-63790471	0.519622	0.224667	0.294955	9.59386e-13	4.49093e-11		C1orf168|199920	2.02423	-1.42769	4.80207e-12	2.61311e-11		C9orf128|392307	-1.55225	-1.83638	3.48e-07	2.6e-06		C14orf129|51527	1.07586	6.41779	3.09e-25	1.1e-23
cg23431851	1	46668822	POMGNT1;C1orf190	chr1:46668821-46669258	0.420306	0.118494	0.301812	1.89089e-10	3.71336e-09		cg03884587	1	177150934	FAM5B	chr1:177150814-177151165	0.422503	0.153049	0.269454	1.93473e-09	2.72139e-07		cg08856601	1	65730351	DNAJC6	chr1:65731411-65731849	0.429458	0.161591	0.267867	1.7126e-08	2.71721e-07		C1orf175|374977	-1.10742	1.78027	9.26469e-08	3.25934e-07		C9orf139|401563	1.47529	-1.9054	2.44e-09	2.82e-08		C14orf132|56967	-1.76237	3.19842	1.54e-32	1.72e-30
cg08160980	1	46668840	POMGNT1;C1orf190	chr1:46668821-46669258	0.40435	0.115191	0.289159	2.48305e-09	3.74694e-08		cg12042448	1	177151076	FAM5B	chr1:177150814-177151165	0.400732	0.124748	0.275983	9.93754e-09	9.28166e-07		cg09235539	1	65730481	DNAJC6	chr1:65731411-65731849	0.485497	0.192467	0.293029	4.90417e-10	1.10637e-08		C1orf180|439927	-1.88191	0.129209	6.70714e-20	7.05237e-19		C9orf24|84688	1.16574	0.662111	8.47e-06	4.69e-05		C14orf180|400258	-3.19406	-1.85572	2.46e-09	1.23e-08
cg15696662	1	46669221	POMGNT1;C1orf190	chr1:46668821-46669258	0.529284	0.208133	0.32115	4.2951e-13	1.60998e-11		cg27174972	1	177151164	FAM5B	chr1:177150814-177151165	0.570921	0.265246	0.305675	6.33575e-09	6.57345e-07		cg09082287	1	65730494	DNAJC6	chr1:65731411-65731849	0.528557	0.233826	0.29473	4.8753e-10	1.10053e-08		C1orf228|339541	1.25284	-1.55633	5.40522e-14	3.55975e-13		C9orf57|138240	-1.02248	-3.30198	0.00562611	0.0152062		C14orf184|650662	1.31082	-2.27587	8.32e-08	3.34e-07
cg10380348	1	47691158	TAL1	chr1:47690980-47691727	0.606732	0.213906	0.392826	2.80833e-19	5.87997e-17		cg06515144	1	179545091	NPHS2	chr1:179544720-179545307	0.410504	0.14532	0.265184	1.15412e-07	6.12849e-06		cg24550010	1	65731107	DNAJC6	chr1:65731411-65731849	0.654426	0.370299	0.284128	5.15224e-15	5.24845e-13		C1orf230|284485	-3.50366	0.100151	2.78085e-24	4.02671e-23		C9orf71|169693	-2.80053	-1.9164	2.81e-12	6.02e-11		C14orf34|645687	1.63306	-0.522831	5.55e-10	3.02e-09
cg10810752	1	47691160	TAL1	chr1:47690980-47691727	0.57308	0.121016	0.452064	3.70687e-18	5.67102e-16		cg13931925	1	179545216	NPHS2	chr1:179544720-179545307	0.371861	0.112698	0.259163	6.95004e-10	1.28908e-07		cg26615127	1	65731432	DNAJC6	chr1:65731411-65731849	0.657828	0.287592	0.370236	1.50318e-15	1.83381e-13		C1orf88|128344	-1.48044	0.866974	3.38964e-09	1.39733e-08		CA10|56934	-1.83962	-3.11438	4.06e-08	3.67e-07		C14orf68|283600	-4.60344	0.89802	4.91e-18	7.17e-17
cg00955828	1	47691301	TAL1	chr1:47690980-47691727	0.539573	0.101094	0.438478	8.84312e-19	1.60886e-16		cg24198584	1	180198528	LHX4	chr1:180198119-180204975	0.578034	0.281087	0.296947	2.66838e-08	1.97522e-06		cg00466108	1	65731689	DNAJC6	chr1:65731411-65731849	0.499673	0.245538	0.254135	1.0288e-12	4.76204e-11		C1orf95|375057	-1.15553	-0.662083	0.000136158	0.000317028		CA7|766	1.52435	1.82116	0.00016264	0.00066288		C14orf70|283601	-2.22124	-3.21019	0.0003176	0.00075721
cg01001098	1	47691601	TAL1	chr1:47690980-47691727	0.554132	0.27703	0.277102	3.56431e-17	4.10576e-15		cg00882235	1	180203488	LHX4	chr1:180198119-180204975	0.448517	0.175041	0.273476	8.04879e-08	4.61773e-06		cg07027116	1	65731738	DNAJC6	chr1:65731411-65731849	0.615016	0.358886	0.25613	8.47398e-10	1.81046e-08		C1QA|712	1.64229	5.96813	8.64835e-45	5.14692e-43		CAB39L|81617	-1.2485	3.4282	1.02e-12	2.38e-11		C14orf73|91828	1.24089	2.17747	1.58e-15	1.74e-14
cg06955484	1	47695408	TAL1	chr1:47696504-47698197	0.574243	0.320922	0.253321	1.31837e-11	3.38503e-10		cg05719164	1	180204221	LHX4	chr1:180198119-180204975	0.59667	0.233333	0.363337	6.54127e-09	6.71003e-07		cg00920348	1	66999304	SGIP1	chr1:66998728-66999060	0.539759	0.272284	0.267475	2.41085e-11	7.52014e-10		C1QB|713	1.71189	6.38552	3.96201e-41	1.75094e-39		CACNA1B|774	-1.98423	0.211692	0.00010284	0.00043984		C15orf51|196968	-1.06521	-2.3634	8.35e-07	2.93e-06
cg10633601	1	47696701	TAL1	chr1:47696504-47698197	0.373897	0.0725573	0.30134	6.15512e-14	2.88409e-12		cg11189384	1	180204379	LHX4	chr1:180198119-180204975	0.501257	0.234935	0.266321	6.63457e-09	6.77258e-07		cg25203031	1	66999813	SGIP1	chr1:66998728-66999060	0.557059	0.270566	0.286493	4.21178e-11	1.22773e-09		C1QC|714	1.55437	6.30057	3.26974e-34	9.34048e-33		CACNA1C|775	-1.09317	4.2022	5.84e-07	4.17e-06		C15orf55|256646	1.89576	-2.98541	1.24e-10	7.36e-10
cg03752218	1	47696788	TAL1	chr1:47696504-47698197	0.416417	0.075398	0.341019	2.06349e-15	1.46071e-13		cg23598080	1	180204499	LHX4	chr1:180198119-180204975	0.484392	0.212055	0.272337	6.11593e-08	3.72669e-06		cg00318756	1	67773020	IL12RB2	chr1:67773329-67773767	0.432193	0.14983	0.282363	4.49367e-13	2.32022e-11		C1QL4|338761	1.06958	-2.47933	7.0284e-05	0.000170496		CACNA1E|777	1.55011	0.409225	2.91e-05	0.00014184		C15orf59|388135	-1.38188	0.112099	6.3e-16	7.2e-15
cg19809499	1	47882265	FOXE3	chr1:47881896-47883065	0.464277	0.0426566	0.42162	3.4775e-13	1.33858e-11		cg06986584	1	180904677	KIAA1614	chr1:180904316-180904711	0.870987	0.604689	0.266298	2.53582e-11	1.31498e-08		cg06952660	1	67773044	IL12RB2	chr1:67773329-67773767	0.565713	0.229579	0.336134	9.58776e-14	6.17313e-12		C1QTNF8|390664	1.86863	-2.65036	1.81853e-13	1.13883e-12		CACNA1S|779	-4.40832	-2.00685	2.06e-13	5.5e-12		C16orf45|89927	-1.35282	3.33066	1.17e-33	1.52e-31
cg18815943	1	47882314	FOXE3	chr1:47881896-47883065	0.373626	0.0369409	0.336685	1.36504e-13	5.84942e-12		cg24365464	1	190448126	FAM5C		0.558529	0.267752	0.290777	4.7252e-07	1.82533e-05		cg27416067	1	67773128	IL12RB2	chr1:67773329-67773767	0.542975	0.182391	0.360584	2.73541e-14	2.13762e-12		C20orf111|51526	-1.20214	6.18462	2.31128e-50	1.93735e-48		CACNA2D1|781	1.03795	-1.01166	2.95e-05	0.00014373		C16orf5|29965	-1.08477	4.08327	1.53e-14	1.47e-13
cg15457058	1	47882322	FOXE3	chr1:47881896-47883065	0.377844	0.0315468	0.346297	2.12559e-12	6.63811e-11		cg22671471	1	197880384	LHX9	chr1:197880016-197881637	0.565898	0.234727	0.331171	3.89558e-09	4.58092e-07		cg00993824	1	67773175	IL12RB2	chr1:67773329-67773767	0.411183	0.123125	0.288058	8.92322e-14	5.80516e-12		C20orf112|140688	-1.36655	6.70922	3.66567e-63	7.52264e-61		CACNA2D2|9254	-3.44257	3.53154	3.59e-29	3.99e-26		C16orf73|254528	-1.59778	-2.95798	0.00149614	0.00319402
cg01281911	1	47882686	FOXE3	chr1:47881896-47883065	0.393176	0.096038	0.297138	1.16688e-14	6.68524e-13		cg13364881	1	197880513	LHX9	chr1:197880016-197881637	0.548098	0.281604	0.266495	3.98925e-09	4.66753e-07		cg15991072	1	67773404	IL12RB2	chr1:67773329-67773767	0.481598	0.149592	0.332005	1.44873e-13	8.78207e-12		C20orf114|92747	1.96064	-2.02964	2.59006e-05	6.67479e-05		CACNA2D4|93589	1.20538	2.01697	1.63e-09	1.96e-08		C16orf89|146556	-2.18306	0.429092	5.64e-14	5.07e-13
cg16022575	1	47904465	FOXD2	chr1:47902793-47905518	0.351847	0.0422681	0.309579	1.59392e-09	2.52244e-08		cg19704348	1	197880726	LHX9	chr1:197880016-197881637	0.370028	0.084558	0.28547	3.34566e-08	2.33786e-06		cg20803547	1	67773440	IL12RB2	chr1:67773329-67773767	0.536885	0.175891	0.360994	5.03596e-14	3.57091e-12		C20orf117|140710	-1.01673	3.53025	2.35232e-17	2.06888e-16		CACNB2|783	-1.41	1.87967	4.5e-12	9.23e-11		C17orf54|283982	-3.01878	-3.25766	3.93e-08	1.66e-07
cg15691862	1	47905438	FOXD2	chr1:47902793-47905518	0.739886	0.44475	0.295137	4.16869e-14	2.0489e-12		cg10897376	1	197880923	LHX9	chr1:197880016-197881637	0.340821	0.0902375	0.250584	1.82174e-07	8.78016e-06		cg23647191	1	71513494	PTGER3	chr1:71512224-71513804	0.40756	0.119916	0.287644	2.10428e-13	1.20888e-11		C20orf118|140711	-1.01227	4.76282	2.98827e-21	3.45996e-20		CACNB4|785	-1.06569	-0.122228	0.00018841	0.00075504		C17orf82|388407	1.11113	-1.1743	1.32e-08	5.98e-08
cg14513071	1	47905517	FOXD2	chr1:47902793-47905518	0.844716	0.587381	0.257336	5.9259e-16	4.89281e-14		cg24085809	1	197881471	LHX9	chr1:197880016-197881637	0.396618	0.101855	0.294763	2.56827e-08	1.91754e-06		cg12739034	1	71513626	PTGER3	chr1:71512224-71513804	0.477685	0.170956	0.306729	7.45583e-15	7.14113e-13		C20orf134|170487	-1.49196	3.42089	1.78447e-29	3.73066e-28		CACNG4|27092	-1.27841	0.691495	0.00324407	0.00936761		C18orf18|147525	-1.01817	1.83248	9.64e-09	4.47e-08
cg03038003	1	49242900	AGBL4;BEND5	chr1:49242371-49242810	0.605903	0.338742	0.267161	2.67503e-11	6.40636e-10		cg08008403	1	197881741	LHX9	chr1:197880016-197881637	0.354673	0.102345	0.252328	2.97036e-10	6.89188e-08		cg03726881	1	71513726	PTGER3	chr1:71512224-71513804	0.590724	0.270911	0.319813	4.87939e-15	5.00732e-13		C20orf152|140894	-2.78988	-1.42333	7.47621e-13	4.41111e-12		CACNG6|59285	4.77181	-1.44511	1.54e-13	4.21e-12		C18orf2|56651	-1.22145	-2.63287	0.00721816	0.0134095
cg07790169	1	49242932	AGBL4;BEND5	chr1:49242371-49242810	0.591312	0.323904	0.267408	3.41189e-12	1.01339e-10		cg27225220	1	197881774	LHX9	chr1:197880016-197881637	0.553664	0.205235	0.34843	2.59264e-12	3.01927e-09		cg00915178	1	71513733	PTGER3	chr1:71512224-71513804	0.560913	0.219988	0.340925	3.4977e-15	3.76418e-13		C20orf165|128497	-2.19535	0.180214	1.28334e-46	8.71209e-45		CADM1|23705	1.18523	2.85068	3.06e-06	1.86e-05		C18orf34|374864	-1.45153	-2.49099	2.88e-08	1.24e-07
cg02290238	1	49242934	AGBL4;BEND5	chr1:49242371-49242810	0.522993	0.256214	0.266779	1.0558e-11	2.78179e-10		cg05527530	1	197882003	LHX9	chr1:197880016-197881637	0.494417	0.209945	0.284472	4.8896e-11	2.04972e-08		cg20785136	1	71513789	PTGER3	chr1:71512224-71513804	0.476363	0.176621	0.299742	2.77776e-15	3.10107e-13		C20orf177|63939	-1.15258	4.03258	1.38234e-29	2.92074e-28		CADM3|57863	1.10276	-0.428351	0.00020003	0.00079703		C18orf56|494514	1.31432	0.912401	2.15e-14	2.03e-13
cg16515477	1	49511332	AGBL4		0.711005	0.454299	0.256706	1.58131e-09	2.50525e-08		cg15544654	1	197882295	LHX9	chr1:197880016-197881637	0.530994	0.241519	0.289475	6.41964e-09	6.62932e-07		cg04645342	1	72748124	NEGR1	chr1:72748471-72749736	0.606213	0.20528	0.400933	3.84207e-15	4.0693e-13		C20orf191|149934	-2.19015	-3.07859	1.8556e-06	5.56712e-06		CADPS|8618	-2.22781	4.43479	9.3e-14	2.64e-12		C19orf18|147685	-1.37163	-1.84218	2.62e-08	1.14e-07
cg10512745	1	50884480	DMRTA2	chr1:50884228-50891471	0.70972	0.414499	0.295221	1.12616e-12	3.77632e-11		cg16353006	1	197882469	LHX9	chr1:197880016-197881637	0.657444	0.296843	0.3606	2.51884e-10	6.13288e-08		cg05352161	1	72748139	NEGR1	chr1:72748471-72749736	0.473915	0.169783	0.304132	5.28107e-15	5.35352e-13		C20orf196|149840	-1.35421	3.23768	1.28797e-26	2.23473e-25		CALB1|793	1.822	4.83264	0.00209087	0.00633333		C19orf23|148046	1.14488	0.168842	9.21e-21	1.89e-19
cg03989480	1	50885352	DMRTA2	chr1:50884228-50891471	0.600371	0.331906	0.268464	6.54965e-13	2.33794e-11		cg03660500	1	197887649	LHX9	chr1:197887088-197887791	0.471824	0.15184	0.319985	2.4052e-11	1.27326e-08		cg17517900	1	72748607	NEGR1	chr1:72748471-72749736	0.318701	0.0646484	0.254053	1.78162e-09	3.52854e-08		C20orf197|284756	1.12619	-3.02558	2.73974e-06	8.06785e-06		CALB2|794	2.93262	2.22875	4.38e-14	1.34e-12		C19orf30|284424	-1.65725	-2.90618	0.00132425	0.00285724
cg16809460	1	50885369	DMRTA2	chr1:50884228-50891471	0.584375	0.259831	0.324543	9.91191e-15	5.8056e-13		cg20743365	1	197887714	LHX9	chr1:197887088-197887791	0.58233	0.235796	0.346534	5.49795e-10	1.08499e-07		cg01425670	1	72749015	NEGR1	chr1:72748471-72749736	0.378464	0.0594096	0.319054	3.81078e-13	2.0119e-11		C20orf24|55969	-1.13977	7.84731	3.16693e-44	1.81808e-42		CALCA|796	-4.24864	0.0189514	2.58e-14	8.39e-13		C19orf38|255809	1.10816	0.676298	3.22e-12	2.32e-11
cg19030579	1	50888710	DMRTA2	chr1:50884228-50891471	0.512886	0.22985	0.283035	9.22056e-10	1.54014e-08		cg13071729	1	201617443	NAV1	chr1:201617041-201619788	0.454039	0.178688	0.27535	1.52752e-09	2.27519e-07		cg26153364	1	72749064	NEGR1	chr1:72748471-72749736	0.466307	0.0819196	0.384388	8.0869e-15	7.65556e-13		C20orf56|140828	2.44923	5.12122	3.35469e-37	1.16982e-35		CALCB|797	-3.05289	2.97049	0.00021795	0.00086108		C19orf41|126123	-4.13378	-1.75281	1.92e-17	2.62e-16
cg06921573	1	50889128	DMRTA2	chr1:50884228-50891471	0.41974	0.136352	0.283388	8.98078e-13	3.08197e-11		cg14834267	1	201617847	NAV1	chr1:201617041-201619788	0.414676	0.100222	0.314453	3.69189e-10	8.08018e-08		cg23714541	1	72749581	NEGR1	chr1:72748471-72749736	0.440559	0.0909976	0.349562	1.2234e-13	7.61609e-12		C20orf85|128602	-2.0259	-2.97811	2.09415e-05	5.47103e-05		CALML3|810	-3.51471	0.184737	1.4e-17	8.25e-16		C19orf51|352909	1.98491	1.38097	5.8e-24	1.79e-22
cg11448896	1	50889182	DMRTA2	chr1:50884228-50891471	0.409314	0.102442	0.306872	1.27176e-12	4.21349e-11		cg16517702	1	201617853	NAV1	chr1:201617041-201619788	0.442135	0.102316	0.339819	8.12359e-11	2.85091e-08		cg04985396	1	72749735	NEGR1	chr1:72748471-72749736	0.527264	0.137871	0.389394	8.28519e-16	1.10548e-13		C21orf29|54084	-1.73305	0.963117	1.30967e-09	5.62763e-09		CALML5|51806	4.49816	-1.12664	2.68e-09	3.08e-08		C1orf105|92346	-2.83636	-2.14809	2.76e-17	3.72e-16
cg00152008	1	50889225	DMRTA2	chr1:50884228-50891471	0.469647	0.107426	0.362221	2.04403e-13	8.36073e-12		cg05695937	1	201618003	NAV1	chr1:201617041-201619788	0.55091	0.244825	0.306086	1.75433e-09	2.52455e-07		cg19411474	1	75600224	LHX8	chr1:75600674-75601415	0.651866	0.300856	0.35101	4.40656e-14	3.19807e-12		C21orf49|54067	-1.72566	-1.32113	4.59414e-23	6.06684e-22		CALN1|83698	-1.81493	-3.33088	4.85e-05	0.00022461		C1orf110|339512	1.43675	-1.35932	0.00221569	0.00457343
cg19380001	1	50889427	DMRTA2	chr1:50884228-50891471	0.286121	0.0274386	0.258682	4.39081e-09	6.25137e-08		cg09358973	1	201618030	NAV1	chr1:201617041-201619788	0.567338	0.286104	0.281234	2.08502e-10	5.41617e-08		cg07404921	1	75600250	LHX8	chr1:75600674-75601415	0.465531	0.211857	0.253675	6.32046e-11	1.7596e-09		C21orf56|84221	-1.48164	3.42802	3.96821e-15	2.90362e-14		CALY|50632	1.69184	-2.55286	0.0004102	0.0015068		C1orf133|574036	-1.0697	0.231304	3.89e-11	2.45e-10
cg10776919	1	50889442	DMRTA2	chr1:50884228-50891471	0.291453	0.0285787	0.262874	1.04287e-09	1.72028e-08		cg16966962	1	201915989	LMOD1		0.465109	0.181054	0.284055	6.76217e-10	1.26398e-07		cg23166389	1	75600391	LHX8	chr1:75600674-75601415	0.651733	0.376708	0.275025	5.3193e-18	1.65608e-15		C21orf62|56245	-1.81079	-1.7794	1.2246e-10	5.84129e-10		CAMK1G|57172	1.33127	-1.47594	1.08e-11	2.03e-10		C1orf161|126868	-1.1802	0.429856	1.47e-08	6.62e-08
cg27265170	1	50889510	DMRTA2	chr1:50884228-50891471	0.398204	0.0736217	0.324583	5.11332e-11	1.14553e-09		cg02970525	1	201915999	LMOD1		0.565568	0.243449	0.322119	2.54117e-11	1.31498e-08		cg04867733	1	77747987	AK5	chr1:77747314-77748224	0.550891	0.294699	0.256191	6.93611e-15	6.68923e-13		C21orf67|84536	1.17643	0.31415	7.06968e-27	1.24479e-25		CAMK2N2|94032	2.40753	1.09075	1.34e-19	1.26e-17		C1orf168|199920	1.42263	-1.06581	0.00014403	0.00036288
cg18198999	1	50890153	DMRTA2	chr1:50884228-50891471	0.456768	0.105588	0.35118	2.96394e-11	7.03165e-10		cg10327424	1	202611933	SYT2	chr1:202611668-202613039	0.443097	0.146228	0.296869	1.45137e-10	4.25226e-08		cg17445007	1	77748221	AK5	chr1:77747314-77748224	0.54761	0.278315	0.269294	2.37536e-09	4.58012e-08		C22orf41|644186	1.20971	-1.98308	1.75196e-09	7.42098e-09		CAMKV|79012	1.36534	-0.727767	0.00164471	0.00513728		C1orf173|127254	-2.16455	-2.32575	4.77e-07	1.73e-06
cg04431629	1	50890341	DMRTA2	chr1:50884228-50891471	0.449971	0.178643	0.271328	2.12447e-08	2.56952e-07		cg08925398	1	202937011	CYB5R1	chr1:202936045-202936252	0.342047	0.0899285	0.252118	4.1473e-08	2.75599e-06		cg27175634	1	77748728	AK5	chr1:77747314-77748224	0.57031	0.301702	0.268608	1.7475e-10	4.3684e-09		C2CD4A|145741	1.44974	4.9841	1.5717e-18	1.50785e-17		CAPN12|147968	-1.21462	4.29223	1.04e-13	2.94e-12		C1orf180|439927	-1.19513	-0.529274	1.93e-05	5.57e-05
cg20950465	1	53068181	GPX7	chr1:53067880-53068608	0.599645	0.273039	0.326606	7.05633e-19	1.32657e-16		cg01798157	1	203276595	BTG2	chr1:203274305-203275338	0.685513	0.312455	0.373059	1.26685e-10	3.85014e-08		cg03327649	1	78354235	NEXN	chr1:78354381-78354673	0.482551	0.193352	0.289199	2.08225e-14	1.69773e-12		C2CD4C|126567	2.29459	-0.0445342	3.45559e-52	3.23016e-50		CAPN13|92291	-1.46988	2.29211	5.22e-06	3.02e-05		C1orf190|541468	-1.17757	-0.817306	4.44e-16	5.16e-15
cg16557944	1	53068197	GPX7	chr1:53067880-53068608	0.552812	0.253594	0.299218	8.36541e-17	8.68759e-15		cg04148762	1	203598573	ATP2B4	chr1:203598471-203598853	0.472839	0.155589	0.31725	2.43716e-13	6.29298e-10		cg20967975	1	78354382	NEXN	chr1:78354381-78354673	0.466175	0.150341	0.315835	2.09557e-15	2.45151e-13		C2orf54|79919	-1.20618	4.00167	1.68627e-08	6.45788e-08		CAPN9|10753	-1.89968	4.22735	3.54e-10	4.82e-09		C1orf194|127003	-1.27248	-2.65888	0.00154059	0.0032816
cg17088631	1	53098857	FAM159A	chr1:53098629-53099303	0.484246	0.199024	0.285222	4.36801e-16	3.73805e-14		cg17721249	1	203598594	ATP2B4	chr1:203598471-203598853	0.513003	0.177903	0.3351	6.05865e-10	1.15681e-07		cg20943338	1	78354406	NEXN	chr1:78354381-78354673	0.567381	0.242821	0.32456	1.24861e-17	3.31693e-15		C2orf65|130951	3.97766	-0.946107	1.17114e-65	2.75126e-63		CAPS|828	-1.22135	3.17221	8.63e-10	1.1e-08		C1orf230|284485	-2.42559	-0.94922	3.2e-11	2.04e-10
cg11279444	1	53099053	FAM159A	chr1:53098629-53099303	0.697121	0.434674	0.262447	1.20175e-10	2.46868e-09		cg15732851	1	203598761	ATP2B4	chr1:203598471-203598853	0.701601	0.245852	0.455749	2.54229e-11	1.31498e-08		cg19359627	1	78354760	NEXN	chr1:78354381-78354673	0.41264	0.122418	0.290222	1.06649e-14	9.68594e-13		C2orf85|285093	2.15423	-3.24575	1.466e-17	1.31066e-16		CARD17|440068	2.13555	-3.07109	6.71e-08	5.86e-07		C1orf70|339453	-1.38646	-1.0027	1.02e-17	1.45e-16
cg01394819	1	53527665	PODN	chr1:53527572-53528974	0.74728	0.267058	0.480222	4.32106e-21	1.48218e-18		cg21397588	1	203598954	ATP2B4	chr1:203598471-203598853	0.505973	0.215291	0.290683	2.39213e-11	1.27093e-08		cg06914015	1	78354839	NEXN	chr1:78354381-78354673	0.497079	0.121245	0.375834	1.48744e-13	8.96116e-12		C2orf89|129293	-1.08358	6.8677	5.13846e-23	6.76564e-22		CARNS1|57571	1.28116	0.215008	2.8e-09	3.2e-08		C1orf88|128344	-1.78258	1.03802	4.76e-10	2.61e-09
cg13764106	1	53527693	PODN	chr1:53527572-53528974	0.645407	0.212025	0.433382	5.98532e-20	1.50545e-17		cg02457623	1	203599089	ATP2B4	chr1:203598471-203598853	0.429813	0.167959	0.261854	1.18246e-09	1.8796e-07		cg17870792	1	82266841	LPHN2	chr1:82265998-82269048	0.552014	0.165546	0.386468	5.51841e-14	3.85705e-12		C3|718	1.15348	7.08412	5.07016e-12	2.75229e-11		CARTPT|9607	1.90794	-2.11792	0.00010547	0.00045053		C1orf95|375057	-2.97957	0.770803	2.96e-20	5.68e-19
cg17104425	1	53528224	PODN	chr1:53527572-53528974	0.590021	0.304073	0.285948	5.962e-14	2.80345e-12		cg04913057	1	204120825	ETNK2	chr1:204120398-204121109	0.476804	0.167895	0.308909	1.94221e-10	5.17823e-08		cg07212035	1	82266912	LPHN2	chr1:82265998-82269048	0.413641	0.124075	0.289566	3.87998e-13	2.04402e-11		C3AR1|719	1.52389	2.94928	7.21887e-35	2.18081e-33		CASQ2|845	1.1428	-1.12829	0.00124784	0.00402638		C1QTNF2|114898	-1.02382	0.602035	1.03e-13	8.95e-13
cg01132471	1	53556482	SLC1A7	chr1:53558388-53558642	0.685931	0.395125	0.290806	1.45546e-21	5.69894e-19		cg17042926	1	204797566	NFASC	chr1:204797610-204797930	0.423006	0.139063	0.283943	1.11849e-10	3.52824e-08		cg07104652	1	82267165	LPHN2	chr1:82265998-82269048	0.671056	0.300924	0.370132	2.83368e-21	3.90165e-18		C3orf14|57415	-1.33667	1.69115	5.53259e-08	2.00566e-07		CASS4|57091	1.38332	0.398736	3.83e-12	7.98e-11		C1QTNF3|114899	-1.62075	3.48699	2.22e-27	1.09e-25
cg21812476	1	53990555	GLIS1		0.739948	0.481831	0.258117	1.23312e-20	3.82611e-18		cg24085946	1	204797839	NFASC	chr1:204797610-204797930	0.506663	0.208212	0.298451	1.31534e-11	8.50985e-09		cg02996869	1	82267171	LPHN2	chr1:82265998-82269048	0.670505	0.247281	0.423223	5.49131e-18	1.69345e-15		C3orf32|51066	-1.32964	2.22983	1.76158e-08	6.73187e-08		CAV1|857	1.18012	5.38173	3.42e-12	7.22e-11		C1QTNF7|114905	-2.44193	0.935444	1.11e-30	9.02e-29
cg08526412	1	54520114	C1orf83;TMEM59	chr1:54518601-54519299	0.437935	0.147059	0.290876	2.36205e-10	4.53656e-09		cg15460899	1	205039083	CNTN2	chr1:205038784-205039153	0.830094	0.578654	0.251441	6.64682e-08	3.9726e-06		cg21783729	1	82267682	LPHN2	chr1:82265998-82269048	0.493334	0.145737	0.347597	4.51113e-15	4.67659e-13		C3orf45|132228	-3.2234	-0.419696	1.08554e-10	5.20581e-10		CAV2|858	1.28515	4.52315	5.42e-11	8.78e-10		C1QTNF8|390664	2.03519	-2.5928	9.28e-10	4.91e-09
cg20793071	1	54520450	C1orf83;TMEM59	chr1:54518601-54519299	0.543001	0.2672	0.275801	5.84405e-13	2.11282e-11		cg10993336	1	207627941	CR2	chr1:207627531-207628280	0.481144	0.183384	0.29776	2.90283e-08	2.09636e-06		cg19744908	1	82267923	LPHN2	chr1:82265998-82269048	0.562938	0.251457	0.311481	1.58705e-16	2.67804e-14		C3orf55|152078	-1.00954	-1.11778	0.00186691	0.00363091		CBFA2T3|863	-1.35478	4.00806	2.51e-06	1.56e-05		C1R|715	-1.16543	8.01335	4.74e-21	1.01e-19
cg22537280	1	54723213	SSBP3	chr1:54723696-54724019	0.844914	0.272579	0.572335	1.09105e-23	7.4414e-21		cg05831823	1	207627978	CR2	chr1:207627531-207628280	0.431593	0.1424	0.289193	1.8695e-08	1.49151e-06		cg02243785	1	82267931	LPHN2	chr1:82265998-82269048	0.637963	0.270317	0.367646	3.68469e-20	2.88169e-17		C3orf65|646600	-1.07635	-2.84172	1.82825e-05	4.81724e-05		CBLN2|147381	-1.33695	-1.87743	3.6e-06	2.16e-05		C1S|716	-1.39542	8.36464	8.19e-27	3.67e-25
cg20568390	1	54723340	SSBP3	chr1:54723696-54724019	0.886878	0.436215	0.450664	9.12454e-32	3.11164e-28		cg23810846	1	207628383	CR2	chr1:207627531-207628280	0.455569	0.205351	0.250218	1.50261e-07	7.52011e-06		cg14562832	1	82268007	LPHN2	chr1:82265998-82269048	0.529815	0.179432	0.350382	9.77175e-18	2.73456e-15		C3orf66|677779	-2.40471	-3.1607	2.55174e-10	1.17723e-09		CBX6|23466	1.47125	3.45603	1.36e-15	5.63e-14		C20orf103|24141	-1.83243	1.69465	2.2e-17	2.99e-16
cg00838829	1	54723426	SSBP3	chr1:54723696-54724019	0.859899	0.383393	0.476506	1.82551e-25	1.83349e-22		cg09084829	1	211307408	KCNH1	chr1:211306667-211307675	0.555953	0.246834	0.309118	3.82124e-10	8.28903e-08		cg06940482	1	82268181	LPHN2	chr1:82265998-82269048	0.440596	0.168722	0.271874	1.54228e-16	2.62058e-14		C3orf67|200844	-1.54336	1.82664	4.89877e-12	2.66492e-11		CCBE1|147372	2.55837	-1.25892	7.18e-21	9.11e-19		C20orf112|140688	-1.0106	6.33828	1.21e-28	7.24e-27
cg16505550	1	57045708	PPAP2B	chr1:57044102-57045117	0.665326	0.362649	0.302678	1.23966e-14	7.05402e-13		cg06582752	1	211307674	KCNH1	chr1:211306667-211307675	0.462763	0.0975569	0.365206	2.83106e-12	3.16536e-09		cg20863963	1	82268281	LPHN2	chr1:82265998-82269048	0.538763	0.195418	0.343344	2.3234e-15	2.66796e-13		C3orf72|401089	2.03342	-2.43163	1.20349e-08	4.6762e-08		CCDC102B|79839	1.09095	0.769483	2.03e-12	4.49e-11		C20orf117|140710	-1.11153	3.53985	5.18e-17	6.77e-16
cg06836772	1	57110403	PRKAA2	chr1:57110663-57111337	0.577614	0.156858	0.420756	1.67359e-14	9.21735e-13		cg11398511	1	215256635	KCNK2	chr1:215256051-215256636	0.715545	0.442378	0.273168	1.90754e-06	5.46114e-05		cg10992267	1	82268588	LPHN2	chr1:82265998-82269048	0.55626	0.202842	0.353418	5.50259e-15	5.54291e-13		C4BPB|725	1.33758	2.78046	9.39535e-20	9.80962e-19		CCDC141|285025	2.73926	-0.676442	1.32e-12	3.01e-11		C20orf123|128506	-1.26537	-3.01609	0.00010299	0.00026627
cg09763175	1	57110722	PRKAA2	chr1:57110663-57111337	0.473849	0.094654	0.379195	6.51135e-11	1.42318e-09		cg24700959	1	216896861	ESRRG		0.47518	0.190983	0.284197	9.44411e-07	3.12681e-05		cg22518696	1	82268591	LPHN2	chr1:82265998-82269048	0.619963	0.239757	0.380206	1.6912e-14	1.4228e-12		C4orf39|152756	-1.17166	-2.60276	7.4336e-07	2.34404e-06		CCDC151|115948	1.20081	-2.25333	1e-07	8.34e-07		C20orf152|140894	-1.28343	-2.62093	1.73e-05	5.02e-05
cg19083779	1	57110724	PRKAA2	chr1:57110663-57111337	0.421519	0.0758839	0.345635	1.2069e-12	4.01857e-11		cg01926051	1	217309178	ESRRG	chr1:217307744-217309179	0.576925	0.236965	0.33996	5.30831e-10	1.0541e-07		cg12130328	1	82269019	LPHN2	chr1:82265998-82269048	0.611237	0.317475	0.293763	1.07593e-14	9.75407e-13		C4orf47|441054	1.47394	-2.55807	9.58951e-13	5.58966e-12		CCDC155|147872	1.52513	-3.03899	0.00720818	0.0188296		C20orf165|128497	-1.52777	-0.477242	1.17e-16	1.46e-15
cg04876835	1	57111099	PRKAA2	chr1:57110663-57111337	0.568338	0.13542	0.432918	1.71748e-16	1.6405e-14		cg01558923	1	218520959	TGFB2	chr1:218519057-218519674	0.54642	0.272158	0.274262	9.46331e-09	8.94413e-07		cg13559233	1	82269258	LPHN2	chr1:82265998-82269048	0.55385	0.141318	0.412532	4.6841e-13	2.40205e-11		C4orf7|260436	2.41999	0.114997	1.5433e-14	1.06965e-13		CCDC160|347475	3.15348	-1.86381	7.03e-11	1.12e-09		C20orf186|149954	-1.8723	-3.18282	0.00123973	0.00268572
cg12167830	1	57111108	PRKAA2	chr1:57110663-57111337	0.425762	0.0915919	0.33417	3.14356e-18	4.92748e-16		cg19720265	1	220700883	MARK1	chr1:220701507-220702348	0.46505	0.200104	0.264946	4.6692e-09	5.24661e-07		cg05787193	1	84543369	PRKACB	chr1:84543146-84544261	0.403108	0.0663331	0.336775	7.37711e-14	4.95995e-12		C5AR1|728	1.52641	3.10128	4.57743e-47	3.16765e-45		CCDC33|80125	-1.51486	-2.45595	1.59e-05	8.27e-05		C20orf194|25943	-1.0427	2.92316	7.63e-15	7.6e-14
cg26068551	1	57111117	PRKAA2	chr1:57110663-57111337	0.621291	0.139322	0.481969	4.69631e-17	5.22898e-15		cg07420190	1	220702225	MARK1	chr1:220701507-220702348	0.560783	0.169652	0.391131	2.41244e-10	5.9605e-08		cg07161166	1	84543374	PRKACB	chr1:84543146-84544261	0.34679	0.051948	0.294842	2.76283e-11	8.48274e-10		C5orf39|389289	1.42526	0.4516	1.44411e-42	7.28338e-41		CCDC60|160777	-3.43709	1.05644	3.13e-14	9.94e-13		C20orf200|253868	-2.49328	-1.07662	4.67e-16	5.42e-15
cg09686317	1	57111122	PRKAA2	chr1:57110663-57111337	0.533924	0.123468	0.410456	5.09124e-17	5.62388e-15		cg14231871	1	220702321	MARK1	chr1:220701507-220702348	0.471694	0.16967	0.302024	5.43128e-09	5.8669e-07		cg15704369	1	84543558	PRKACB	chr1:84543146-84544261	0.432057	0.08184	0.350217	7.53866e-11	2.05704e-09		C5orf4|10826	-1.23082	3.48452	6.66968e-17	5.68403e-16		CCDC67|159989	-1.95503	-2.75752	2.04e-07	1.61e-06		C20orf201|198437	-1.72958	-2.98664	0.00021529	0.00052752
cg09935045	1	57111199	PRKAA2	chr1:57110663-57111337	0.516184	0.143903	0.372281	1.11051e-14	6.40229e-13		cg14154859	1	220702826	MARK1	chr1:220701507-220702348	0.515629	0.261169	0.25446	4.93273e-09	5.45289e-07		cg16374471	1	84543951	PRKACB	chr1:84543146-84544261	0.502458	0.0581996	0.444258	6.12098e-12	2.2428e-10		C5orf46|389336	1.88708	-1.46092	5.27725e-17	4.53854e-16		CCDC8|83987	1.04562	0.991229	1.26e-09	1.55e-08		C20orf203|284805	-1.07343	-3.11897	5.82e-05	0.00015582
cg20160351	1	58555364	DAB1		0.562513	0.302323	0.260191	4.19534e-12	1.21797e-10		cg18704691	1	221052468	HLX	chr1:221051966-221053673	0.557839	0.268009	0.28983	1.27797e-07	6.64415e-06		cg23698058	1	84544097	PRKACB	chr1:84543146-84544261	0.41656	0.0774607	0.339099	9.26901e-13	4.35289e-11		C5orf48|389320	-2.90445	-2.79399	2.39341e-19	2.43626e-18		CCDC80|151887	1.58334	4.42079	1.01e-17	6.1e-16		C20orf56|140828	1.43577	5.72738	1.56e-07	6.04e-07
cg18348836	1	60282400	HOOK1	chr1:60280624-60281048	0.718808	0.417465	0.301343	1.55847e-12	5.05937e-11		cg23027583	1	221052558	HLX	chr1:221051966-221053673	0.428481	0.167079	0.261402	3.7531e-07	1.53044e-05		cg00341980	1	84544220	PRKACB	chr1:84543146-84544261	0.417415	0.162983	0.254432	1.18507e-10	3.08799e-09		C5orf52|100190949	-1.75765	-0.92172	7.51304e-15	5.33563e-14		CCDC88A|55704	1.3651	3.24003	2.36e-18	1.62e-16		C20orf85|128602	-3.61351	-2.17615	8.76e-10	4.65e-09
cg11540204	1	60391699	CYP2J2	chr1:60392272-60392583	0.742332	0.38474	0.357592	9.23699e-16	7.25492e-14		cg18800479	1	221052579	HLX	chr1:221051966-221053673	0.409516	0.148088	0.261429	2.47162e-07	1.10836e-05		cg10879116	1	85358477	LPAR3	chr1:85358359-85359187	0.523241	0.176227	0.347015	2.09187e-14	1.70463e-12		C6orf103|79747	-4.83681	-2.10566	2.0494e-41	9.2868e-40		CCIN|881	1.13702	-2.82613	1.05e-06	7.08e-06		C21orf34|388815	-2.48825	-1.2928	2.02e-35	3.53e-33
cg24740868	1	60539362	C1orf87	chr1:60539315-60539540	0.587149	0.207973	0.379176	5.83727e-16	4.82914e-14		cg09580567	1	221052705	HLX	chr1:221051966-221053673	0.397102	0.106853	0.29025	1.06023e-08	9.75648e-07		cg01144693	1	85359106	LPAR3	chr1:85358359-85359187	0.428292	0.149263	0.279029	5.74582e-14	3.99908e-12		C6orf123|26238	-1.67432	1.35192	1.59245e-18	1.52612e-17		CCK|885	3.38709	0.761471	1e-12	2.36e-11		C21orf49|54067	-1.64962	-1.47272	9.87e-19	1.57e-17
cg00914726	1	60539400	C1orf87	chr1:60539315-60539540	0.574661	0.167401	0.40726	3.74836e-12	1.10261e-10		cg19099796	1	221052718	HLX	chr1:221051966-221053673	0.367531	0.0963972	0.271134	5.70152e-08	3.53727e-06		cg13554207	1	85359134	LPAR3	chr1:85358359-85359187	0.569095	0.261127	0.307968	1.01959e-12	4.72463e-11		C6orf138|442213	-1.5526	0.155646	6.62413e-07	2.10627e-06		CCKAR|886	3.89868	-3.19189	9.08e-12	1.75e-10		C21orf56|84221	-1.04654	2.99382	8.24e-08	3.3e-07
cg15628917	1	60539559	C1orf87	chr1:60539315-60539540	0.365335	0.0660498	0.299285	1.74113e-10	3.44909e-09		cg04683240	1	221052886	HLX	chr1:221051966-221053673	0.431371	0.108223	0.323148	1.02986e-07	5.60673e-06		cg15639684	1	85464110	MCOLN2	chr1:85463884-85464167	0.469356	0.169666	0.29969	3.40277e-14	2.56632e-12		C6orf142|90523	1.30211	-3.24291	1.76001e-06	5.29991e-06		CCL13|6357	1.83663	1.47591	1.04e-09	1.3e-08		C21orf62|56245	-1.05884	-2.32797	0.00010972	0.00028206
cg09851465	1	60539671	C1orf87	chr1:60539315-60539540	0.510511	0.161098	0.349413	3.55171e-12	1.04993e-10		cg12405785	1	221053409	HLX	chr1:221051966-221053673	0.516591	0.168872	0.347718	2.56768e-07	1.14097e-05		cg06402325	1	85464166	MCOLN2	chr1:85463884-85464167	0.382513	0.11922	0.263293	1.74617e-12	7.50233e-11		C6orf147|387097	1.07105	-1.65172	1.04024e-05	2.83895e-05		CCL18|6362	2.91404	5.0503	4.88e-26	2.41e-23		C22orf41|644186	1.34217	-1.93994	1.25e-09	6.48e-09
cg17238766	1	60539675	C1orf87	chr1:60539315-60539540	0.484922	0.188011	0.296911	2.65058e-12	8.09068e-11		cg15356516	1	221053513	HLX	chr1:221051966-221053673	0.504931	0.17329	0.331642	9.28162e-07	3.08743e-05		cg20431191	1	86043795	DDAH1	chr1:86042229-86042935	0.582106	0.159887	0.42222	2.82061e-11	8.64206e-10		C6orf15|29113	-3.54129	1.4112	8.18364e-16	6.33886e-15		CCL2|6347	1.42068	3.44796	4.52e-16	2.01e-14		C2CD4A|145741	1.80671	5.00686	2.71e-21	5.96e-20
cg05539515	1	62784269	KANK4	chr1:62784136-62785133	0.509829	0.188779	0.32105	3.06531e-17	3.59881e-15		cg26562772	1	221890431	DUSP10		0.725584	0.41445	0.311134	4.75849e-13	9.41703e-10		cg00183684	1	86043834	DDAH1	chr1:86042229-86042935	0.564649	0.293598	0.271051	1.89317e-10	4.69849e-09		C6orf154|221424	1.91709	0.474089	2.38746e-32	6.0291e-31		CCL21|6366	1.39556	3.48155	2.21e-06	1.39e-05		C2CD4B|388125	1.02205	3.03585	4.14e-06	1.32e-05
cg08845123	1	62784332	KANK4	chr1:62784136-62785133	0.56161	0.198536	0.363074	1.30634e-22	6.928e-20		cg13357903	1	222790952	MIA3	chr1:222790947-222791220	0.323049	0.0662987	0.256751	3.23302e-06	8.26877e-05		cg16683160	1	87617710	LOC339524	chr1:87617692-87617986	0.628399	0.286413	0.341986	5.06145e-13	2.57188e-11		C6orf165|154313	1.36011	-2.27203	1.09854e-16	9.21246e-16		CCL24|6369	-2.18635	3.98347	1.07e-16	5.37e-15		C2orf40|84417	-2.80931	-0.424883	4.07e-18	5.99e-17
cg09588271	1	62784651	KANK4	chr1:62784136-62785133	0.590639	0.0647592	0.52588	1.91715e-17	2.37239e-15		cg04232325	1	223537363	SUSD4	chr1:223536842-223538628	0.389398	0.0772082	0.31219	2.58351e-07	1.14644e-05		cg04246763	1	87617811	LOC339524	chr1:87617692-87617986	0.596543	0.275122	0.321421	1.89543e-11	6.07458e-10		C6orf204|387119	1.69728	-0.710291	5.17229e-40	2.1426e-38		CCL25|6370	1.69578	0.560284	0.00090009	0.00301142		C2orf65|130951	2.37676	-0.377305	1.11e-21	2.54e-20
cg07558455	1	62784762	KANK4	chr1:62784136-62785133	0.479164	0.0696043	0.409559	3.97057e-15	2.58714e-13		cg10856813	1	223537435	SUSD4	chr1:223536842-223538628	0.395094	0.140483	0.25461	8.99516e-08	5.03832e-06		cg04550823	1	87617916	LOC339524	chr1:87617692-87617986	0.537943	0.285268	0.252675	2.54125e-11	7.87865e-10		C6orf25|80739	-1.22962	-2.76305	1.50114e-06	4.55573e-06		CCL3|6348	2.02931	3.45405	4.4e-24	1.1e-21		C2orf74|339804	-1.02928	0.865485	1.45e-10	8.56e-10
cg16028201	1	62784802	KANK4	chr1:62784136-62785133	0.479539	0.0410997	0.43844	7.91082e-14	3.60257e-12		cg21447550	1	223538623	SUSD4	chr1:223536842-223538628	0.474736	0.221772	0.252964	7.30938e-08	4.29162e-06		cg05382305	1	91869782	HFM1	chr1:91869876-91870390	0.389453	0.114477	0.274976	3.4778e-08	5.1827e-07		C6orf52|347744	1.1508	-1.23709	1.87124e-12	1.06398e-11		CCL3L1|6349	1.95287	2.24015	3.53e-11	5.96e-10		C2orf84|653140	-1.21198	-2.30174	5.21e-09	2.5e-08
cg06372391	1	62785079	KANK4	chr1:62784136-62785133	0.330307	0.0332473	0.29706	1.00379e-08	1.31223e-07		cg17482224	1	225116995	DNAH14	chr1:225117220-225117781	0.741058	0.487394	0.253664	7.92294e-08	4.56251e-06		cg11794649	1	91869877	HFM1	chr1:91869876-91870390	0.390082	0.109576	0.280506	4.77646e-10	1.08105e-08		C6orf58|352999	2.62409	-3.25347	1.16872e-23	1.62132e-22		CCL3L3|414062	1.89325	-1.04025	1.13e-05	6.07e-05		C3|718	-1.4315	8.90744	1.71e-10	9.99e-10
cg06912182	1	63787586	FOXD3	chr1:63782394-63790471	0.568438	0.168257	0.40018	5.93065e-16	4.89535e-14		cg25552768	1	226077287	LEFTY1	chr1:226075150-226075680	0.746634	0.48154	0.265094	9.04649e-11	3.06719e-08		cg15482792	1	91870014	HFM1	chr1:91869876-91870390	0.486345	0.0706674	0.415677	7.79313e-11	2.12095e-09		C6orf59|79992	1.00627	-2.76582	9.8303e-06	2.69187e-05		CCL4|6351	1.94266	3.37402	4.25e-30	8.4e-27		C3orf14|57415	-1.2392	1.53347	3.32e-09	1.63e-08
cg02595809	1	63787670	FOXD3	chr1:63782394-63790471	0.385493	0.0817113	0.303782	1.67132e-11	4.19011e-10		cg18564989	1	226411057	MIXL1	chr1:226411007-226411880	0.445577	0.146704	0.298874	3.45915e-10	7.71485e-08		cg23032045	1	91870067	HFM1	chr1:91869876-91870390	0.534083	0.146955	0.387129	8.37112e-11	2.26001e-09		C6orf97|80129	-1.75955	3.12437	5.82308e-21	6.58425e-20		CCL4L2|388372	1.74199	3.42472	1.79e-13	4.83e-12		C3orf66|677779	-2.04397	-3.40391	3.48e-07	1.29e-06
cg11248715	1	63787928	FOXD3	chr1:63782394-63790471	0.316834	0.0201917	0.296643	3.44144e-09	5.01836e-08		cg24405179	1	226411259	MIXL1	chr1:226411007-226411880	0.341553	0.0471888	0.294364	2.95446e-09	3.72653e-07		cg25188594	1	91870362	HFM1	chr1:91869876-91870390	0.640968	0.275625	0.365343	1.66246e-13	9.86562e-12		C7orf13|129790	-1.40574	3.18916	2.76703e-22	3.47416e-21		CCL5|6352	1.74451	5.0709	6.41e-20	6.33e-18		C3orf67|200844	-1.36165	1.59378	5.56e-09	2.66e-08
cg15462232	1	63788184	FOXD3	chr1:63782394-63790471	0.35795	0.0342429	0.323707	1.20088e-10	2.46734e-09		cg26886972	1	226411270	MIXL1	chr1:226411007-226411880	0.323594	0.039682	0.283912	1.10993e-08	1.00998e-06		cg10890233	1	91870382	HFM1	chr1:91869876-91870390	0.602559	0.170573	0.431986	5.5823e-12	2.06941e-10		C7orf31|136895	-1.01512	2.33114	1.18397e-17	1.06653e-16		CCL7|6354	2.71976	-1.30992	3.76e-18	2.47e-16		C3orf72|401089	1.04033	-2.04462	0.00905234	0.0164627
cg26789332	1	63788255	FOXD3	chr1:63782394-63790471	0.359752	0.0505042	0.309247	1.19051e-11	3.09584e-10		cg15147516	1	226411868	MIXL1	chr1:226411007-226411880	0.335895	0.0803089	0.255586	1.20053e-08	1.07083e-06		cg27594756	1	91870389	HFM1	chr1:91869876-91870390	0.633391	0.22983	0.403561	2.34742e-13	1.32929e-11		C7orf36|57002	-1.37417	4.7673	2.14226e-40	8.97837e-39		CCL8|6355	2.67514	1.13891	1.72e-24	5.02e-22		C3P1|388503	-2.20985	-0.394517	0.00042783	0.00100048
cg23620340	1	63788424	FOXD3	chr1:63782394-63790471	0.382403	0.0787346	0.303668	1.46107e-11	3.7125e-10		cg20841596	1	226736405	C1orf95	chr1:226736354-226737412	0.396737	0.05175	0.344987	4.13506e-11	1.84865e-08		cg18146737	1	92946700	GFI1	chr1:92945907-92952609	0.719968	0.466042	0.253926	2.06063e-19	1.14457e-16		C7orf4|64433	-2.05427	-2.68946	8.88377e-17	7.49579e-16		CCNJL|79616	-1.06342	3.80986	1.06e-06	7.18e-06		C4BPA|722	-1.51148	3.79313	3.29e-05	9.14e-05
cg12690148	1	63788429	FOXD3	chr1:63782394-63790471	0.513831	0.102952	0.410879	7.1368e-12	1.95302e-10		cg15592945	1	226736711	C1orf95	chr1:226736354-226737412	0.524792	0.195803	0.328989	3.0787e-09	3.8438e-07		cg12876356	1	92946825	GFI1	chr1:92945907-92952609	0.658106	0.395555	0.262551	7.68565e-19	3.3895e-16		C7orf52|375607	-2.25968	-1.50171	3.27659e-12	1.81396e-11		CCR1|1230	1.58974	3.0088	1.61e-20	1.84e-18		C4orf39|152756	-1.94764	-2.22707	1.05e-16	1.32e-15
cg10097295	1	63789341	FOXD3	chr1:63782394-63790471	0.414317	0.140176	0.274141	7.19318e-19	1.34958e-16		cg03745431	1	226736713	C1orf95	chr1:226736354-226737412	0.546483	0.230686	0.315797	2.00126e-10	5.26861e-08		cg18316974	1	92947035	GFI1	chr1:92945907-92952609	0.859431	0.542604	0.316827	4.30854e-23	1.31624e-19		C8G|733	1.82584	0.893303	1.11043e-15	8.49425e-15		CCR10|2826	1.11012	-0.204671	4.06e-05	0.00019157		C5orf13|9315	-1.04486	5.42732	6.15e-28	3.33e-26
cg15841063	1	63789500	FOXD3	chr1:63782394-63790471	0.519622	0.204924	0.314698	4.78426e-14	2.31651e-12		cg01318248	1	226736816	C1orf95	chr1:226736354-226737412	0.400619	0.10907	0.291549	3.54123e-11	1.67814e-08		cg09935388	1	92947588	GFI1	chr1:92945907-92952609	0.801128	0.450116	0.351011	8.76877e-24	3.67156e-20		C8orf33|65265	-1.29299	7.13863	2.22295e-36	7.3908e-35		CCR2|729230	1.04789	0.967226	1.73e-05	8.91e-05		C5orf23|79614	-2.44222	1.95174	8.67e-20	1.58e-18
cg24052817	1	64355752	ROR1		0.772243	0.453993	0.318251	1.23183e-15	9.36162e-14		cg16705351	1	226737245	C1orf95	chr1:226736354-226737412	0.40823	0.104932	0.303298	3.61735e-10	7.98089e-08		cg14179389	1	92947961	GFI1	chr1:92945907-92952609	0.591028	0.183381	0.407647	1.59942e-16	2.69598e-14		C8orf45|157777	-2.04514	1.47066	3.98421e-34	1.13091e-32		CCR5|1234	1.36808	2.73378	1.02e-14	3.57e-13		C5orf27|202299	-2.12353	-1.68466	2.06e-08	9.08e-08
cg00463746	1	64434320	ROR1		0.697415	0.390048	0.307367	2.12616e-12	6.63919e-11		cg07046852	1	226737341	C1orf95	chr1:226736354-226737412	0.526193	0.201118	0.325076	4.11034e-12	4.01822e-09		cg01206378	1	95698827	RWDD3	chr1:95699725-95700142	0.685136	0.389142	0.295993	6.2323e-11	1.73777e-09		C8orf51|78998	-1.4137	0.950414	2.69995e-24	3.92229e-23		CCRL1|51554	1.00425	1.62189	6.95e-05	0.00031043		C5orf38|153571	1.06647	0.620591	0.00066484	0.00150536
cg24306340	1	64937451	CACHD1	chr1:64935554-64936614	0.479721	0.207695	0.272026	8.11617e-12	2.19563e-10		cg06641299	1	228136127	WNT9A	chr1:228134422-228136282	0.37794	0.116141	0.261799	6.66547e-09	6.79465e-07		cg06990379	1	98386209	DPYD	chr1:98386189-98386724	0.309049	0.0403801	0.268669	1.09463e-09	2.27406e-08		C8orf75|619351	1.77902	-2.2445	8.63113e-16	6.67678e-15		CD109|135228	3.04809	4.92149	1.59e-27	9.41e-25		C5orf4|10826	-2.01724	4.07547	2.53e-31	2.36e-29
cg08856601	1	65730351	DNAJC6	chr1:65731411-65731849	0.429458	0.169262	0.260196	3.77579e-08	4.29788e-07		cg11647690	1	228136256	WNT9A	chr1:228134422-228136282	0.578133	0.325538	0.252595	5.46249e-07	2.04209e-05		cg22602002	1	101000000	GPR88	chr1:101004471-101005885	0.632156	0.37929	0.252866	6.91146e-11	1.90307e-09		C8orf77|286103	-1.34085	-0.206567	6.2454e-20	6.58237e-19		CD14|929	1.48112	5.88848	7.65e-28	5.44e-25		C5orf40|408263	-1.1305	-2.69994	1.62e-06	5.46e-06
cg09235539	1	65730481	DNAJC6	chr1:65731411-65731849	0.485497	0.173196	0.312301	6.45004e-11	1.41197e-09		cg09511896	1	228246937	WNT3A	chr1:228246631-228247197	0.589868	0.316469	0.273399	3.48531e-07	1.44475e-05		cg05160678	1	102000000	S1PR1	chr1:101701785-101702068	0.447508	0.107446	0.340062	1.82668e-12	7.80708e-11		C8ORFK29|340393	-1.57569	0.916754	1.40909e-09	6.03742e-09		CD163|9332	2.08176	4.71496	7.04e-22	1.05e-19		C5orf48|389320	-2.0916	-3.26299	4.78e-09	2.31e-08
cg09082287	1	65730494	DNAJC6	chr1:65731411-65731849	0.528557	0.202037	0.326519	1.65307e-11	4.14895e-10		cg26841013	1	228248013	WNT3A	chr1:228246631-228247197	0.676644	0.255679	0.420965	5.71334e-09	6.07977e-07		cg20740769	1	102000000	S1PR1	chr1:101701785-101702068	0.40161	0.0902524	0.311358	6.05055e-11	1.69159e-09		C9orf128|392307	-1.2044	-1.80658	2.46883e-07	8.25131e-07		CD209|30835	1.15262	2.93097	7.93e-09	8.31e-08		C5orf49|134121	-1.21581	-2.71757	4.63e-07	1.68e-06
cg24550010	1	65731107	DNAJC6	chr1:65731411-65731849	0.654426	0.388276	0.26615	4.13839e-13	1.55721e-11		cg11176493	1	228248237	WNT3A	chr1:228246631-228247197	0.428505	0.151948	0.276557	7.87397e-08	4.55203e-06		cg02628801	1	102000000	S1PR1	chr1:101701785-101702068	0.431028	0.0502986	0.380729	4.26633e-14	3.11247e-12		C9orf139|401563	1.49494	-2.16633	5.97423e-20	6.30774e-19		CD226|10666	1.24485	-0.216056	4.13e-10	5.56e-09		C5orf52|100190949	-1.23405	-1.40274	9.3e-07	3.25e-06
cg26615127	1	65731432	DNAJC6	chr1:65731411-65731849	0.657828	0.307272	0.350555	5.23654e-14	2.50531e-12		cg01907584	1	228604413	TRIM17	chr1:228603706-228604567	0.642882	0.318885	0.323997	8.83917e-07	2.9742e-05		cg05338680	1	102000000	S1PR1	chr1:101701785-101702068	0.528508	0.124723	0.403785	3.3237e-15	3.60089e-13		C9orf172|389813	-1.07256	1.81291	2.32872e-08	8.79751e-08		CD274|29126	2.07589	1.61913	3.1e-22	5.11e-20		C6|729	-5.09762	2.04242	1.02e-18	1.61e-17
cg00920348	1	66999304	SGIP1	chr1:66998728-66999060	0.539759	0.254343	0.285417	2.11738e-12	6.6174e-11		cg03432338	1	231176985	FAM89A	chr1:231176785-231177009	0.435271	0.153367	0.281903	4.5705e-08	2.97144e-06		cg25012864	1	102000000	S1PR1	chr1:101701785-101702068	0.554952	0.0761748	0.478777	6.62421e-15	6.43498e-13		C9orf173|441476	-1.01998	-1.83365	7.33863e-05	0.000177467		CD300A|11314	1.4408	3.32987	2.22e-17	1.25e-15		C6orf103|79747	-4.46467	-2.518	1.16e-26	5.01e-25
cg25203031	1	66999813	SGIP1	chr1:66998728-66999060	0.557059	0.269115	0.287944	6.19895e-11	1.36149e-09		cg09308842	1	231297968	TRIM67	chr1:231297812-231299777	0.518747	0.20432	0.314428	3.47272e-08	2.40204e-06		cg04156369	1	102000000	S1PR1	chr1:101702445-101702745	0.540485	0.228055	0.31243	8.59259e-19	3.70588e-16		C9orf57|138240	-1.27656	-3.08143	2.75977e-05	7.08658e-05		CD300C|10871	1.29089	0.537863	1.09e-14	3.78e-13		C6orf123|26238	-1.5611	1.16112	6.78e-14	6.03e-13
cg00318756	1	67773020	IL12RB2	chr1:67773329-67773767	0.432193	0.133631	0.298561	5.49915e-14	2.6122e-12		cg09150076	1	231298004	TRIM67	chr1:231297812-231299777	0.512864	0.179658	0.333206	3.82785e-10	8.29111e-08		cg18323466	1	102000000	S1PR1	chr1:101702445-101702745	0.656149	0.394278	0.26187	7.94199e-10	1.70787e-08		C9orf66|157983	1.4041	-1.57307	4.33865e-15	3.16043e-14		CD300E|342510	2.23607	-1.95214	8.07e-12	1.57e-10		C6orf138|442213	-1.12321	-0.267761	1.76e-06	5.91e-06
cg06952660	1	67773044	IL12RB2	chr1:67773329-67773767	0.565713	0.203378	0.362334	4.33269e-15	2.79392e-13		cg13881199	1	231298177	TRIM67	chr1:231297812-231299777	0.486479	0.22646	0.26002	5.12835e-10	1.03068e-07		cg21385047	1	102000000	S1PR1	chr1:101702445-101702745	0.501952	0.234117	0.267835	1.90136e-08	2.98913e-07		C9orf70|84850	1.00181	-2.02926	0.00105569	0.00214064		CD300LF|146722	1.46033	1.80775	3.67e-15	1.38e-13		C6orf145|221749	-1.25028	4.14106	8.21e-33	9.7e-31
cg27416067	1	67773128	IL12RB2	chr1:67773329-67773767	0.542975	0.167943	0.375031	5.33397e-15	3.37067e-13		cg06714284	1	235812840	GNG4	chr1:235811841-235814066	0.439751	0.0527674	0.386984	4.24082e-10	8.90501e-08		cg00066671	1	102000000	OLFM3		0.423367	0.170957	0.25241	3.96217e-11	1.16445e-09		C9orf71|169693	-6.29589	1.63748	4.01158e-46	2.65269e-44		CD33|945	1.23257	0.67539	1.47e-11	2.69e-10		C6orf147|387097	1.24591	-1.63368	4.42e-08	1.85e-07
cg00993824	1	67773175	IL12RB2	chr1:67773329-67773767	0.411183	0.12286	0.288323	1.00022e-13	4.43851e-12		cg11696475	1	235813272	GNG4	chr1:235811841-235814066	0.366376	0.0679715	0.298405	3.63208e-09	4.35487e-07		cg02861071	1	102000000	OLFM3		0.47807	0.219954	0.258116	9.67873e-13	4.52645e-11		CA1|759	-1.95699	3.85325	4.01865e-05	0.000100941		CD37|951	1.05075	3.38124	1.39e-08	1.38e-07		C6orf15|29113	-5.01432	2.67575	1.02e-26	4.52e-25
cg15991072	1	67773404	IL12RB2	chr1:67773329-67773767	0.481598	0.153691	0.327906	3.10187e-13	1.21003e-11		cg10840412	1	235813424	GNG4	chr1:235811841-235814066	0.506437	0.157164	0.349273	7.63539e-09	7.5728e-07		cg27229407	1	104000000	COL11A1		0.570056	0.278288	0.291767	2.1523e-10	5.27333e-09		CA10|56934	-1.62898	-3.00217	5.86588e-08	2.11788e-07		CD40|958	1.28221	3.69089	1.14e-12	2.65e-11		C6orf154|221424	1.36195	0.871035	2.33e-14	2.18e-13
cg20803547	1	67773440	IL12RB2	chr1:67773329-67773767	0.536885	0.178242	0.358642	8.18568e-14	3.7116e-12		cg20285514	1	235813444	GNG4	chr1:235811841-235814066	0.42746	0.0869904	0.34047	3.77488e-08	2.56269e-06		cg02361557	1	108000000	NTNG1	chr1:107682889-107684463	0.601836	0.285861	0.315975	3.16767e-17	7.11334e-15		CA14|23632	1.20128	-1.53427	2.68838e-16	2.17976e-15		CD53|963	1.28919	4.91395	6.68e-14	1.95e-12		C6orf155|79940	-1.35861	-2.68201	1.33e-09	6.9e-09
cg00147943	1	68225713	GNG12		0.72383	0.449452	0.274377	3.24938e-15	2.16731e-13		cg18563326	1	235813452	GNG4	chr1:235811841-235814066	0.385896	0.0747572	0.311139	5.67858e-08	3.52613e-06		cg18200760	1	108000000	NTNG1	chr1:107682889-107684463	0.555093	0.185721	0.369372	7.80076e-17	1.49626e-14		CA4|762	-2.03473	4.34675	2.69779e-07	8.96119e-07		CD7|924	1.55835	3.40853	2.26e-15	8.92e-14		C6orf174|387104	-1.35648	1.70709	2.59e-11	1.67e-10
cg27516652	1	68904571	RPE65		0.829118	0.455224	0.373893	1.25556e-31	4.00246e-28		cg17816394	1	235814009	GNG4	chr1:235811841-235814066	0.515633	0.204454	0.311179	2.29288e-08	1.75482e-06		cg07155336	1	108000000	NTNG1	chr1:107682889-107684463	0.70419	0.306025	0.398165	2.40087e-17	5.65102e-15		CA6|765	2.18192	-1.56228	4.41542e-07	1.42994e-06		CD70|970	2.6656	2.38421	5.18e-13	1.28e-11		C6orf176|90632	-1.14115	-1.70916	6.8e-05	0.00018021
cg23647191	1	71513494	PTGER3	chr1:71512224-71513804	0.40756	0.0990198	0.30854	1.62148e-14	8.9653e-13		cg09649610	1	235814039	GNG4	chr1:235811841-235814066	0.542922	0.213204	0.329718	9.22644e-09	8.75736e-07		cg01559617	1	108000000	NTNG1	chr1:107682889-107684463	0.525469	0.201024	0.324445	3.95923e-20	3.01999e-17		CA7|766	1.58872	1.44584	3.8577e-09	1.58116e-08		CD72|971	1.12434	1.46314	1.49e-10	2.21e-09		C6orf186|728464	-1.78876	-1.56569	4.46e-16	5.19e-15
cg12739034	1	71513626	PTGER3	chr1:71512224-71513804	0.477685	0.149325	0.32836	4.55894e-16	3.88558e-14		cg00043510	1	235814134	GNG4	chr1:235814280-235814488	0.633345	0.284307	0.349038	1.04113e-08	9.61798e-07		cg09508770	1	108000000	NTNG1	chr1:107682889-107684463	0.582903	0.235014	0.34789	3.29864e-17	7.38482e-15		CA8|767	2.21887	3.03188	5.83832e-22	7.16408e-21		CD74|972	1.51339	10.8251	9.29e-19	6.85e-17		C6orf192|116843	1.08017	4.39762	1.28e-32	1.47e-30
cg03726881	1	71513726	PTGER3	chr1:71512224-71513804	0.590724	0.273281	0.317443	6.72294e-15	4.12485e-13		cg02780849	1	235814163	GNG4	chr1:235814280-235814488	0.520825	0.233185	0.28764	3.36964e-07	1.40694e-05		cg06368118	1	108000000	NTNG1	chr1:107682889-107684463	0.664274	0.248932	0.415341	8.15296e-23	2.36739e-19		CA9|768	1.77265	6.07222	2.16993e-12	1.22563e-11		CD80|941	1.19826	0.366638	4.09e-12	8.48e-11		C6orf218|221718	-1.21386	-3.35179	0.00292004	0.00587593
cg00915178	1	71513733	PTGER3	chr1:71512224-71513804	0.560913	0.232464	0.328448	1.62674e-14	8.98885e-13		cg24454695	1	235814326	GNG4	chr1:235814280-235814488	0.572267	0.283192	0.289074	3.68066e-12	3.73511e-09		cg27587125	1	109000000	C1orf59	chr1:109203593-109204378	0.368162	0.1107	0.257461	1.18734e-07	1.57772e-06		CAB39L|81617	-2.64106	5.00608	2.45129e-47	1.73672e-45		CD84|8832	1.62587	1.7803	5.86e-15	2.13e-13		C6orf52|347744	1.3188	-1.20176	7.48e-13	5.8e-12
cg20785136	1	71513789	PTGER3	chr1:71512224-71513804	0.476363	0.156227	0.320136	1.8906e-16	1.78e-14		cg22941646	1	235814339	GNG4	chr1:235814280-235814488	0.61297	0.240311	0.372659	3.78853e-11	1.73879e-08		cg12465704	1	110000000	SYPL2	chr1:110008962-110010124	0.454408	0.113045	0.341362	3.14322e-11	9.51664e-10		CACNA1D|776	-1.04522	4.24997	2.81009e-14	1.89899e-13		CD86|942	1.61738	2.93692	9.46e-24	2.21e-21		C6orf58|352999	2.09576	-3.09781	5.65e-12	3.95e-11
cg04645342	1	72748124	NEGR1	chr1:72748471-72749736	0.606213	0.205312	0.400902	3.58024e-15	2.36646e-13		cg13455717	1	235814365	GNG4	chr1:235814280-235814488	0.61113	0.211523	0.399608	9.62294e-12	6.95496e-09		cg12515325	1	110000000	SYPL2	chr1:110008962-110010124	0.384575	0.11276	0.271815	1.49469e-11	4.92147e-10		CACNA1E|777	1.25864	0.19077	4.1876e-06	1.20221e-05		CD8A|925	1.69088	3.50898	1.74e-15	7.09e-14		C6orf97|80129	-1.21302	2.5633	4.64e-10	2.55e-09
cg05352161	1	72748139	NEGR1	chr1:72748471-72749736	0.473915	0.158475	0.315439	9.93997e-16	7.72411e-14		cg06173536	1	235814462	GNG4	chr1:235814280-235814488	0.632712	0.207375	0.425337	1.09431e-12	1.67154e-09		cg20591472	1	110000000	SYPL2	chr1:110008962-110010124	0.703648	0.279012	0.424637	9.83844e-24	3.82265e-20		CACNA1S|779	-1.25264	-3.3156	3.68121e-05	9.30149e-05		CD96|10225	1.04387	2.3879	2.14e-08	2.06e-07		C7|730	-2.69126	4.36901	3.06e-18	4.57e-17
cg17517900	1	72748607	NEGR1	chr1:72748471-72749736	0.318701	0.0624954	0.256206	1.44791e-09	2.31398e-08		cg23237976	1	236318493	GPR137B		0.968967	0.707128	0.261839	3.90042e-09	4.58477e-07		cg07589691	1	110000000	SYPL2	chr1:110008962-110010124	0.498994	0.117016	0.381977	2.12379e-13	1.21818e-11		CACNA2D2|9254	-1.13773	1.95681	5.45381e-08	1.97951e-07		CDC20B|166979	-2.04913	-2.30699	8.18e-05	0.00035853		C7orf10|79783	-1.42791	1.42288	2.68e-20	5.18e-19
cg01425670	1	72749015	NEGR1	chr1:72748471-72749736	0.378464	0.0496283	0.328836	1.58003e-13	6.65881e-12		cg13068215	1	240286481	FMN2		0.635319	0.328845	0.306473	1.28616e-10	3.8824e-08		cg13673164	1	110000000	SYPL2	chr1:110008962-110010124	0.552793	0.133934	0.418859	5.52211e-15	5.55766e-13		CACNG4|27092	-2.91337	2.47113	3.01002e-14	2.02694e-13		CDH2|1000	1.48158	0.316776	3.06e-11	5.23e-10		C7orf13|129790	-1.05108	2.82223	1.49e-11	9.93e-11
cg26153364	1	72749064	NEGR1	chr1:72748471-72749736	0.466307	0.0736105	0.392697	5.09992e-15	3.23881e-13		cg00816406	1	240286626	FMN2		0.67122	0.397562	0.273658	1.29066e-08	1.13431e-06		cg07571041	1	110000000	SYPL2	chr1:110008962-110010124	0.533563	0.167445	0.366118	1.69703e-15	2.03059e-13		CACNG6|59285	4.83969	-2.09956	5.80779e-37	1.98264e-35		CDH7|1005	-1.64743	-2.38244	1.06e-05	5.74e-05		C7orf16|10842	-4.0379	-2.42199	4.8e-10	2.63e-09
cg23714541	1	72749581	NEGR1	chr1:72748471-72749736	0.440559	0.0730188	0.367541	2.46665e-14	1.29713e-12		cg09107161	1	240774736	GREM2		0.630432	0.331505	0.298927	2.35068e-11	1.2603e-08		cg23472215	1	110000000	GSTM3	chr1:110282351-110283306	0.455762	0.119692	0.336069	1.2491e-12	5.61257e-11		CADM1|23705	1.04321	2.64572	1.35579e-11	7.06137e-11		CDHR1|92211	-1.54199	5.8683	1.05e-05	5.72e-05		C7orf4|64433	-1.52655	-3.04113	4.44e-08	1.86e-07
cg04985396	1	72749735	NEGR1	chr1:72748471-72749736	0.527264	0.121321	0.405944	1.84737e-16	1.74489e-14		cg07808348	1	240775075	GREM2		0.387749	0.0895866	0.298162	2.82016e-07	1.2264e-05		cg25027501	1	110000000	GSTM3	chr1:110282351-110283306	0.473526	0.138014	0.335512	2.14528e-13	1.22811e-11		CADM2|253559	-1.90213	-2.84524	2.44879e-05	6.3354e-05		CDKN2A|1029	1.28295	3.13207	4.61e-06	2.71e-05		C7orf52|375607	-2.04639	-1.76016	3.37e-09	1.65e-08
cg19411474	1	75600224	LHX8	chr1:75600674-75601415	0.651866	0.392988	0.258878	6.20146e-09	8.52228e-08		cg18278247	1	245319261	KIF26B	chr1:245316547-245320247	0.457284	0.201506	0.255778	4.21892e-05	0.000620609		cg18935813	1	111000000	KCNA2	chr1:111148983-111150186	0.491768	0.137562	0.354206	3.06962e-14	2.35543e-12		CADPS|8618	-1.56714	4.27562	2.00295e-11	1.02997e-10		CDO1|1036	1.01119	-1.99052	0.00012487	0.00052325		C8A|731	-8.01566	1.32336	1.09e-11	7.33e-11
cg17868936	1	76053565	SLC44A5		0.570471	0.302283	0.268187	2.36983e-11	5.74772e-10		cg07978304	1	245321642	KIF26B	chr1:245316547-245320247	0.865083	0.590748	0.274335	1.9751e-10	5.22586e-08		cg14208112	1	111000000	KCNA2	chr1:111148983-111150186	0.535301	0.159772	0.37553	7.81249e-13	3.74565e-11		CALB1|793	4.57025	3.69717	3.70823e-28	7.06581e-27		CDX2|1045	-1.10046	7.5053	2.4e-11	4.21e-10		C8B|732	-9.39834	1.70877	5.54e-15	5.61e-14
cg04867733	1	77747987	AK5	chr1:77747314-77748224	0.550891	0.285551	0.26534	2.23775e-16	2.06052e-14		cg26109154	1	245411604	KIF26B		0.465604	0.214882	0.250722	3.34177e-06	8.48759e-05		cg25281171	1	111000000	KCNA2	chr1:111148983-111150186	0.475714	0.151116	0.324598	4.73748e-11	1.36068e-09		CALB2|794	3.02781	1.53729	1.33383e-38	5.02408e-37		CEACAM16|388551	-1.51497	-3.09442	2.63e-05	0.00012944		C8orf42|157695	-1.27269	1.74149	6.34e-11	3.88e-10
cg27175634	1	77748728	AK5	chr1:77747314-77748224	0.57031	0.303729	0.266581	2.34728e-10	4.51088e-09		cg20609679	1	246671665	SMYD3	chr1:246670148-246670768	0.8236	0.557747	0.265854	1.39092e-08	1.19207e-06		cg23658744	1	112000000	C1orf103	chr1:111505881-111507007	0.378054	0.116106	0.261949	1.93922e-09	3.81234e-08		CALCA|796	-3.70695	0.0799205	1.61583e-22	2.05771e-21		CEACAM21|90273	1.02741	-0.37239	2.58e-08	2.44e-07		C8orf45|157777	-1.3724	0.796985	6.78e-14	6.03e-13
cg03327649	1	78354235	NEXN	chr1:78354381-78354673	0.482551	0.176579	0.305972	2.1546e-15	1.5146e-13		cg18126557	1	247611842	NLRP3	chr1:247614695-247614944	0.551513	0.279544	0.271969	3.20649e-10	7.3068e-08		cg16524830	1	112000000	C1orf103	chr1:111505881-111507007	0.332639	0.0764762	0.256163	3.16376e-10	7.45385e-09		CALCB|797	-2.36127	2.83688	0.000670156	0.00140171		CEACAM4|1089	1.40593	-1.50876	6.85e-09	7.26e-08		C8orf46|254778	-1.59322	-2.19291	1.21e-08	5.53e-08
cg20967975	1	78354382	NEXN	chr1:78354381-78354673	0.466175	0.108288	0.357887	3.76013e-18	5.73754e-16		cg25602756	1	247611881	NLRP3	chr1:247614695-247614944	0.585562	0.284688	0.300874	2.50746e-10	6.11795e-08		cg04879281	1	112000000	C1orf103	chr1:111505881-111507007	0.507981	0.124477	0.383504	2.92094e-12	1.17703e-10		CALHM3|119395	1.03972	-2.38885	0.000592671	0.00125077		CEACAM5|1048	-1.19443	11.9189	1e-11	1.91e-10		C8orf48|157773	-1.19359	-1.24712	8.69e-15	8.61e-14
cg20943338	1	78354406	NEXN	chr1:78354381-78354673	0.567381	0.20147	0.36591	2.87978e-20	7.97517e-18		cg19023876	1	247611931	NLRP3	chr1:247614695-247614944	0.597106	0.319459	0.277647	4.35674e-09	4.98333e-07		cg15566506	1	112000000	C1orf103	chr1:111505881-111507007	0.501534	0.174981	0.326553	1.12483e-11	3.8332e-10		CALML3|810	-2.63917	-0.0833075	6.26152e-22	7.66953e-21		CEACAM7|1087	-1.06496	7.3108	0.00196503	0.00599867		C8orf51|78998	-1.08479	0.606794	2.36e-11	1.53e-10
cg19359627	1	78354760	NEXN	chr1:78354381-78354673	0.41264	0.100228	0.312412	6.70733e-16	5.45961e-14		cg26718707	10	518370	DIP2C	chr10:518192-518471	0.539018	0.260871	0.278147	1.81837e-06	5.25351e-05		cg02030493	1	112000000	C1orf88	chr1:111889138-111889539	0.38456	0.0875873	0.296973	2.66325e-10	6.39015e-09		CALML5|51806	5.50722	-1.99989	1.5841e-33	4.33781e-32		CEACAM8|1088	-1.58787	0.621886	9.53e-05	0.00041096		C8orf75|619351	1.52846	-2.06499	4.77e-09	2.3e-08
cg06914015	1	78354839	NEXN	chr1:78354381-78354673	0.497079	0.10311	0.393969	2.68851e-14	1.39627e-12		cg00332951	10	518470	DIP2C	chr10:518192-518471	0.78525	0.478974	0.306276	5.83695e-09	6.17323e-07		cg21926138	1	112000000	C1orf88	chr1:111889138-111889539	0.462809	0.160623	0.302186	1.59725e-12	6.93463e-11		CALN1|83698	-1.41624	-3.32181	4.89634e-05	0.000121534		CECR2|27443	-1.57018	-0.332829	4.57e-08	4.09e-07		C8orf84|157869	1.08686	4.00468	1.43e-05	4.22e-05
cg03000585	1	78355339	NEXN	chr1:78354381-78354673	0.496863	0.242622	0.25424	2.21517e-10	4.28193e-09		cg12639192	10	1166782	WDR37		0.804623	0.497092	0.307531	3.14175e-14	1.77192e-10		cg10394832	1	112000000	C1orf88	chr1:111889138-111889539	0.545706	0.233278	0.312427	1.40817e-14	1.22474e-12		CAMK1G|57172	1.207	-1.67955	1.71845e-17	1.52719e-16		CECR7|100130418	1.51626	-1.52431	7.1e-05	0.00031642		C8orf85|441376	-1.8819	-1.69997	2.71e-14	2.51e-13
cg17870792	1	82266841	LPHN2	chr1:82265998-82269048	0.552014	0.149969	0.402044	1.12861e-14	6.49392e-13		cg15087907	10	3169259	PFKP		0.760148	0.492331	0.267816	3.17713e-07	1.34765e-05		cg23923856	1	113000000	WNT2B	chr1:113050813-113052301	0.533575	0.130864	0.402711	8.48564e-14	5.57406e-12		CAMK2A|815	1.05606	-2.01497	1.26047e-11	6.586e-11		CEL|1056	-2.88316	3.94383	9.45e-13	2.23e-11		C8orf86|389649	-3.48624	-3.28418	3.95e-07	1.45e-06
cg07212035	1	82266912	LPHN2	chr1:82265998-82269048	0.413641	0.123582	0.290059	3.56934e-13	1.3698e-11		cg01134643	10	5406948	UCN3		0.578085	0.264434	0.313651	4.66452e-11	1.98194e-08		cg14186963	1	113000000	WNT2B	chr1:113050813-113052301	0.454891	0.0926414	0.362249	1.03243e-11	3.55049e-10		CAMK2N2|94032	2.83968	0.408827	4.05346e-69	1.14874e-66		CELA3A|10136	2.63182	-2.67663	4.43e-08	3.98e-07		C9|735	-8.32274	2.76328	1.42e-19	2.51e-18
cg07104652	1	82267165	LPHN2	chr1:82265998-82269048	0.671056	0.278841	0.392215	3.77528e-23	2.26289e-20		cg27349333	10	5406971	UCN3		0.540195	0.250368	0.289827	4.16094e-10	8.78548e-08		cg08739433	1	113000000	WNT2B	chr1:113050813-113052301	0.494333	0.23772	0.256613	5.47768e-12	2.03738e-10		CAMKV|79012	-1.64737	1.04636	1.51959e-06	4.60624e-06		CELA3B|23436	1.69258	-3.26466	4.8e-05	0.00022261		C9orf44|158314	-1.46879	-3.07358	1.59e-08	7.12e-08
cg02996869	1	82267171	LPHN2	chr1:82265998-82269048	0.670505	0.226361	0.444144	2.83731e-19	5.93521e-17		cg12428514	10	5407119	UCN3		0.635874	0.315125	0.320749	1.64683e-08	1.35557e-06		cg11806528	1	113000000	WNT2B	chr1:113050813-113052301	0.483493	0.197689	0.285804	5.58349e-13	2.80298e-11		CAMP|820	1.52899	-3.20835	1.44873e-10	6.85728e-10		CELP|1057	-1.99002	1.58838	1.34e-05	7.09e-05		C9orf47|286223	-1.21699	-2.05428	8.69e-10	4.62e-09
cg21783729	1	82267682	LPHN2	chr1:82265998-82269048	0.493334	0.134258	0.359076	1.0716e-15	8.24868e-14		cg03672342	10	8094093	FLJ45983	chr10:8091374-8098329	0.705709	0.369081	0.336628	2.67071e-10	6.36848e-08		cg13501090	1	115000000	DENND2C	chr1:115212239-115212985	0.409646	0.152316	0.257331	5.93753e-10	1.31174e-08		CAPN13|92291	-1.87929	3.00018	1.58077e-17	1.40904e-16		CEND1|51286	1.09859	-1.78492	2.76e-07	2.11e-06		C9orf57|138240	-1.02334	-3.24116	0.0093411	0.0169534
cg19744908	1	82267923	LPHN2	chr1:82265998-82269048	0.562938	0.227292	0.335646	2.48041e-18	4.01017e-16		cg05721515	10	8095288	FLJ45983;GATA3	chr10:8091374-8098329	0.551364	0.257713	0.293651	2.35903e-07	1.06959e-05		cg16124571	1	115000000	DENND2C	chr1:115212239-115212985	0.329852	0.0338956	0.295956	9.02876e-09	1.52565e-07		CAPN14|440854	2.1073	-1.04307	1.61931e-15	1.22349e-14		CEP170|9859	1.07874	4.3982	7.54e-18	4.69e-16		C9orf71|169693	-4.39497	-0.338418	2.07e-23	5.94e-22
cg02243785	1	82267931	LPHN2	chr1:82265998-82269048	0.637963	0.252672	0.385292	1.59603e-21	6.20791e-19		cg06870728	10	8095363	FLJ45983;GATA3	chr10:8091374-8098329	0.594178	0.342399	0.251779	1.00487e-05	0.00020177		cg14521523	1	115000000	DENND2C	chr1:115212239-115212985	0.295313	0.0270306	0.268282	1.87646e-08	2.95347e-07		CAPN3|825	-1.46288	3.02627	3.10746e-17	2.70373e-16		CEP170L|645455	1.27711	-0.176769	0.00052783	0.00188251		CA1|759	-1.73438	3.57068	0.00060665	0.00138203
cg14562832	1	82268007	LPHN2	chr1:82265998-82269048	0.529815	0.170558	0.359256	2.75821e-18	4.40108e-16		cg11731114	10	8096064	FLJ45983;GATA3	chr10:8091374-8098329	0.551035	0.282848	0.268187	6.44946e-06	0.000142441		cg22487624	1	115000000	DENND2C	chr1:115212239-115212985	0.277538	0.0212518	0.256286	2.57132e-08	3.93153e-07		CAPN6|827	-1.79124	4.21434	2.57945e-07	8.58725e-07		CERCAM|51148	1.3104	4.77929	3.61e-20	3.82e-18		CA10|56934	-2.64573	-2.53084	2.6e-11	1.68e-10
cg06940482	1	82268181	LPHN2	chr1:82265998-82269048	0.440596	0.184101	0.256495	5.13132e-15	3.25523e-13		cg09728012	10	8096305	FLJ45983;GATA3	chr10:8091374-8098329	0.49234	0.226699	0.26564	7.45752e-07	2.60278e-05		cg00209951	1	115000000	DENND2C	chr1:115212239-115212985	0.307919	0.0346938	0.273225	1.70321e-08	2.70429e-07		CAPS|828	-2.08813	4.25082	9.11905e-24	1.27695e-22		CFC1B|653275	-4.05735	-1.57781	7.52e-14	2.18e-12		CA14|23632	1.14852	-1.40634	2.03e-10	1.17e-09
cg20863963	1	82268281	LPHN2	chr1:82265998-82269048	0.538763	0.258836	0.279926	2.1237e-11	5.20892e-10		cg24647276	10	8096311	FLJ45983;GATA3	chr10:8091374-8098329	0.517684	0.244726	0.272958	1.07691e-06	3.47105e-05		cg25035908	1	115000000	DENND2C	chr1:115212239-115212985	0.328727	0.0323404	0.296387	9.15101e-09	1.54408e-07		CARD11|84433	-1.01068	4.24721	3.48674e-05	8.83888e-05		CFH|3075	1.44558	4.5203	4.13e-20	4.27e-18		CA4|762	-1.20916	3.54535	0.00492111	0.00948405
cg10992267	1	82268588	LPHN2	chr1:82265998-82269048	0.55626	0.213497	0.342764	4.14865e-14	2.0411e-12		cg05356738	10	8096319	FLJ45983;GATA3	chr10:8091374-8098329	0.446966	0.193628	0.253338	6.59242e-07	2.36501e-05		cg15934415	1	115000000	DENND2C	chr1:115212239-115212985	0.389191	0.0355789	0.353612	1.1718e-08	1.92841e-07		CARNS1|57571	1.02637	0.0563777	1.49788e-09	6.39942e-09		CFHR1|3078	1.43421	0.146267	0.0131845	0.0315998		CA5A|763	-3.41859	-3.18908	8.29e-08	3.32e-07
cg22518696	1	82268591	LPHN2	chr1:82265998-82269048	0.619963	0.25796	0.362002	2.29408e-13	9.25827e-12		cg19894747	10	8096386	FLJ45983;GATA3	chr10:8091374-8098329	0.481915	0.198583	0.283332	3.70907e-07	1.51544e-05		cg23620052	1	115000000	DENND2C	chr1:115212239-115212985	0.289571	0.0375862	0.251985	3.0552e-07	3.69599e-06		CASKIN1|57524	1.4547	-1.59851	1.05941e-10	5.08325e-10		CFTR|1080	-1.47777	7.08981	7.11e-12	1.4e-10		CA6|765	1.62074	-1.23357	0.0011754	0.00255395
cg12130328	1	82269019	LPHN2	chr1:82265998-82269048	0.611237	0.34945	0.261787	5.20101e-12	1.47589e-10		cg04982951	10	8096635	FLJ45983;GATA3	chr10:8091374-8098329	0.583102	0.330907	0.252195	3.06255e-06	7.92276e-05		cg25979559	1	116000000	NHLH2	chr1:116380359-116382364	0.446464	0.155039	0.291425	1.06623e-11	3.65601e-10		CASQ2|845	-1.02914	0.090122	0.00342873	0.00637805		CGB1|114335	-1.87446	-2.91696	0.0110782	0.0272006		CA7|766	1.40204	1.66457	2.23e-05	6.35e-05
cg13559233	1	82269258	LPHN2	chr1:82265998-82269048	0.55385	0.156412	0.397438	1.61776e-12	5.22234e-11		cg13948050	10	11865142	C10orf47	chr10:11865125-11865984	0.463173	0.198212	0.264961	4.45144e-07	1.74369e-05		cg18438853	1	116000000	NHLH2	chr1:116380359-116382364	0.539975	0.284592	0.255383	8.23827e-11	2.22763e-09		CASS4|57091	1.46753	0.0441435	6.1799e-26	1.01226e-24		CHAD|1101	-1.59311	-0.0684634	8e-08	6.85e-07		CA8|767	1.85001	3.38559	5.34e-13	4.22e-12
cg13980528	1	82269522	LPHN2	chr1:82265998-82269048	0.33971	0.0805815	0.259129	2.83671e-08	3.3247e-07		cg03411288	10	11865805	C10orf47	chr10:11865125-11865984	0.408441	0.157017	0.251424	4.78693e-08	3.07601e-06		cg24106636	1	116000000	NHLH2	chr1:116380359-116382364	0.56635	0.152973	0.413377	4.12124e-14	3.02241e-12		CATSPERB|79820	1.34258	0.121862	1.82772e-13	1.14419e-12		CHI3L1|1116	1.64308	4.71646	1.1e-13	3.1e-12		CA9|768	1.38611	6.40187	5.97e-07	2.14e-06
cg03098721	1	84464084	TTLL7	chr1:84464223-84465232	0.716845	0.438246	0.278599	6.75559e-22	2.9179e-19		cg23214249	10	11978707	UPF2		0.814369	0.4777	0.33667	5.48348e-12	4.79283e-09		cg21646199	1	116000000	NHLH2	chr1:116380359-116382364	0.501652	0.199751	0.301902	1.18728e-13	7.42592e-12		CAV1|857	1.03475	5.18297	1.65127e-22	2.09984e-21		CHIT1|1118	3.02854	2.17688	8.65e-15	3.06e-13		CAB39L|81617	-2.20289	4.48038	3.1e-36	6.72e-34
cg17010394	1	84464224	TTLL7	chr1:84464223-84465232	0.409893	0.142558	0.267335	1.87705e-09	2.91807e-08		cg19576422	10	12256343	CDC123		0.541592	0.254228	0.287363	1.99929e-07	9.42373e-06		cg02126788	1	116000000	NHLH2	chr1:116380359-116382364	0.484085	0.178475	0.305611	2.10995e-13	1.21166e-11		CAV2|858	1.49774	4.10381	3.36104e-39	1.31886e-37		CHP2|63928	-1.56311	4.10473	3.62e-05	0.00017266		CACNA1B|774	-1.14232	-0.199215	0.00315952	0.00632089
cg05787193	1	84543369	PRKACB	chr1:84543146-84544261	0.403108	0.0337073	0.369401	5.61027e-15	3.52023e-13		cg22738219	10	13043313	CCDC3	chr10:13043094-13043781	0.493884	0.24278	0.251104	1.39297e-05	0.000260821		cg09478857	1	118000000	TRIM45	chr1:117664180-117665148	0.513423	0.237124	0.276299	1.24704e-10	3.23165e-09		CBFA2T2|9139	-1.05252	5.892	4.49648e-51	3.91611e-49		CHRD|8646	1.1224	1.32004	2.23e-12	4.86e-11		CACNA1E|777	1.00411	0.431099	0.00012028	0.00030683
cg07161166	1	84543374	PRKACB	chr1:84543146-84544261	0.34679	0.0287167	0.318073	3.34281e-12	9.95095e-11		cg22750254	10	13043421	CCDC3	chr10:13043094-13043781	0.576627	0.319999	0.256629	4.45539e-06	0.00010638		cg13898106	1	118000000	TRIM45	chr1:117664180-117665148	0.535963	0.201931	0.334032	1.01161e-17	2.80681e-15		CBFA2T3|863	1.48267	2.30072	1.74661e-16	1.43705e-15		CHRDL2|25884	1.87061	1.82341	7.25e-08	6.28e-07		CACNA1G|8913	-1.38366	-1.58599	1.38e-08	6.23e-08
cg15704369	1	84543558	PRKACB	chr1:84543146-84544261	0.432057	0.0634134	0.368643	1.92274e-11	4.75939e-10		cg13423980	10	13043887	CCDC3	chr10:13043094-13043781	0.39799	0.108339	0.289651	1.45518e-08	1.23594e-06		cg02623200	1	119000000	SPAG17	chr1:118727816-118728097	0.692773	0.426531	0.266242	1.2573e-11	4.22619e-10		CBLN1|869	-1.86593	1.21892	3.13811e-09	1.29934e-08		CHRM2|1129	2.25155	-2.64402	1.31e-06	8.65e-06		CACNA1S|779	-2.69804	-2.80771	1.16e-09	6.05e-09
cg16374471	1	84543951	PRKACB	chr1:84543146-84544261	0.502458	0.0407827	0.461675	2.27027e-12	7.03747e-11		cg24371910	10	13043933	CCDC3	chr10:13043094-13043781	0.392296	0.133743	0.258553	4.08846e-08	2.72751e-06		cg23257935	1	119000000	SPAG17	chr1:118727816-118728097	0.527213	0.239824	0.287389	3.61195e-14	2.70436e-12		CBLN2|147381	-1.79498	-1.2876	7.8209e-16	6.0737e-15		CHRNA3|1136	1.11279	0.176356	3.43e-08	3.16e-07		CACNA2D1|781	-1.82617	0.733093	2.81e-22	6.98e-21
cg23698058	1	84544097	PRKACB	chr1:84543146-84544261	0.41656	0.0557386	0.360821	1.16661e-13	5.07776e-12		cg05335944	10	13749010	FRMD4A		0.738807	0.437583	0.301223	1.76499e-10	4.8833e-08		cg02152120	1	119000000	SPAG17	chr1:118727816-118728097	0.536074	0.16131	0.374764	6.13872e-13	3.04471e-11		CBLN4|140689	-2.43404	-1.93533	6.22608e-07	1.98493e-06		CHRNA6|8973	-2.19889	-2.12065	1.05e-06	7.11e-06		CACNA2D2|9254	-1.68156	2.34157	4.02e-11	2.52e-10
cg00341980	1	84544220	PRKACB	chr1:84543146-84544261	0.417415	0.156125	0.26129	5.099e-11	1.14267e-09		cg09571858	10	17496221	ST8SIA6	chr10:17495407-17496721	0.482788	0.218046	0.264741	2.11461e-06	5.92382e-05		cg00310968	1	119000000	SPAG17	chr1:118727816-118728097	0.493104	0.135374	0.35773	6.28427e-14	4.31319e-12		CBR3|874	1.66991	2.69893	1.42042e-40	6.05256e-39		CHRNB2|1141	2.75693	0.101091	1.46e-11	2.68e-10		CACNG1|786	-1.87179	-3.27383	1.47e-05	4.31e-05
cg20426713	1	84763338	SAMD13	chr1:84764108-84764906	0.712419	0.391991	0.320428	4.57976e-13	1.70557e-11		cg20011402	10	17496239	ST8SIA6	chr10:17495407-17496721	0.532229	0.239343	0.292885	5.14012e-06	0.000119017		cg01105494	1	119000000	SPAG17	chr1:118727816-118728097	0.568553	0.2003	0.368253	5.84275e-15	5.82303e-13		CC2D2A|57545	-1.05044	2.60409	1.37693e-13	8.73001e-13		CHST11|50515	1.29404	2.26505	5.05e-18	3.26e-16		CACNG4|27092	-3.30612	2.69763	4.2e-16	4.91e-15
cg23238790	1	85157327	SSX2IP	chr1:85155605-85156574	0.772095	0.491922	0.280173	5.52552e-17	6.05533e-15		cg18408326	10	18429037	CACNB2	chr10:18429125-18430234	0.404908	0.125497	0.27941	3.46184e-10	7.71485e-08		cg26100099	1	119000000	SPAG17	chr1:118727816-118728097	0.536304	0.218351	0.317953	2.33604e-13	1.32388e-11		CCBE1|147372	1.91833	-1.5517	6.16897e-20	6.5095e-19		CHST15|51363	1.37807	4.07614	1.1e-15	4.57e-14		CACNG6|59285	3.31492	-1.73286	5.58e-13	4.4e-12
cg10879116	1	85358477	LPAR3	chr1:85358359-85359187	0.523241	0.160107	0.363134	2.84623e-15	1.9297e-13		cg15985191	10	18429357	CACNB2	chr10:18429125-18430234	0.337236	0.0729688	0.264268	8.23609e-08	4.69931e-06		cg16240368	1	119000000	SPAG17	chr1:118727816-118728097	0.680375	0.321483	0.358892	1.58041e-17	4.02341e-15		CCDC109B|55013	1.44931	3.8644	1.5467e-48	1.16518e-46		CHST5|23563	-1.10616	5.55423	1.07e-05	5.78e-05		CACNG7|59284	-2.0518	-2.61822	1.85e-05	5.34e-05
cg01144693	1	85359106	LPAR3	chr1:85358359-85359187	0.428292	0.173468	0.254824	2.46902e-12	7.58859e-11		cg09835225	10	18429643	CACNB2	chr10:18429125-18430234	0.381003	0.0700758	0.310928	1.37364e-08	1.18174e-06		cg19084726	1	145000000	PDE4DIP	chr1:145075483-145075845	0.563893	0.251655	0.312238	2.89105e-19	1.51406e-16		CCDC135|84229	1.03526	-3.24533	0.000204544	0.000463326		CIB4|130106	-4.51939	-1.7631	9.89e-13	2.33e-11		CADM2|253559	-2.62409	-2.54545	6.99e-14	6.21e-13
cg13554207	1	85359134	LPAR3	chr1:85358359-85359187	0.569095	0.25069	0.318405	3.8974e-13	1.47791e-11		cg20185017	10	18429661	CACNB2	chr10:18429125-18430234	0.338594	0.0446138	0.29398	1.28683e-08	1.13162e-06		cg11935147	1	145000000	PDE4DIP	chr1:145075483-145075845	0.623101	0.372146	0.250955	5.19402e-21	6.29463e-18		CCDC141|285025	3.13946	-1.32156	7.45855e-46	4.89577e-44		CIITA|4261	2.08548	4.78366	6.31e-19	4.88e-17		CADM3|57863	-2.08349	1.59741	2.03e-15	2.2e-14
cg15639684	1	85464110	MCOLN2	chr1:85463884-85464167	0.469356	0.142908	0.326448	1.25889e-15	9.54008e-14		cg02456226	10	18429703	CACNB2	chr10:18429125-18430234	0.380935	0.0914736	0.289462	1.68034e-08	1.37731e-06		cg21421098	1	145000000	ANKRD34A	chr1:145472980-145474702	0.34262	0.0773362	0.265284	9.91099e-11	2.6276e-09		CCDC152|100129792	-1.05119	1.6803	9.41346e-09	3.71257e-08		CILP|8483	2.9863	1.61677	2.72e-19	2.29e-17		CADPS|8618	-1.16927	3.86556	3.71e-06	1.19e-05
cg06402325	1	85464166	MCOLN2	chr1:85463884-85464167	0.382513	0.105371	0.277142	3.17135e-13	1.23369e-11		cg01805540	10	18429749	CACNB2	chr10:18429125-18430234	0.345405	0.0434015	0.302003	3.5673e-08	2.45415e-06		cg04816302	1	145000000	ANKRD34A	chr1:145472980-145474702	0.398708	0.107667	0.291041	8.86917e-14	5.77641e-12		CCDC155|147872	1.05012	-3.11566	0.00782444	0.013653		CILP2|148113	1.0592	0.445478	0.00080979	0.00274128		CALB1|793	2.86991	4.29998	7.22e-10	3.87e-09
cg23106912	1	85464261	MCOLN2	chr1:85462585-85463435	0.467359	0.209618	0.25774	2.31582e-14	1.22572e-12		cg01392544	10	18429760	CACNB2	chr10:18429125-18430234	0.339968	0.0349381	0.30503	1.12351e-08	1.01981e-06		cg13947666	1	145000000	ANKRD34A	chr1:145472980-145474702	0.324131	0.0433042	0.280826	3.63381e-10	8.46137e-09		CCDC160|347475	4.9917	-2.60815	1.23772e-51	1.11607e-49		CKB|1152	-2.5135	9.10194	9.64e-26	4.08e-23		CALCA|796	-3.72803	-0.0612472	1.01e-16	1.27e-15
cg26414000	1	85721327	C1orf52	chr1:85724701-85725524	0.551226	0.299853	0.251373	8.78986e-13	3.02494e-11		cg26272270	10	18430144	CACNB2	chr10:18429125-18430234	0.300854	0.04802	0.252834	1.59805e-08	1.32551e-06		cg13051071	1	145000000	ANKRD34A	chr1:145472980-145474702	0.517538	0.161401	0.356137	1.25823e-16	2.2216e-14		CCDC67|159989	-1.43597	-2.77091	6.58539e-05	0.000160207		CLCA1|1179	-3.36566	9.52932	1.53e-12	3.46e-11		CALCB|797	3.14482	-0.293632	1.66e-11	1.1e-10
cg17737388	1	85724454	C1orf52	chr1:85724701-85725524	0.488123	0.209896	0.278227	9.53076e-09	1.25219e-07		cg15701047	10	20106873	PLXDC2	chr10:20106643-20106946	0.414073	0.155542	0.258531	5.05017e-07	1.92225e-05		cg10178263	1	145000000	ANKRD34A	chr1:145472980-145474702	0.466301	0.173772	0.292529	6.01031e-14	4.15334e-12		CCDC68|80323	1.60226	3.67887	4.47505e-48	3.27449e-46		CLCA2|9635	-2.13317	0.115611	1.2e-06	8e-06		CALCR|799	-1.18461	-2.18426	0.00011684	0.00029878
cg20431191	1	86043795	DDAH1	chr1:86042229-86042935	0.582106	0.209739	0.372367	1.35037e-09	2.1736e-08		cg10540364	10	21783539	C10orf114	chr10:21783198-21786420	0.60066	0.251162	0.349497	6.44682e-10	1.21588e-07		cg18280463	1	145000000	ANKRD34A	chr1:145472980-145474702	0.361791	0.0657302	0.296061	4.27385e-11	1.24359e-09		CCDC83|220047	2.93461	-3.31302	1.13023e-16	9.46484e-16		CLCA4|22802	-1.23542	4.83768	0.00689726	0.018132		CALD1|800	-1.31853	8.30699	2.67e-24	8.67e-23
cg10593400	1	86044176	DDAH1	chr1:86042229-86042935	0.718937	0.44831	0.270627	5.05764e-13	1.85969e-11		cg22889755	10	21783855	C10orf114	chr10:21783198-21786420	0.580674	0.222184	0.35849	1.86972e-09	2.65414e-07		cg01229562	1	145000000	ANKRD34A	chr1:145472980-145474702	0.370106	0.0973791	0.272727	2.49684e-12	1.02586e-10		CCDC88A|55704	1.4148	2.89306	3.251e-41	1.45109e-39		CLDN18|51208	2.53936	6.31402	5.72e-06	3.28e-05		CALML3|810	-4.27172	1.28865	2.93e-20	5.64e-19
cg16683160	1	87617710	LOC339524	chr1:87617692-87617986	0.628399	0.363782	0.264617	7.17431e-09	9.70504e-08		cg05385047	10	21783930	C10orf114	chr10:21783198-21786420	0.38347	0.116419	0.267051	2.91445e-08	2.10164e-06		cg01000615	1	146000000	ANKRD35		0.505183	0.239475	0.265708	2.03065e-13	1.17163e-11		CCDC88B|283234	-1.50445	6.03367	1.78618e-15	1.34616e-14		CLDN8|9073	-2.68336	-0.057822	3.37e-06	2.03e-05		CALML5|51806	3.19477	-1.404	4.66e-08	1.94e-07
cg04246763	1	87617811	LOC339524	chr1:87617692-87617986	0.596543	0.327345	0.269198	9.90046e-09	1.29618e-07		cg04759335	10	21784250	C10orf114	chr10:21783198-21786420	0.514163	0.180061	0.334102	1.76684e-09	2.54006e-07		cg24629122	1	150000000	SV2A		0.475277	0.145485	0.329792	2.06833e-10	5.08886e-09		CCK|885	6.415	-0.209562	1.72167e-70	5.20996e-68		CLEC2A|387836	-2.241	-2.24111	0.00384284	0.0108932		CALN1|83698	-1.76892	-3.29393	4.2e-07	1.54e-06
cg06804564	1	90100070	LRRC8C	chr1:90098230-90099292	0.646154	0.363396	0.282759	3.73528e-14	1.8602e-12		cg00621240	10	21784314	C10orf114	chr10:21783198-21786420	0.489979	0.22323	0.266749	3.63363e-07	1.49126e-05		cg04927502	1	150000000	SV2A		0.472448	0.206381	0.266067	7.21014e-22	1.3216e-18		CCKBR|887	-2.27576	-2.97466	1.87495e-05	4.93519e-05		CLEC2B|9976	1.51004	2.3278	7.54e-16	3.22e-14		CAMK1D|57118	-1.04398	2.76013	7.75e-13	5.99e-12
cg05578673	1	90307339	LRRC8D	chr1:90308839-90309606	0.747251	0.452587	0.294664	1.10826e-13	4.85913e-12		cg12804278	10	23633326	C10orf67		0.453424	0.152445	0.300979	6.0271e-10	1.15454e-07		cg01705587	1	150000000	SV2A		0.527089	0.24308	0.284008	4.71652e-22	9.47427e-19		CCL13|6357	1.96409	0.982852	6.86426e-19	6.7486e-18		CLEC3A|10143	-3.85185	-2.45413	1.76e-08	1.71e-07		CAMK2B|816	-2.2019	-0.28753	4.08e-11	2.56e-10
cg11794649	1	91869877	HFM1	chr1:91869876-91870390	0.390082	0.0944261	0.295655	1.10476e-10	2.28911e-09		cg19677522	10	23633390	C10orf67		0.437068	0.132024	0.305045	1.05022e-10	3.39587e-08		cg07702853	1	150000000	C1orf51	chr1:150254365-150254637	0.565323	0.298369	0.266954	3.42089e-07	4.09396e-06		CCL18|6362	3.07262	4.34902	3.28268e-55	3.96007e-53		CLEC4A|50856	1.20076	1.37629	1.1e-11	2.07e-10		CAMK2N2|94032	1.99265	0.896837	3.46e-23	9.7e-22
cg15482792	1	91870014	HFM1	chr1:91869876-91870390	0.486345	0.0652632	0.421081	5.43891e-11	1.21098e-09		cg03397575	10	23633518	C10orf67		0.534854	0.162768	0.372087	5.41725e-12	4.77102e-09		cg06982544	1	150000000	C1orf51	chr1:150254365-150254637	0.618461	0.330135	0.288326	3.79171e-08	5.60804e-07		CCL24|6369	-1.22472	3.56793	2.72828e-09	1.13492e-08		CLEC4D|338339	2.16866	-1.91176	1.64e-12	3.68e-11		CAND2|23066	-1.6188	0.898166	1.24e-31	1.22e-29
cg23032045	1	91870067	HFM1	chr1:91869876-91870390	0.534083	0.103849	0.430234	2.74815e-12	8.35307e-11		cg18853376	10	23633759	C10orf67		0.414659	0.144994	0.269665	4.89128e-12	4.4149e-09		cg04065086	1	151000000	SEMA6C	chr1:151103685-151106100	0.540763	0.266431	0.274332	6.73278e-12	2.44407e-10		CCL26|10344	2.78941	-0.149857	8.90625e-42	4.19557e-40		CLEC4E|26253	2.10959	0.980421	3.04e-15	1.16e-13		CAPN13|92291	-1.38888	2.48245	6.02e-07	2.16e-06
cg25188594	1	91870362	HFM1	chr1:91869876-91870390	0.640968	0.290857	0.350111	8.37936e-13	2.90137e-11		cg23774717	10	26856095	APBB1IP	chr10:26855906-26856198	0.63667	0.263886	0.372785	1.43296e-09	2.17259e-07		cg07371589	1	151000000	SEMA6C	chr1:151103685-151106100	0.667288	0.301038	0.36625	1.0996e-10	2.88708e-09		CCL3|6348	2.17277	2.90885	5.52117e-57	7.64147e-55		CLEC4G|339390	2.27437	-2.21812	7.77e-12	1.51e-10		CAPN14|440854	1.21033	-0.53455	7.93e-05	0.00020819
cg10890233	1	91870382	HFM1	chr1:91869876-91870390	0.602559	0.229306	0.373254	6.43885e-10	1.11454e-08		cg16492341	10	26856105	APBB1IP	chr10:26855906-26856198	0.653354	0.274369	0.378985	1.06104e-09	1.73261e-07		cg13331550	1	151000000	SEMA6C	chr1:151118049-151119373	0.528455	0.267889	0.260566	5.92548e-12	2.18262e-10		CCL3L1|6349	2.32134	1.62275	4.47086e-33	1.19316e-31		CLEC5A|23601	2.3295	1.90459	1.84e-26	9.62e-24		CAPN6|827	-1.11795	3.54062	0.00036311	0.00085773
cg27594756	1	91870389	HFM1	chr1:91869876-91870390	0.633391	0.274579	0.358811	1.6615e-11	4.16761e-10		cg10331073	10	26856128	APBB1IP	chr10:26855906-26856198	0.623603	0.266513	0.35709	4.57002e-09	5.16285e-07		cg10963543	1	151000000	PSMD4		0.430454	0.155681	0.274773	1.29866e-08	2.11639e-07		CCL3L3|414062	2.30037	-1.582	2.75215e-14	1.86124e-13		CLEC6A|93978	2.11688	-2.40939	5.69e-12	1.15e-10		CAPS|828	-2.16932	4.21246	1.05e-21	2.41e-20
cg07197585	1	92494997	EPHX4	chr1:92495367-92495964	0.790807	0.480629	0.310178	4.88163e-10	8.70049e-09		cg19797516	10	26856454	APBB1IP	chr10:26855906-26856198	0.705212	0.353293	0.351919	1.51597e-09	2.26326e-07		cg06100368	1	152000000	C1orf230	chr1:151693991-151694282	0.307608	0.056336	0.251272	3.16598e-08	4.75742e-07		CCL4|6351	2.21531	2.79873	1.95874e-71	6.72527e-69		CLEC7A|64581	1.56714	2.44407	1.93e-18	1.34e-16		CAPSL|133690	-2.53918	-2.76885	3.79e-06	1.21e-05
cg09515098	1	92942075	GFI1	chr1:92945907-92952609	0.44332	0.124213	0.319108	7.42482e-12	2.02447e-10		cg18014277	10	26856664	APBB1IP	chr10:26855906-26856198	0.777051	0.493014	0.284037	8.00366e-10	1.42692e-07		cg14661959	1	152000000	TCHH	chr1:152079997-152081705	0.549438	0.277337	0.272101	8.05916e-10	1.72977e-08		CCL4L2|388372	2.07367	2.85323	4.95458e-37	1.70114e-35		CLIP4|79745	1.46181	1.45253	7.68e-17	3.91e-15		CARD11|84433	-1.11816	4.27083	2.49e-07	9.39e-07
cg12876356	1	92946825	GFI1	chr1:92945907-92952609	0.658106	0.38865	0.269456	2.8469e-19	5.95102e-17		cg01424281	10	28031091	MKX	chr10:28030182-28035211	0.395225	0.0527921	0.342433	9.57975e-10	1.61652e-07		cg05523911	1	152000000	TCHH	chr1:152079997-152081705	0.610789	0.2659	0.344888	1.32288e-09	2.69948e-08		CCL5|6352	2.29556	4.42851	4.70019e-66	1.13402e-63		CLLU1|574028	-1.34426	-2.01652	0.00024209	0.00094225		CARD17|440068	1.92303	-3.20669	4.97e-11	3.07e-10
cg18316974	1	92947035	GFI1	chr1:92945907-92952609	0.859431	0.550001	0.309431	1.90209e-21	7.28556e-19		cg23817042	10	28031269	MKX	chr10:28030182-28035211	0.309091	0.0489795	0.260112	6.51088e-09	6.6915e-07		cg03438305	1	152000000	TCHH	chr1:152083021-152084240	0.441741	0.173899	0.267842	2.7923e-11	8.56335e-10		CCL7|6354	2.29284	-1.70496	1.893e-25	3.00423e-24		CLNK|116449	1.1893	-3.06675	5.14e-05	0.00023662		CARTPT|9607	-1.75202	-0.419011	7e-06	2.16e-05
cg09935388	1	92947588	GFI1	chr1:92945907-92952609	0.801128	0.485346	0.315782	6.00641e-20	1.50946e-17		cg20395153	10	28031385	MKX	chr10:28030182-28035211	0.463761	0.084811	0.37895	3.6563e-10	8.04431e-08		cg05464302	1	152000000	TCHH	chr1:152083021-152084240	0.373997	0.106094	0.267904	4.93046e-11	1.4103e-09		CCL8|6355	2.44421	0.6101	3.64184e-39	1.42591e-37		CLPS|1208	1.58151	-3.05387	0.00463129	0.0128095		CASP1|834	1.35574	5.59298	2.26e-20	4.4e-19
cg14179389	1	92947961	GFI1	chr1:92945907-92952609	0.591028	0.161182	0.429845	1.27606e-17	1.65008e-15		cg25523538	10	28031957	MKX	chr10:28030182-28035211	0.51864	0.218443	0.300197	2.88421e-07	1.24845e-05		cg10234068	1	152000000	TCHH	chr1:152083021-152084240	0.531374	0.110555	0.420818	5.98941e-11	1.67642e-09		CCNB3|85417	1.79892	-1.22168	3.39069e-33	9.13082e-32		CMA1|1215	1.38869	-2.90738	0.00209636	0.00634728		CASP12|120329	-1.43942	-2.91072	6.49e-08	2.64e-07
cg09185386	1	94018978	FNBP1L		0.625601	0.321522	0.30408	5.45666e-24	4.07203e-21		cg16397794	10	28032282	MKX	chr10:28030182-28035211	0.501611	0.217538	0.284073	5.29859e-06	0.000121821		cg24645670	1	152000000	TCHH	chr1:152083021-152084240	0.492669	0.0994487	0.39322	2.33367e-10	5.67032e-09		CCR1|1230	1.301	2.77634	4.72e-32	1.16656e-30		CMKLR1|1240	1.34598	3.19634	4.97e-14	1.5e-12		CASQ1|844	-1.95958	-1.89216	2.81e-14	2.61e-13
cg01206378	1	95698827	RWDD3	chr1:95699725-95700142	0.685136	0.262461	0.422675	1.02805e-16	1.04616e-14		cg11952493	10	28570835	MPP7		0.79364	0.535474	0.258166	1.32536e-13	4.46778e-10		cg24880024	1	152000000	TCHH	chr1:152083021-152084240	0.507323	0.0496125	0.45771	2.52413e-12	1.03606e-10		CCR2|729230	1.1616	0.675278	1.72249e-12	9.82537e-12		CMPK2|129607	1.33642	3.978	6.08e-14	1.8e-12		CASQ2|845	-3.31208	1.95733	1.05e-20	2.13e-19
cg20701556	1	95698924	RWDD3	chr1:95699725-95700142	0.506486	0.236729	0.269757	4.63445e-12	1.32877e-10		cg00049475	10	29923736	SVIL		0.705829	0.360516	0.345313	1.32604e-11	8.52844e-09		cg20795569	1	152000000	TCHH	chr1:152084994-152085215	0.391143	0.0418155	0.349328	3.16192e-12	1.26182e-10		CCR5|1234	1.54289	2.32662	9.11255e-35	2.73316e-33		CMTM2|146225	1.05521	-0.996969	6.25e-06	3.55e-05		CATSPER1|117144	-1.09284	-0.995208	8.77e-07	3.07e-06
cg14072140	1	98031839	DPYD		0.659663	0.375103	0.28456	1.32375e-09	2.13404e-08		cg04678141	10	29923920	SVIL		0.622422	0.260435	0.361987	1.14618e-12	1.7221e-09		cg00584000	1	152000000	TCHH	chr1:152084994-152085215	0.473713	0.0873372	0.386375	9.31083e-12	3.24074e-10		CCRL1|51554	2.26116	0.817311	1.50857e-36	5.05328e-35		CNGA1|1259	-1.9566	1.35114	5.36e-19	4.25e-17		CATSPERB|79820	1.77901	0.0859825	1.44e-18	2.25e-17
cg06990379	1	98386209	DPYD	chr1:98386189-98386724	0.309049	0.0379082	0.271141	8.70357e-10	1.46228e-08		cg03241461	10	29924258	SVIL		0.753666	0.476132	0.277533	5.59226e-12	4.82705e-09		cg09873164	1	152000000	CRCT1	chr1:152487978-152488270	0.630492	0.268534	0.361958	6.2864e-12	2.29652e-10		CD109|135228	3.65314	4.11001	8.92257e-133	5.31012e-129		CNGB3|54714	-1.3227	-2.97398	0.0116594	0.0284079		CBLN1|869	-1.96741	1.20323	4.39e-08	1.84e-07
cg11956761	1	99730221	LPPR4	chr1:99729982-99730335	0.387786	0.133447	0.254339	2.21928e-11	5.41933e-10		cg06637963	10	31608188	ZEB1;LOC220930	chr10:31607227-31610094	0.536499	0.202016	0.334484	1.10845e-06	3.55087e-05		cg03352287	1	152000000	CRCT1	chr1:152487978-152488270	0.535015	0.17169	0.363325	1.97258e-11	6.29295e-10		CD14|929	1.42625	5.56139	5.78402e-43	3.01072e-41		CNN1|1264	1.21542	4.09787	1.9e-09	2.26e-08		CBLN2|147381	-1.27481	-1.74706	2.53e-08	1.1e-07
cg05160678	1	101701734	S1PR1	chr1:101701785-101702068	0.447508	0.0974389	0.350069	7.87628e-13	2.74697e-11		cg09010998	10	31608207	ZEB1;LOC220930	chr10:31607227-31610094	0.495074	0.192639	0.302435	3.94933e-06	9.67541e-05		cg15131647	1	154000000	NPR1	chr1:153650830-153652375	0.468181	0.193857	0.274325	8.80686e-12	3.08989e-10		CD163|9332	2.06878	4.22566	7.17538e-48	5.1657e-46		CNTD2|79935	1.09805	2.98145	8.77e-06	4.84e-05		CBLN4|140689	-2.31948	-2.06699	4.89e-11	3.03e-10
cg20740769	1	101701819	S1PR1	chr1:101701785-101702068	0.40161	0.0672676	0.334343	8.5683e-12	2.30602e-10		cg01387945	10	31608209	ZEB1;LOC220930	chr10:31607227-31610094	0.465948	0.171647	0.294301	3.22814e-06	8.25979e-05		cg19751545	1	154000000	NPR1	chr1:153650830-153652375	0.409359	0.156234	0.253124	1.43142e-09	2.89559e-08		CD164L2|388611	1.71233	-1.22297	3.104e-18	2.91678e-17		CNTN3|5067	-2.54668	0.208166	1.25e-12	2.89e-11		CBR3|874	1.02	3.15409	7.36e-13	5.71e-12
cg02628801	1	101701963	S1PR1	chr1:101701785-101702068	0.431028	0.0243754	0.406652	9.24053e-15	5.47215e-13		cg23232615	10	31608212	ZEB1;LOC220930	chr10:31607227-31610094	0.442866	0.150979	0.291887	2.44893e-06	6.64826e-05		cg07299819	1	154000000	NPR1	chr1:153650830-153652375	0.484963	0.224463	0.2605	1.52259e-10	3.86281e-09		CD2|914	1.35668	3.15217	3.08868e-25	4.83731e-24		CNTNAP1|8506	1.00221	2.46395	7.68e-12	1.5e-10		CC2D2A|57545	-1.54191	2.94079	1.19e-27	6.09e-26
cg05338680	1	101701965	S1PR1	chr1:101701785-101702068	0.528508	0.0966221	0.431886	7.26052e-16	5.86109e-14		cg01267522	10	31608548	ZEB1;LOC220930	chr10:31607227-31610094	0.488752	0.206349	0.282403	4.71785e-06	0.000111287		cg04484579	1	154000000	NPR1	chr1:153650830-153652375	0.476783	0.156807	0.319976	2.78174e-13	1.53841e-11		CD200|4345	1.17835	2.94202	4.69977e-18	4.36121e-17		COL10A1|1300	2.04432	3.91234	1.82e-11	3.27e-10		CCBE1|147372	-1.19534	0.260223	5.45e-07	1.96e-06
cg25012864	1	101702062	S1PR1	chr1:101701785-101702068	0.554952	0.0584716	0.49648	2.94514e-15	1.98972e-13		cg23712359	10	31609905	ZEB1	chr10:31607227-31610094	0.578442	0.32234	0.256102	7.22289e-06	0.000155677		cg23098020	1	154000000	NPR1	chr1:153650830-153652375	0.493385	0.172998	0.320387	1.83637e-16	3.02394e-14		CD209|30835	1.27688	2.5922	8.95286e-17	7.55051e-16		COL11A1|1301	1.94335	4.6863	4.3e-15	1.61e-13		CCDC109B|55013	1.10581	4.16972	1.4e-28	8.24e-27
cg04156369	1	101702519	S1PR1	chr1:101702445-101702745	0.540485	0.26398	0.276505	1.7471e-15	1.26452e-13		cg14582298	10	31610093	ZEB1	chr10:31607227-31610094	0.593624	0.343152	0.250471	2.05495e-06	5.78654e-05		cg05511392	1	154000000	NPR1	chr1:153650830-153652375	0.582681	0.193777	0.388904	3.84074e-17	8.31902e-15		CD22|933	1.03403	0.657442	2.49901e-08	9.41491e-08		COL13A1|1305	1.43436	0.920505	8.08e-13	1.94e-11		CCDC141|285025	1.67705	-0.71837	3.57e-10	2e-09
cg27229407	1	103572615	COL11A1		0.570056	0.263332	0.306723	3.41894e-11	7.98457e-10		cg08979862	10	44880128	CXCL12	chr10:44879714-44882391	0.553319	0.281637	0.271682	1.13761e-08	1.03005e-06		cg26246928	1	154000000	NPR1	chr1:153650830-153652375	0.451137	0.0894093	0.361728	1.90881e-17	4.70824e-15		CD226|10666	1.53954	-0.625172	9.80896e-25	1.47913e-23		COL15A1|1306	1.13181	5.92222	2.75e-14	8.85e-13		CCDC152|100129792	-1.07014	1.6426	1.71e-08	7.62e-08
cg02361557	1	107682963	NTNG1	chr1:107682889-107684463	0.601836	0.293792	0.308044	4.16427e-16	3.57936e-14		cg25721625	10	44880236	CXCL12	chr10:44879714-44882391	0.55283	0.271038	0.281792	2.18505e-09	2.99212e-07		cg14178748	1	154000000	NPR1	chr1:153650830-153652375	0.517787	0.100526	0.417261	1.36159e-15	1.68918e-13		CD244|51744	1.58926	0.165854	4.44313e-23	5.88921e-22		COL17A1|1308	-1.5324	7.20091	1.26e-10	1.88e-09		CCDC155|147872	1.40439	-3.1467	0.00365508	0.00722163
cg18200760	1	107683677	NTNG1	chr1:107682889-107684463	0.555093	0.233582	0.32151	5.05953e-14	2.43013e-12		cg06048524	10	44880542	CXCL12	chr10:44879714-44882391	0.588525	0.245009	0.343517	3.84758e-09	4.54269e-07		cg06824583	1	154000000	AQP10;ATP8B2	chr1:154298205-154298544	0.382201	0.128025	0.254177	2.46342e-11	7.66131e-10		CD247|919	1.33772	1.95308	5.64955e-27	1.00365e-25		COL1A1|1277	1.52652	10.8754	1.04e-16	5.24e-15		CCDC160|347475	3.33374	-2.20849	1.89e-15	2.06e-14
cg07155336	1	107683775	NTNG1	chr1:107682889-107684463	0.70419	0.353744	0.350446	2.18997e-14	1.16712e-12		cg17267805	10	44880545	CXCL12	chr10:44879714-44882391	0.622775	0.276169	0.346606	1.19903e-08	1.06981e-06		cg07911225	1	154000000	SHE;TDRD10	chr1:154474107-154475699	0.544003	0.252371	0.291631	5.60826e-17	1.14299e-14		CD274|29126	2.53783	0.968208	8.96497e-75	3.81097e-72		COL1A2|1278	1.31657	10.1198	1.73e-15	7.08e-14		CCDC60|160777	-1.21005	-0.454247	0.002402	0.00492446
cg01559617	1	107684059	NTNG1	chr1:107682889-107684463	0.525469	0.267789	0.25768	3.01902e-14	1.5436e-12		cg26267854	10	44880562	CXCL12	chr10:44879714-44882391	0.512026	0.199866	0.31216	5.87228e-09	6.19942e-07		cg16683920	1	154000000	SHE;TDRD10	chr1:154474107-154475699	0.595478	0.269237	0.326241	9.71094e-13	4.53883e-11		CD300A|11314	1.54104	2.93528	1.27815e-40	5.47245e-39		COL22A1|169044	1.22656	-0.244958	4e-07	2.95e-06		CCDC67|159989	-1.29944	-2.92931	1.81e-05	5.23e-05
cg09508770	1	107684255	NTNG1	chr1:107682889-107684463	0.582903	0.320171	0.262733	6.47583e-11	1.417e-09		cg00353773	10	44880708	CXCL12	chr10:44879714-44882391	0.611789	0.281898	0.329891	7.38109e-09	7.39596e-07		cg16899920	1	154000000	SHE;TDRD10	chr1:154474107-154475699	0.532425	0.245911	0.286515	9.22567e-21	9.84639e-18		CD300C|10871	1.18472	0.299244	2.63343e-21	3.06701e-20		COL24A1|255631	1.17159	-0.157822	4.53e-08	4.06e-07		CCDC68|80323	1.66053	3.82426	4.41e-36	9.11e-34
cg06368118	1	107684339	NTNG1	chr1:107682889-107684463	0.664274	0.317062	0.347211	3.66054e-18	5.61479e-16		cg26718433	10	44880730	CXCL12	chr10:44879714-44882391	0.58695	0.309824	0.277126	2.40621e-08	1.82177e-06		cg19970699	1	154000000	SHE;TDRD10	chr1:154474107-154475699	0.5992	0.320779	0.278421	5.66472e-17	1.1529e-14		CD300E|342510	1.95171	-2.25998	2.33271e-18	2.21298e-17		COL2A1|1280	-3.58371	-0.858952	1.72e-16	8.24e-15		CCDC8|83987	-1.52812	2.5857	2.96e-28	1.67e-26
cg27587125	1	109204207	C1orf59	chr1:109203593-109204378	0.368162	0.116888	0.251274	2.11325e-07	2.00982e-06		cg10927719	10	44880819	CXCL12	chr10:44879714-44882391	0.502215	0.193597	0.308618	2.20522e-09	3.00978e-07		cg02856953	1	154000000	SHE;TDRD10	chr1:154474107-154475699	0.635327	0.290889	0.344438	6.83384e-19	3.08814e-16		CD300LF|146722	1.63209	1.38095	7.99909e-35	2.41243e-33		COL3A1|1281	1.33829	10.2345	2.63e-16	1.22e-14		CCDC80|151887	-1.71065	6.34616	1.32e-22	3.44e-21
cg12465704	1	110008870	SYPL2	chr1:110008962-110010124	0.454408	0.0781582	0.37625	1.65923e-12	5.33975e-11		cg04110601	10	48438724	GDF10	chr10:48438411-48439320	0.682014	0.40848	0.273534	1.96326e-05	0.000341303		cg23597057	1	155000000	KCNN3	chr1:154732822-154733436	0.437085	0.160279	0.276806	4.44574e-08	6.47865e-07		CD33|945	1.20755	0.412228	3.20928e-21	3.70864e-20		COL4A5|1287	-1.21683	1.79153	1.42e-05	7.47e-05		CCDC83|220047	1.438	-3.0013	0.0013374	0.00288288
cg12515325	1	110008909	SYPL2	chr1:110008962-110010124	0.384575	0.094217	0.290358	1.89198e-12	5.99539e-11		cg00142482	10	50396833	C10orf128		0.794381	0.529419	0.264962	7.90215e-08	4.55788e-06		cg21386140	1	155000000	KCNN3	chr1:154732822-154733436	0.430162	0.162813	0.267349	4.17952e-09	7.62901e-08		CD37|951	1.434	2.93263	1.37972e-30	3.12211e-29		COL4A6|1288	-1.62164	-0.235709	6.82e-08	5.94e-07		CCDC85A|114800	-1.94158	0.0844576	9.38e-21	1.92e-19
cg20591472	1	110008990	SYPL2	chr1:110008962-110010124	0.703648	0.223101	0.480548	2.42977e-27	3.58087e-24		cg22635008	10	50970249	OGDHL	chr10:50969658-50970605	0.584854	0.175311	0.409543	6.53998e-12	5.39876e-09		cg16489975	1	155000000	KCNN3	chr1:154732822-154733436	0.793104	0.53335	0.259754	2.13403e-13	1.2231e-11		CD38|952	1.08862	1.39456	4.55118e-08	1.66373e-07		COL5A1|1289	1.06177	7.54963	3.83e-12	7.98e-11		CCDC89|220388	-1.51072	-0.691364	6.11e-28	3.32e-26
cg07589691	1	110009282	SYPL2	chr1:110008962-110010124	0.498994	0.0964375	0.402556	3.57627e-14	1.79104e-12		cg11576834	10	50970258	OGDHL	chr10:50969658-50970605	0.627302	0.222677	0.404625	2.31174e-12	2.8249e-09		cg16585911	1	156000000	SYT11	chr1:155830195-155830489	0.478434	0.174454	0.30398	5.76681e-12	2.12818e-10		CD3D|915	1.2202	2.29258	3.16931e-19	3.19245e-18		COL5A2|1290	1.21128	7.00046	5.39e-16	2.34e-14		CCIN|881	-1.43888	-1.73233	8.17e-18	1.17e-16
cg13673164	1	110009509	SYPL2	chr1:110008962-110010124	0.552793	0.0804756	0.472317	6.01791e-17	6.5198e-15		cg06222851	10	50970358	OGDHL	chr10:50969658-50970605	0.45429	0.133576	0.320714	2.19311e-11	1.20222e-08		cg24712249	1	156000000	SYT11	chr1:155830195-155830489	0.484052	0.197075	0.286977	3.0187e-10	7.1471e-09		CD3E|916	1.31618	3.27432	9.38176e-25	1.41951e-23		COL5A3|50509	1.32405	4.22044	5.49e-16	2.37e-14		CCK|885	3.4929	0.350477	1.08e-16	1.35e-15
cg07571041	1	110009770	SYPL2	chr1:110008962-110010124	0.533563	0.15144	0.382123	2.99251e-16	2.66492e-14		cg11153529	10	50970539	OGDHL	chr10:50969658-50970605	0.519769	0.23813	0.28164	1.46352e-08	1.24051e-06		cg11961255	1	156000000	SYT11	chr1:155830195-155830489	0.349916	0.0762609	0.273655	1.2424e-11	4.18188e-10		CD3G|917	1.29982	0.352281	7.78303e-17	6.59832e-16		COL6A1|1291	1.50171	8.00901	3.31e-20	3.54e-18		CCKBR|887	-3.2348	-2.56036	2.55e-11	1.65e-10
cg23472215	1	110282815	GSTM3	chr1:110282351-110283306	0.455762	0.0861725	0.369589	3.00301e-14	1.53675e-12		cg00683156	10	50970546	OGDHL	chr10:50969658-50970605	0.401606	0.123736	0.277871	5.23538e-09	5.71176e-07		cg13795986	1	156000000	RIT1		0.621318	0.224225	0.397093	4.44782e-17	9.47304e-15		CD4|920	1.03097	4.87144	3.38315e-20	3.62562e-19		COL6A2|1292	1.29342	8.20701	1.81e-18	1.26e-16		CCL11|6356	-1.22238	2.61407	1.76e-09	8.95e-09
cg25027501	1	110283223	GSTM3	chr1:110282351-110283306	0.473526	0.129122	0.344404	8.53856e-14	3.85255e-12		cg09647147	10	50970575	OGDHL	chr10:50969658-50970605	0.47899	0.16568	0.31331	2.3855e-10	5.91092e-08		cg11400774	1	156000000	MEX3A	chr1:156051239-156051461	0.487194	0.149199	0.337995	5.08769e-11	1.44952e-09		CD48|962	1.07281	2.9385	6.07261e-14	3.97144e-13		COL6A3|1293	1.19324	8.36079	2.71e-13	7.05e-12		CCL14|6358	-2.09766	2.31839	7.63e-20	1.39e-18
cg18935813	1	111149153	KCNA2	chr1:111148983-111150186	0.491768	0.136522	0.355246	2.3927e-14	1.26169e-12		cg22611504	10	52750754	PRKG1	chr10:52750956-52751765	0.362831	0.087249	0.275582	2.76625e-09	3.54268e-07		cg02951552	1	156000000	MEX3A	chr1:156051239-156051461	0.409518	0.133639	0.275879	2.39056e-11	7.46627e-10		CD52|1043	1.24827	3.13863	5.84217e-25	8.98843e-24		COL6A6|131873	1.05557	-1.895	0.00301877	0.00879847		CCL16|6360	-3.4266	-1.3042	3.92e-12	2.79e-11
cg14208112	1	111149307	KCNA2	chr1:111148983-111150186	0.535301	0.166483	0.368819	1.31301e-12	4.33252e-11		cg14731413	10	52833444	PRKG1	chr10:52833539-52834752	0.418489	0.112158	0.306331	5.58586e-12	4.82705e-09		cg26022183	1	156000000	PAQR6	chr1:156215368-156215899	0.342576	0.0517762	0.290799	1.13884e-07	1.51967e-06		CD53|963	1.56246	4.46723	6.87141e-40	2.78823e-38		COL7A1|1294	1.23809	4.84152	6.1e-09	6.55e-08		CCL17|6361	-1.10067	-0.606009	7.24e-06	2.23e-05
cg25281171	1	111149507	KCNA2	chr1:111148983-111150186	0.475714	0.154021	0.321693	4.91388e-11	1.10677e-09		cg23828595	10	52833610	PRKG1	chr10:52833539-52834752	0.482658	0.110341	0.372317	1.68252e-15	2.56908e-11		cg10544251	1	156000000	PAQR6	chr1:156215368-156215899	0.360989	0.110351	0.250637	2.86706e-08	4.34286e-07		CD55|1604	1.8055	7.36839	1.62403e-59	2.68477e-57		COL8A1|1295	1.51338	3.18803	6.28e-13	1.52e-11		CCL19|6363	-1.85994	2.76215	2.72e-10	1.55e-09
cg23658744	1	111506587	C1orf103	chr1:111505881-111507007	0.378054	0.0967116	0.281343	2.0326e-10	3.96247e-09		cg04884011	10	52833909	PRKG1	chr10:52833539-52834752	0.566336	0.093486	0.47285	4.90408e-15	5.53173e-11		cg09938227	1	156000000	C1orf61	chr1:156390403-156391581	0.58752	0.302532	0.284988	3.0343e-10	7.17882e-09		CD6|923	1.01207	2.86347	5.34665e-19	5.28859e-18		COL9A1|1297	-2.13649	1.20304	1.45e-10	2.16e-09		CCL21|6366	-1.17606	4.91002	4.52e-10	2.49e-09
cg04879281	1	111506980	C1orf103	chr1:111505881-111507007	0.507981	0.109926	0.398055	8.72989e-13	3.00713e-11		cg27380599	10	52834067	PRKG1	chr10:52833539-52834752	0.485258	0.106985	0.378273	1.56623e-13	5.04767e-10		cg13149127	1	156000000	MIR9-1;C1orf61	chr1:156390403-156391581	0.439474	0.18739	0.252084	6.6204e-10	1.44842e-08		CD69|969	1.39521	1.53804	1.03712e-20	1.15153e-19		COLEC10|10584	-1.01521	-2.17679	0.000694	0.00238936		CCL24|6369	-1.29405	3.54922	1.42e-08	6.42e-08
cg15566506	1	111507004	C1orf103	chr1:111505881-111507007	0.501534	0.166218	0.335316	4.73601e-12	1.35442e-10		cg02731293	10	52834076	PRKG1	chr10:52833539-52834752	0.480026	0.112157	0.36787	2.63441e-13	6.42687e-10		cg06609427	1	156000000	MIR9-1;C1orf61	chr1:156390403-156391581	0.417986	0.152485	0.265502	1.40446e-08	2.27389e-07		CD7|924	1.93422	2.86466	4.39644e-42	2.11005e-40		COLEC12|81035	1.61696	2.14804	9.38e-15	3.3e-13		CCL26|10344	1.04886	0.655619	9.87e-06	2.98e-05
cg02605776	1	111507160	C1orf103	chr1:111505881-111507007	0.58403	0.318474	0.265556	4.42288e-12	1.27569e-10		cg07113562	10	52834093	PRKG1	chr10:52833539-52834752	0.406686	0.110554	0.296132	2.63065e-10	6.30832e-08		cg09793584	1	156000000	MIR9-1;C1orf61	chr1:156390403-156391581	0.574147	0.214981	0.359165	1.42935e-11	4.7313e-10		CD70|970	3.48593	1.53631	8.25358e-63	1.60173e-60		COMP|1311	2.60942	3.23775	4.87e-12	9.89e-11		CCL5|6352	1.19533	5.0577	2.24e-14	2.11e-13
cg02030493	1	111888719	C1orf88	chr1:111889138-111889539	0.38456	0.0716637	0.312896	5.98687e-11	1.3198e-09		cg04327529	10	52834121	PRKG1	chr10:52833539-52834752	0.420981	0.0844774	0.336504	9.6226e-12	6.95496e-09		cg08123045	1	156000000	MEF2D	chr1:156469617-156471060	0.559609	0.284938	0.274671	3.94243e-11	1.1597e-09		CD72|971	1.23887	1.1476	1.94546e-29	4.05773e-28		CP|1356	3.83698	3.14277	3.8e-22	6.15e-20		CCNA1|8900	-1.74682	-2.43763	2.32e-08	1.02e-07
cg21926138	1	111889420	C1orf88	chr1:111889138-111889539	0.462809	0.110675	0.352134	1.4969e-14	8.35548e-13		cg20416031	10	52834189	PRKG1	chr10:52833539-52834752	0.402912	0.105137	0.297774	2.01782e-12	2.59552e-09		cg10640435	1	157000000	HAPLN2	chr1:156593657-156595283	0.456459	0.147299	0.30916	4.91165e-12	1.85174e-10		CD74|972	1.96578	10.2563	2.15319e-62	3.96321e-60		CPA1|1357	3.87341	-2.98241	4.21e-08	3.79e-07		CCNB3|85417	1.12636	-0.819104	1.36e-09	7.03e-09
cg10394832	1	111889533	C1orf88	chr1:111889138-111889539	0.545706	0.174299	0.371407	3.29115e-17	3.83175e-15		cg09019938	10	52834498	PRKG1	chr10:52833539-52834752	0.526506	0.131203	0.395303	9.35367e-14	3.79775e-10		cg20285128	1	157000000	NES	chr1:156646292-156647260	0.348368	0.0900912	0.258277	3.18151e-07	3.83314e-06		CD80|941	1.33742	0.0258757	5.63802e-23	7.39069e-22		CPA2|1358	1.49442	-0.0532439	0.00252143	0.00747764		CCRL1|51554	1.33631	1.3524	3.86e-13	3.11e-12
cg23923856	1	113051685	WNT2B	chr1:113050813-113052301	0.533575	0.107638	0.425937	1.35075e-14	7.61669e-13		cg12022294	10	52834676	PRKG1	chr10:52833539-52834752	0.562697	0.130897	0.4318	3.99829e-16	1.30289e-11		cg18534318	1	157000000	INSRR;NTRK1	chr1:156828804-156831102	0.426535	0.127261	0.299275	6.53407e-13	3.21044e-11		CD84|8832	1.79851	1.31868	1.93193e-34	5.60856e-33		CPA6|57094	-2.23819	0.837946	2.42e-08	2.3e-07		CD109|135228	1.31167	5.05927	5.07e-12	3.56e-11
cg14186963	1	113051777	WNT2B	chr1:113050813-113052301	0.454891	0.0683054	0.386586	1.66731e-12	5.36281e-11		cg07934217	10	52834850	PRKG1	chr10:52833539-52834752	0.391519	0.141209	0.250311	3.06495e-12	3.32917e-09		cg12995941	1	157000000	INSRR;NTRK1	chr1:156828804-156831102	0.522019	0.18178	0.340239	1.21958e-13	7.59712e-12		CD86|942	1.65511	2.5322	2.40482e-45	1.52254e-43		CPB1|1360	-3.76858	-2.08414	1.68e-12	3.76e-11		CD164L2|388611	1.63297	-1.04951	1.4e-13	1.19e-12
cg08739433	1	113051925	WNT2B	chr1:113050813-113052301	0.494333	0.211581	0.282752	1.77535e-13	7.38222e-12		cg26332926	10	52835078	PRKG1	chr10:52833539-52834752	0.536454	0.241592	0.294862	3.70447e-10	8.09561e-08		cg03438943	1	157000000	INSRR;NTRK1	chr1:156828804-156831102	0.672391	0.340304	0.332087	4.56096e-17	9.63702e-15		CD8A|925	2.1168	2.92432	3.46392e-45	2.16241e-43		CPE|1363	-1.72152	4.63176	1.37e-11	2.53e-10		CD1C|911	-1.39658	0.674805	2.09e-12	1.53e-11
cg11806528	1	113051977	WNT2B	chr1:113050813-113052301	0.483493	0.168981	0.314511	1.34522e-14	7.59134e-13		cg12621514	10	54073047	DKK1	chr10:54073989-54074827	0.632907	0.265384	0.367523	2.72331e-11	1.37704e-08		cg03055346	1	157000000	INSRR;NTRK1	chr1:156828804-156831102	0.316074	0.042474	0.2736	3.80469e-09	7.00587e-08		CD96|10225	1.55095	1.88466	2.60836e-30	5.77788e-29		CPEB1|64506	1.01566	-2.39964	0.0010413	0.00343603		CD1E|913	-1.37786	-0.104934	9.99e-11	5.98e-10
cg07005055	1	113052167	WNT2B	chr1:113050813-113052301	0.362012	0.105214	0.256798	1.25858e-09	2.03896e-08		cg25158147	10	54073150	DKK1	chr10:54073989-54074827	0.522693	0.101429	0.421264	7.53286e-13	1.315e-09		cg06360543	1	157000000	C1orf92	chr1:156890243-156890806	0.582419	0.318543	0.263876	2.75152e-10	6.57933e-09		CDC42EP1|11135	1.19547	7.26461	1.71325e-44	9.96362e-43		CPLX1|10815	1.16032	3.12726	1.73e-10	2.52e-09		CD22|933	-1.01071	2.04919	2.94e-05	8.22e-05
cg10806711	1	113265679	FAM19A3	chr1:113265573-113265787	0.545014	0.264285	0.280729	1.33181e-16	1.31334e-14		cg02302582	10	54073281	DKK1	chr10:54073989-54074827	0.472984	0.114313	0.358671	2.86462e-12	3.17059e-09		cg26614154	1	157000000	C1orf92	chr1:156893519-156894232	0.617472	0.225455	0.392017	2.19432e-25	1.78376e-21		CDH15|1013	1.49496	-1.5202	1.07947e-11	5.68353e-11		CPLX2|10814	1.06703	1.664	0.00773546	0.0200508		FASLG|356	1.69481	0.303339	5.52e-23	1.51e-21
cg22020227	1	114521775	OLFML3		0.707043	0.353121	0.353922	1.75971e-14	9.62839e-13		cg02493604	10	54073445	DKK1	chr10:54073989-54074827	0.431964	0.149943	0.282022	9.21115e-11	3.10507e-08		cg24638326	1	157000000	C1orf92	chr1:156893519-156894232	0.563119	0.136779	0.42634	7.42686e-22	1.34452e-18		CDH16|1014	1.48313	1.57415	1.68799e-05	4.46679e-05		CPLX3|594855	1.00665	-3.24553	0.00796972	0.020595		CD248|57124	-1.12293	6.20956	5.57e-21	1.18e-19
cg23141333	1	115212619	DENND2C	chr1:115212239-115212985	0.293811	0.0292079	0.264603	5.57671e-10	9.80525e-09		cg11931116	10	54074040	DKK1	chr10:54073989-54074827	0.532784	0.195321	0.337463	4.10336e-12	4.01822e-09		cg06374307	1	157000000	C1orf92	chr1:156893519-156894232	0.47158	0.20054	0.27104	1.01767e-19	6.35015e-17		CDH22|64405	-3.41977	-0.654665	6.32061e-09	2.5325e-08		CPN1|1369	-1.53887	-2.44834	0.00106413	0.00350096		CD274|29126	1.51856	1.53514	3.4e-20	6.48e-19
cg13501090	1	115212659	DENND2C	chr1:115212239-115212985	0.409646	0.135632	0.274015	1.15887e-10	2.38974e-09		cg09445939	10	54074079	DKK1	chr10:54073989-54074827	0.45738	0.183759	0.27362	9.54733e-12	6.94891e-09		cg09858604	1	157000000	C1orf92	chr1:156893519-156894232	0.527717	0.267597	0.26012	1.82685e-14	1.51605e-12		CDH26|60437	-2.72056	-0.355407	3.99016e-23	5.31644e-22		CPO|130749	1.15776	-3.27009	0.00173179	0.00537995		CD300LG|146894	-3.58365	-0.939333	1.28e-16	1.58e-15
cg16124571	1	115212670	DENND2C	chr1:115212239-115212985	0.329852	0.0266377	0.303214	5.07817e-09	7.12128e-08		cg01160882	10	54075082	DKK1	chr10:54073989-54074827	0.584066	0.242902	0.341164	3.26956e-10	7.39804e-08		cg20298273	1	157000000	C1orf92	chr1:156897199-156897796	0.645577	0.36774	0.277837	2.9031e-14	2.25062e-12		CDH9|1007	-4.65441	-2.7167	6.12433e-13	3.64479e-12		CPS1|1373	-2.33095	4.9466	2.57e-08	2.44e-07		CD36|948	-1.62152	3.96899	4.41e-13	3.52e-12
cg14521523	1	115212675	DENND2C	chr1:115212239-115212985	0.295313	0.0228752	0.272437	1.31566e-08	1.67152e-07		cg07567376	10	60271505	BICC1	chr10:60272467-60273456	0.653331	0.327217	0.326115	1.25212e-13	4.37162e-10		cg22402053	1	157000000	C1orf92	chr1:156897199-156897796	0.329904	0.0771095	0.252795	2.41494e-09	4.64941e-08		CDHR1|92211	-2.15203	6.77756	2.01828e-17	1.78397e-16		CPT1C|126129	1.13383	0.529225	1.16e-10	1.75e-09		CD55|1604	1.14492	7.82234	8.18e-16	9.25e-15
cg22487624	1	115212681	DENND2C	chr1:115212239-115212985	0.277538	0.0175508	0.259987	1.85365e-08	2.27223e-07		cg09696939	10	60272079	BICC1	chr10:60272467-60273456	0.548223	0.20394	0.344283	8.8707e-08	4.98154e-06		cg22667491	1	158000000	KIRREL	chr1:157963540-157963947	0.417301	0.12599	0.291312	1.86386e-08	2.93522e-07		CDHR4|389118	1.32824	-3.20482	3.09473e-06	9.04014e-06		CPVL|54504	1.26533	4.23158	3.69e-10	5.02e-09		CD5L|922	-1.33962	-2.15732	0.0236693	0.039509
cg00209951	1	115212834	DENND2C	chr1:115212239-115212985	0.307919	0.0275998	0.28032	9.35707e-09	1.23197e-07		cg18903093	10	63422511	C10orf107	chr10:63422538-63423105	0.650308	0.281367	0.368941	7.5604e-12	5.94446e-09		cg01188685	1	158000000	KIRREL	chr1:157963540-157963947	0.341757	0.0749716	0.266785	5.73757e-09	1.01581e-07		CDKN2A|1029	1.01856	2.97613	3.58028e-07	1.17375e-06		CPXM2|119587	1.58735	2.47642	5.58e-15	2.05e-13		CD70|970	2.06967	2.19917	2.26e-17	3.07e-16
cg25035908	1	115212901	DENND2C	chr1:115212239-115212985	0.328727	0.02235	0.306377	4.14052e-09	5.92985e-08		cg04438074	10	63422539	C10orf107	chr10:63422538-63423105	0.707605	0.412738	0.294867	1.34795e-11	8.63149e-09		cg15651099	1	158000000	KIRREL	chr1:157963540-157963947	0.423781	0.150366	0.273415	5.00609e-08	7.21812e-07		CDKN2BAS|100048912	-1.17357	0.768486	0.000214903	0.000485559		CR1|1378	1.09473	1.44884	5.17e-05	0.00023743		FOSL1|8061	1.09227	4.64345	7.97e-11	4.83e-10
cg15934415	1	115212914	DENND2C	chr1:115212239-115212985	0.389191	0.0270274	0.362164	6.63415e-09	9.05369e-08		cg11914795	10	63422555	C10orf107	chr10:63422538-63423105	0.749057	0.399521	0.349536	1.94874e-11	1.10895e-08		cg12124922	1	158000000	CD1D	chr1:158150620-158151503	0.623582	0.19388	0.429702	3.37718e-14	2.5527e-12		CDR2L|30850	1.3802	4.3296	5.38267e-41	2.36124e-39		CR1L|1379	1.42683	-2.98764	1.04e-05	5.65e-05		CDC20B|166979	-1.51632	-2.45065	0.00016705	0.00041646
cg23620052	1	115212949	DENND2C	chr1:115212239-115212985	0.289571	0.0323972	0.257174	1.98593e-07	1.90192e-06		cg11416811	10	63422630	C10orf107	chr10:63422538-63423105	0.414481	0.104449	0.310032	4.55549e-10	9.36897e-08		cg13844591	1	158000000	CD1D	chr1:158150620-158151503	0.59864	0.284646	0.313994	1.82737e-12	7.80887e-11		CDX2|1045	-1.5017	8.13681	3.12472e-37	1.09604e-35		CRABP1|1381	1.91386	0.777795	0.00035397	0.00132043		CDC7|8317	1.11157	3.38865	6.43e-27	2.93e-25
cg21931680	1	115238457	AMPD1		0.786924	0.507549	0.279374	3.13423e-15	2.09958e-13		cg07643225	10	63422633	C10orf107	chr10:63422538-63423105	0.492028	0.138741	0.353287	3.97419e-10	8.53247e-08		cg04360049	1	158000000	CD1D	chr1:158150620-158151503	0.545494	0.204741	0.340753	7.88486e-13	3.7748e-11		CEACAM16|388551	-1.22698	-3.03321	3.95081e-05	9.93489e-05		CRB2|286204	-1.79823	2.26736	9.62e-17	4.86e-15		CDCA2|157313	1.44688	3.65982	4.02e-42	3.18e-39
cg15740508	1	115238559	AMPD1		0.857355	0.519164	0.338192	1.07111e-27	1.68887e-24		cg00755980	10	63422640	C10orf107	chr10:63422538-63423105	0.458994	0.125742	0.333252	1.68042e-10	4.73817e-08		cg25683325	1	158000000	CD1D	chr1:158150620-158151503	0.602349	0.259203	0.343146	2.41172e-15	2.75535e-13		CEACAM20|125931	1.87599	-3.13646	1.09965e-07	3.83759e-07		CREG2|200407	1.24021	-0.353835	0.00027718	0.00106091		CDH11|1009	-1.13282	6.40463	4.31e-19	7.24e-18
cg18264789	1	115258650	NRAS		0.824975	0.557657	0.267318	1.13572e-20	3.56234e-18		cg24239148	10	63422841	C10orf107	chr10:63422538-63423105	0.539093	0.167405	0.371687	1.07298e-09	1.74591e-07		cg05768141	1	160000000	KCNJ10	chr1:160040128-160040668	0.516552	0.14884	0.367712	1.08214e-12	4.96429e-11		CEACAM3|1084	-1.02649	1.73445	0.00102659	0.00208471		CRLF1|9244	2.41663	-0.769496	1.57e-13	4.27e-12		CDH16|1014	2.29539	1.49985	4.68e-10	2.58e-09
cg21863110	1	116380417	NHLH2	chr1:116380359-116382364	0.610152	0.320727	0.289424	1.14138e-14	6.55708e-13		cg01137532	10	64133888	ZNF365	chr10:64133789-64134420	0.512569	0.262031	0.250539	1.62819e-06	4.80827e-05		cg04975598	1	160000000	KCNJ10	chr1:160040128-160040668	0.347544	0.0422834	0.305261	3.76287e-10	8.72567e-09		CEACAM4|1089	1.335	-1.75007	9.4714e-13	5.52622e-12		CRP|1401	-3.93104	-2.56046	1.66e-09	1.99e-08		CDH19|28513	-1.83945	-0.781137	4.83e-09	2.33e-08
cg25979559	1	116380572	NHLH2	chr1:116380359-116382364	0.446464	0.156819	0.289645	1.10666e-11	2.89886e-10		cg08984023	10	64133896	ZNF365	chr10:64133789-64134420	0.535831	0.263202	0.272629	1.83825e-06	5.30258e-05		cg12163730	1	160000000	KCNJ10	chr1:160040128-160040668	0.350681	0.068594	0.282087	6.65796e-09	1.15924e-07		CEACAM5|1048	-1.22089	12.2474	1.11948e-20	1.23454e-19		CRTAC1|55118	1.3586	-2.06194	7.08e-06	3.97e-05		CDH2|1000	-1.77034	2.21701	5.66e-21	1.2e-19
cg24106636	1	116381475	NHLH2	chr1:116380359-116382364	0.56635	0.17669	0.38966	4.07066e-13	1.53545e-11		cg13763181	10	71087979	HK1		0.39665	0.125415	0.271235	2.46068e-07	1.10379e-05		cg11659961	1	160000000	VANGL2	chr1:160370112-160370658	0.404622	0.115779	0.288843	1.86916e-09	3.68698e-08		CEACAM6|4680	-1.30561	10.69	8.80626e-15	6.21696e-14		CRTAM|56253	1.94254	-0.0755774	6.57e-16	2.81e-14		CDH22|64405	-2.60219	-1.53539	6.05e-08	2.47e-07
cg21646199	1	116381654	NHLH2	chr1:116380359-116382364	0.501652	0.220952	0.2807	2.13541e-12	6.66522e-11		cg27268279	10	71672083	COL13A1		0.552028	0.253029	0.298998	8.50764e-11	2.94232e-08		cg13428480	1	160000000	VANGL2	chr1:160370112-160370658	0.49909	0.0887412	0.410348	3.54698e-13	1.89067e-11		CEACAM7|1087	-1.03383	7.55446	0.00018165	0.000414957		CRYBA2|1412	2.5836	-0.102557	1.01e-11	1.92e-10		CDH23|64072	-1.24118	0.806063	1.11e-12	8.48e-12
cg02126788	1	116381660	NHLH2	chr1:116380359-116382364	0.484085	0.199629	0.284456	3.14937e-12	9.43062e-11		cg15909933	10	72201008	NODAL	chr10:72200065-72201368	0.497909	0.219103	0.278806	7.63686e-08	4.43766e-06		cg24588482	1	160000000	VANGL2	chr1:160370112-160370658	0.511557	0.0796759	0.431881	4.69619e-12	1.78173e-10		CEACAM8|1088	-1.92449	1.26032	1.96457e-08	7.48196e-08		CRYBA4|1413	1.89672	-1.65215	6.15e-06	3.5e-05		CDH26|60437	-1.81071	-1.20754	5.5e-14	4.95e-13
cg03847796	1	116653399	C1orf161		0.609663	0.315604	0.29406	1.82888e-10	3.60414e-09		cg22839123	10	73157611	CDH23	chr10:73156164-73157954	0.53265	0.281506	0.251144	2.07347e-07	9.69776e-06		cg07346851	1	160000000	VANGL2	chr1:160370112-160370658	0.346351	0.0541072	0.292244	1.92708e-08	3.02455e-07		CEBPA|1050	-1.47248	6.66184	4.30307e-39	1.68112e-37		CRYM|1428	-1.54958	3.44127	5.86e-13	1.43e-11		CDH4|1002	-1.89962	-2.18067	7.53e-08	3.04e-07
cg04403423	1	116917619	ATP1A1	chr1:116915291-116916813	0.487391	0.217439	0.269952	9.71849e-10	1.61521e-08		cg21105787	10	73847257	SPOCK2	chr10:73846806-73848233	0.537477	0.264094	0.273383	6.42267e-08	3.8662e-06		cg18398058	1	160000000	VANGL2	chr1:160370112-160370658	0.35267	0.0622753	0.290395	2.48011e-09	4.76019e-08		CECR2|27443	-1.66753	0.101526	1.50997e-08	5.80888e-08		CSDC2|27254	1.15865	-0.458052	6.99e-08	6.07e-07		CDH5|1003	-1.00153	5.27732	3.64e-20	6.87e-19
cg09478857	1	117664976	TRIM45	chr1:117664180-117665148	0.513423	0.249914	0.263508	5.50936e-10	9.70253e-09		cg13997668	10	73847532	SPOCK2	chr10:73846806-73848233	0.467093	0.122911	0.344183	5.91765e-11	2.33698e-08		cg22535359	1	160000000	VANGL2	chr1:160370112-160370658	0.342593	0.0656823	0.27691	1.3354e-09	2.72275e-08		CECR6|27439	1.00063	-0.285969	7.03245e-15	5.00627e-14		CSF1|1435	1.08131	3.86487	5.93e-19	4.62e-17		CDH7|1005	-1.11381	-2.48293	0.0077158	0.0142365
cg13898106	1	117665142	TRIM45	chr1:117664180-117665148	0.535963	0.20164	0.334324	8.82249e-18	1.20233e-15		cg15297724	10	75407414	SYNPO2L	chr10:75407413-75407706	0.508748	0.152482	0.356266	3.02316e-13	6.98125e-10		cg08004976	1	160000000	VANGL2	chr1:160370112-160370658	0.350585	0.0857217	0.264863	4.31211e-09	7.84759e-08		CEL|1056	-4.89175	6.40134	1.27489e-51	1.14381e-49		CSF1R|1436	1.21379	4.94681	1.54e-12	3.48e-11		CDH8|1006	-1.05925	-2.52513	6.1e-05	0.00016299
cg13085530	1	117665186	TRIM45	chr1:117664180-117665148	0.498025	0.211153	0.286871	2.68158e-14	1.39341e-12		cg07671858	10	75407585	SYNPO2L	chr10:75407413-75407706	0.390943	0.0710203	0.319923	6.44256e-15	6.51533e-11		cg07195126	1	160000000	VANGL2	chr1:160370112-160370658	0.439293	0.113217	0.326075	4.75994e-09	8.57584e-08		CELF3|11189	-2.62405	1.62775	1.62509e-15	1.22734e-14		CSF2|1437	1.58403	-0.226524	1.96e-07	1.55e-06		CDH9|1007	-5.33962	-2.47454	1.26e-13	1.08e-12
cg02623200	1	118727658	SPAG17	chr1:118727816-118728097	0.692773	0.372793	0.31998	1.38789e-14	7.80357e-13		cg01858517	10	79396584	KCNMA1	chr10:79396095-79398495	0.674869	0.369547	0.305322	1.22243e-09	1.93162e-07		cg10775792	1	161000000	PCP4L1	chr1:161228477-161229028	0.488646	0.223396	0.26525	3.28774e-13	1.77441e-11		CELF5|60680	-1.68931	0.943859	1.30916e-10	6.21808e-10		CSF2RB|1439	1.10259	3.68563	6.03e-09	6.49e-08		CDHR1|92211	-1.28309	5.92206	1.12e-05	3.35e-05
cg23257935	1	118727834	SPAG17	chr1:118727816-118728097	0.527213	0.249607	0.277606	2.96745e-13	1.16379e-11		cg03354113	10	79396793	KCNMA1	chr10:79396095-79398495	0.594527	0.180998	0.41353	1.75436e-14	1.3006e-10		cg27223727	1	161000000	PCP4L1	chr1:161228477-161229028	0.524793	0.192961	0.331831	2.2641e-10	5.51547e-09		CELP|1057	-4.39338	4.27142	3.81766e-37	1.32094e-35		CSF3R|1441	1.70681	3.29618	6.08e-12	1.22e-10		CDK14|5218	-1.15944	3.46317	8.03e-17	1.02e-15
cg02152120	1	118727840	SPAG17	chr1:118727816-118728097	0.536074	0.200233	0.335841	4.60806e-11	1.0443e-09		cg04688368	10	79397346	KCNMA1	chr10:79396095-79398495	0.489098	0.183251	0.305847	5.7081e-10	1.11066e-07		cg11912330	1	161000000	PCP4L1	chr1:161228477-161229028	0.609717	0.277981	0.331736	6.77274e-14	4.59468e-12		CEP170|9859	1.16922	4.09325	4.10473e-38	1.52679e-36		CSMD3|114788	1.14887	-2.54637	0.017375	0.0398594		CDK15|65061	-1.35286	-3.2556	3.88e-06	1.24e-05
cg00310968	1	118727904	SPAG17	chr1:118727816-118728097	0.493104	0.168366	0.324738	3.72523e-12	1.09669e-10		cg25655799	10	79397930	KCNMA1	chr10:79396095-79398495	0.324165	0.0559831	0.268182	2.23212e-08	1.71548e-06		cg14210287	1	162000000	FCRLB	chr1:161695637-161697298	0.660919	0.229014	0.431906	2.63896e-17	6.09886e-15		CEP170L|645455	1.24403	-0.471655	1.92119e-06	5.75133e-06		CSRP2|1466	1.13533	2.73256	1.38e-15	5.67e-14		CDK5R2|8941	-1.93795	-0.0238791	2.06e-08	9.09e-08
cg01105494	1	118727908	SPAG17	chr1:118727816-118728097	0.568553	0.242163	0.32639	1.89001e-12	5.99109e-11		cg24113782	10	79398055	KCNMA1	chr10:79396095-79398495	0.4155	0.0851567	0.330343	4.57016e-08	2.97144e-06		cg18450905	1	162000000	FCRLB	chr1:161695637-161697298	0.509122	0.194643	0.314478	1.26645e-17	3.35518e-15		CES1|1066	-3.81543	5.30144	2.63653e-34	7.56793e-33		CST1|1469	-1.22506	5.08429	0.00033861	0.00126927		CDO1|1036	-3.39646	0.95104	9.13e-26	3.43e-24
cg26100099	1	118727994	SPAG17	chr1:118727816-118728097	0.536304	0.252741	0.283563	2.89265e-11	6.87926e-10		cg09512236	10	79398415	KCNMA1	chr10:79396095-79398495	0.533845	0.275732	0.258114	2.78231e-08	2.03121e-06		cg26009555	1	162000000	FCRLB	chr1:161695637-161697298	0.480416	0.142534	0.337883	3.85998e-15	4.08079e-13		CES4|51716	-4.03841	0.862951	3.00652e-27	5.44958e-26		CST2|1470	-1.37814	1.4213	0.00041556	0.00152272		CDR1|1038	-1.05201	-2.1581	3.87e-05	0.00010641
cg16240368	1	118728086	SPAG17	chr1:118727816-118728097	0.680375	0.337925	0.34245	2.13757e-16	1.97822e-14		cg22593177	10	82174376	C10orf58		0.575944	0.322094	0.25385	6.9975e-10	1.29395e-07		cg01194901	1	162000000	FCRLB	chr1:161695637-161697298	0.387518	0.100254	0.287264	1.6358e-10	4.11159e-09		CES8|283848	-1.12812	1.67634	1.62318e-10	7.64044e-10		CST4|1472	-1.81573	1.982	5.71e-06	3.27e-05		CDRT1|374286	1.26379	-0.348013	1.18e-07	4.63e-07
cg22718139	1	120311439	HMGCS2		0.87138	0.524437	0.346943	4.31856e-20	1.13794e-17		cg02977388	10	90253615	RNLS		0.60445	0.322627	0.281823	2.29349e-10	5.76371e-08		cg22389730	1	162000000	FCRLB	chr1:161695637-161697298	0.5046	0.106566	0.398034	4.95235e-12	1.86373e-10		CFC1B|653275	-2.81876	-2.10233	9.95081e-08	3.48562e-07		CST7|8530	1.08821	2.21279	1.81e-09	2.16e-08		CEACAM20|125931	1.40877	-2.99453	0.00052732	0.0012147
cg11955541	1	145040160	PDE4DIP	chr1:145039740-145040180	0.303878	0.0475171	0.256361	1.08981e-12	3.66826e-11		cg04812509	10	90342738	RNLS	chr10:90342528-90343221	0.504817	0.217052	0.287765	3.65438e-07	1.49789e-05		cg17905084	1	162000000	FCRLB	chr1:161695637-161697298	0.394225	0.0865287	0.307696	5.67075e-11	1.59744e-09		CFD|1675	1.33863	4.37564	4.03015e-13	2.44244e-12		CTAG2|30848	-1.92565	-2.47305	0.00264019	0.00779087		CEACAM6|4680	-1.18671	10.5075	1.15e-10	6.87e-10
cg19084726	1	145075538	PDE4DIP	chr1:145075483-145075845	0.563893	0.226214	0.337678	2.02984e-22	1.00899e-19		cg19235339	10	90342899	RNLS	chr10:90342528-90343221	0.506592	0.21887	0.287722	1.02731e-06	3.34426e-05		cg22605643	1	163000000	RGS4		0.419136	0.1563	0.262836	1.12376e-07	1.50085e-06		CFH|3075	1.09031	4.3748	1.59413e-24	2.36785e-23		CTHRC1|115908	1.51447	4.72146	4.87e-16	2.15e-14		CEACAM8|1088	-1.49066	0.805865	0.0001441	0.000363
cg11935147	1	145075831	PDE4DIP	chr1:145075483-145075845	0.623101	0.363036	0.260064	1.05942e-23	7.24249e-21		cg05339066	10	90343166	RNLS	chr10:90342528-90343221	0.532321	0.214808	0.317513	8.58753e-08	4.85947e-06		cg03892631	1	163000000	RGS4		0.444703	0.155044	0.289659	2.18774e-08	3.39316e-07		CFHR3|10878	-1.07811	-2.77768	0.000497901	0.00106283		CTLA4|1493	1.09384	1.4367	5.2e-09	5.66e-08		CECR2|27443	-1.91682	0.205435	6.85e-12	4.72e-11
cg21421098	1	145473178	ANKRD34A	chr1:145472980-145474702	0.34262	0.0655522	0.277068	2.82555e-11	6.73385e-10		cg10131095	10	90343174	RNLS	chr10:90342528-90343221	0.487874	0.199253	0.288621	3.64562e-08	2.49858e-06		cg23049291	1	165000000	LMX1A	chr1:165204501-165205507	0.530894	0.226953	0.303941	3.39571e-16	5.11909e-14		CFTR|1080	-1.79537	7.72367	1.67423e-31	3.98557e-30		CTNNA3|29119	2.0965	-2.85342	4.08e-07	3.01e-06		CEL|1056	-4.70839	6.07583	2.95e-30	2.31e-28
cg04816302	1	145473213	ANKRD34A	chr1:145472980-145474702	0.398708	0.0930078	0.305701	1.47463e-14	8.24072e-13		cg06118999	10	90343192	RNLS	chr10:90342528-90343221	0.525641	0.226193	0.299448	5.70459e-08	3.53778e-06		cg00174428	1	165000000	LMX1A	chr1:165204501-165205507	0.538115	0.235824	0.302292	3.8479e-15	4.07197e-13		CH25H|9023	-1.10812	2.03783	1.64467e-14	1.13637e-13		CTSL1|1514	1.53828	6.10722	6.98e-35	4.13e-31		CELA3A|10136	2.25497	-2.86506	2.82e-08	1.22e-07
cg13947666	1	145473295	ANKRD34A	chr1:145472980-145474702	0.324131	0.0351988	0.288932	1.67276e-10	3.32552e-09		cg18192294	10	90343204	RNLS	chr10:90342528-90343221	0.516613	0.193089	0.323524	2.54099e-07	1.13168e-05		cg19317413	1	165000000	LMX1A	chr1:165204501-165205507	0.369197	0.0846701	0.284526	1.00203e-11	3.46058e-10		CHAC2|494143	1.00415	2.34415	1.58717e-18	1.52188e-17		CTSW|1521	1.9275	2.20189	7.77e-16	3.31e-14		CELF3|11189	-1.93378	0.91408	1.36e-08	6.16e-08
cg13051071	1	145473392	ANKRD34A	chr1:145472980-145474702	0.517538	0.11989	0.397648	4.82217e-19	9.53625e-17		cg06981182	10	90343208	RNLS	chr10:90342528-90343221	0.530324	0.234645	0.295679	1.69494e-07	8.29708e-06		cg27590049	1	165000000	LMX1A	chr1:165204501-165205507	0.563037	0.185176	0.377861	2.87039e-13	1.58058e-11		CHAD|1101	-1.22182	-0.0629406	1.49343e-09	6.38344e-09		CTTNBP2|83992	-2.22407	2.60719	1.73e-17	1e-15		CELF4|56853	-1.38997	-1.6672	4.51e-07	1.64e-06
cg10178263	1	145473631	ANKRD34A	chr1:145472980-145474702	0.466301	0.139537	0.326764	1.84235e-16	1.74127e-14		cg23967742	10	90966701	CH25H	chr10:90967555-90967900	0.519267	0.246701	0.272565	6.12139e-07	2.23402e-05		cg06872705	1	165000000	LMX1A	chr1:165204501-165205507	0.565972	0.208274	0.357698	4.51444e-13	2.32726e-11		CHGB|1114	-1.12425	1.82149	0.000965369	0.00196845		CTXN1|404217	1.14837	2.69526	8.56e-08	7.28e-07		CELP|1057	-4.13431	3.89052	6.58e-20	1.21e-18
cg18280463	1	145473698	ANKRD34A	chr1:145472980-145474702	0.361791	0.0461637	0.315627	6.24284e-12	1.73149e-10		cg10155681	10	90967233	CH25H	chr10:90967555-90967900	0.455788	0.131853	0.323935	3.2748e-10	7.39923e-08		cg23689712	1	165000000	LMX1A	chr1:165204501-165205507	0.506021	0.228588	0.277433	2.81566e-21	3.90165e-18		CHI3L2|1117	1.11762	-0.508198	8.77459e-08	3.09424e-07		CWH43|80157	-2.86728	1.75283	2.57e-10	3.59e-09		CER1|9350	-3.7554	-1.76255	5.83e-10	3.16e-09
cg01229562	1	145473700	ANKRD34A	chr1:145472980-145474702	0.370106	0.0757673	0.294339	2.02918e-13	8.30463e-12		cg17984375	10	90967612	CH25H	chr10:90967555-90967900	0.445213	0.17669	0.268522	1.17023e-06	3.70588e-05		cg05099491	1	165000000	LMX1A	chr1:165204501-165205507	0.46001	0.171718	0.288292	1.88958e-13	1.1026e-11		CHIT1|1118	2.20802	1.76609	5.04434e-16	3.97799e-15		CX3CL1|6376	1.55681	5.52472	9.52e-12	1.83e-10		CES1|1066	-3.99741	5.32651	1.53e-39	7.34e-37
cg01000615	1	145562817	ANKRD35		0.505183	0.226882	0.278301	2.66145e-14	1.38467e-12		cg08436313	10	90967700	CH25H	chr10:90967555-90967900	0.53709	0.274837	0.262253	5.76095e-08	3.56385e-06		cg16967640	1	165000000	LMX1A	chr1:165204501-165205507	0.455583	0.137947	0.317636	4.04483e-11	1.18495e-09		CHN2|1124	-2.05264	5.25372	1.11408e-36	3.74592e-35		CXCL10|3627	2.34277	5.61372	7.53e-20	7.31e-18		CES4|51716	-3.68268	0.392815	5.57e-26	2.14e-24
cg05803361	1	145727320	PDZK1		0.706737	0.41736	0.289377	8.65491e-13	2.9827e-11		cg27018185	10	90967894	CH25H	chr10:90967555-90967900	0.569288	0.30355	0.265738	2.55043e-07	1.13526e-05		cg16524049	1	165000000	LMX1A	chr1:165204501-165205507	0.687874	0.309538	0.378336	2.12832e-15	2.48383e-13		CHODL|140578	-1.64541	-1.31251	4.87425e-11	2.4181e-10		CXCL11|6373	1.5986	4.87936	5.59e-09	6.05e-08		CES7|221223	-2.93207	-3.34674	1.6e-07	6.18e-07
cg02304233	1	147070522	BCL9	chr1:147071249-147071875	0.496072	0.223928	0.272144	1.03942e-09	1.71526e-08		cg26135506	10	92617562	HTR7	chr10:92616820-92618034	0.507007	0.183826	0.323181	7.96629e-10	1.42459e-07		cg05127450	1	165000000	LMX1A	chr1:165321703-165322318	0.515026	0.253959	0.261068	5.66229e-11	1.59552e-09		CHP2|63928	-1.99726	4.85252	1.3325e-12	7.67186e-12		CXCL13|10563	1.77187	3.40538	4.26e-10	5.72e-09		CFC1B|653275	-2.83768	-2.13762	1.99e-06	6.62e-06
cg17417878	1	147230452	GJA5		0.714356	0.43366	0.280696	6.09919e-19	1.16724e-16		cg12639324	10	92617735	HTR7	chr10:92616820-92618034	0.498585	0.199681	0.298904	3.81849e-10	8.28903e-08		cg07135032	1	165000000	LMX1A	chr1:165321703-165322318	0.496974	0.215648	0.281326	1.08593e-10	2.85373e-09		CHRFAM7A|89832	2.62928	1.05718	4.23014e-43	2.22787e-41		CXCL14|9547	-2.34432	6.61918	4.33e-17	2.33e-15		CFH|3075	-1.01208	5.83307	3.84e-09	1.87e-08
cg24629122	1	149889330	SV2A		0.475277	0.198227	0.277049	2.8388e-08	3.32701e-07		cg00967901	10	92617915	HTR7	chr10:92616820-92618034	0.552824	0.123004	0.42982	7.13616e-12	5.70263e-09		cg27440715	1	165000000	LMX1A	chr1:165324191-165326328	0.497345	0.245739	0.251606	1.01411e-16	1.86233e-14		CHRM1|1128	1.4474	0.541652	6.80393e-12	3.64359e-11		CXCL5|6374	2.025	5.47101	1.18e-06	7.91e-06		CFHR1|3078	-2.19263	2.44149	0.00013823	0.00034933
cg01705587	1	149889364	SV2A		0.527089	0.274171	0.252918	3.86847e-19	7.84598e-17		cg26332534	10	92618063	HTR7	chr10:92616820-92618034	0.462722	0.15424	0.308482	5.00147e-08	3.18803e-06		cg09248345	1	165000000	LMX1A	chr1:165324191-165326328	0.440765	0.083748	0.357017	3.65392e-12	1.43072e-10		CHRNA2|1135	-3.1354	-2.9272	3.99214e-08	1.46869e-07		CXCL6|6372	1.06738	1.58056	7.64e-05	0.00033694		CFHR2|3080	-9.52658	0.969823	2.48e-13	2.05e-12
cg12072973	1	150121727	PLEKHO1	chr1:150121695-150123078	0.415849	0.16575	0.250099	2.15816e-06	1.6066e-05		cg12583095	10	92618141	HTR7	chr10:92616820-92618034	0.597475	0.255642	0.341833	2.80136e-12	3.14779e-09		cg04351049	1	165000000	LMX1A	chr1:165324191-165326328	0.441683	0.0856958	0.355987	7.63965e-15	7.29266e-13		CHRNA7|1139	2.87837	0.630788	2.0702e-27	3.78703e-26		CXCL9|4283	2.50537	5.87594	1.7e-25	6.57e-23		CFHR3|10878	-4.60718	-0.345337	9.35e-18	1.33e-16
cg07702853	1	150254280	C1orf51	chr1:150254365-150254637	0.565323	0.312017	0.253306	1.60555e-06	1.23312e-05		cg06854084	10	101292507	NKX2-3	chr10:101292436-101292851	0.549042	0.292517	0.256525	5.1189e-08	3.24876e-06		cg09069138	1	165000000	LMX1A	chr1:165324191-165326328	0.532237	0.211603	0.320634	7.78179e-17	1.4936e-14		CHRNB2|1141	1.29727	0.0733917	3.96657e-06	1.14243e-05		CXCR1|3577	1.21428	0.840481	0.00014996	0.00061572		CFHR4|10877	-6.76359	-1.04722	2.92e-12	2.12e-11
cg15720675	1	150293256	PRPF3	chr1:150293835-150294140	0.774863	0.500633	0.27423	2.22724e-13	9.01829e-12		cg04975330	10	101294978	NKX2-3	chr10:101294443-101297263	0.382054	0.114561	0.267494	2.45117e-09	3.24107e-07		cg16596102	1	166000000	FAM78B	chr1:166134258-166136448	0.373167	0.056561	0.316606	5.23197e-12	1.95766e-10		CHST11|50515	1.10705	2.06361	1.09867e-20	1.21459e-19		CXCR2P1|3580	1.30596	0.439473	6.01e-06	3.43e-05		CFHR5|81494	-8.32377	0.0754952	5.45e-13	4.31e-12
cg13072446	1	151019727	C1orf56;BNIPL	chr1:151020162-151020627	0.857314	0.601892	0.255422	2.53333e-18	4.07775e-16		cg14506196	10	101295400	NKX2-3	chr10:101294443-101297263	0.429847	0.144305	0.285541	4.81859e-08	3.09294e-06		cg09279615	1	166000000	FAM78B	chr1:166134258-166136448	0.449897	0.0745178	0.375379	4.97326e-11	1.42043e-09		CHST13|166012	-2.0907	1.90262	8.3211e-17	7.04099e-16		CXCR4|7852	1.13236	5.80581	2.93e-10	4.05e-09		CFTR|1080	-1.22187	7.14077	4.33e-10	2.4e-09
cg04065086	1	151104186	SEMA6C	chr1:151103685-151106100	0.540763	0.206224	0.334539	5.73566e-15	3.58893e-13		cg22735222	10	101295724	NKX2-3	chr10:101294443-101297263	0.478465	0.159776	0.318689	3.13715e-09	3.90183e-07		cg07198881	1	166000000	FAM78B	chr1:166134258-166136448	0.533665	0.25292	0.280745	2.10475e-11	6.67468e-10		CHST15|51363	1.32825	3.77859	9.1238e-35	2.73316e-33		CXorf30|645090	2.29727	-3.29923	6.57e-05	0.00029522		CGB|1082	-4.21754	0.901539	1.35e-12	1.02e-11
cg07371589	1	151104367	SEMA6C	chr1:151103685-151106100	0.667288	0.20177	0.465519	3.92852e-14	1.94388e-12		cg03711485	10	101296036	NKX2-3	chr10:101294443-101297263	0.773135	0.499356	0.273779	1.13046e-07	6.03893e-06		cg02229993	1	166000000	FAM78B	chr1:166134258-166136448	0.491516	0.113917	0.377599	3.03998e-11	9.23792e-10		CHST4|10164	2.08197	1.90824	3.87335e-10	1.76011e-09		CXorf48|54967	-1.7766	-3.41449	0.00093186	0.00310602		CGB1|114335	-5.5553	0.267746	3.11e-09	1.53e-08
cg02698576	1	151104750	SEMA6C	chr1:151103685-151106100	0.680627	0.335885	0.344742	6.98315e-14	3.22721e-12		cg16631199	10	101841253	CPN1		0.850887	0.584518	0.26637	4.82463e-11	2.03006e-08		cg16403669	1	166000000	FAM78B	chr1:166134258-166136448	0.433012	0.162305	0.270708	7.11105e-12	2.56551e-10		CHST5|23563	1.0516	4.24694	5.04979e-06	1.43542e-05		CXorf57|55086	1.03115	1.07481	6.7e-06	3.78e-05		CGB2|114336	-4.20535	0.204389	7.36e-08	2.97e-07
cg09143801	1	151105049	SEMA6C	chr1:151103685-151106100	0.536742	0.200786	0.335956	7.83612e-10	1.32902e-08		cg02460314	10	101841285	CPN1		0.901748	0.617906	0.283843	8.22623e-09	8.02675e-07		cg06445348	1	167000000	ILDR2	chr1:166916865-166917215	0.662914	0.331506	0.331408	8.52017e-14	5.59257e-12		CHST6|4166	2.71604	1.81023	3.81104e-71	1.26004e-68		CXXC4|80319	-1.20691	-1.34482	2.59e-06	1.6e-05		CGB5|93659	-3.88634	0.764155	2.76e-10	1.57e-09
cg13331550	1	151118416	SEMA6C	chr1:151118049-151119373	0.528455	0.241866	0.286589	1.55632e-13	6.57115e-12		cg23197945	10	101841303	CPN1		0.846005	0.485045	0.360959	3.85218e-11	1.75712e-08		cg02079933	1	168000000	RCSD1	chr1:167599464-167599839	0.554101	0.236772	0.317329	8.18278e-20	5.32109e-17		CHST9|83539	3.17275	-2.34526	4.42256e-16	3.50935e-15		CYBB|1536	1.40261	5.23964	1.32e-16	6.43e-15		CGB7|94027	-3.99102	-0.133712	3.69e-13	2.98e-12
cg01966665	1	151137376	SCNM1;LYSMD1		0.547229	0.270153	0.277075	1.62171e-14	8.9653e-13		cg25531836	10	102586999	PAX2	chr10:102586125-102588109	0.43065	0.105156	0.325494	2.26533e-10	5.70762e-08		cg18800085	1	168000000	RCSD1	chr1:167599464-167599839	0.630346	0.295315	0.335031	2.64023e-16	4.1169e-14		CIDEC|63924	1.01101	1.15549	6.82033e-07	2.16327e-06		CYP1B1|1545	2.05285	2.2845	2.69e-18	1.83e-16		CGB8|94115	-4.63928	0.64184	7.59e-11	4.61e-10
cg06902698	1	151137676	SCNM1;LYSMD1		0.580229	0.282208	0.298021	1.37714e-13	5.89178e-12		cg26439963	10	102587110	PAX2	chr10:102586125-102588109	0.40532	0.0546193	0.350701	2.59971e-09	3.38257e-07		cg00100121	1	169000000	C1orf114	chr1:169396621-169396869	0.652905	0.395848	0.257057	3.68382e-10	8.56625e-09		CIITA|4261	2.85915	4.02685	9.70684e-75	4.03037e-72		CYP21A2|1589	1.39425	-0.80367	1.59e-07	1.27e-06		CGNL1|84952	-1.35588	3.39098	1.05e-12	8e-12
cg10963543	1	151226935	PSMD4		0.430454	0.138008	0.292446	2.50326e-09	3.77454e-08		cg23206032	10	102587844	PAX2	chr10:102586125-102588109	0.445068	0.137654	0.307414	3.68367e-08	2.51773e-06		cg26048630	1	171000000	PRRX1		0.479556	0.218694	0.260862	7.21907e-10	1.56689e-08		CILP|8483	1.99486	1.30105	9.11922e-22	1.10233e-20		CYP2B6|1555	-1.60945	3.86066	1.74e-07	1.39e-06		CH25H|9023	-1.84452	2.58154	1.39e-28	8.23e-27
cg25199322	1	151693838	C1orf230	chr1:151693991-151694282	0.334133	0.0778921	0.256241	2.832e-07	2.6151e-06		cg16574134	10	102588315	PAX2	chr10:102590122-102590402	0.615685	0.337772	0.277913	6.12017e-07	2.23385e-05		cg06211893	1	172000000	DNM3	chr1:171810467-171811325	0.485968	0.22105	0.264919	7.86586e-09	1.34723e-07		CITED1|4435	1.69796	0.836925	1.62032e-20	1.76829e-19		CYP39A1|51302	-1.53176	3.15444	8.27e-19	6.21e-17		CHAC2|494143	1.31772	2.31086	5.21e-27	2.42e-25
cg06100368	1	151694123	C1orf230	chr1:151693991-151694282	0.307608	0.0488435	0.258764	1.56202e-08	1.95037e-07		cg06921011	10	102589467	PAX2	chr10:102590122-102590402	0.571285	0.309586	0.261699	4.25672e-11	1.88864e-08		cg05377226	1	172000000	DNM3	chr1:171810467-171811325	0.521712	0.228299	0.293413	1.01465e-08	1.69442e-07		CKB|1152	-2.3086	9.38847	4.52972e-24	6.49066e-23		CYP4F22|126410	1.34749	-2.24887	2.43e-09	2.82e-08		CHAD|1101	-1.13413	-0.194953	4.89e-07	1.77e-06
cg05523911	1	152081002	TCHH	chr1:152079997-152081705	0.610789	0.281933	0.328856	6.5279e-09	8.92364e-08		cg08174373	10	102989254	FLJ41350;LBX1	chr10:102984182-102990063	0.535556	0.258923	0.276634	1.79704e-06	5.20214e-05		cg23391785	1	172000000	DNM3	chr1:171810467-171811325	0.497433	0.236941	0.260492	1.3513e-09	2.75077e-08		CKM|1158	-2.03728	-1.08982	1.26954e-15	9.67406e-15		CYP4F8|11283	1.2605	-1.49249	0.018916	0.0428525		CHAF1B|8208	1.12684	3.99708	2.81e-49	5.39e-46
cg04986781	1	152081317	TCHH	chr1:152079997-152081705	0.620253	0.368374	0.251879	1.08895e-08	1.41023e-07		cg07037112	10	103534934	FGF8	chr10:103535636-103536505	0.530226	0.2315	0.298726	1.97239e-12	2.54825e-09		cg26839871	1	172000000	DNM3	chr1:171810467-171811325	0.556551	0.243224	0.313327	4.034e-11	1.1826e-09		CKMT2|1160	-1.83212	4.36327	8.77057e-07	2.74142e-06		CYP7B1|9420	1.27092	-0.594022	3.42e-10	4.68e-09		CHGA|1113	-1.85376	4.13159	1.3e-05	3.86e-05
cg03438305	1	152082925	TCHH	chr1:152083021-152084240	0.441741	0.172636	0.269105	2.2918e-11	5.57877e-10		cg24383507	10	103600846	KCNIP2	chr10:103603166-103603642	0.657719	0.389965	0.267754	3.7121e-06	9.21509e-05		cg16515523	1	172000000	DNM3	chr1:171810467-171811325	0.461796	0.168628	0.293168	7.64282e-11	2.08236e-09		CLCA2|9635	1.05362	-1.77753	0.000571062	0.00120831		CYSLTR2|57105	1.14879	-1.21382	4.91e-06	2.86e-05		CHGB|1114	-3.26652	3.65678	1.87e-12	1.38e-11
cg05464302	1	152083029	TCHH	chr1:152083021-152084240	0.373997	0.106654	0.267343	5.20689e-11	1.16471e-09		cg17962384	10	103601188	KCNIP2	chr10:103603166-103603642	0.544363	0.196755	0.347608	1.60804e-10	4.5831e-08		cg17014785	1	174000000	ANKRD45	chr1:173638662-173639045	0.738434	0.432484	0.30595	1.61206e-16	2.71088e-14		CLCN2|1181	-1.2642	5.237	8.59982e-39	3.2738e-37		CYTH4|27128	1.3137	3.43309	4.05e-17	2.18e-15		CHI3L2|1117	-1.05116	0.928942	2.76e-05	7.77e-05
cg10234068	1	152083276	TCHH	chr1:152083021-152084240	0.531374	0.124472	0.406902	1.54386e-10	3.09168e-09		cg05762694	10	103990984	PITX3	chr10:103990213-103991829	0.446705	0.1355	0.311205	5.887e-08	3.62257e-06		cg07107171	1	176000000	TNR		0.422434	0.156011	0.266423	3.1338e-09	5.8794e-08		CLCNKB|1188	-1.0315	-2.81015	0.000810769	0.00167269		CYTL1|54360	1.4053	-1.01945	1.34e-09	1.64e-08		CHL1|10752	-1.47113	1.95999	4.28e-13	3.43e-12
cg24645670	1	152083292	TCHH	chr1:152083021-152084240	0.492669	0.113868	0.378801	6.5461e-10	1.13117e-08		cg07754999	10	103991057	PITX3	chr10:103990213-103991829	0.585724	0.291514	0.29421	2.66218e-05	0.000434089		cg23492043	1	177000000	ASTN1	chr1:177133392-177133846	0.538089	0.284565	0.253524	3.1687e-10	7.46369e-09		CLDN10|9071	-1.79937	0.456111	0.000731256	0.00151883		D4S234E|27065	-1.63736	1.61135	2.49e-11	4.33e-10		CHN2|1124	-1.3828	4.57305	3.42e-16	4.03e-15
cg24880024	1	152083709	TCHH	chr1:152083021-152084240	0.507323	0.0377437	0.469579	1.35306e-12	4.45064e-11		cg20641465	10	103991465	PITX3	chr10:103990213-103991829	0.495733	0.189052	0.306681	3.82852e-09	4.52929e-07		cg02102020	1	177000000	FAM5B	chr1:177150814-177151165	0.402313	0.13456	0.267753	6.64929e-13	3.261e-11		CLDN15|24146	-1.58651	5.47137	2.00269e-15	1.4992e-14		DACH1|1602	-1.52857	4.70074	2.47e-10	3.46e-09		CHODL|140578	-2.36804	-0.824517	4.44e-18	6.53e-17
cg18287591	1	152085133	TCHH	chr1:152084994-152085215	0.368444	0.113545	0.254899	5.17647e-12	1.46978e-10		cg22882178	10	104001226	PITX3	chr10:104000254-104001741	0.494502	0.208727	0.285775	3.89496e-09	4.58092e-07		cg06321345	1	177000000	FAM5B	chr1:177150814-177151165	0.485904	0.07288	0.413024	1.14157e-12	5.19438e-11		CLDN18|51208	7.87943	5.1589	1.712e-82	1.27358e-79		DACT2|168002	1.2154	1.65212	0.00169953	0.00529084		CHP2|63928	-1.58261	4.39254	7.03e-07	2.49e-06
cg20795569	1	152085136	TCHH	chr1:152084994-152085215	0.391143	0.0217852	0.369358	7.65538e-13	2.68167e-11		cg13325154	10	104001240	PITX3	chr10:104000254-104001741	0.554031	0.191061	0.36297	1.27503e-09	1.99312e-07		cg03884587	1	177000000	FAM5B	chr1:177150814-177151165	0.422503	0.112056	0.310447	8.46412e-13	4.0201e-11		CLDN3|1365	-1.16174	9.02645	1.09499e-15	8.37978e-15		DAPK2|23604	-1.3671	4.27755	2.21e-19	1.9e-17		CHRD|8646	-1.0713	2.57127	3.1e-17	4.15e-16
cg00584000	1	152085187	TCHH	chr1:152084994-152085215	0.473713	0.0729962	0.400716	3.24389e-12	9.68498e-11		cg27649073	10	104001259	PITX3	chr10:104000254-104001741	0.602216	0.25621	0.346006	2.20862e-09	3.00978e-07		cg12042448	1	177000000	FAM5B	chr1:177150814-177151165	0.400732	0.0957555	0.304976	1.66487e-10	4.17893e-09		CLDN8|9073	-3.60433	1.22741	3.90958e-10	1.77567e-09		DAZ1|1617	-5.1394	2.74005	1.97e-09	2.34e-08		CHRDL1|91851	-2.78195	4.09911	7.03e-23	1.89e-21
cg09873164	1	152488093	CRCT1	chr1:152487978-152488270	0.630492	0.264381	0.366111	2.30387e-12	7.12882e-11		cg14681055	10	104001261	PITX3	chr10:104000254-104001741	0.581351	0.213509	0.367841	2.73716e-10	6.47896e-08		cg27174972	1	177000000	FAM5B	chr1:177150814-177151165	0.570921	0.236815	0.334106	4.28237e-11	1.2457e-09		CLDN9|9080	-1.51145	1.5048	8.83175e-11	4.26744e-10		DAZ2|57055	-6.48488	0.678231	5.97e-11	9.59e-10		CHRDL2|25884	-2.37138	4.38084	1.62e-13	1.37e-12
cg03352287	1	152488262	CRCT1	chr1:152487978-152488270	0.535015	0.119266	0.415749	1.59054e-13	6.69829e-12		cg14021564	10	104169126	PSD	chr10:104168558-104169153	0.341903	0.0884946	0.253408	1.34196e-07	6.90588e-06		cg01931994	1	177000000	FAM5B		0.444939	0.190442	0.254497	1.01173e-10	2.67721e-09		CLEC12A|160364	2.12991	-0.273101	5.79233e-34	1.6286e-32		DAZ3|57054	-7.49169	1.52726	1.95e-12	4.33e-11		CHRFAM7A|89832	1.18368	1.81255	1.29e-07	5.05e-07
cg22723818	1	152488368	CRCT1	chr1:152487978-152488270	0.712395	0.38582	0.326575	2.11174e-18	3.4911e-16		cg00086670	10	104629122	AS3MT	chr10:104629038-104629479	0.627693	0.237224	0.390469	5.52563e-11	2.23817e-08		cg26272214	1	177000000	FAM5B		0.683743	0.389965	0.293778	3.49925e-11	1.04623e-09		CLEC2B|9976	1.72467	1.86352	5.64082e-50	4.57778e-48		DAZL|1618	1.18672	-3.08112	0.00021062	0.00083472		CHRM1|1128	1.02559	0.864616	1.46e-05	4.3e-05
cg15131647	1	153650884	NPR1	chr1:153650830-153652375	0.468181	0.195712	0.272469	1.10475e-11	2.89489e-10		cg25143771	10	104629124	AS3MT	chr10:104629038-104629479	0.635241	0.303136	0.332104	2.03173e-10	5.32491e-08		cg08186924	1	180000000	NPHS2	chr1:179544720-179545307	0.549869	0.271	0.278869	8.09541e-13	3.866e-11		CLEC2L|154790	-1.72087	-1.62447	4.98783e-06	1.42007e-05		DBH|1621	-2.21883	-0.152084	7.44e-08	6.41e-07		CHRM2|1129	-3.00122	-0.047145	9.61e-12	6.53e-11
cg04484579	1	153651568	NPR1	chr1:153650830-153652375	0.476783	0.123894	0.352889	1.76566e-14	9.65012e-13		cg08856941	10	104629142	AS3MT	chr10:104629038-104629479	0.612562	0.221825	0.390737	1.39233e-10	4.1038e-08		cg08229358	1	180000000	NPHS2	chr1:179544720-179545307	0.622752	0.28215	0.340602	1.09138e-11	3.73136e-10		CLEC3A|10143	-2.72006	-2.77037	8.06075e-07	2.53152e-06		DBN1|1627	1.40739	6.00712	8.83e-19	6.54e-17		CHRNA2|1135	-2.80176	-3.28412	2.96e-09	1.46e-08
cg23098020	1	153651886	NPR1	chr1:153650830-153652375	0.493385	0.144957	0.348427	5.08156e-18	7.46643e-16		cg24592962	10	104629151	AS3MT	chr10:104629038-104629479	0.620584	0.18311	0.437473	7.29728e-11	2.6808e-08		cg10980436	1	180000000	NPHS2	chr1:179544720-179545307	0.342584	0.0900394	0.252545	7.93343e-12	2.82467e-10		CLEC4A|50856	1.13298	1.13453	1.0029e-20	1.11424e-19		DCBLD2|131566	1.53801	5.39618	4.18e-12	8.66e-11		CHRNA3|1136	-1.82842	2.02295	1.72e-18	2.65e-17
cg05511392	1	153651938	NPR1	chr1:153650830-153652375	0.582681	0.154415	0.428266	8.65052e-19	1.57871e-16		cg11784071	10	104629166	AS3MT	chr10:104629038-104629479	0.573619	0.152396	0.421222	1.20151e-09	1.90062e-07		cg06515144	1	180000000	NPHS2	chr1:179544720-179545307	0.410504	0.0778081	0.332696	2.89478e-12	1.16825e-10		CLEC4D|338339	2.30549	-2.33082	1.25871e-28	2.48871e-27		DCHS2|54798	3.10334	-0.482189	1.89e-13	5.07e-12		CHRNA4|1137	-4.91363	-2.07005	4.57e-11	2.84e-10
cg26246928	1	153652122	NPR1	chr1:153650830-153652375	0.451137	0.0758908	0.375246	5.44735e-18	7.92642e-16		cg26207201	10	104629179	AS3MT	chr10:104629038-104629479	0.531166	0.133663	0.397503	1.32619e-09	2.04888e-07		cg20701486	1	180000000	NPHS2	chr1:179544720-179545307	0.341756	0.0574884	0.284268	1.83831e-09	3.63076e-08		CLEC4E|26253	2.20508	0.458703	3.60914e-35	1.10908e-33		DCLK1|9201	1.33075	-0.272735	1.89e-08	1.84e-07		CHRNA7|1139	1.49813	1.33255	4.41e-07	1.61e-06
cg14178748	1	153652247	NPR1	chr1:153650830-153652375	0.517787	0.060812	0.456975	8.51843e-17	8.83399e-15		cg15434569	10	105253716	NEURL	chr10:105253191-105254428	0.344917	0.0785865	0.266331	1.98995e-07	9.38876e-06		cg13931925	1	180000000	NPHS2	chr1:179544720-179545307	0.371861	0.0810443	0.290817	4.56325e-13	2.35077e-11		CLEC4G|339390	1.93853	-2.49291	2.94567e-18	2.7753e-17		DDC|1644	-1.10168	5.765	2.82e-07	2.15e-06		CHRNB4|1143	-1.3427	-1.33352	3.36e-09	1.65e-08
cg06824583	1	154297643	AQP10;ATP8B2	chr1:154298205-154298544	0.382201	0.113657	0.268545	3.79925e-12	1.1159e-10		cg25066490	10	105253950	NEURL	chr10:105253191-105254428	0.372177	0.074463	0.297714	5.12387e-07	1.94274e-05		cg19016332	1	180000000	NPHS2	chr1:179544720-179545307	0.481653	0.208363	0.27329	4.68102e-12	1.77736e-10		CLEC5A|23601	2.40411	1.33592	1.0512e-78	5.86506e-76		DDO|8528	-1.33423	1.08734	4.57e-09	5.03e-08		CHRND|1144	-3.4448	-3.27481	2.26e-08	9.91e-08
cg07911225	1	154474108	SHE;TDRD10	chr1:154474107-154475699	0.544003	0.211765	0.332237	7.28659e-20	1.78351e-17		cg02930888	10	112402954	RBM20	chr10:112402953-112404328	0.525755	0.261183	0.264572	2.49994e-09	3.28335e-07		cg13059719	1	180000000	FAM163A	chr1:179711947-179713951	0.528406	0.249908	0.278498	1.85318e-14	1.53442e-12		CLEC6A|93978	1.7794	-2.63794	8.50893e-15	6.01419e-14		DDR2|4921	1.24233	1.54787	4.7e-12	9.59e-11		CHST10|9486	-1.34543	1.84975	1.21e-21	2.78e-20
cg16683920	1	154474344	SHE;TDRD10	chr1:154474107-154475699	0.595478	0.234907	0.360571	1.73235e-14	9.50173e-13		cg16790416	10	112403098	RBM20	chr10:112402953-112404328	0.466707	0.178199	0.288508	3.44887e-12	3.56151e-09		cg09683824	1	180000000	FAM163A	chr1:179711947-179713951	0.530942	0.263934	0.267008	5.97225e-13	2.97371e-11		CLEC7A|64581	1.47694	2.11477	4.44405e-30	9.62914e-29		DDX53|168400	-2.12953	-3.0915	0.00265924	0.00784318		CHST13|166012	-1.66421	1.42697	2.68e-11	1.73e-10
cg16899920	1	154474518	SHE;TDRD10	chr1:154474107-154475699	0.532425	0.249813	0.282612	3.27667e-20	8.93094e-18		cg03871549	10	112403448	RBM20	chr10:112402953-112404328	0.403344	0.130059	0.273285	2.9442e-10	6.84812e-08		cg00181968	1	180000000	FAM163A	chr1:179711947-179713951	0.534129	0.273924	0.260205	8.93754e-13	4.21816e-11		CLGN|1047	-2.13377	0.682658	1.88666e-11	9.72412e-11		DEFB1|1672	-1.58699	1.21653	1.12e-07	9.24e-07		CHST4|10164	1.64222	2.27166	1.07e-05	3.19e-05
cg19970699	1	154474528	SHE;TDRD10	chr1:154474107-154475699	0.5992	0.286024	0.313176	8.35495e-21	2.67793e-18		cg06237092	10	112403495	RBM20	chr10:112402953-112404328	0.370951	0.0989328	0.272018	2.03271e-08	1.59057e-06		cg17836735	1	180000000	LHX4	chr1:180198119-180204975	0.289698	0.0332517	0.256447	3.22351e-09	6.02843e-08		CLIC2|1193	1.01986	2.23716	3.70861e-19	3.71986e-18		DEFB103B|414325	1.90233	-2.82876	0.00407716	0.0114623		CHST6|4166	1.37094	2.51917	2.66e-12	1.93e-11
cg02856953	1	154474530	SHE;TDRD10	chr1:154474107-154475699	0.635327	0.280214	0.355113	3.82094e-20	1.02057e-17		cg08675654	10	112403955	RBM20	chr10:112402953-112404328	0.478421	0.148379	0.330042	2.5098e-11	1.3074e-08		cg24198584	1	180000000	LHX4	chr1:180198119-180204975	0.578034	0.161766	0.416268	4.16522e-17	8.94261e-15		CLIP4|79745	1.09862	1.30093	1.09243e-17	9.86055e-17		DES|1674	1.50377	5.67801	4.19e-06	2.49e-05		CHST8|64377	-2.95881	-1.66848	1.36e-12	1.02e-11
cg18713316	1	154732860	KCNN3	chr1:154732822-154733436	0.466791	0.196093	0.270698	5.59058e-12	1.57304e-10		cg00379708	10	112404380	RBM20	chr10:112402953-112404328	0.502959	0.250073	0.252886	9.16744e-08	5.11867e-06		cg00838919	1	180000000	LHX4	chr1:180198119-180204975	0.57183	0.2814	0.290431	7.76643e-13	3.72662e-11		CLLU1|574028	-1.11504	-1.87909	0.000115043	0.000270402		DFNA5|1687	1.30959	1.29664	4.14e-14	1.28e-12		CHSY3|337876	-1.02804	1.62165	8.6e-18	1.22e-16
cg23597057	1	154733198	KCNN3	chr1:154732822-154733436	0.437085	0.106008	0.331077	4.49584e-10	8.08017e-09		cg16349964	10	112404438	RBM20	chr10:112402953-112404328	0.370001	0.067494	0.302507	9.56885e-11	3.18537e-08		cg08647912	1	180000000	LHX4	chr1:180198119-180204975	0.518415	0.25574	0.262675	4.37834e-11	1.26959e-09		CLNK|116449	1.28364	-3.2092	5.16007e-09	2.08765e-08		DGCR10|26222	1.18574	-3.33272	0.0012831	0.00412965		CIDEA|1149	-4.01585	-0.880231	1.04e-09	5.47e-09
cg21386140	1	154733240	KCNN3	chr1:154732822-154733436	0.430162	0.131366	0.298796	2.20593e-10	4.26717e-09		cg23635429	10	116852470	ATRNL1	chr10:116852261-116854094	0.601894	0.312236	0.289657	1.01688e-07	5.55045e-06		cg26410483	1	180000000	LHX4	chr1:180198119-180204975	0.323389	0.0639045	0.259485	7.05735e-09	1.22167e-07		CLPS|1208	1.33334	-3.13662	0.00217987	0.00419526		DGCR5|26220	2.36724	-0.538891	1.01e-13	2.85e-12		CIITA|4261	1.87531	4.57025	4.32e-31	3.8e-29
cg16489975	1	154733435	KCNN3	chr1:154732822-154733436	0.793104	0.460853	0.332251	1.49978e-18	2.57373e-16		cg23764381	10	116852687	ATRNL1	chr10:116852261-116854094	0.493696	0.121863	0.371832	9.11908e-12	6.77065e-09		cg00882235	1	180000000	LHX4	chr1:180198119-180204975	0.448517	0.141233	0.307284	1.39986e-10	3.58179e-09		CLSPN|63967	1.07518	3.24893	8.27771e-30	1.77207e-28		DGCR9|25787	1.50843	-1.68714	1.29e-06	8.55e-06		CILP|8483	-1.57581	3.63682	2.27e-08	9.96e-08
cg23216745	1	154929762	PYGO2;PBXIP1		0.562984	0.297255	0.265729	1.56525e-14	8.69414e-13		cg21921619	10	116852791	ATRNL1	chr10:116852261-116854094	0.450373	0.114011	0.336362	8.02335e-14	3.3857e-10		cg05719164	1	180000000	LHX4	chr1:180198119-180204975	0.59667	0.0886783	0.507992	5.1013e-18	1.60353e-15		CLSTN2|64084	-2.86838	1.03312	2.39985e-21	2.80229e-20		DGKB|1607	-3.08933	-0.0946243	6.96e-14	2.03e-12		CILP2|148113	-1.479	1.97719	6.15e-08	2.51e-07
cg11135108	1	154929791	PYGO2;PBXIP1		0.664203	0.337809	0.326394	8.28597e-16	6.59809e-14		cg24450494	10	116852811	ATRNL1	chr10:116852261-116854094	0.313497	0.0551806	0.258317	1.78947e-10	4.92778e-08		cg11189384	1	180000000	LHX4	chr1:180198119-180204975	0.501257	0.144279	0.356978	1.36109e-15	1.68918e-13		CMA1|1215	1.26427	-3.05019	6.36874e-05	0.000155296		DGKI|9162	1.0594	-2.50495	4.95e-05	0.00022863		CITED1|4435	1.035	1.28594	1.13e-05	3.39e-05
cg23993235	1	155270943	PKLR		0.609915	0.338928	0.270987	3.51075e-13	1.35014e-11		cg05071623	10	116852865	ATRNL1	chr10:116852261-116854094	0.461915	0.061487	0.400428	7.05868e-13	1.26228e-09		cg18863156	1	180000000	LHX4	chr1:180198119-180204975	0.372408	0.10252	0.269889	7.71832e-13	3.70717e-11		CMKLR1|1240	1.35853	2.87467	2.25437e-28	4.36547e-27		DIRAS3|9077	2.49053	0.457047	6.19e-17	3.24e-15		CKB|1152	-1.60253	8.65357	7.55e-12	5.18e-11
cg02280309	1	155270960	PKLR		0.682952	0.391013	0.291939	2.16924e-18	3.57007e-16		cg04335339	10	116853118	ATRNL1	chr10:116852261-116854094	0.651392	0.129099	0.522293	4.4841e-13	9.25014e-10		cg23598080	1	180000000	LHX4	chr1:180198119-180204975	0.484392	0.132553	0.35184	1.30751e-14	1.15119e-12		CMPK2|129607	1.19584	3.7395	3.65789e-17	3.17492e-16		DIRC1|116093	1.15819	-3.21699	0.00069506	0.00239253		CKM|1158	-1.92408	-1.289	5.55e-13	4.38e-12
cg06440960	1	155828926	SYT11	chr1:155829109-155829431	0.407524	0.14393	0.263594	3.57683e-07	3.21877e-06		cg09248482	10	116853468	ATRNL1	chr10:116852261-116854094	0.444853	0.0933354	0.351517	3.98054e-13	8.39854e-10		cg18063017	1	180000000	LHX4	chr1:180198119-180204975	0.543008	0.209979	0.333029	9.74246e-12	3.37495e-10		CMTM2|146225	1.42439	-1.38646	5.96719e-17	5.10975e-16		DIRC3|729582	1.2702	-2.80639	1.5e-06	9.75e-06		CKMT2|1160	-1.21273	3.73949	0.00342408	0.00680365
cg16585911	1	155830264	SYT11	chr1:155830195-155830489	0.478434	0.144976	0.333458	2.57275e-13	1.02601e-11		cg06055013	10	116853664	ATRNL1	chr10:116852261-116854094	0.417296	0.146501	0.270796	1.38742e-10	4.10179e-08		cg26225694	1	180000000	LHX4	chr1:180198119-180204975	0.478433	0.114061	0.364372	8.69993e-14	5.68892e-12		CNDP1|84735	2.79556	-1.35881	4.38821e-16	3.48675e-15		DKFZp434J0226|93429	1.52271	-2.17965	7.3e-06	4.09e-05		CLCA2|9635	-2.75094	0.983309	9.03e-08	3.61e-07
cg24712249	1	155830294	SYT11	chr1:155830195-155830489	0.484052	0.179627	0.304425	3.24322e-11	7.6186e-10		cg24808891	10	118500755	HSPA12A	chr10:118500868-118502706	0.537403	0.26173	0.275673	4.18074e-10	8.82094e-08		cg23056823	1	181000000	KIAA1614	chr1:180881316-180882592	0.301197	0.0328395	0.268358	9.66832e-07	1.04784e-05		CNGA1|1259	-1.48206	1.33588	1.97214e-15	1.47758e-14		DKK4|27121	-2.97234	3.1221	2.72e-10	3.79e-09		CLCA3P|9629	1.30146	-2.88541	1.43e-05	4.2e-05
cg11961255	1	155830477	SYT11	chr1:155830195-155830489	0.349916	0.0539457	0.29597	1.48873e-12	4.85335e-11		cg16234557	10	119292062	EMX2OS	chr10:119293917-119297675	0.634215	0.37682	0.257395	1.25488e-05	0.00024018		cg07730364	1	181000000	KIAA1614	chr1:180881316-180882592	0.351109	0.0609161	0.290193	1.0356e-08	1.72655e-07		CNGB3|54714	-1.39453	-2.78325	0.00154521	0.00304706		DLEC1|9940	-1.21249	0.200182	4.08e-07	3.01e-06		CLCNKB|1188	-1.58006	-2.5735	9.69e-09	4.49e-08
cg13795986	1	155880507	RIT1		0.621318	0.205911	0.415407	6.6811e-18	9.43383e-16		cg02420850	10	119302157	EMX2OS;EMX2	chr10:119301321-119305368	0.47625	0.198691	0.277559	1.39332e-07	7.08685e-06		cg12604950	1	181000000	KIAA1614	chr1:180881316-180882592	0.583381	0.257736	0.325644	3.79225e-18	1.25954e-15		CNR1|1268	-1.09209	-0.735106	0.000250917	0.000561598		DLG2|1740	1.1363	-1.18028	2.29e-05	0.00011477		CLDN10|9071	-1.98427	0.519015	0.00012882	0.00032723
cg11400774	1	156051324	MEX3A	chr1:156051239-156051461	0.487194	0.113116	0.374079	1.26078e-12	4.17883e-11		cg03522063	10	119302167	EMX2OS;EMX2	chr10:119301321-119305368	0.506196	0.220019	0.286177	1.15239e-06	3.66122e-05		cg06986584	1	181000000	KIAA1614	chr1:180904316-180904711	0.870987	0.613133	0.257854	2.83508e-13	1.56378e-11		CNTD2|79935	1.5616	2.48084	1.29243e-18	1.24932e-17		DLK2|65989	1.60266	-0.833035	9.69e-08	8.09e-07		CLDN11|5010	-2.08997	1.50652	1.92e-22	4.89e-21
cg02951552	1	156051441	MEX3A	chr1:156051239-156051461	0.409518	0.0964763	0.313042	4.07267e-13	1.53563e-11		cg15325373	10	119302275	EMX2OS;EMX2	chr10:119301321-119305368	0.692595	0.37155	0.321045	4.357e-12	4.12194e-09		cg13948585	1	181000000	CACNA1E	chr1:181451311-181452049	0.532269	0.22198	0.310289	2.84081e-11	8.69667e-10		CNTN3|5067	-2.12325	0.27017	4.45432e-14	2.95971e-13		DLX1|1745	1.90386	-1.52631	2.75e-07	2.11e-06		CLDN15|24146	-1.12936	4.99684	7.49e-08	3.03e-07
cg26022183	1	156215655	PAQR6	chr1:156215368-156215899	0.342576	0.0308595	0.311716	2.1738e-08	2.62183e-07		cg03339065	10	119304583	EMX2OS;EMX2	chr10:119301321-119305368	0.572712	0.240243	0.332469	4.28661e-07	1.69474e-05		cg21963643	1	181000000	CACNA1E	chr1:181451311-181452049	0.486946	0.178721	0.308226	3.06009e-11	9.28943e-10		CNTNAP3|79937	1.56811	-0.916343	4.02968e-17	3.49421e-16		DLX3|1747	-3.03802	-0.820768	9.18e-11	1.42e-09		CLDN18|51208	2.9864	5.88249	1.93e-10	1.12e-09
cg10544251	1	156215727	PAQR6	chr1:156215368-156215899	0.360989	0.0889721	0.272017	3.74771e-09	5.41809e-08		cg24188415	10	119304586	EMX2OS;EMX2	chr10:119301321-119305368	0.537099	0.23089	0.306209	1.30241e-06	4.03386e-05		cg18533386	1	181000000	CACNA1E	chr1:181451311-181452049	0.536443	0.208183	0.32826	6.72916e-11	1.86127e-09		COL10A1|1300	1.41252	3.72251	8.41653e-12	4.46564e-11		DLX6|1750	-1.51283	-0.109779	0.00409157	0.0114901		CLDN19|149461	-2.65543	-3.03949	1.4e-07	5.45e-07
cg09938227	1	156390124	C1orf61	chr1:156390403-156391581	0.58752	0.283067	0.304453	3.73323e-11	8.64072e-10		cg19844704	10	119304705	EMX2OS;EMX2	chr10:119301321-119305368	0.50441	0.218564	0.285846	8.58949e-09	8.30561e-07		cg02974928	1	181000000	CACNA1E	chr1:181451311-181452049	0.590496	0.229389	0.361107	3.83198e-11	1.13187e-09		COL11A1|1301	1.2556	4.56047	4.68411e-13	2.82153e-12		DLX6AS|285987	-2.52837	-1.3368	8.15e-07	5.64e-06		CLDN5|7122	-1.09518	3.68559	1.92e-11	1.26e-10
cg06609427	1	156391173	MIR9-1;C1orf61	chr1:156390403-156391581	0.417986	0.139159	0.278828	3.89121e-09	5.60262e-08		cg27174438	10	119304708	EMX2OS;EMX2	chr10:119301321-119305368	0.561538	0.270928	0.29061	3.73714e-08	2.54473e-06		cg15742412	1	181000000	CACNA1E	chr1:181451311-181452049	0.565875	0.245552	0.320323	3.22507e-12	1.28336e-10		COL13A1|1305	1.00076	0.820522	4.75043e-14	3.14826e-13		DMBX1|127343	1.65611	0.527601	9.05e-09	9.36e-08		CLDN6|9074	-3.77485	-0.0514953	6.82e-13	5.32e-12
cg09793584	1	156391310	MIR9-1;C1orf61	chr1:156390403-156391581	0.574147	0.168879	0.405268	1.30053e-13	5.60574e-12		cg02892577	10	121181759	GRK5		0.797358	0.523764	0.273594	1.24396e-10	3.79629e-08		cg00304388	1	181000000	CACNA1E	chr1:181454974-181455261	0.520011	0.220392	0.29962	3.38091e-12	1.33775e-10		COL1A1|1277	1.06824	10.762	2.29883e-19	2.34132e-18		DMRT1|1761	1.58389	-3.09832	0.00236545	0.00705825		CLDN8|9073	-3.45039	0.966078	3.65e-09	1.78e-08
cg17787876	1	156467057	MEF2D	chr1:156469617-156471060	0.623677	0.2624	0.361277	1.61398e-15	1.17835e-13		cg02976719	10	122216357	PPAPDC1A	chr10:122216259-122217377	0.54127	0.235769	0.305501	1.38936e-07	7.07528e-06		cg25465938	1	181000000	CACNA1E	chr1:181454974-181455261	0.407901	0.157313	0.250588	1.4954e-12	6.54476e-11		COL24A1|255631	1.20855	-0.431732	7.66461e-15	5.43247e-14		DMRT3|58524	1.67552	-2.27589	3.64e-09	4.08e-08		CLDN9|9080	-1.50599	1.39702	4.41e-09	2.14e-08
cg08123045	1	156467188	MEF2D	chr1:156469617-156471060	0.559609	0.214049	0.34556	1.18165e-14	6.76065e-13		cg08447739	10	124220359	HTRA1	chr10:124220338-124222240	0.467698	0.149741	0.317957	7.88593e-10	1.41366e-07		cg00767642	1	183000000	NMNAT2	chr1:183386000-183387664	0.538318	0.248185	0.290132	7.52166e-07	8.35368e-06		COL29A1|256076	1.17616	-2.64095	7.90449e-05	0.000190198		DNAH2|146754	1.11907	3.36689	9.04e-07	6.21e-06		CLEC17A|388512	-1.32389	-1.56042	3.29e-05	9.14e-05
cg10640435	1	156594688	HAPLN2	chr1:156593657-156595283	0.456459	0.126292	0.330167	6.09237e-13	2.19475e-11		cg09576143	10	124220367	HTRA1	chr10:124220338-124222240	0.463188	0.15927	0.303919	1.51663e-09	2.26326e-07		cg16721191	1	186000000	HMCN1	chr1:185703458-185703662	0.346014	0.0902284	0.255785	6.92771e-07	7.75647e-06		COL2A1|1280	-6.73982	2.68234	4.63671e-31	1.07511e-29		DNAJC5B|85479	2.24648	-0.536096	2.65e-21	3.59e-19		CLEC2A|387836	-1.98234	-2.19891	0.00616027	0.0116054
cg12664038	1	156611194	BCAN	chr1:156611639-156612447	0.476912	0.212446	0.264466	2.84592e-11	6.78018e-10		cg02711929	10	124220396	HTRA1	chr10:124220338-124222240	0.702392	0.40272	0.299672	5.33223e-11	2.18209e-08		cg13496323	1	186000000	HMCN1	chr1:185703458-185703662	0.337875	0.0786377	0.259238	1.91592e-06	1.94245e-05		COL4A6|1288	-1.54397	0.0363618	5.732e-11	2.82626e-10		DNASE1L3|1776	-1.81427	1.67978	1.93e-08	1.87e-07		CLEC2L|154790	-2.31694	-1.27662	1.63e-16	2e-15
cg20285128	1	156646746	NES	chr1:156646292-156647260	0.348368	0.0608802	0.287488	2.07568e-08	2.51767e-07		cg24433738	10	124220634	HTRA1	chr10:124220338-124222240	0.530771	0.257027	0.273745	1.69522e-09	2.45884e-07		cg12124386	1	190000000	FAM5C		0.669538	0.398089	0.27145	1.2182e-11	4.10937e-10		COL5A3|50509	1.05673	4.05984	1.85952e-21	2.18852e-20		DNER|92737	1.51076	-0.540256	9.11e-06	5.01e-05		CLEC3A|10143	-2.14663	-3.1449	5.2e-05	0.00014034
cg02619408	1	156818592	INSRR;NTRK1	chr1:156818622-156819192	0.41155	0.115268	0.296282	2.08618e-12	6.53103e-11		cg25920792	10	124220729	HTRA1	chr10:124220338-124222240	0.39827	0.140328	0.257942	9.46954e-08	5.25684e-06		cg23010538	1	190000000	FAM5C		0.723163	0.467114	0.256049	7.13669e-09	1.23416e-07		COL6A1|1291	1.02922	7.90629	9.40689e-23	1.21264e-21		DNM3|26052	-1.08304	0.699655	1.19e-07	9.79e-07		CLEC3B|7123	-1.75214	2.90926	4.92e-28	2.71e-26
cg04104526	1	156818749	INSRR;NTRK1	chr1:156818622-156819192	0.384037	0.106301	0.277735	2.22663e-15	1.55889e-13		cg10588377	10	124221799	HTRA1	chr10:124220338-124222240	0.521675	0.25134	0.270335	3.23377e-08	2.27772e-06		cg08876441	1	190000000	FAM5C		0.567087	0.290349	0.276739	3.96917e-10	9.14783e-09		COL6A6|131873	2.11552	-2.43694	1.23842e-23	1.71401e-22		DOCK2|1794	1.08465	3.54824	4.89e-09	5.36e-08		CLEC4F|165530	-1.60181	-2.27579	4.98e-09	2.4e-08
cg18534318	1	156829287	INSRR;NTRK1	chr1:156828804-156831102	0.426535	0.130458	0.296077	9.42452e-13	3.21843e-11		cg10155205	10	126137517	NKX1-2	chr10:126135809-126138896	0.598298	0.345618	0.25268	7.74836e-07	2.68068e-05		cg13464924	1	190000000	FAM5C		0.380342	0.120333	0.260009	2.01406e-09	3.94495e-08		COL9A1|1297	-2.82224	2.25018	6.77721e-26	1.10705e-24		DOCK4|9732	1.18511	3.04199	9.06e-16	3.79e-14		CLEC4G|339390	-1.34649	-0.772212	3.16e-05	8.8e-05
cg12995941	1	156829377	INSRR;NTRK1	chr1:156828804-156831102	0.522019	0.192156	0.329863	3.38161e-13	1.30579e-11		cg18833880	10	131650741	EBF3		0.831993	0.542096	0.289896	9.15167e-09	8.71417e-07		cg06805320	1	190000000	FAM5C		0.532784	0.190338	0.342446	2.15968e-12	9.0251e-11		COLEC11|78989	-1.34833	-0.146262	2.08935e-10	9.7372e-10		DOK2|9046	1.38912	2.87076	5.54e-19	4.36e-17		CLEC4GP1|440508	-1.24171	-2.79529	0.00036768	0.0008683
cg03438943	1	156829691	INSRR;NTRK1	chr1:156828804-156831102	0.672391	0.378115	0.294276	4.91805e-14	2.37111e-12		cg10084213	10	134058796	STK32C		0.811349	0.538368	0.272981	1.91488e-10	5.13961e-08		cg24365464	1	190000000	FAM5C		0.558529	0.228151	0.330378	4.94567e-11	1.41397e-09		COLEC12|81035	1.51107	1.816	1.02894e-27	1.91163e-26		DOK3|79930	1.03331	2.72776	9.08e-13	2.16e-11		CLEC4M|10332	-2.27246	-2.66755	7.55e-07	2.67e-06
cg03055346	1	156830080	INSRR;NTRK1	chr1:156828804-156831102	0.316074	0.0440609	0.272013	4.41866e-09	6.28645e-08		cg24659054	10	134600656	NKX6-2	chr10:134597357-134602649	0.530632	0.271014	0.259618	1.18418e-06	3.73835e-05		cg22671471	1	198000000	LHX9	chr1:197880016-197881637	0.565898	0.189346	0.376552	3.2117e-13	1.73946e-11		COMMD7|149951	-1.14146	6.44194	3.81053e-45	2.36227e-43		DOK5|55816	1.23988	-0.576297	1e-10	1.54e-09		CLGN|1047	-1.15018	-0.220946	0.00026776	0.00064538
cg00497172	1	156878518	PEAR1	chr1:156877769-156878649	0.645794	0.367141	0.278653	1.03973e-19	2.43552e-17		cg15304699	10	134600675	NKX6-2	chr10:134597357-134602649	0.52439	0.260639	0.263751	4.41036e-07	1.73199e-05		cg13364881	1	198000000	LHX9	chr1:197880016-197881637	0.548098	0.232772	0.315326	5.82439e-17	1.17833e-14		COX7B2|170712	-2.89867	-3.43746	3.29367e-06	9.5852e-06		DPCR1|135656	4.14191	0.177757	2.23e-17	1.26e-15		CLIP3|25999	-1.47692	4.0437	2.31e-38	7.93e-36
cg01796075	1	156878573	PEAR1	chr1:156877769-156878649	0.737139	0.434874	0.302265	5.63549e-28	9.3376e-25		cg01303723	10	134600680	NKX6-2	chr10:134597357-134602649	0.507033	0.251582	0.255451	4.75354e-07	1.83314e-05		cg16353957	1	198000000	LHX9	chr1:197880016-197881637	0.562177	0.197576	0.364601	2.68958e-15	3.01987e-13		CP|1356	3.13473	2.53681	1.03048e-34	3.06127e-33		DPEP1|1800	-1.08404	6.91474	0.00088532	0.00296592		CLLU1|574028	-1.21236	-1.90361	0.00019016	0.00047052
cg06069154	1	156889826	C1orf92	chr1:156890243-156890806	0.445195	0.167704	0.277491	8.06111e-14	3.65982e-12		cg19701540	10	134600915	NKX6-2	chr10:134597357-134602649	0.525055	0.23677	0.288285	4.01136e-09	4.68699e-07		cg19704348	1	198000000	LHX9	chr1:197880016-197881637	0.370028	0.0535309	0.316497	9.60933e-10	2.02122e-08		CPA2|1358	1.3264	-0.308358	0.000128725	0.000300544		DPEP2|64174	1.2986	0.258662	5.07e-12	1.03e-10		CLLU1OS|574016	-1.16685	-1.67	0.00198405	0.00413281
cg18863922	1	156889882	C1orf92	chr1:156890243-156890806	0.521137	0.207528	0.313609	9.63326e-15	5.66855e-13		cg25485875	10	134600998	NKX6-2	chr10:134597357-134602649	0.668593	0.311489	0.357104	9.44041e-08	5.24266e-06		cg17777738	1	198000000	LHX9	chr1:197880016-197881637	0.421648	0.145907	0.275741	3.02206e-10	7.15391e-09		CPA5|93979	-1.17268	-3.04682	0.0045854	0.00835215		DPF1|8193	1.51721	-0.584146	4.26e-08	3.84e-07		CLPS|1208	2.48714	-3.31514	4.2e-08	1.76e-07
cg11707445	1	156889964	C1orf92	chr1:156890243-156890806	0.862631	0.55501	0.307621	2.85466e-28	5.1049e-25		cg00494919	10	135020822	KNDC1	chr10:135020618-135020932	0.749661	0.368207	0.381454	6.47292e-09	6.6679e-07		cg10897376	1	198000000	LHX9	chr1:197880016-197881637	0.340821	0.0708316	0.26999	1.84743e-08	2.91263e-07		CPA6|57094	-2.56003	1.5629	2.05807e-13	1.27942e-12		DPT|1805	1.26787	1.88396	4.83e-06	2.82e-05		CLSPN|63967	1.19906	3.30784	3.64e-26	1.44e-24
cg06360543	1	156890056	C1orf92	chr1:156890243-156890806	0.582419	0.255362	0.327057	2.08625e-13	8.51323e-12		cg27346806	10	135050758	VENTX	chr10:135048797-135052077	0.693317	0.380723	0.312594	9.24218e-08	5.15404e-06		cg24085809	1	198000000	LHX9	chr1:197880016-197881637	0.396618	0.0611573	0.335461	3.88389e-10	8.97739e-09		CPB1|1360	-3.66985	-1.64863	6.85185e-10	3.03029e-09		DPY19L2P1|554236	1.14345	-3.23711	0.0157579	0.0368402		CLSTN2|64084	-3.26664	1.25731	1.41e-38	5.14e-36
cg26614154	1	156893605	C1orf92	chr1:156893519-156894232	0.617472	0.25613	0.361342	2.63957e-23	1.66121e-20		cg18002909	10	135050779	VENTX	chr10:135048797-135052077	0.677025	0.347688	0.329336	7.54387e-08	4.39595e-06		cg13501359	1	198000000	LHX9	chr1:197880016-197881637	0.281537	0.0268026	0.254735	1.71119e-08	2.71565e-07		CPB2|1361	-1.31849	-3.2652	0.000430488	0.000931064		DPYD|1806	1.44762	3.31247	3.76e-12	7.85e-11		CLU|1191	-1.37357	6.89438	1.71e-10	1e-09
cg24638326	1	156893792	C1orf92	chr1:156893519-156894232	0.563119	0.153616	0.409503	4.9079e-21	1.66401e-18		cg00745555	10	135050896	VENTX	chr10:135048797-135052077	0.589153	0.292675	0.296478	2.47598e-07	1.10967e-05		cg27225220	1	198000000	LHX9	chr1:197880016-197881637	0.553664	0.196035	0.357629	1.08471e-13	6.86492e-12		CPE|1363	-1.53841	4.85739	4.06019e-15	2.9685e-14		DPYSL4|10570	1.38009	-0.822932	2.17e-09	2.54e-08		CLVS2|134829	-2.62272	-3.26764	7.79e-11	4.73e-10
cg06374307	1	156893873	C1orf92	chr1:156893519-156894232	0.47158	0.18201	0.289569	3.13878e-21	1.12948e-18		cg02089629	10	135050933	VENTX	chr10:135048797-135052077	0.582724	0.30155	0.281174	1.08563e-08	9.92199e-07		cg05527530	1	198000000	LHX9	chr1:197880016-197881637	0.494417	0.180686	0.313731	1.38664e-15	1.71446e-13		CPN1|1369	-4.731	0.451677	1.96366e-32	4.98709e-31		DPYSL5|56896	1.91843	-2.64743	6.99e-05	0.00031213		CMA1|1215	-1.83389	-1.49596	4.39e-06	1.39e-05
cg09858604	1	156894231	C1orf92	chr1:156893519-156894232	0.527717	0.25423	0.273488	2.14365e-15	1.50799e-13		cg07370771	10	135050957	VENTX	chr10:135048797-135052077	0.598186	0.273731	0.324456	2.26055e-10	5.70539e-08		cg25212090	1	198000000	LHX9	chr1:197880016-197881637	0.531251	0.232929	0.298322	6.52823e-17	1.28323e-14		CPNE1|8904	-1.58804	8.25293	1.55054e-49	1.23037e-47		DRD1|1812	-1.38452	-1.56745	0.0002176	0.00086011		CMTM5|116173	-2.06381	-3.01634	2.4e-10	1.38e-09
cg20298273	1	156897330	C1orf92	chr1:156897199-156897796	0.645577	0.360392	0.285185	1.87526e-14	1.01903e-12		cg03885037	10	135090098	ADAM8	chr10:135089969-135090491	0.497735	0.178836	0.318899	2.31936e-11	1.25039e-08		cg15544654	1	198000000	LHX9	chr1:197880016-197881637	0.530994	0.221018	0.309977	1.74146e-12	7.48319e-11		CPNE6|9362	-2.16529	-0.236458	1.58873e-10	7.48422e-10		DRD2|1813	-1.10376	-0.216465	0.00302059	0.00880233		CMYA5|202333	-1.05892	0.0455723	1.76e-13	1.48e-12
cg02237987	1	156897441	C1orf92	chr1:156897199-156897796	0.333882	0.0556722	0.27821	5.59924e-10	9.84191e-09		cg16786703	10	135090255	ADAM8	chr10:135089969-135090491	0.56594	0.247784	0.318156	1.02293e-10	3.33705e-08		cg16353006	1	198000000	LHX9	chr1:197880016-197881637	0.657444	0.272177	0.385266	1.53805e-16	2.61782e-14		CPNE9|151835	-1.80288	-0.795815	1.81583e-15	1.36735e-14		DRGX|644168	1.8917	-2.05192	0.00014145	0.00058458		CNDP1|84735	1.72481	-0.833275	2.32e-05	6.61e-05
cg22402053	1	156897540	C1orf92	chr1:156897199-156897796	0.329904	0.050093	0.279811	1.66518e-10	3.31224e-09		cg24382527	10	135090367	ADAM8	chr10:135089969-135090491	0.467954	0.143375	0.324579	7.5546e-09	7.5181e-07		cg02393845	1	198000000	LHX9	chr1:197887088-197887791	0.38503	0.0952606	0.289769	8.00495e-13	3.82542e-11		CPS1|1373	1.28062	2.59904	2.7262e-05	7.00845e-05		DRP2|1821	-2.45301	1.67857	2.41e-18	1.64e-16		CNGA1|1259	-1.42849	1.20894	6.02e-12	4.19e-11
cg22667491	1	157963023	KIRREL	chr1:157963540-157963947	0.417301	0.121778	0.295524	1.34641e-08	1.70747e-07		cg15460093	10	135090381	ADAM8	chr10:135089969-135090491	0.475925	0.141033	0.334892	6.18406e-11	2.39899e-08		cg03660500	1	198000000	LHX9	chr1:197887088-197887791	0.471824	0.097363	0.374461	4.07223e-15	4.27906e-13		CR1|1378	1.65659	0.911291	3.85242e-21	4.40904e-20		DSC3|1825	-1.8968	4.43346	2.88e-06	1.77e-05		CNGA3|1261	-3.39403	0.378449	1.48e-17	2.06e-16
cg01188685	1	157963448	KIRREL	chr1:157963540-157963947	0.341757	0.0714643	0.270292	4.23264e-09	6.0482e-08		cg04246880	10	135150497	CALY	chr10:135148196-135150565	0.415661	0.125804	0.289857	2.09295e-07	9.76631e-06		cg20743365	1	198000000	LHX9	chr1:197887088-197887791	0.58233	0.138717	0.443613	3.88878e-16	5.73844e-14		CR2|1380	1.52012	1.22521	3.75888e-09	1.54243e-08		DSCAM|1826	-1.72781	-3.2366	7.05e-05	0.00031435		CNGB1|1258	-1.59866	-3.02728	7.35e-08	2.97e-07
cg15651099	1	157963695	KIRREL	chr1:157963540-157963947	0.423781	0.123626	0.300155	3.83795e-09	5.53573e-08		cg06766659	10	135150505	CALY	chr10:135148196-135150565	0.466738	0.214477	0.25226	5.12198e-08	3.24895e-06		cg12444328	1	198000000	LHX9	chr1:197887088-197887791	0.633339	0.242109	0.39123	2.66059e-14	2.09025e-12		CRABP1|1381	1.43033	0.566453	1.28446e-05	3.46207e-05		DSCR6|53820	-1.18759	-0.748945	0.00070809	0.00243053		CNGB3|54714	-1.7164	-2.66851	0.00024844	0.00060209
cg12124922	1	158150649	CD1D	chr1:158150620-158151503	0.623582	0.233787	0.389795	1.84943e-12	5.87769e-11		cg03875156	10	135237037	SPRN	chr10:135236687-135238237	0.454419	0.203942	0.250476	1.21588e-06	3.82032e-05		cg20329405	1	198000000	LHX9	chr1:197887088-197887791	0.526593	0.239112	0.287481	9.30519e-12	3.23954e-10		CRB2|286204	-1.73462	2.60255	1.24222e-20	1.3682e-19		DSG4|147409	-1.5606	-0.127382	2.26e-13	5.99e-12		CNIH3|149111	-1.42236	2.05697	2.77e-22	6.91e-21
cg13844591	1	158150675	CD1D	chr1:158150620-158151503	0.59864	0.31009	0.28855	4.13401e-11	9.4771e-10		cg19899694	10	135237140	SPRN	chr10:135236687-135238237	0.502272	0.216256	0.286016	4.82014e-09	5.37503e-07		cg12417362	1	202000000	NAV1	chr1:201617041-201619788	0.559129	0.298442	0.260687	1.14992e-12	5.22372e-11		CREB3L1|90993	1.82206	6.69602	5.99581e-38	2.18915e-36		DTHD1|401124	1.44307	-2.17861	1.9e-07	1.51e-06		CNKSR2|22866	-2.03564	-2.64773	2.73e-13	2.24e-12
cg04360049	1	158150797	CD1D	chr1:158150620-158151503	0.545494	0.249511	0.295983	1.81436e-10	3.57792e-09		cg00249511	11	627152	SCT	chr11:626728-628037	0.638648	0.340487	0.298161	3.17918e-06	8.15585e-05		cg13071729	1	202000000	NAV1	chr1:201617041-201619788	0.454039	0.153265	0.300774	1.08062e-12	4.95885e-11		CREB3L3|84699	-1.03999	0.912742	9.51204e-05	0.000226286		DTNA|1837	-1.4961	1.3113	7.7e-08	6.63e-07		CNN1|1264	-2.46153	6.59172	1.61e-28	9.37e-27
cg25683325	1	158151058	CD1D	chr1:158150620-158151503	0.602349	0.306996	0.295352	2.30169e-12	7.12357e-11		cg25774643	11	627175	SCT	chr11:626728-628037	0.667156	0.399015	0.268141	2.96921e-05	0.000471978		cg14834267	1	202000000	NAV1	chr1:201617041-201619788	0.414676	0.0621849	0.352491	2.45777e-12	1.01137e-10		CREG2|200407	2.71356	-1.19657	4.73432e-25	7.33101e-24		DUOX1|53905	-1.07673	2.9519	1.33e-05	7.05e-05		CNNM1|26507	-1.36226	-0.129474	1.44e-07	5.61e-07
cg05768141	1	160039847	KCNJ10	chr1:160040128-160040668	0.516552	0.112381	0.404171	4.87336e-14	2.35421e-12		cg17005319	11	655579	DEAF1		0.493772	0.234405	0.259367	7.38718e-06	0.000158571		cg16517702	1	202000000	NAV1	chr1:201617041-201619788	0.442135	0.07094	0.371195	1.27941e-12	5.72506e-11		CRHR2|1395	-1.69598	-2.80893	1.1668e-07	4.06481e-07		DUOX2|50506	-1.79428	8.07852	2.18e-07	1.7e-06		CNPY1|285888	-1.38335	-3.37597	0.0044801	0.00871581
cg04975598	1	160039909	KCNJ10	chr1:160040128-160040668	0.347544	0.0288934	0.318651	1.24368e-10	2.54547e-09		cg09631059	11	856942	TSPAN4	chr11:858575-858932	0.603277	0.323988	0.279289	1.32025e-11	8.50985e-09		cg05695937	1	202000000	NAV1	chr1:201617041-201619788	0.55091	0.192978	0.357932	3.24094e-13	1.75238e-11		CRIP1|1396	1.34152	6.54896	7.89591e-14	5.12445e-13		DUOXA1|90527	-1.33801	0.52315	4.55e-07	3.32e-06		CNR1|1268	-2.17272	0.0420946	1.66e-16	2.03e-15
cg12163730	1	160039962	KCNJ10	chr1:160040128-160040668	0.350681	0.0560779	0.294603	2.30958e-09	3.51301e-08		cg17547742	11	985589	AP2A2		0.725437	0.438166	0.287271	4.63392e-07	1.79831e-05		cg09358973	1	202000000	NAV1	chr1:201617041-201619788	0.567338	0.264224	0.303114	4.55008e-13	2.34481e-11		CRLF1|9244	1.28068	-0.82081	1.05698e-09	4.57377e-09		DUOXA2|405753	-2.15444	6.25638	1.54e-08	1.52e-07		CNR2|1269	-1.02494	-1.80334	0.00010963	0.00028191
cg25312122	1	160184732	PEA15		0.683074	0.322479	0.360595	2.00573e-17	2.47142e-15		cg18539086	11	1432030	BRSK2	chr11:1430939-1431834	0.679725	0.413113	0.266612	1.01405e-09	1.67822e-07		cg14920846	1	202000000	NAV1	chr1:201617041-201619788	0.620514	0.368266	0.252249	2.44954e-13	1.37755e-11		CRP|1401	-4.20158	-1.90064	3.67251e-10	1.67268e-09		DUSP27|92235	-1.93456	5.98253	0.00027639	0.00105876		CNRIP1|25927	-1.07101	2.67979	4.87e-25	1.7e-23
cg11659961	1	160369972	VANGL2	chr1:160370112-160370658	0.404622	0.0795586	0.325064	6.955e-11	1.50991e-09		cg10002860	11	1482176	BRSK2	chr11:1481778-1482644	0.74053	0.420834	0.319696	4.84934e-09	5.39527e-07		cg19827875	1	202000000	NAV1	chr1:201617041-201619788	0.822653	0.565343	0.25731	1.52526e-16	2.60374e-14		CRTAM|56253	2.61896	-0.732061	8.53584e-53	8.41983e-51		DUSP5P|574029	1.72862	-0.805729	5.18e-11	8.46e-10		CNTD2|79935	1.60146	2.63125	1.24e-14	1.2e-13
cg13428480	1	160370208	VANGL2	chr1:160370112-160370658	0.49909	0.041128	0.457962	1.49227e-14	8.33134e-13		cg13133304	11	1862020	TNNI2		0.765241	0.491948	0.273293	5.04688e-08	3.21348e-06		cg03046819	1	202000000	SHISA4		0.478419	0.221082	0.257337	6.78903e-10	1.48232e-08		CRYBA2|1412	3.28026	-0.843281	9.63387e-40	3.88269e-38		DYDC2|84332	-1.55424	-2.19391	0.00421382	0.0117943		CNTN1|1272	-2.63986	0.473997	8.95e-22	2.08e-20
cg24588482	1	160370253	VANGL2	chr1:160370112-160370658	0.511557	0.0403168	0.47124	4.04128e-13	1.52615e-11		cg13167664	11	2158987	IGF2;INS-IGF2	chr11:2158951-2162484	0.450072	0.172344	0.277728	1.38923e-07	7.07528e-06		cg12730843	1	202000000	LMOD1		0.442402	0.184513	0.257888	8.46577e-13	4.0201e-11		CRYBA4|1413	1.68492	-1.93566	1.43995e-11	7.47785e-11		DYSFIP1|116729	1.05687	-3.21681	0.0011928	0.00387196		CNTN2|6900	-2.73163	-1.20905	3.06e-17	4.09e-16
cg07346851	1	160370286	VANGL2	chr1:160370112-160370658	0.346351	0.0283228	0.318028	2.14551e-09	3.29145e-08		cg16977706	11	2160129	IGF2;INS-IGF2	chr11:2158951-2162484	0.468345	0.21235	0.255995	1.83013e-07	8.80756e-06		cg16966962	1	202000000	LMOD1		0.465109	0.122924	0.342185	8.13468e-14	5.37806e-12		CSF1|1435	1.11833	3.59689	9.11369e-37	3.07011e-35		DZIP1L|199221	1.64844	0.559338	1.03e-19	9.78e-18		CNTN3|5067	-2.05173	0.11668	7.29e-12	5.01e-11
cg18398058	1	160370363	VANGL2	chr1:160370112-160370658	0.35267	0.035765	0.316905	2.51712e-10	4.80512e-09		cg18087943	11	2160540	IGF2;IGF2AS;INS-IGF2	chr11:2158951-2162484	0.489766	0.168679	0.321087	2.47606e-07	1.10967e-05		cg02970525	1	202000000	LMOD1		0.565568	0.157685	0.407883	1.05631e-17	2.91157e-15		CSF1R|1436	1.1306	4.70812	4.50651e-20	4.80067e-19		EBF2|64641	1.19497	-2.45615	1.24e-06	8.21e-06		CNTN4|152330	-1.71765	1.68798	5.99e-27	2.75e-25
cg22535359	1	160370370	VANGL2	chr1:160370112-160370658	0.342593	0.0338615	0.308731	7.08976e-11	1.53667e-09		cg14608156	11	2160554	IGF2;IGF2AS;INS-IGF2	chr11:2158951-2162484	0.526556	0.158153	0.368403	1.67739e-08	1.37528e-06		cg10327424	1	203000000	SYT2	chr1:202611668-202613039	0.443097	0.120478	0.322619	6.30819e-12	2.3042e-10		CSF2|1437	1.27932	-0.43923	4.54083e-08	1.66029e-07		ECEL1|9427	1.30726	-0.661869	0.00033949	0.00127204		CNTN5|53942	-2.52737	-2.9557	6.54e-06	2.03e-05
cg08004976	1	160370427	VANGL2	chr1:160370112-160370658	0.350585	0.0638552	0.28673	5.51152e-10	9.70575e-09		cg12773325	11	2160560	IGF2;IGF2AS;INS-IGF2	chr11:2158951-2162484	0.543925	0.173146	0.370779	2.82204e-08	2.05028e-06		cg15586779	1	203000000	SYT2	chr1:202611668-202613039	0.380023	0.111205	0.268818	5.14758e-09	9.20189e-08		CSF2RB|1439	1.19222	3.38251	3.75645e-18	3.51508e-17		ECM2|1842	1.12272	1.12927	7.22e-12	1.42e-10		CNTN6|27255	-1.42744	-3.41547	6.79e-06	2.1e-05
cg07195126	1	160370843	VANGL2	chr1:160370112-160370658	0.439293	0.0886349	0.350658	7.03303e-10	1.20607e-08		cg12614029	11	2160564	IGF2;IGF2AS;INS-IGF2	chr11:2158951-2162484	0.548378	0.186831	0.361547	4.11045e-08	2.73728e-06		cg16899351	1	203000000	SYT2	chr1:202678881-202679769	0.609627	0.284612	0.325015	1.06234e-16	1.92915e-14		CSF3R|1441	1.67924	2.89995	7.44502e-25	1.13707e-23		EDA2R|60401	-1.15758	0.378792	2.57e-06	1.59e-05		CNTNAP1|8506	-1.30334	3.87659	3.51e-20	6.64e-19
cg02957185	1	161068781	KLHDC9	chr1:161068062-161068801	0.649558	0.355378	0.294181	1.61976e-13	6.81739e-12		cg10501065	11	2164976	IGF2;IGF2AS;INS-IGF2	chr11:2165135-2165672	0.442565	0.174869	0.267696	5.85554e-08	3.60623e-06		cg12773604	1	203000000	SYT2	chr1:202678881-202679769	0.399316	0.148919	0.250397	1.31938e-10	3.3998e-09		CSMD3|114788	1.44215	-2.81429	5.75517e-06	1.62275e-05		EDN1|1906	-1.18815	4.11481	9.2e-11	1.43e-09		CNTNAP4|85445	-2.61879	-3.31247	1.11e-07	4.37e-07
cg10775792	1	161228455	PCP4L1	chr1:161228477-161229028	0.488646	0.210451	0.278195	3.38586e-14	1.70969e-12		cg01530101	11	2891098	KCNQ1DN	chr11:2890388-2891337	0.620687	0.351274	0.269413	1.30578e-07	6.76356e-06		cg23278267	1	203000000	SYT2	chr1:202678881-202679769	0.372523	0.102994	0.269529	2.96455e-08	4.47469e-07		CSPG5|10675	1.29403	0.197388	5.97086e-16	4.68176e-15		EFCAB5|374786	-1.34778	-1.56089	1.39e-09	1.7e-08		CNTNAP5|129684	-2.91401	-3.05161	1.39e-09	7.2e-09
cg27223727	1	161228496	PCP4L1	chr1:161228477-161229028	0.524793	0.175543	0.34925	3.22277e-11	7.57644e-10		cg11744767	11	2907672	CDKN1C	chr11:2907308-2907675	0.53438	0.165306	0.369074	1.07157e-13	3.99391e-10		cg05127456	1	203000000	SYT2	chr1:202678881-202679769	0.544114	0.193058	0.351056	8.87671e-24	3.67156e-20		CST1|1469	-1.54314	5.66702	1.66864e-07	5.69634e-07		EGFL6|25975	1.2279	1.76122	1.22e-10	1.83e-09		COL10A1|1300	-1.63583	5.86996	2.49e-16	2.99e-15
cg11912330	1	161228674	PCP4L1	chr1:161228477-161229028	0.609717	0.237204	0.372513	4.40669e-17	4.94406e-15		cg05559445	11	2907674	CDKN1C	chr11:2907308-2907675	0.630261	0.284815	0.345446	4.15636e-14	2.06604e-10		cg22594309	1	203000000	SYT2	chr1:202678881-202679769	0.523942	0.195249	0.328692	5.90425e-19	2.7355e-16		CST2|1470	-1.44216	1.78751	7.20375e-06	2.00617e-05		EHD2|30846	1.13559	5.25239	6.95e-20	6.79e-18		COL11A1|1301	-1.32144	6.36238	3.65e-11	2.3e-10
cg14210287	1	161695659	FCRLB	chr1:161695637-161697298	0.660919	0.188794	0.472125	2.5955e-19	5.49998e-17		cg21012362	11	6677087	DCHS1	chr11:6676496-6677096	0.439562	0.145146	0.294416	1.07138e-06	3.45854e-05		cg05752786	1	203000000	SYT2	chr1:202678881-202679769	0.514704	0.205989	0.308715	5.46198e-17	1.1194e-14		CST4|1472	-1.81423	2.35833	6.78653e-08	2.42532e-07		ELAVL4|1996	1.45273	-2.44858	3.83e-06	2.29e-05		COL12A1|1303	-1.18289	8.55112	6.18e-17	8.01e-16
cg18450905	1	161695678	FCRLB	chr1:161695637-161697298	0.509122	0.184853	0.324269	2.35944e-18	3.83574e-16		cg03666741	11	9025298	NRIP3	chr11:9025095-9026315	0.469697	0.157651	0.312046	2.58339e-08	1.92449e-06		cg16315376	1	203000000	SYT2	chr1:202678881-202679769	0.575252	0.298819	0.276433	2.1311e-15	2.48608e-13		CST5|1473	-1.80432	-2.7006	1.11985e-06	3.45494e-06		ELF5|2001	-2.58279	-0.0647808	3.72e-06	2.23e-05		COL14A1|7373	-1.87978	6.02534	3.76e-27	1.78e-25
cg26009555	1	161695839	FCRLB	chr1:161695637-161697298	0.480416	0.117002	0.363414	2.99317e-16	2.66492e-14		cg01547141	11	9113152	SCUBE2	chr11:9112461-9113459	0.397002	0.137272	0.25973	2.77832e-09	3.55194e-07		cg23959605	1	203000000	SYT2	chr1:202678881-202679769	0.564683	0.296449	0.268235	5.66306e-16	7.88622e-14		CSTL1|128817	-1.27576	-2.62368	1.59134e-05	4.22858e-05		ELFN2|114794	1.24225	0.679485	0.00078718	0.0026734		COL16A1|1307	-1.25337	6.05056	5.08e-18	7.42e-17
cg21864996	1	161695961	FCRLB	chr1:161695637-161697298	0.326964	0.0691366	0.257828	1.19197e-09	1.94273e-08		cg10782380	11	9113167	SCUBE2	chr11:9112461-9113459	0.530246	0.157226	0.37302	7.83645e-10	1.40651e-07		cg08925398	1	203000000	CYB5R1	chr1:202936045-202936252	0.342047	0.0537801	0.288267	3.84688e-10	8.89815e-09		CT45A1|541466	-7.03849	-0.163828	1.96297e-12	1.11508e-11		ELMOD1|55531	1.5715	-2.94679	7.48e-09	7.87e-08		COL19A1|1310	-1.70983	-2.41068	3.08e-08	1.32e-07
cg01194901	1	161697083	FCRLB	chr1:161695637-161697298	0.387518	0.090535	0.296983	6.23633e-11	1.36868e-09		cg02783889	11	9113370	SCUBE2	chr11:9112461-9113459	0.437721	0.147651	0.29007	3.50563e-09	4.23268e-07		cg18275051	1	203000000	CYB5R1	chr1:202936045-202936252	0.534011	0.189678	0.344332	7.24485e-16	9.79594e-14		CT45A2|728911	-6.35922	-1.69678	7.72904e-13	4.54976e-12		ELOVL3|83401	2.69044	-0.931511	1.44e-24	4.35e-22		COL1A1|1277	-1.16906	12.3368	1.8e-15	1.97e-14
cg22389730	1	161697241	FCRLB	chr1:161695637-161697298	0.5046	0.0887916	0.415809	1.13811e-12	3.81113e-11		cg10376408	11	9113406	SCUBE2	chr11:9112461-9113459	0.657516	0.234654	0.422862	3.6547e-11	1.70674e-08		cg01798157	1	203000000	BTG2	chr1:203274305-203275338	0.685513	0.316646	0.368868	9.33777e-17	1.74097e-14		CT45A3|441519	-7.15395	-0.994628	2.90996e-13	1.78537e-12		ELOVL4|6785	1.15166	-0.811833	2.05e-07	1.61e-06		COL1A2|1278	-1.26439	11.6039	1.59e-20	3.16e-19
cg17905084	1	161697281	FCRLB	chr1:161695637-161697298	0.394225	0.0654513	0.328773	8.13709e-12	2.20047e-10		cg19237879	11	9113458	SCUBE2	chr11:9112461-9113459	0.651983	0.360911	0.291072	9.4297e-11	3.15342e-08		cg04148762	1	204000000	ATP2B4	chr1:203598471-203598853	0.472839	0.100282	0.372557	3.14542e-17	7.0742e-15		CT45A4|441520	-6.94097	-1.12013	6.31424e-13	3.75406e-12		EMID1|129080	-1.00252	2.56951	1.69e-07	1.35e-06		COL21A1|81578	-1.48156	0.0962285	2.09e-13	1.73e-12
cg17084863	1	162530364	UAP1	chr1:162530856-162531853	0.767137	0.3976	0.369538	2.02826e-19	4.41932e-17		cg11124915	11	10828419	EIF4G2	chr11:10829361-10831121	0.645553	0.380283	0.26527	1.73377e-08	1.41164e-06		cg17721249	1	204000000	ATP2B4	chr1:203598471-203598853	0.513003	0.102359	0.410644	1.14652e-14	1.02922e-12		CT45A5|441521	-6.48102	-1.23044	2.43794e-12	1.37179e-11		EMID2|136227	1.02931	-2.49656	0.00016411	0.00066751		COL22A1|169044	-1.71649	1.51093	1.22e-14	1.18e-13
cg22605643	1	163039012	RGS4		0.419136	0.162563	0.256574	2.08632e-07	1.98658e-06		cg14249564	11	12340382	MICALCL		0.681195	0.416109	0.265085	3.12408e-13	7.10246e-10		cg26253438	1	204000000	ATP2B4	chr1:203598471-203598853	0.492707	0.131544	0.361163	4.8807e-19	2.33888e-16		CT45A6|541465	-6.73298	-1.323	9.04951e-13	5.29564e-12		EMP3|2014	1.24755	4.28556	6.85e-18	4.3e-16		COL24A1|255631	-1.09792	1.09297	1.53e-09	7.84e-09
cg03892631	1	163039184	RGS4		0.444703	0.132951	0.311752	3.08116e-09	4.54543e-08		cg27240158	11	12698019	TEAD1	chr11:12695414-12696981	0.529181	0.278632	0.250549	9.69296e-06	0.00019632		cg15732851	1	204000000	ATP2B4	chr1:203598471-203598853	0.701601	0.160583	0.541018	1.24014e-19	7.5457e-17		CTAG1B|1485	-3.30857	-1.7414	4.41849e-07	1.43068e-06		EMR1|2015	1.42238	0.0353841	4.45e-07	3.25e-06		COL25A1|84570	-1.76269	-2.58535	1.17e-09	6.13e-09
cg12629991	1	164627790	PBX1		0.620061	0.343127	0.276934	2.72607e-14	1.41403e-12		cg18555698	11	12699172	TEAD1	chr11:12695414-12696981	0.686424	0.378343	0.308081	5.03664e-08	3.20766e-06		cg21397588	1	204000000	ATP2B4	chr1:203598471-203598853	0.505973	0.145071	0.360902	2.46846e-17	5.76844e-15		CTAG2|30848	-4.08456	-0.538089	1.36406e-07	4.71245e-07		EMR3|84658	1.15211	-0.947931	0.00033449	0.00125619		COL2A1|1280	-6.17007	1.96655	1.06e-27	5.44e-26
cg09168939	1	164652019	PBX1		0.820736	0.401967	0.418769	1.83139e-18	3.07092e-16		cg08756205	11	12703573	TEAD1		0.727983	0.460784	0.267199	9.9151e-13	1.57305e-09		cg02457623	1	204000000	ATP2B4	chr1:203598471-203598853	0.429813	0.102236	0.327577	5.93203e-15	5.89983e-13		CTHRC1|115908	1.17835	4.53657	8.23762e-19	8.04125e-18		EMR4P|326342	1.01134	-1.53676	0.00023739	0.00092719		COL3A1|1281	-1.25602	11.7177	4.57e-19	7.62e-18
cg23049291	1	165204745	LMX1A	chr1:165204501-165205507	0.530894	0.152922	0.377972	2.49469e-20	7.07576e-18		cg15603424	11	13300592	ARNTL	chr11:13298796-13300735	0.557669	0.290523	0.267146	5.25475e-06	0.000120984		cg04913057	1	204000000	ETNK2	chr1:204120398-204121109	0.476804	0.068902	0.407902	1.63617e-17	4.14487e-15		CTLA4|1493	1.46983	0.990573	5.40261e-33	1.43753e-31		EMX1|2016	1.77884	1.02306	2.92e-06	1.78e-05		COL4A3|1285	-1.17453	-0.566113	0.00014885	0.00037395
cg00174428	1	165204791	LMX1A	chr1:165204501-165205507	0.538115	0.166048	0.372067	6.98238e-19	1.31689e-16		cg09188980	11	14993378	CALCA	chr11:14993452-14993661	0.563667	0.279954	0.283713	1.54669e-10	4.44712e-08		cg17042926	1	205000000	NFASC	chr1:204797610-204797930	0.423006	0.0810417	0.341965	1.30128e-15	1.62952e-13		CTNNA2|1496	-2.61896	1.99006	6.16911e-08	2.21929e-07		ENO2|2026	1.18337	5.51277	2.2e-15	8.75e-14		COL5A1|1289	-1.0992	8.82483	1.88e-16	2.28e-15
cg19317413	1	165204985	LMX1A	chr1:165204501-165205507	0.369197	0.05864	0.310557	7.06871e-13	2.4998e-11		cg09068492	11	14993658	CALCA	chr11:14993452-14993661	0.600376	0.283465	0.316911	5.63202e-10	1.10106e-07		cg24085946	1	205000000	NFASC	chr1:204797610-204797930	0.506663	0.169116	0.337547	5.57121e-17	1.13702e-14		CTNNA3|29119	2.49325	-3.17331	2.94638e-19	2.9737e-18		ENPP3|5169	-2.62941	3.32639	9.27e-13	2.2e-11		COL5A2|1290	-1.13558	8.34976	1.07e-16	1.35e-15
cg15713630	1	165205003	LMX1A	chr1:165204501-165205507	0.358395	0.0843667	0.274029	6.62121e-13	2.35975e-11		cg22183706	11	14993818	CALCA	chr11:14995128-14995908	0.54986	0.226833	0.323027	5.62037e-10	1.10106e-07		cg22571530	1	205000000	NFASC	chr1:204797610-204797930	0.510294	0.202136	0.308157	1.34953e-17	3.54646e-15		CTRB1|1504	-2.49533	-3.01095	0.000598343	0.00126215		ENPP7|339221	2.61595	-2.78283	4.52e-10	6.03e-09		COL6A2|1292	-1.09433	9.54653	5.12e-17	6.71e-16
cg27590049	1	165205199	LMX1A	chr1:165204501-165205507	0.563037	0.143222	0.419815	5.51479e-15	3.46997e-13		cg25943588	11	14993913	CALCA	chr11:14995128-14995908	0.529146	0.21091	0.318236	1.23052e-13	4.35012e-10		cg26418147	1	206000000	RAB7L1	chr1:205743900-205744668	0.468714	0.211925	0.256789	2.88715e-12	1.16598e-10		CTRB2|440387	-2.80866	-2.6438	4.53977e-05	0.000113124		ENTHD1|150350	1.64806	-2.33241	3.6e-07	2.68e-06		COL6A3|1293	-1.16928	9.73238	1.19e-16	1.48e-15
cg06872705	1	165205201	LMX1A	chr1:165204501-165205507	0.565972	0.148941	0.41703	1.19029e-15	9.07656e-14		cg02077276	11	14993977	CALCA	chr11:14995128-14995908	0.603444	0.267648	0.335797	8.71765e-16	1.96667e-11		cg16032102	1	207000000	RASSF5	chr1:206680236-206681444	0.429931	0.16884	0.261091	1.57357e-08	2.5185e-07		CTSE|1510	3.67982	5.59452	4.90154e-45	3.00729e-43		ENTPD5|957	-1.07718	4.20331	3.4e-14	1.08e-12		COL8A1|1295	-1.66999	5.05726	7.13e-25	2.43e-23
cg23689712	1	165205314	LMX1A	chr1:165204501-165205507	0.506021	0.178157	0.327864	1.45922e-26	1.79813e-23		cg25372278	11	15095978	CALCB	chr11:15094957-15095872	0.492791	0.218704	0.274088	1.39378e-07	7.08793e-06		cg04439623	1	208000000	CR2	chr1:207627531-207628280	0.336533	0.0421957	0.294337	4.05165e-08	5.95465e-07		CTSG|1511	1.06604	-0.868669	2.27165e-05	5.90107e-05		EPHA8|2046	-3.50623	-1.06512	8.91e-08	7.53e-07		COL8A2|1296	-1.67186	4.26563	1.35e-28	8.01e-27
cg05099491	1	165205352	LMX1A	chr1:165204501-165205507	0.46001	0.128005	0.332005	1.05139e-15	8.1187e-14		cg00455372	11	17756750	KCNC1	chr11:17756056-17758286	0.427261	0.117019	0.310242	1.97246e-09	2.76914e-07		cg10993336	1	208000000	CR2	chr1:207627531-207628280	0.481144	0.122972	0.358172	9.04891e-13	4.26113e-11		CTSL1|1514	1.46201	5.77564	1.3996e-62	2.63036e-60		EPHB6|2051	4.25547	4.00178	1.56e-25	6.18e-23		COL9A1|1297	-3.02069	2.31827	2.25e-19	3.92e-18
cg16967640	1	165205453	LMX1A	chr1:165204501-165205507	0.455583	0.10859	0.346993	2.51274e-12	7.71086e-11		cg06763078	11	17756761	KCNC1	chr11:17756056-17758286	0.439472	0.132144	0.307328	2.9841e-09	3.75192e-07		cg05831823	1	208000000	CR2	chr1:207627531-207628280	0.431593	0.0987729	0.33282	2.56619e-11	7.9447e-10		CTSL2|1515	-1.48678	4.29525	2.69559e-23	3.64323e-22		EPHX3|79852	-1.14444	0.0946341	8.35e-05	0.00036479		COL9A2|1298	1.28083	4.01586	1.08e-11	7.27e-11
cg16524049	1	165205506	LMX1A	chr1:165204501-165205507	0.687874	0.257308	0.430566	1.86881e-17	2.32334e-15		cg02546690	11	17834480	SERGEF		0.659436	0.351476	0.30796	1.36216e-11	8.66571e-09		cg06531007	1	208000000	CR2	chr1:207627531-207628280	0.396761	0.0873008	0.30946	1.56393e-10	3.95467e-09		CTSW|1521	2.4074	1.56546	7.48654e-51	6.46595e-49		EPM2AIP1|9852	-1.24924	3.90381	1.18e-11	2.2e-10		COLEC10|10584	-2.23704	-1.1978	6.48e-10	3.49e-09
cg05127450	1	165321224	LMX1A	chr1:165321703-165322318	0.515026	0.188576	0.32645	3.32866e-14	1.684e-12		cg02743650	11	18727552	IGSF22	chr11:18727320-18727727	0.516299	0.19489	0.32141	3.84929e-09	4.54288e-07		cg00247489	1	208000000	CR2	chr1:207627531-207628280	0.335199	0.0517445	0.283455	8.56086e-09	1.45488e-07		CTTNBP2|83992	-2.95981	3.74207	1.12897e-45	7.30311e-44		EPSTI1|94240	1.25487	5.40679	3.64e-14	1.13e-12		COLEC11|78989	-2.11592	0.403776	8.11e-19	1.3e-17
cg26337312	1	165321741	LMX1A	chr1:165321703-165322318	0.372272	0.0808435	0.291428	4.24607e-11	9.70744e-10		cg24480695	11	18727628	IGSF22	chr11:18727320-18727727	0.569729	0.314473	0.255257	1.53987e-06	4.60683e-05		cg22197787	1	211000000	KCNH1	chr1:211306667-211307675	0.369617	0.10966	0.259958	8.75828e-12	3.07542e-10		CTXN1|404217	1.99499	2.00574	2.08467e-28	4.05444e-27		EPYC|1833	3.44914	-0.123832	2.92e-15	1.12e-13		COLEC12|81035	-1.15088	3.6043	2.31e-11	1.5e-10
cg07135032	1	165322099	LMX1A	chr1:165321703-165322318	0.496974	0.122354	0.37462	1.69003e-14	9.29569e-13		cg12670477	11	18727774	IGSF22	chr11:18727320-18727727	0.494192	0.198347	0.295845	2.54526e-08	1.90473e-06		cg23086161	1	211000000	KCNH1	chr1:211306667-211307675	0.58351	0.218741	0.364769	1.66308e-20	1.56328e-17		CWH43|80157	-1.91748	1.36198	5.42611e-07	1.74084e-06		ERMN|57471	1.10395	-0.148978	3.36e-08	3.11e-07		COMP|1311	-2.15947	5.73968	4.04e-15	4.19e-14
cg27440715	1	165325169	LMX1A	chr1:165324191-165326328	0.497345	0.235085	0.26226	1.72267e-17	2.16275e-15		cg23614979	11	19734932	LOC100126784;NAV2	chr11:19733936-19735320	0.416573	0.143363	0.27321	3.62611e-11	1.70144e-08		cg02752882	1	211000000	KCNH1	chr1:211306667-211307675	0.558722	0.213911	0.344811	5.47162e-17	1.1206e-14		CX3CL1|6376	1.91175	4.99843	2.80004e-43	1.48344e-41		ERP27|121506	-1.57321	1.649	2.08e-08	2e-07		COPZ2|51226	-1.20684	2.95198	4.93e-24	1.54e-22
cg09248345	1	165325553	LMX1A	chr1:165324191-165326328	0.440765	0.0649635	0.375801	6.89626e-13	2.44323e-11		cg25607321	11	19734989	LOC100126784;NAV2	chr11:19733936-19735320	0.419873	0.144933	0.27494	1.36996e-11	8.67765e-09		cg09084829	1	211000000	KCNH1	chr1:211306667-211307675	0.555953	0.177644	0.378309	1.9475e-17	4.78755e-15		CXCL10|3627	2.76287	4.92281	8.62322e-62	1.53959e-59		ESRRB|2103	1.59268	-3.08118	6.67e-05	0.00029904		CORIN|10699	-1.72308	2.05201	6.33e-22	1.49e-20
cg04351049	1	165325673	LMX1A	chr1:165324191-165326328	0.441683	0.0647201	0.376963	9.42307e-16	7.37934e-14		cg03919694	11	19735068	LOC100126784;NAV2	chr11:19733936-19735320	0.508983	0.161669	0.347314	2.27075e-14	1.41417e-10		cg06582752	1	211000000	KCNH1	chr1:211306667-211307675	0.462763	0.0785875	0.384175	2.27009e-13	1.29124e-11		CXCL11|6373	2.43972	4.15562	5.55543e-36	1.80012e-34		ESRRG|2104	-1.29985	-0.286093	4.04e-05	0.00019079		CORT|1325	1.03538	-1.29309	2.01e-10	1.16e-09
cg09069138	1	165325833	LMX1A	chr1:165324191-165326328	0.532237	0.163884	0.368353	1.30002e-19	2.97166e-17		cg14777561	11	20180336	DBX1	chr11:20181200-20182325	0.518864	0.216626	0.302238	8.79917e-07	2.96313e-05		cg00505979	1	213000000	BATF3	chr1:212872460-212874048	0.557367	0.174856	0.382511	1.76187e-16	2.93421e-14		CXCL13|10563	2.76004	2.62033	3.95338e-46	2.63372e-44		ETV5|2119	1.40807	4.91157	1.05e-20	1.26e-18		COX4I2|84701	-1.25357	-0.205563	1.89e-15	2.06e-14
cg16596102	1	166134346	FAM78B	chr1:166134258-166136448	0.373167	0.0580877	0.315079	5.80393e-12	1.62342e-10		cg22216413	11	26353618	ANO3	chr11:26353537-26353812	0.578585	0.309123	0.269462	7.46514e-07	2.60513e-05		cg16410706	1	213000000	BATF3	chr1:212872460-212874048	0.470163	0.12665	0.343513	4.86325e-13	2.48203e-11		CXCL14|9547	-2.95346	7.65069	2.61914e-40	1.09513e-38		ETV7|51513	1.3267	4.344	6.18e-19	4.8e-17		COX7A1|1346	-1.39856	2.47202	1.1e-26	4.78e-25
cg09279615	1	166134410	FAM78B	chr1:166134258-166136448	0.449897	0.0889564	0.360941	1.40576e-10	2.84426e-09		cg15313332	11	27721270	BDNF	chr11:27721661-27722639	0.561147	0.262383	0.298764	7.07216e-07	2.4968e-05		cg09952946	1	213000000	BATF3	chr1:212872460-212874048	0.420637	0.134969	0.285669	2.16074e-11	6.8205e-10		CXCL17|284340	2.51032	0.404265	1.0419e-14	7.32945e-14		EVC|2121	1.10103	2.19943	9.86e-11	1.52e-09		COX7B2|170712	-5.14529	-2.58685	4.04e-10	2.24e-09
cg07198881	1	166134513	FAM78B	chr1:166134258-166136448	0.533665	0.26052	0.273145	6.78273e-11	1.4759e-09		cg26057780	11	27721277	BDNF	chr11:27721661-27722639	0.568469	0.253751	0.314718	1.46147e-07	7.36195e-06		cg06150468	1	213000000	BATF3	chr1:212872460-212874048	0.362492	0.0963911	0.266101	7.08891e-11	1.94572e-09		CXCL5|6374	1.68585	5.12541	1.56236e-09	6.66375e-09		EVI2A|2123	1.1017	2.51466	3.39e-09	3.81e-08		CPA1|1357	1.71269	-2.96864	0.00057925	0.00132476
cg02229993	1	166134699	FAM78B	chr1:166134258-166136448	0.491516	0.130105	0.361412	1.20505e-10	2.47454e-09		cg10558494	11	27721280	BDNF	chr11:27721661-27722639	0.528777	0.260348	0.268429	3.34246e-07	1.39798e-05		cg26072906	1	213000000	BATF3	chr1:212872460-212874048	0.473951	0.150682	0.323269	1.72767e-10	4.32472e-09		CXCL9|4283	2.47445	5.30319	3.18079e-47	2.24466e-45		EVX1|2128	-2.35434	0.952591	8.1e-10	1.04e-08		CPA2|1358	1.67579	-0.312166	7.53e-06	2.32e-05
cg16403669	1	166135267	FAM78B	chr1:166134258-166136448	0.433012	0.159292	0.273721	4.52677e-12	1.30233e-10		cg22891988	11	30607959	MPPED2	chr11:30606004-30608128	0.615833	0.338414	0.277419	1.22092e-08	1.08604e-06		cg04907523	1	213000000	VASH2	chr1:213123647-213125092	0.589801	0.335119	0.254681	8.88378e-09	1.50366e-07		CXCR1|3577	1.34268	0.490309	1.64406e-09	6.98718e-09		EXTL1|2134	1.01132	-2.81254	0.00026273	0.00101258		CPA3|1359	-1.00884	3.44148	1.32e-07	5.13e-07
cg06445348	1	166917009	ILDR2	chr1:166916865-166917215	0.662914	0.312473	0.350441	1.63782e-15	1.19308e-13		cg12086936	11	31832879	PAX6	chr11:31831620-31839038	0.403515	0.120887	0.282628	8.06494e-08	4.62415e-06		cg09441363	1	215000000	KCNK2	chr1:215256051-215256636	0.547819	0.291875	0.255944	1.12967e-12	5.1509e-11		CXCR2P1|3580	1.44791	0.076886	3.72217e-12	2.04605e-11		EYA1|2138	-2.28245	-0.508059	2.26e-08	2.16e-07		CPA4|51200	-1.87633	-0.473788	1.08e-08	5e-08
cg09259179	1	166917267	ILDR2	chr1:166916865-166917215	0.715791	0.4463	0.269491	3.64958e-17	4.18914e-15		cg08005992	11	31832959	PAX6	chr11:31831620-31839038	0.471506	0.170716	0.30079	2.81386e-09	3.58799e-07		cg18794839	1	215000000	KCNK2	chr1:215256051-215256636	0.634307	0.371393	0.262915	4.56607e-13	2.3514e-11		CXCR4|7852	1.95243	5.1364	1.22951e-70	3.85117e-68		EYA2|2139	-1.74292	1.26554	7.11e-08	6.16e-07		CPA5|93979	-1.77337	-2.85737	8.84e-06	2.69e-05
cg18894878	1	166958221	MAEL	chr1:166958220-166958683	0.751769	0.433446	0.318323	4.46495e-14	2.17953e-12		cg25949958	11	31833007	PAX6	chr11:31831620-31839038	0.47216	0.144143	0.328017	9.47069e-09	8.94533e-07		cg10592245	1	215000000	KCNK2	chr1:215256051-215256636	0.438719	0.172799	0.26592	2.88223e-11	8.80967e-10		CXCR6|10663	1.26742	2.26072	1.87461e-19	1.91911e-18		EYA4|2070	2.65352	-0.749571	6.04e-11	9.7e-10		CPA6|57094	-2.46925	1.36333	1.92e-11	1.26e-10
cg06665322	1	167059365	GPA33		0.540442	0.27122	0.269222	2.17269e-09	3.32862e-08		cg14002345	11	31833016	PAX6	chr11:31831620-31839038	0.41343	0.132413	0.281017	1.8315e-08	1.4716e-06		cg11398511	1	215000000	KCNK2	chr1:215256051-215256636	0.715545	0.299048	0.416497	2.36705e-21	3.40293e-18		CXorf50B|653687	-1.84299	-0.0895915	3.78485e-15	2.77357e-14		F11|2160	-1.83303	-3.11767	4.81e-05	0.00022316		CPAMD8|27151	-1.34162	0.626325	9.04e-22	2.1e-20
cg02079933	1	167599631	RCSD1	chr1:167599464-167599839	0.554101	0.201553	0.352548	2.05822e-24	1.66748e-21		cg01665555	11	31834174	PAX6	chr11:31831620-31839038	0.522575	0.14219	0.380385	2.23344e-12	2.77548e-09		cg26547924	1	215000000	KCNK2	chr1:215256051-215256636	0.565589	0.310547	0.255042	3.59281e-11	1.07017e-09		CXXC4|80319	-1.20237	-1.08313	3.74443e-10	1.70326e-09		F13A1|2162	1.41169	3.12081	6.16e-09	6.6e-08		CPB1|1360	-2.43767	-2.71974	1.02e-07	4.06e-07
cg18800085	1	167599719	RCSD1	chr1:167599464-167599839	0.630346	0.321024	0.309322	1.15896e-14	6.64376e-13		cg02468250	11	31834344	PAX6	chr11:31831620-31839038	0.44399	0.177187	0.266803	4.51419e-11	1.94626e-08		cg05961348	1	215000000	KCNK2	chr1:215256051-215256636	0.606223	0.354445	0.251777	6.57552e-16	8.9946e-14		CYBB|1536	1.4993	4.8555	4.22696e-33	1.13146e-31		F5|2153	1.11951	3.87447	0.00105997	0.00348856		CPB2|1361	-7.35201	1.28557	4.8e-16	5.56e-15
cg16548605	1	169453550	SLC19A2	chr1:169454558-169455577	0.77218	0.394008	0.378172	1.64654e-14	9.08712e-13		cg02679809	11	31834791	PAX6	chr11:31831620-31839038	0.393104	0.0712951	0.321809	7.17569e-09	7.22933e-07		cg24700959	1	217000000	ESRRG		0.47518	0.131674	0.343506	6.0332e-10	1.33087e-08		CYP1A1|1543	3.84791	-0.184015	1.5332e-20	1.67526e-19		FABP1|2168	-2.61461	8.34396	1.64e-14	5.54e-13		CPE|1363	-2.22625	5.36455	2.38e-29	1.6e-27
cg18229820	1	169693534	SELE		0.676502	0.343108	0.333395	2.31215e-15	1.61107e-13		cg07905944	11	31834905	PAX6	chr11:31831620-31839038	0.363157	0.0645699	0.298587	6.51795e-09	6.69548e-07		cg10108237	1	217000000	ESRRG		0.443287	0.134918	0.308368	9.11837e-10	1.93069e-08		CYP1B1|1545	2.2446	1.73215	1.41024e-42	7.15295e-41		FABP2|2169	-1.44227	3.81448	6.67e-06	3.77e-05		CPEB1|64506	-1.49071	-1.15596	1.74e-12	1.3e-11
cg13065624	1	170253617	LOC284688		0.650382	0.384168	0.266214	1.73122e-10	3.43104e-09		cg21764190	11	31835534	PAX6	chr11:31831620-31839038	0.595197	0.271533	0.323664	1.2574e-08	1.11241e-06		cg18181196	1	217000000	ESRRG	chr1:217307744-217309179	0.470453	0.213086	0.257366	7.64991e-18	2.23237e-15		CYP26B1|56603	1.06533	1.23687	1.33141e-12	7.66805e-12		FABP4|2167	1.38409	-0.447824	4.84e-06	2.82e-05		CPLX3|594855	-2.66721	-1.52689	8.5e-07	2.98e-06
cg04909854	1	170253944	LOC284688		0.735252	0.429109	0.306143	1.74457e-14	9.55622e-13		cg02642123	11	31836334	PAX6	chr11:31831620-31839038	0.541222	0.27002	0.271201	9.57402e-08	5.30079e-06		cg03224209	1	217000000	ESRRG	chr1:217307744-217309179	0.574599	0.250633	0.323965	1.33977e-17	3.52397e-15		CYP2B6|1555	-2.81671	5.35193	6.43856e-36	2.07498e-34		FABP6|2172	-1.42235	2.88561	4.51e-06	2.66e-05		CPN1|1369	-4.91557	0.457273	3.22e-16	3.82e-15
cg10143731	1	171453943	BAT2L2	chr1:171454517-171455239	0.610723	0.315506	0.295217	1.15087e-12	3.8495e-11		cg07434271	11	31840698	PAX6	chr11:31841315-31842003	0.574016	0.321121	0.252895	1.04664e-09	1.71674e-07		cg26183250	1	217000000	ESRRG	chr1:217307744-217309179	0.459681	0.165237	0.294444	5.25818e-11	1.4937e-09		CYP2B7P1|1556	-1.68052	-0.0127137	2.362e-14	1.60835e-13		FADS6|283985	-2.42412	-2.27304	2.73e-06	1.68e-05		CPN2|1370	-6.14468	1.25876	2.87e-22	7.12e-21
cg06211893	1	171810778	DNM3	chr1:171810467-171811325	0.485968	0.21317	0.272799	2.26612e-09	3.45389e-08		cg20073320	11	33677621	C11orf41	chr11:33680219-33680428	0.846142	0.590117	0.256025	9.56161e-07	3.15965e-05		cg05388492	1	217000000	ESRRG	chr1:217307744-217309179	0.421359	0.141821	0.279538	1.46895e-12	6.44342e-11		CYP2C18|1562	1.00287	2.30632	3.56024e-08	1.31822e-07		FAIM2|23017	-1.22525	4.02813	3.18e-06	1.93e-05		CPNE1|8904	-1.24548	7.87375	1.34e-24	4.49e-23
cg05377226	1	171810910	DNM3	chr1:171810467-171811325	0.521712	0.241256	0.280456	3.43193e-08	3.94429e-07		cg03476291	11	33891205	LMO2	chr11:33890357-33891495	0.379593	0.124764	0.254829	2.75932e-07	1.20405e-05		cg01926051	1	217000000	ESRRG	chr1:217307744-217309179	0.576925	0.182686	0.394238	4.89559e-15	5.02189e-13		CYP2E1|1571	1.18914	-0.370273	4.47712e-10	2.01753e-09		FAM110B|90362	1.16667	0.30092	4.76e-11	7.82e-10		CPNE6|9362	-1.83101	-0.636181	3.04e-07	1.13e-06
cg26839871	1	171811299	DNM3	chr1:171810467-171811325	0.556551	0.25681	0.299741	1.63576e-10	3.25859e-09		cg27457284	11	35439994	SLC1A2	chr11:35440375-35441882	0.518756	0.241209	0.277547	1.51118e-09	2.26004e-07		cg09106903	1	217000000	ESRRG	chr1:217310749-217311178	0.514998	0.162343	0.352655	2.12314e-12	8.88254e-11		CYP2W1|54905	-2.60746	6.45592	9.19055e-14	5.92804e-13		FAM123C|205147	-1.6327	-2.85744	2.04e-05	0.00010313		CPNE9|151835	-1.57751	-1.07818	6.2e-11	3.8e-10
cg16515523	1	171811529	DNM3	chr1:171810467-171811325	0.461796	0.174864	0.286932	1.71582e-10	3.40444e-09		cg07724977	11	35441198	SLC1A2	chr11:35440375-35441882	0.55685	0.202333	0.354517	8.85772e-08	4.97662e-06		cg25851789	1	217000000	ESRRG	chr1:217310749-217311178	0.563484	0.289716	0.273767	3.12788e-12	1.24977e-10		CYP39A1|51302	-1.49842	3.47959	1.22755e-21	1.46698e-20		FAM124A|220108	1.05496	-0.273848	4.79e-07	3.48e-06		CPT1C|126129	-1.04373	1.74604	4.88e-12	3.44e-11
cg25722073	1	172351357	DNM3		0.543511	0.227397	0.316114	3.02774e-12	9.10824e-11		cg20062650	11	43963907	LOC387763	chr11:43963626-43966048	0.635602	0.323564	0.312037	6.03921e-06	0.000135296		cg12102320	1	218000000	RRP15	chr1:218458019-218458684	0.486574	0.140014	0.34656	5.0636e-20	3.60445e-17		CYP3A7|1551	-1.01942	-0.610372	8.41303e-06	2.32374e-05		FAM129A|116496	1.18247	3.50195	1.33e-14	4.55e-13		CPXM1|56265	-1.3105	4.70937	6.01e-20	1.11e-18
cg03748243	1	172413542	PIGC;C1orf105	chr1:172412867-172413281	0.628599	0.36767	0.260929	5.67462e-12	1.59301e-10		cg17456266	11	43964085	LOC387763	chr11:43963626-43966048	0.483652	0.216528	0.267124	1.321e-06	4.07743e-05		cg08160643	1	218000000	RRP15	chr1:218458019-218458684	0.36444	0.0792997	0.28514	3.58665e-15	3.83478e-13		CYP4F2|8529	-2.40801	3.64255	1.64138e-19	1.69003e-18		FAM131C|348487	1.52292	0.23672	1.93e-09	2.29e-08		CPXM2|119587	-1.44029	4.1656	3.5e-14	3.21e-13
cg24474279	1	173579110	ANKRD45		0.856338	0.597077	0.259261	3.63732e-21	1.28214e-18		cg11820517	11	43964150	LOC387763	chr11:43963626-43966048	0.514542	0.228673	0.285869	1.12149e-06	3.58287e-05		cg01558923	1	219000000	TGFB2	chr1:218519057-218519674	0.54642	0.229883	0.316536	2.84706e-14	2.2139e-12		CYP4F22|126410	1.49408	-2.51411	4.21941e-18	3.93591e-17		FAM133A|286499	-2.85848	-2.61218	2.49e-07	1.93e-06		CPZ|8532	-1.53624	4.57654	9.77e-31	8.08e-29
cg17014785	1	173639135	ANKRD45	chr1:173638662-173639045	0.738434	0.43425	0.304184	2.68377e-17	3.20474e-15		cg08993172	11	44327267	ALX4	chr11:44327240-44327932	0.48301	0.171852	0.311158	5.31676e-10	1.05499e-07		cg17721710	1	220000000	SLC30A10	chr1:220101132-220102147	0.67149	0.284552	0.386938	1.02354e-15	1.32718e-13		CYP7A1|1581	-1.52711	-3.26082	0.0032207	0.00601804		FAM134B|54463	-1.36274	4.75801	1.18e-16	5.84e-15		CRABP1|1381	1.01821	0.883556	0.00408321	0.00799286
cg07107171	1	175712382	TNR		0.422434	0.139676	0.282758	4.73904e-10	8.47261e-09		cg04970352	11	44327399	ALX4	chr11:44327240-44327932	0.616598	0.269021	0.347577	4.0807e-10	8.67854e-08		cg24933645	1	220000000	SLC30A10	chr1:220101132-220102147	0.613291	0.283535	0.329756	3.39659e-16	5.11909e-14		CYSLTR2|57105	1.06065	-1.39735	1.98481e-08	7.54936e-08		FAM150A|389658	-1.02987	-0.362658	0.00013744	0.00057013		CRABP2|1382	-1.22853	3.9347	8.29e-07	2.91e-06
cg02102020	1	177150789	FAM5B	chr1:177150814-177151165	0.402313	0.121721	0.280592	1.65718e-13	6.94798e-12		cg08914623	11	44327572	ALX4	chr11:44327240-44327932	0.415451	0.130795	0.284656	7.80637e-12	6.08888e-09		cg10325600	1	220000000	SLC30A10	chr1:220101132-220102147	0.499233	0.203414	0.29582	4.86172e-17	1.01555e-14		CYTH4|27128	1.46943	3.04264	5.17656e-38	1.90561e-36		FAM169B|283777	1.12634	-1.34799	0.00743052	0.0193224		CRB2|286204	-1.51885	2.32221	3.88e-13	3.13e-12
cg06321345	1	177150848	FAM5B	chr1:177150814-177151165	0.485904	0.0504393	0.435464	2.89032e-13	1.1375e-11		cg02030672	11	45687055	CHST1	chr11:45686160-45687495	0.582637	0.283103	0.299534	9.11313e-08	5.0937e-06		cg23815582	1	220000000	SLC30A10	chr1:220101132-220102147	0.476302	0.10316	0.373142	2.13962e-15	2.49305e-13		CYTIP|9595	1.25579	2.67731	1.10433e-25	1.77149e-24		FAM171A2|284069	1.54859	0.168418	4.04e-13	1.02e-11		CRCT1|54544	-4.27616	-1.32934	3.23e-08	1.38e-07
cg03884587	1	177150934	FAM5B	chr1:177150814-177151165	0.422503	0.0676591	0.354844	1.12796e-14	6.49144e-13		cg12266841	11	45687263	CHST1	chr11:45686160-45687495	0.512188	0.152735	0.359453	1.27445e-10	3.8652e-08		cg25317664	1	220000000	SLC30A10	chr1:220101132-220102147	0.427128	0.0730033	0.354124	1.60602e-13	9.57917e-12		CYTL1|54360	1.18021	-1.20597	2.37729e-12	1.33893e-11		FAM177B|400823	-1.12979	1.80682	0.00089047	0.00298147		CREB3L1|90993	1.01059	7.22208	4.67e-11	2.9e-10
cg12042448	1	177151076	FAM5B	chr1:177150814-177151165	0.400732	0.0753791	0.325353	2.77626e-11	6.62499e-10		cg24679395	11	45687275	CHST1	chr11:45686160-45687495	0.530553	0.145771	0.384782	2.53389e-11	1.31498e-08		cg12355180	1	220000000	SLC30A10	chr1:220101132-220102147	0.553049	0.175522	0.377528	8.83824e-15	8.26018e-13		D4S234E|27065	-1.59159	1.93149	2.22334e-19	2.26573e-18		FAM179A|165186	1.28125	-0.859327	1.08e-07	8.92e-07		CREB3L3|84699	-2.43077	2.00422	2.97e-10	1.69e-09
cg27174972	1	177151164	FAM5B	chr1:177150814-177151165	0.570921	0.208713	0.362207	3.53598e-12	1.0457e-10		cg10817615	11	45687277	CHST1	chr11:45686160-45687495	0.482795	0.147042	0.335753	3.45192e-11	1.64469e-08		cg25841634	1	220000000	SLC30A10	chr1:220101132-220102147	0.416864	0.0935119	0.323352	4.7645e-14	3.41725e-12		DAB1|1600	-1.85093	-1.02542	8.71081e-10	3.8053e-09		FAM180A|389558	1.11427	-1.33163	1.77e-06	1.13e-05		CREG2|200407	1.18781	-0.483666	2.49e-05	7.06e-05
cg01931994	1	177225850	FAM5B		0.444939	0.173145	0.271794	1.36199e-11	3.48429e-10		cg09426197	11	45687281	CHST1	chr11:45686160-45687495	0.552468	0.191124	0.361343	7.36233e-11	2.69226e-08		cg27295373	1	220000000	SLC30A10	chr1:220101132-220102147	0.713188	0.460456	0.252732	2.05541e-22	4.90084e-19		DACH1|1602	-1.81355	5.30449	1.15042e-21	1.37942e-20		FAM181B|220382	-2.03296	-1.85345	1.36e-06	8.94e-06		CRHBP|1393	-2.06244	-1.89755	5.96e-11	3.66e-10
cg19315261	1	177225876	FAM5B		0.480267	0.218336	0.261931	4.43105e-11	1.00777e-09		cg08382705	11	45687319	CHST1	chr11:45686160-45687495	0.560885	0.136027	0.424857	5.94418e-11	2.33698e-08		cg19313402	1	220000000	SLC30A10	chr1:220101132-220102147	0.748578	0.473107	0.275471	7.17843e-27	1.05263e-22		DACH2|117154	-2.00177	-3.18832	6.61367e-08	2.36729e-07		FAM184A|79632	1.44649	-1.38031	1.76e-06	1.13e-05		CRHR1|1394	-2.17579	-3.16372	1.11e-07	4.38e-07
cg26272214	1	177225888	FAM5B		0.683743	0.332921	0.350821	5.77182e-14	2.72802e-12		cg08257923	11	45687443	CHST1	chr11:45686160-45687495	0.568884	0.218664	0.35022	8.30115e-11	2.88451e-08		cg19720265	1	221000000	MARK1	chr1:220701507-220702348	0.46505	0.135173	0.329877	4.05217e-14	2.97816e-12		DAPK1|1612	2.49851	4.20602	4.06015e-79	2.33838e-76		FAM184B|27146	-2.91192	-1.74244	7.01e-11	1.11e-09		CRHR2|1395	-1.49262	-2.97932	1.34e-06	4.58e-06
cg07961456	1	178488431	C1orf49		0.643338	0.393331	0.250008	3.16216e-17	3.69476e-15		cg16293069	11	45687494	CHST1	chr11:45686160-45687495	0.593685	0.247292	0.346393	3.38431e-10	7.61149e-08		cg07420190	1	221000000	MARK1	chr1:220701507-220702348	0.560783	0.127382	0.433402	5.58662e-14	3.90193e-12		DAPK2|23604	-1.50049	4.72605	4.73439e-41	2.08711e-39		FAM189A1|23359	-2.15311	1.75776	3.17e-08	2.95e-07		CRISP3|10321	1.82921	-3.10077	3.88e-05	0.0001066
cg23891286	1	178994301	FAM20B	chr1:178994804-178995917	0.969386	0.706453	0.262933	4.45778e-19	8.91994e-17		cg07065803	11	45921557	MAPK8IP1	chr11:45921387-45922167	0.49461	0.204488	0.290122	1.10952e-08	1.00992e-06		cg14231871	1	221000000	MARK1	chr1:220701507-220702348	0.471694	0.136812	0.334882	1.71198e-11	5.5491e-10		DAPP1|27071	1.25259	2.67555	3.3966e-15	2.49765e-14		FAM196B|100131897	1.54337	-2.87783	8.39e-08	7.16e-07		CRISPLD1|83690	-2.03563	2.31036	2.38e-38	7.93e-36
cg08186924	1	179544721	NPHS2	chr1:179544720-179545307	0.549869	0.233672	0.316197	6.98191e-15	4.25967e-13		cg10503202	11	46354635	DGKZ	chr11:46354091-46355190	0.392592	0.108666	0.283926	7.48703e-06	0.000160369		cg14154859	1	221000000	MARK1	chr1:220701507-220702348	0.515629	0.251456	0.264174	2.01488e-11	6.41907e-10		DAZ1|1617	-2.5485	0.892075	0.000524201	0.00111524		FAM19A1|407738	1.90433	-1.49121	1.61e-11	2.93e-10		CRISPLD2|83716	-1.01984	6.05768	2.9e-17	3.89e-16
cg08229358	1	179544765	NPHS2	chr1:179544720-179545307	0.622752	0.251571	0.371181	3.33732e-13	1.29125e-11		cg27137887	11	46513635	AMBRA1		0.650746	0.358221	0.292525	3.08179e-15	3.92964e-11		cg21878149	1	221000000	HLX	chr1:221051966-221053673	0.541423	0.275716	0.265706	1.6664e-14	1.40571e-12		DAZ2|57055	-4.77159	-0.339595	2.1539e-07	7.25581e-07		FAM20A|54757	1.96108	1.62393	8.51e-27	4.59e-24		CRMP1|1400	-1.76987	2.56751	1.38e-29	9.63e-28
cg10980436	1	179545073	NPHS2	chr1:179544720-179545307	0.342584	0.0575296	0.285055	1.53759e-13	6.50423e-12		cg03522150	11	46969673	C11orf49		0.764414	0.402063	0.36235	2.13481e-15	2.98137e-11		cg02625929	1	221000000	HLX	chr1:221051966-221053673	0.489228	0.202075	0.287153	2.13386e-13	1.2231e-11		DAZ3|57054	-5.3486	0.0665295	4.48206e-08	1.63914e-07		FAM20C|56975	1.23827	4.30962	1.51e-22	2.59e-20		CRNN|49860	-3.7289	-3.13871	1.62e-06	5.46e-06
cg06515144	1	179545091	NPHS2	chr1:179544720-179545307	0.410504	0.0500202	0.360484	2.38258e-13	9.57457e-12		cg19460817	11	47575278	CUGBP1	chr11:47573911-47574899	0.66862	0.411782	0.256838	4.78318e-09	5.34397e-07		cg18704691	1	221000000	HLX	chr1:221051966-221053673	0.557839	0.170216	0.387623	2.79565e-14	2.17941e-12		DAZL|1618	1.03205	-3.16466	1.22879e-06	3.76761e-06		FAM23A|653567	-1.10413	3.06429	6.74e-05	0.00030183		CRP|1401	-13.269	6.45763	1.58e-21	3.56e-20
cg20701486	1	179545134	NPHS2	chr1:179544720-179545307	0.341756	0.0362322	0.305524	2.67477e-10	5.07076e-09		cg01888601	11	47736182	AGBL2	chr11:47736739-47737106	0.663659	0.404586	0.259073	6.75333e-09	6.86751e-07		cg23027583	1	221000000	HLX	chr1:221051966-221053673	0.428481	0.0946015	0.33388	1.27845e-12	5.72235e-11		DBC1|1620	-1.33125	-0.598126	2.9649e-06	8.67508e-06		FAM25A|643161	1.5928	-2.46652	0.0035233	0.0100773		CRTAC1|55118	-2.49459	0.167973	1e-18	1.6e-17
cg13931925	1	179545216	NPHS2	chr1:179544720-179545307	0.371861	0.0475388	0.324322	2.05869e-14	1.10681e-12		cg06051146	11	57424284	CLP1	chr11:57424937-57425262	0.614816	0.339438	0.275378	2.64116e-09	3.41981e-07		cg18800479	1	221000000	HLX	chr1:221051966-221053673	0.409516	0.0742294	0.335287	8.47983e-12	2.99099e-10		DBH|1621	1.37107	-2.0801	7.48777e-13	4.41648e-12		FAM26F|441168	1.7181	2.60277	2.12e-14	6.98e-13		CRTAM|56253	1.05028	0.0117427	1.66e-08	7.43e-08
cg19016332	1	179545294	NPHS2	chr1:179544720-179545307	0.481653	0.159779	0.321874	2.08745e-14	1.12083e-12		cg13388111	11	61062665	VWCE	chr11:61061751-61063063	0.44322	0.0662872	0.376933	4.447e-09	5.06485e-07		cg09580567	1	221000000	HLX	chr1:221051966-221053673	0.397102	0.0887153	0.308387	6.57365e-10	1.43883e-08		DBN1|1627	1.30179	5.72539	7.85299e-31	1.79753e-29		FAM3D|131177	-2.24568	8.28155	1.32e-29	1.8e-26		CRYAA|1409	-3.91672	-2.61639	8.89e-10	4.71e-09
cg02634341	1	179711583	FAM163A	chr1:179711947-179713951	0.537156	0.25757	0.279586	2.61972e-13	1.04293e-11		cg04017555	11	61062704	VWCE	chr11:61061751-61063063	0.529582	0.182486	0.347096	9.90145e-12	7.0999e-09		cg19099796	1	221000000	HLX	chr1:221051966-221053673	0.367531	0.0772856	0.290245	5.18512e-09	9.26447e-08		DBX1|120237	-1.54729	-3.15014	3.20425e-06	9.34171e-06		FAM43B|163933	1.49397	-2.59786	3.92e-08	3.55e-07		CRYAB|1410	-2.03938	3.95819	5.33e-36	1.05e-33
cg17836735	1	180198325	LHX4	chr1:180198119-180204975	0.289698	0.0223686	0.26733	1.1416e-09	1.86722e-08		cg27175288	11	61062837	VWCE	chr11:61061751-61063063	0.384427	0.0967522	0.287675	9.77306e-08	5.38557e-06		cg22888665	1	221000000	HLX	chr1:221051966-221053673	0.330007	0.0564958	0.273512	7.97508e-09	1.36363e-07		DCBLD2|131566	1.54436	5.00883	4.81554e-31	1.11081e-29		FAM46B|115572	1.32394	0.794858	7.76e-11	1.22e-09		CRYBA2|1412	1.9059	-0.24323	8.81e-09	4.1e-08
cg24198584	1	180198528	LHX4	chr1:180198119-180204975	0.578034	0.133931	0.444103	3.53474e-18	5.45608e-16		cg05190577	11	61062843	VWCE	chr11:61061751-61063063	0.401369	0.138824	0.262545	1.40488e-08	1.20121e-06		cg04683240	1	221000000	HLX	chr1:221051966-221053673	0.431371	0.0795263	0.351844	4.14783e-09	7.57682e-08		DDAH2|23564	-1.08319	6.47315	2.38358e-24	3.47399e-23		FAM49A|81553	1.16494	0.797721	2.87e-10	3.97e-09		CRYBA4|1413	1.98972	-1.89275	3.36e-12	2.42e-11
cg22352152	1	180201319	LHX4	chr1:180198119-180204975	0.473271	0.220055	0.253216	1.35299e-08	1.71493e-07		cg07402729	11	61062902	VWCE	chr11:61061751-61063063	0.474131	0.20413	0.270001	1.46068e-09	2.20248e-07		cg12405785	1	221000000	HLX	chr1:221051966-221053673	0.516591	0.115267	0.401324	5.32673e-10	1.18906e-08		DDC|1644	-1.38887	6.29614	3.54109e-22	4.40576e-21		FAM55A|120400	-1.65882	4.00519	9.14e-09	9.44e-08		CSAG1|158511	-1.56585	0.693137	0.0161871	0.0280384
cg00838919	1	180201891	LHX4	chr1:180198119-180204975	0.57183	0.230731	0.3411	6.45812e-16	5.28021e-14		cg06282270	11	61062910	VWCE	chr11:61061751-61063063	0.566575	0.196003	0.370571	2.89166e-09	3.66331e-07		cg15356516	1	221000000	HLX	chr1:221051966-221053673	0.504931	0.135565	0.369367	9.15762e-09	1.54493e-07		DDIT4L|115265	-1.73626	0.0425244	5.90312e-09	2.37321e-08		FAM55B|120406	-1.3243	1.70017	1.41e-06	9.21e-06		CSDC2|27254	-2.30665	1.78178	5.51e-39	2.28e-36
cg08647912	1	180201893	LHX4	chr1:180198119-180204975	0.518415	0.196456	0.321959	1.07666e-14	6.24039e-13		cg09676684	11	61062962	VWCE	chr11:61061751-61063063	0.675255	0.420907	0.254348	6.55484e-08	3.93124e-06		cg13357903	1	223000000	MIA3	chr1:222790947-222791220	0.323049	0.0351648	0.287885	8.52239e-08	1.16899e-06		DDO|8528	-1.48507	1.53336	1.69996e-11	8.80252e-11		FAM55D|54827	-2.27695	4.49097	1.3e-09	1.6e-08		CSMD1|64478	-2.00652	-2.45882	4.52e-08	1.89e-07
cg26410483	1	180203143	LHX4	chr1:180198119-180204975	0.323389	0.0483812	0.275008	1.59098e-09	2.51833e-08		cg01698298	11	61062964	VWCE	chr11:61061751-61063063	0.585418	0.316124	0.269294	2.05723e-07	9.63815e-06		cg04232325	1	224000000	SUSD4	chr1:223536842-223538628	0.389398	0.049241	0.340157	2.01089e-08	3.14196e-07		DDX27|55661	-1.39598	7.00463	1.65708e-56	2.1754e-54		FAM5B|57795	-2.25643	-3.09929	2.98e-08	2.79e-07		CSMD2|114784	-1.60095	1.22552	3.42e-15	3.59e-14
cg00882235	1	180203488	LHX4	chr1:180198119-180204975	0.448517	0.111001	0.337515	7.9596e-12	2.15665e-10		cg25401284	11	61582697	MIR1908;FADS1	chr11:61582573-61584728	0.430648	0.176849	0.253799	6.29981e-06	0.000139799		cg10856813	1	224000000	SUSD4	chr1:223536842-223538628	0.395094	0.108531	0.286562	2.55621e-09	4.89216e-08		DDX53|168400	-2.44579	-2.66026	0.000177031	0.000405117		FAM5C|339479	-1.61085	0.913664	0.00340251	0.00978065		CSRNP3|80034	-1.02522	-1.89891	2.45e-05	6.96e-05
cg05719164	1	180204221	LHX4	chr1:180198119-180204975	0.59667	0.0398106	0.55686	1.17706e-18	2.0708e-16		cg12517394	11	61582795	MIR1908;FADS1	chr11:61582573-61584728	0.4437	0.177866	0.265834	1.51881e-06	4.55869e-05		cg15100599	1	224000000	SUSD4	chr1:223536842-223538628	0.541837	0.244157	0.297681	1.75727e-20	1.62403e-17		DDX60|55601	1.20935	5.14052	1.95426e-21	2.297e-20		FAM69C|125704	2.25179	-0.765947	1.13e-08	1.14e-07		CST1|1469	-1.82032	5.81825	3.06e-12	2.21e-11
cg11189384	1	180204379	LHX4	chr1:180198119-180204975	0.501257	0.114543	0.386714	1.27959e-16	1.26996e-14		cg15598662	11	61582890	MIR1908;FADS1	chr11:61582573-61584728	0.472307	0.19524	0.277066	4.42509e-06	0.000105794		cg12307840	1	224000000	SUSD4	chr1:223536842-223538628	0.681062	0.320389	0.360673	2.76547e-23	8.91258e-20		DEFA1B|728358	1.25968	-2.10801	0.000124452	0.000291253		FAM78A|286336	1.04417	2.63373	2.58e-14	8.39e-13		CST2|1470	-1.76703	1.99259	2.88e-10	1.64e-09
cg18863156	1	180204417	LHX4	chr1:180198119-180204975	0.372408	0.088488	0.28392	1.90509e-13	7.85714e-12		cg27173322	11	61584112	MIR1908;FADS1	chr11:61582573-61584728	0.374251	0.107576	0.266676	3.96845e-06	9.71008e-05		cg00172597	1	224000000	SUSD4	chr1:223536842-223538628	0.505406	0.183096	0.32231	4.9984e-16	7.09541e-14		DEFA5|1670	1.15536	6.18264	0.00742953	0.0130289		FAM83C|128876	-1.93904	-2.40872	6.75e-07	4.74e-06		CST4|1472	-1.60081	2.08907	3.33e-08	1.42e-07
cg23598080	1	180204499	LHX4	chr1:180198119-180204975	0.484392	0.0812688	0.403124	2.31663e-16	2.12449e-14		cg01612408	11	63803781	MACROD1	chr11:63803375-63804365	0.583026	0.2584	0.324626	6.21912e-11	2.40623e-08		cg08892600	1	224000000	SUSD4	chr1:223536842-223538628	0.402241	0.115889	0.286352	2.60398e-14	2.05789e-12		DEFB1|1672	-1.82066	1.79493	1.46923e-14	1.02069e-13		FAM83E|54854	-1.16362	5.55053	1.99e-16	9.44e-15		CST5|1473	-4.02452	-1.28858	4.45e-17	5.86e-16
cg18063017	1	180204974	LHX4	chr1:180198119-180204975	0.543008	0.199419	0.343589	3.297e-12	9.82554e-11		cg18669654	11	63803839	MACROD1	chr11:63803375-63804365	0.590117	0.338987	0.251129	2.06922e-08	1.61268e-06		cg21447550	1	224000000	SUSD4	chr1:223536842-223538628	0.474736	0.117786	0.356951	1.00597e-14	9.20808e-13		DEFB103B|414325	2.2091	-3.12732	9.23059e-08	3.24863e-07		FAP|2191	1.0371	3.78337	4.01e-06	2.39e-05		CST6|1474	-4.93509	2.80062	3.04e-24	9.76e-23
cg14989164	1	180205157	LHX4	chr1:180198119-180204975	0.335013	0.0534314	0.281581	4.40001e-10	7.92299e-09		cg19674138	11	63804021	MACROD1	chr11:63803375-63804365	0.493089	0.161449	0.33164	1.86742e-11	1.07809e-08		cg03200052	1	224000000	SUSD4	chr1:223536842-223538628	0.423152	0.106345	0.316806	1.57598e-12	6.85244e-11		DGAT2|84649	-1.20717	5.55074	5.09485e-32	1.25294e-30		FASLG|356	1.55397	0.559017	2.44e-12	5.29e-11		CT45A1|541466	-6.44827	-0.87978	1.82e-12	1.35e-11
cg26225694	1	180205253	LHX4	chr1:180198119-180204975	0.478433	0.110127	0.368306	5.56902e-14	2.64281e-12		cg12880967	11	63804044	MACROD1	chr11:63803375-63804365	0.500162	0.246674	0.253488	5.60111e-10	1.09878e-07		cg08038504	1	225000000	CNIH3	chr1:224803637-224805314	0.42613	0.125162	0.300968	7.63457e-11	2.0807e-09		DGCR5|26220	1.30067	-0.61647	1.76046e-08	6.72901e-08		FBLL1|345630	1.17821	-2.12817	9.18e-05	0.000397		CT45A2|728911	-6.72209	-1.58867	2.95e-13	2.41e-12
cg23056823	1	180881583	KIAA1614	chr1:180881316-180882592	0.301197	0.0243991	0.276798	5.10701e-07	4.4187e-06		cg21667796	11	63804119	MACROD1	chr11:63803375-63804365	0.569186	0.196927	0.372259	1.23434e-11	8.15323e-09		cg03127713	1	225000000	CNIH3	chr1:224803637-224805314	0.524629	0.263847	0.260783	8.36078e-10	1.78862e-08		DGCR9|25787	1.49417	-1.96682	1.27591e-11	6.66065e-11		FBLN2|2199	1.708	4.81819	7.89e-16	3.35e-14		CT45A3|441519	-6.99867	-1.32113	1.19e-12	9.03e-12
cg07730364	1	180881646	KIAA1614	chr1:180881316-180882592	0.351109	0.0511122	0.299997	4.50548e-09	6.39847e-08		cg06219103	11	63990595	FERMT3	chr11:63993589-63993834	0.889513	0.597166	0.292347	1.00461e-09	1.67173e-07		cg23816049	1	225000000	CNIH3	chr1:224803637-224805314	0.497793	0.243107	0.254686	1.90571e-09	3.75276e-08		DHDPSL|112817	-2.48535	0.277112	1.5475e-24	2.30434e-23		FBN1|2200	1.20472	5.85952	1.83e-14	6.1e-13		CT45A4|441520	-6.59579	-1.63209	3.54e-12	2.53e-11
cg12604950	1	180882287	KIAA1614	chr1:180881316-180882592	0.583381	0.246375	0.337006	4.61867e-19	9.17092e-17		cg06243084	11	63990629	FERMT3	chr11:63993589-63993834	0.948109	0.693915	0.254194	4.53349e-09	5.1394e-07		cg02242289	1	225000000	CNIH3	chr1:224803637-224805314	0.509176	0.209675	0.299502	5.18341e-10	1.16088e-08		DHRS12|79758	-1.1657	3.67541	4.19265e-32	1.04256e-30		FBN3|84467	1.88968	-3.00639	6.14e-05	0.00027761		CT45A5|441521	-6.37163	-1.53652	1.43e-12	1.07e-11
cg06986584	1	180904677	KIAA1614	chr1:180904316-180904711	0.870987	0.507691	0.363296	2.97258e-19	6.20047e-17		cg06129498	11	64058937	KCNK4	chr11:64058808-64060118	0.492367	0.235438	0.256929	1.87316e-10	5.07721e-08		cg25723050	1	225000000	CNIH3	chr1:224803637-224805314	0.588943	0.295412	0.293531	1.13201e-10	2.96407e-09		DHRS2|10202	2.33822	2.96995	1.25024e-20	1.37534e-19		FBP2|8789	-1.16136	-2.7145	0.00062429	0.00218359		CT45A6|541465	-6.63294	-1.61167	1.79e-12	1.33e-11
cg01391650	1	180904703	KIAA1614	chr1:180904316-180904711	0.648619	0.38559	0.263029	3.15415e-14	1.60624e-12		cg09396196	11	64059054	KCNK4	chr11:64058808-64060118	0.615824	0.2197	0.396124	1.9472e-10	5.1821e-08		cg18564989	1	226000000	MIXL1	chr1:226411007-226411880	0.445577	0.141342	0.304236	2.70253e-11	8.32112e-10		DIO3|1735	-1.80674	3.45135	3.40735e-09	1.40431e-08		FBXL16|146330	1.54204	3.76165	9.25e-14	2.63e-12		CTAG1B|1485	-5.33537	-0.209562	1.26e-10	7.48e-10
cg13948585	1	181451906	CACNA1E	chr1:181451311-181452049	0.532269	0.195205	0.337064	9.42246e-13	3.21835e-11		cg14673256	11	64059057	KCNK4	chr11:64058808-64060118	0.536916	0.192389	0.344527	7.62852e-11	2.74511e-08		cg24405179	1	226000000	MIXL1	chr1:226411007-226411880	0.341553	0.0307708	0.310782	5.79021e-10	1.28219e-08		DIO3OS|64150	-1.69044	0.490803	4.82632e-15	3.49996e-14		FBXO15|201456	1.60839	-2.32119	2.21e-09	2.59e-08		CTAG2|30848	-5.35092	0.44131	4.23e-10	2.34e-09
cg21963643	1	181451911	CACNA1E	chr1:181451311-181452049	0.486946	0.150418	0.336528	9.14392e-13	3.13136e-11		cg10028227	11	64059307	KCNK4	chr11:64058808-64060118	0.570462	0.20092	0.369542	2.97535e-09	3.74506e-07		cg26886972	1	226000000	MIXL1	chr1:226411007-226411880	0.323594	0.027345	0.296249	3.37336e-09	6.27903e-08		DIRAS3|9077	2.39216	-0.0672185	1.8118e-41	8.33706e-40		FBXO2|26232	2.268	2.99142	8.57e-11	1.34e-09		CTF1|1489	-1.32118	1.18003	3.97e-16	4.65e-15
cg18533386	1	181452039	CACNA1E	chr1:181451311-181452049	0.536443	0.18407	0.352372	3.67702e-12	1.08402e-10		cg13703584	11	64059916	KCNK4	chr11:64058808-64060118	0.349084	0.0894527	0.259631	2.08032e-10	5.40876e-08		cg15147516	1	226000000	MIXL1	chr1:226411007-226411880	0.335895	0.0681588	0.267736	2.40488e-09	4.63187e-08		DIRC3|729582	1.04464	-2.89307	1.20271e-07	4.18171e-07		FBXO39|162517	1.43242	-1.62589	1.26e-05	6.73e-05		CTGF|1490	-1.11031	7.84111	6.28e-16	7.18e-15
cg02974928	1	181452044	CACNA1E	chr1:181451311-181452049	0.590496	0.204899	0.385597	2.28489e-12	7.08056e-11		cg03784628	11	64059937	KCNK4	chr11:64058808-64060118	0.434679	0.169454	0.265225	1.95161e-11	1.10895e-08		cg20841596	1	227000000	C1orf95	chr1:226736354-226737412	0.396737	0.0274772	0.36926	4.91623e-12	1.85261e-10		DKFZp434J0226|93429	1.70365	-2.48584	3.30949e-15	2.43661e-14		FBXW10|10517	1.44449	-1.32122	2.65e-07	2.04e-06		CTNNA2|1496	-1.62991	1.00205	0.00013545	0.00034293
cg15742412	1	181452048	CACNA1E	chr1:181451311-181452049	0.565875	0.222752	0.343123	1.72739e-13	7.2073e-12		cg25168700	11	64067685	C11orf20	chr11:64066757-64068741	0.409705	0.150883	0.258822	4.64894e-11	1.97948e-08		cg15592945	1	227000000	C1orf95	chr1:226736354-226737412	0.524792	0.0893173	0.435475	8.83488e-16	1.17402e-13		DKFZP434K028|26070	1.60013	-3.32974	2.11617e-11	1.086e-10		FCAR|2204	1.76967	-0.716945	4.28e-07	3.15e-06		CTNND2|1501	-2.01199	-1.63692	9.7e-12	6.59e-11
cg00304388	1	181454744	CACNA1E	chr1:181454974-181455261	0.520011	0.249706	0.270305	1.52746e-10	3.06197e-09		cg24524285	11	64405919	NRXN2	chr11:64405451-64406006	0.463564	0.15474	0.308823	1.08009e-08	9.89272e-07		cg03745431	1	227000000	C1orf95	chr1:226736354-226737412	0.546483	0.132723	0.41376	3.25478e-19	1.68351e-16		DKFZp686A1627|266695	-3.27338	-3.29748	1.15697e-07	4.03292e-07		FCER1G|2207	1.71434	4.40344	2.79e-28	2.39e-25		CTSE|1510	2.06956	6.27432	1.8e-11	1.18e-10
cg26916166	1	183387420	NMNAT2	chr1:183386000-183387664	0.574159	0.319757	0.254402	7.63542e-07	6.33659e-06		cg15939287	11	64406051	NRXN2	chr11:64405451-64406006	0.682585	0.349063	0.333523	4.61575e-13	9.33577e-10		cg01318248	1	227000000	C1orf95	chr1:226736354-226737412	0.400619	0.077183	0.323436	6.95373e-13	3.39046e-11		DKK1|22943	1.92922	0.909566	1.39586e-09	5.98506e-09		FCGBP|8857	-1.96583	11.5067	9.7e-12	1.86e-10		CTSF|8722	-1.25281	4.44469	6.82e-22	1.6e-20
cg00767642	1	183387422	NMNAT2	chr1:183386000-183387664	0.538318	0.250428	0.287889	9.2861e-07	7.55199e-06		cg24407327	11	64411428	NRXN2	chr11:64409877-64411253	0.441445	0.075876	0.365569	6.53784e-11	2.49986e-08		cg16705351	1	227000000	C1orf95	chr1:226736354-226737412	0.40823	0.0649537	0.343276	2.62254e-12	1.0721e-10		DLG2|1740	1.02211	-1.35494	7.50456e-09	2.98943e-08		FCGR1A|2209	2.36374	2.25833	3.01e-22	5e-20		CTSG|1511	-1.29125	0.70069	4.42e-06	1.4e-05
cg20579480	1	183622007	APOBEC4;RGL1		0.48226	0.211597	0.270662	4.4644e-14	2.17953e-12		cg27017482	11	64481257	NRXN2	chr11:64480199-64481344	0.579739	0.298513	0.281226	1.24593e-07	6.51108e-06		cg07046852	1	227000000	C1orf95	chr1:226736354-226737412	0.526193	0.126125	0.400068	1.05363e-16	1.91809e-14		DLK2|65989	1.80186	-1.25114	4.31665e-20	4.60391e-19		FCGR1B|2210	2.24228	1.7567	1.2e-27	7.6e-25		CTSK|1513	-1.22207	7.08247	1.58e-22	4.09e-21
cg17927730	1	185013789	RNF2	chr1:185014369-185015220	0.669386	0.358795	0.310591	5.75431e-17	6.27594e-15		cg18492647	11	64512188	RASGRP2	chr11:64509433-64513826	0.43743	0.15679	0.28064	1.74235e-06	5.07436e-05		cg17180977	1	228000000	WNT9A	chr1:228134422-228136282	0.376229	0.0984629	0.277766	4.00895e-08	5.89693e-07		DLX3|1747	-4.91311	1.43989	1.51857e-34	4.45931e-33		FCGR1C|100132417	2.36048	1.23023	2.65e-19	2.25e-17		CTSL2|1515	-1.12739	3.91112	8.43e-10	4.49e-09
cg16721191	1	185703526	HMCN1	chr1:185703458-185703662	0.346014	0.0687561	0.277258	1.21016e-07	1.22276e-06		cg08378782	11	64512197	RASGRP2	chr11:64509433-64513826	0.467339	0.15909	0.308249	2.08089e-06	5.84668e-05		cg07021033	1	228000000	WNT9A	chr1:228134422-228136282	0.333327	0.0512493	0.282077	2.20508e-07	2.75648e-06		DLX6|1750	-1.47916	0.187754	0.00010201	0.000241685		FCGR2A|2212	1.84735	5.33729	2.68e-33	1.19e-29		CTSW|1521	1.27408	2.19138	1.17e-13	1.01e-12
cg18390472	1	185703538	HMCN1	chr1:185703458-185703662	0.362493	0.089963	0.27253	6.76274e-08	7.25395e-07		cg06409432	11	64512199	RASGRP2	chr11:64509433-64513826	0.385961	0.133486	0.252475	2.75921e-06	7.29676e-05		cg06641299	1	228000000	WNT9A	chr1:228134422-228136282	0.37794	0.0628224	0.315118	5.38027e-13	2.71397e-11		DLX6AS|285987	-2.65843	-0.817332	1.86565e-11	9.61863e-11		FCGR2B|2213	2.33601	2.85579	6.79e-22	1.02e-19		CTTNBP2|83992	-2.46079	3.15362	1.29e-26	5.53e-25
cg13496323	1	185703548	HMCN1	chr1:185703458-185703662	0.337875	0.0599603	0.277915	4.56506e-07	3.99911e-06		cg02403180	11	65640375	EFEMP2	chr11:65639835-65641374	0.563985	0.2612	0.302786	7.33043e-07	2.5664e-05		cg01051310	1	228000000	WNT3A	chr1:228194096-228196512	0.583668	0.301824	0.281844	1.95192e-11	6.23315e-10		DMBX1|127343	1.72956	0.111787	1.96307e-13	1.22334e-12		FCGR2C|9103	2.31934	2.57981	1.93e-16	9.21e-15		CTXN2|399697	-2.24999	-3.37617	2.02e-06	6.71e-06
cg15842216	1	185703688	HMCN1	chr1:185703458-185703662	0.346075	0.0888976	0.257178	8.18055e-08	8.6087e-07		cg04327181	11	65779526	CST6	chr11:65779311-65779767	0.371662	0.0763671	0.295295	4.56247e-09	5.16228e-07		cg05802452	1	228000000	WNT3A	chr1:228194096-228196512	0.482647	0.156677	0.32597	1.1171e-10	2.92909e-09		DMD|1756	-1.79352	3.54927	2.64506e-25	4.16079e-24		FCGR3A|2214	2.23768	5.60219	2.03e-30	4.5e-27		CUX2|23316	-2.76885	-1.43396	4.76e-12	3.36e-11
cg06194982	1	185703877	HMCN1	chr1:185703458-185703662	0.49127	0.223524	0.267745	1.87293e-09	2.9124e-08		cg15913680	11	72353343	PDE2A	chr11:72353222-72354358	0.500268	0.209955	0.290313	6.63966e-09	6.77541e-07		cg08037440	1	228000000	WNT3A	chr1:228194096-228196512	0.495028	0.230658	0.26437	6.25036e-11	1.74214e-09		DMKN|93099	1.1122	3.83434	4.59943e-08	1.68034e-07		FCGR3B|2215	1.96205	3.23575	7.47e-10	9.63e-09		CWH43|80157	-1.50377	0.93682	0.00027395	0.00065935
cg07422329	1	186642182	PTGS2		0.545552	0.246466	0.299086	7.10111e-13	2.51004e-11		cg21657876	11	72354022	PDE2A	chr11:72353222-72354358	0.325104	0.0517413	0.273362	5.13972e-08	3.25352e-06		cg10019916	1	228000000	WNT3A	chr1:228194096-228196512	0.487288	0.123833	0.363455	1.68508e-13	9.97764e-12		DMRT1|1761	-2.53272	-1.10304	6.70443e-06	1.87472e-05		FCN1|2219	2.10058	0.988072	1.16e-14	4.02e-13		CX3CL1|6376	1.19073	5.4702	1.12e-13	9.7e-13
cg24863175	1	186840433	PLA2G4A		0.774202	0.479839	0.294364	3.30367e-16	2.91023e-14		cg25137204	11	72975404	P2RY6	chr11:72975469-72975797	0.452522	0.20219	0.250332	1.5784e-09	2.33792e-07		cg09511896	1	228000000	WNT3A	chr1:228246631-228247197	0.589868	0.259419	0.330449	4.36211e-13	2.26425e-11		DMRTA2|63950	1.12937	0.620494	0.00130546	0.00260595		FCRL6|343413	1.54867	-0.783361	5.12e-10	6.79e-09		CX3CR1|1524	-1.1705	0.484623	5.67e-12	3.95e-11
cg06805320	1	190447640	FAM5C		0.532784	0.221693	0.311091	4.78338e-11	1.08028e-09		cg26343510	11	72975668	P2RY6	chr11:72975469-72975797	0.576575	0.277342	0.299233	1.37517e-08	1.18271e-06		cg23663760	1	228000000	WNT3A	chr1:228246631-228247197	0.438797	0.185848	0.252949	2.27669e-11	7.14191e-10		DMRTC1B|728656	-1.92979	-1.97386	2.36307e-07	7.92008e-07		FCRLB|127943	1.10124	-0.545552	9.67e-09	9.96e-08		CXCL1|2919	1.08965	6.53242	1.23e-09	6.38e-09
cg24365464	1	190448126	FAM5C		0.558529	0.231148	0.327381	7.75987e-11	1.66627e-09		cg06637774	11	72975702	P2RY6	chr11:72975469-72975797	0.550146	0.231447	0.318699	5.5169e-09	5.93752e-07		cg26841013	1	228000000	WNT3A	chr1:228246631-228247197	0.676644	0.266186	0.410458	4.94915e-10	1.11505e-08		DNAH2|146754	2.36412	2.5424	3.80555e-48	2.80761e-46		FER1L4|80307	-1.02895	3.52654	0.00015482	0.00063438		CXCL10|3627	1.58363	5.54975	1.27e-18	2e-17
cg00321478	1	197238398	CRB1		0.74137	0.470286	0.271083	5.44666e-16	4.53928e-14		cg14864148	11	73053649	ARHGEF17	chr11:73053648-73054302	0.628685	0.361501	0.267184	4.68469e-09	5.25797e-07		cg11176493	1	228000000	WNT3A	chr1:228246631-228247197	0.428505	0.1387	0.289805	5.05059e-10	1.13494e-08		DNAH5|1767	1.01727	0.545589	5.82705e-09	2.3458e-08		FER1L6|654463	-1.17523	3.39959	0.00025846	0.00099806		CXCL11|6373	1.53533	4.68911	5.64e-13	4.45e-12
cg22671471	1	197880384	LHX9	chr1:197880016-197881637	0.565898	0.15825	0.407648	1.8694e-14	1.01659e-12		cg16017089	11	73053830	ARHGEF17	chr11:73053648-73054302	0.641048	0.246078	0.39497	1.16943e-09	1.86395e-07		cg22163199	1	228000000	MRPL55	chr1:228296787-228297276	0.452938	0.190847	0.262091	4.87136e-10	1.09981e-08		DNAJC5B|85479	1.74523	-0.825289	2.53613e-27	4.61571e-26		FGF10|2255	1.35926	-3.13424	7.03e-05	0.00031349		CXCL12|6387	-1.44553	5.21712	1.5e-18	2.33e-17
cg13364881	1	197880513	LHX9	chr1:197880016-197881637	0.548098	0.203153	0.344945	3.0607e-19	6.37974e-17		cg20737388	11	73668626	DNAJB13		0.557892	0.233611	0.324281	5.25299e-11	2.16373e-08		cg09462576	1	228000000	MRPL55	chr1:228296787-228297276	0.693131	0.436667	0.256464	6.8204e-15	6.59717e-13		DNASE1|1773	-1.3508	3.37643	9.58103e-21	1.06646e-19		FGF13|2258	-1.20734	0.832182	3.52e-06	2.12e-05		CXCL14|9547	-2.45946	7.06984	2.88e-23	8.18e-22
cg16353957	1	197880663	LHX9	chr1:197880016-197881637	0.562177	0.18297	0.379207	3.24308e-16	2.86223e-14		cg04044120	11	73668757	DNAJB13		0.746893	0.405052	0.341841	2.20903e-12	2.76861e-09		cg11253514	1	229000000	TRIM17	chr1:228603706-228604567	0.580728	0.307142	0.273586	5.69443e-11	1.60365e-09		DNASE1L3|1776	-1.26415	1.58384	4.67987e-06	1.33644e-05		FGF19|9965	1.82631	2.45941	0.00061242	0.00214674		CXCL17|284340	1.36518	1.01608	0.00048817	0.0011311
cg19704348	1	197880726	LHX9	chr1:197880016-197881637	0.370028	0.0438743	0.326154	4.34618e-10	7.83569e-09		cg04371288	11	75378500	MAP6	chr11:75378416-75379882	0.53622	0.201586	0.334634	1.49801e-09	2.24607e-07		cg01907584	1	229000000	TRIM17	chr1:228603706-228604567	0.642882	0.243627	0.399254	7.02832e-13	3.42171e-11		DNER|92737	1.87736	-1.02436	3.38359e-16	2.71875e-15		FGF20|26281	-1.64833	-0.994085	0.00110075	0.00360345		CXCL3|2921	1.15201	5.36829	1.5e-10	8.82e-10
cg17777738	1	197880850	LHX9	chr1:197880016-197881637	0.421648	0.121191	0.300456	2.75366e-11	6.57607e-10		cg00708380	11	75378502	MAP6	chr11:75378416-75379882	0.532605	0.238393	0.294211	1.46054e-08	1.23909e-06		cg05347845	1	230000000	ACTA1	chr1:229567206-229570684	0.771072	0.481303	0.289769	2.27932e-14	1.83545e-12		DNM3|26052	-1.66	1.46191	2.27735e-21	2.66272e-20		FGF23|8074	-2.3633	-2.13415	1.54e-06	1e-05		CXCL9|4283	1.09167	6.04709	1.29e-08	5.87e-08
cg10897376	1	197880923	LHX9	chr1:197880016-197881637	0.340821	0.0500855	0.290736	3.11552e-09	4.59126e-08		cg06040683	11	75379166	MAP6	chr11:75378416-75379882	0.511838	0.210761	0.301077	1.92043e-08	1.52538e-06		cg04030615	1	230000000	ACTA1	chr1:229567206-229570684	0.659419	0.38421	0.275209	1.65982e-15	1.9942e-13		DNMT3L|29947	-2.26384	-3.32985	4.25445e-07	1.38132e-06		FGF5|2250	1.75452	-2.51796	4.65e-10	6.2e-09		CXCR2P1|3580	1.27938	0.285456	2.11e-09	1.06e-08
cg24085809	1	197881471	LHX9	chr1:197880016-197881637	0.396618	0.0421284	0.35449	9.15317e-11	1.93192e-09		cg19915064	11	75379432	MAP6	chr11:75378416-75379882	0.456136	0.200279	0.255857	1.51771e-06	4.55632e-05		cg11689813	1	230000000	ACTA1	chr1:229567206-229570684	0.688112	0.392532	0.295579	1.82197e-16	3.00867e-14		DOC2B|8447	1.68474	-0.2291	2.72562e-12	1.52501e-11		FGF9|2254	1.34192	0.054374	5.28e-05	0.00024235		CXCR7|57007	-1.45544	4.79239	1.16e-32	1.34e-30
cg13501359	1	197881540	LHX9	chr1:197880016-197881637	0.281537	0.0229727	0.258565	1.20817e-08	1.54856e-07		cg03506033	11	75379864	MAP6	chr11:75378416-75379882	0.599866	0.310008	0.289859	3.61211e-07	1.48545e-05		cg03432338	1	231000000	FAM89A	chr1:231176785-231177009	0.435271	0.111922	0.323349	2.40556e-10	5.82955e-09		DOCK10|55619	1.00662	2.47199	2.13623e-17	1.88627e-16		FGFR1|2260	1.04403	4.56742	3.45e-14	1.09e-12		CXorf27|25763	-3.10397	-2.08393	4.37e-06	1.39e-05
cg08008403	1	197881741	LHX9	chr1:197880016-197881637	0.354673	0.0834119	0.271261	2.18242e-11	5.3382e-10		cg00223767	11	75831715	UVRAG		0.604613	0.228344	0.37627	9.67033e-11	3.21551e-08		cg01328548	1	231000000	TRIM67	chr1:231297812-231299777	0.441241	0.154574	0.286667	2.08369e-12	8.73868e-11		DOCK2|1794	1.41871	3.11953	2.57065e-27	4.67376e-26		FGR|2268	1.71351	2.95332	2.38e-23	4.87e-21		CXorf30|645090	1.50536	-3.37119	0.00040904	0.00095973
cg27225220	1	197881774	LHX9	chr1:197880016-197881637	0.553664	0.176144	0.37752	2.09346e-14	1.12324e-12		cg09467902	11	76750413	B3GNT6	chr11:76750692-76751778	0.704367	0.449893	0.254473	1.25109e-14	1.01921e-10		cg09308842	1	231000000	TRIM67	chr1:231297812-231299777	0.518747	0.1334	0.385347	5.25831e-13	2.6584e-11		DOCK3|1795	1.12742	-0.434558	1.11145e-14	7.80333e-14		FIBCD1|84929	1.4339	4.27252	1.18e-05	6.33e-05		CXorf48|54967	-2.79707	-2.91431	2.63e-07	9.89e-07
cg05527530	1	197882003	LHX9	chr1:197880016-197881637	0.494417	0.184168	0.310249	1.86116e-15	1.33717e-13		cg05476483	11	76750693	B3GNT6	chr11:76750692-76751778	0.52769	0.226314	0.301377	3.79356e-09	4.50065e-07		cg09150076	1	231000000	TRIM67	chr1:231297812-231299777	0.512864	0.125803	0.387061	2.31521e-15	2.66168e-13		DOCK4|9732	1.02657	2.85386	5.51693e-22	6.77902e-21		FLJ12825|440101	1.03378	-1.9537	0.00045896	0.00166662		CXorf49B|100132994	-3.01825	-2.41737	9.02e-06	2.74e-05
cg25212090	1	197882170	LHX9	chr1:197880016-197881637	0.531251	0.215572	0.315679	3.25182e-18	5.07546e-16		cg14708990	11	76839217	MYO7A		0.664658	0.389466	0.275191	5.13838e-12	4.5944e-09		cg13881199	1	231000000	TRIM67	chr1:231297812-231299777	0.486479	0.173711	0.312768	5.68756e-15	5.7007e-13		DOCK5|80005	1.25116	4.51964	2.3616e-39	9.349e-38		FLJ16779|100192386	1.05287	-1.65907	0.00030314	0.00114915		CXorf50B|653687	-1.09498	-0.760948	6.23e-06	1.94e-05
cg15544654	1	197882295	LHX9	chr1:197880016-197881637	0.530994	0.250197	0.280797	7.91983e-11	1.69632e-09		cg11933951	11	82997796	CCDC90B	chr11:82996642-82997536	0.729682	0.473291	0.256391	4.22891e-09	4.86177e-07		cg16387254	1	231000000	C1orf124;EXOC8	chr1:231473012-231474382	0.629608	0.364825	0.264782	9.71796e-08	1.31672e-06		DOCK8|81704	1.28594	3.72222	6.42289e-28	1.20583e-26		FLJ26850|400710	1.02528	-3.07861	0.0050222	0.0137496		CXXC4|80319	-1.12084	-1.21057	5.44e-07	1.96e-06
cg16353006	1	197882469	LHX9	chr1:197880016-197881637	0.657444	0.280194	0.37725	2.88655e-16	2.58021e-14		cg07434402	11	84431535	DLG2		0.606467	0.323641	0.282826	5.41859e-07	2.02774e-05		cg10701282	1	234000000	SLC35F3	chr1:234349884-234350471	0.377007	0.120434	0.256572	6.09947e-09	1.07231e-07		DOK2|9046	1.44244	2.51549	3.1463e-38	1.17765e-36		FLJ30679|146512	1.01648	-2.97164	0.0028735	0.00840954		CYBRD1|79901	-1.12516	6.08743	3.93e-17	5.19e-16
cg02393845	1	197887438	LHX9	chr1:197887088-197887791	0.38503	0.0810944	0.303936	2.18665e-13	8.86172e-12		cg20864389	11	84431970	DLG2		0.475504	0.21219	0.263314	5.65294e-07	2.0991e-05		cg00662647	1	234000000	SLC35F3	chr1:234349884-234350471	0.684745	0.365305	0.31944	4.71409e-10	1.06883e-08		DOK3|79930	1.10222	2.45219	8.84425e-27	1.54204e-25		FLJ32063|150538	-2.76462	2.36352	1.61e-12	3.62e-11		CYP11A1|1583	-1.76347	-1.62407	1.72e-10	1e-09
cg03660500	1	197887649	LHX9	chr1:197887088-197887791	0.471824	0.0691476	0.402677	5.45378e-16	4.54393e-14		cg00846036	11	84634126	DLG2		0.487027	0.21447	0.272557	2.52698e-08	1.89202e-06		cg10467711	1	234000000	SLC35F3	chr1:234349884-234350471	0.616862	0.3473	0.269562	1.62032e-15	1.94994e-13		DPCR1|135656	5.13266	-0.64733	1.70779e-66	4.23483e-64		FLJ35024|401491	-1.14173	-2.40179	5.78e-05	0.00026258		CYP17A1|1586	1.21037	-2.52485	0.00139287	0.00299181
cg20743365	1	197887714	LHX9	chr1:197887088-197887791	0.58233	0.117493	0.464837	1.27271e-16	1.26441e-14		cg24200175	11	85668951	PICALM		0.749848	0.469984	0.279864	4.64138e-12	4.28052e-09		cg26574680	1	236000000	GNG4	chr1:235811841-235814066	0.374023	0.120911	0.253112	2.24198e-08	3.4692e-07		DPEP1|1800	-2.41412	8.39028	2.58317e-21	3.01044e-20		FLJ42875|440556	1.69272	-1.24505	1.17e-07	9.57e-07		CYP19A1|1588	-1.48144	-0.970446	3.13e-12	2.26e-11
cg12444328	1	197887955	LHX9	chr1:197887088-197887791	0.633339	0.289934	0.343405	3.98304e-12	1.16367e-10		cg06549238	11	93277161	C11orf75	chr11:93275814-93276721	0.617512	0.362676	0.254836	3.8728e-05	0.0005802		cg06714284	1	236000000	GNG4	chr1:235811841-235814066	0.439751	0.0246503	0.415101	4.65845e-11	1.34072e-09		DPEP2|64174	1.12906	0.057346	4.11776e-15	3.00689e-14		FLJ43860|389690	-3.23058	-3.18751	9.75e-08	8.14e-07		CYP1A1|1543	2.96194	0.259592	1.06e-09	5.58e-09
cg20329405	1	197888123	LHX9	chr1:197887088-197887791	0.526593	0.2213	0.305292	1.28994e-12	4.26454e-11		cg12532343	11	94501369	AMOTL1	chr11:94501366-94502696	0.560833	0.308032	0.252801	2.29444e-07	1.04735e-05		cg11696475	1	236000000	GNG4	chr1:235811841-235814066	0.366376	0.0343481	0.332028	1.11171e-10	2.91678e-09		DPF1|8193	1.27096	-0.797964	1.37467e-10	6.51708e-10		FLJ44054|643365	3.57445	-3.15336	6.27e-10	8.2e-09		CYP1A2|1544	-6.3917	-0.704291	1.17e-10	6.97e-10
cg05365320	1	200971339	KIF21B	chr1:200969623-200969938	0.847144	0.596855	0.250289	4.99141e-23	2.92772e-20		cg06714320	11	94501384	AMOTL1	chr11:94501366-94502696	0.663537	0.401463	0.262075	6.93326e-06	0.000150775		cg10840412	1	236000000	GNG4	chr1:235811841-235814066	0.506437	0.112426	0.394011	1.03377e-10	2.72742e-09		DPM1|8813	-1.06351	5.90154	1.32658e-37	4.7848e-36		FLNA|2316	1.19331	8.97621	5.52e-17	2.91e-15		CYP1B1|1545	-1.18205	3.85707	1.86e-07	7.11e-07
cg12417362	1	201617355	NAV1	chr1:201617041-201619788	0.559129	0.27977	0.279359	4.5174e-14	2.20257e-12		cg09474081	11	94501387	AMOTL1	chr11:94501366-94502696	0.653092	0.379065	0.274027	4.24529e-06	0.00010239		cg20285514	1	236000000	GNG4	chr1:235811841-235814066	0.42746	0.0353783	0.392082	3.63627e-10	8.46575e-09		DPP10|57628	-1.34262	0.929846	0.00260953	0.00494854		FLNC|2318	1.0983	5.33348	3.92e-08	3.55e-07		CYP26A1|1592	-1.19814	-0.715033	0.00129862	0.00280493
cg13071729	1	201617443	NAV1	chr1:201617041-201619788	0.454039	0.124114	0.329924	3.20951e-14	1.62991e-12		cg08402652	11	94501461	AMOTL1	chr11:94501366-94502696	0.651225	0.350381	0.300844	7.95375e-06	0.000168264		cg18563326	1	236000000	GNG4	chr1:235811841-235814066	0.385896	0.0368964	0.349	1.68367e-09	3.35539e-08		DPP4|1803	1.35568	5.59907	3.20002e-16	2.57589e-15		FLVCR2|55640	1.06252	3.089	7.3e-10	9.44e-09		CYP27A1|1593	-1.19025	5.73654	1.44e-13	1.23e-12
cg14834267	1	201617847	NAV1	chr1:201617041-201619788	0.414676	0.0381577	0.376518	3.96661e-13	1.50221e-11		cg23018873	11	94501467	AMOTL1	chr11:94501366-94502696	0.622426	0.355231	0.267195	2.52532e-05	0.000416287		cg17816394	1	236000000	GNG4	chr1:235811841-235814066	0.515633	0.107268	0.408365	1.68017e-15	2.01429e-13		DPYD|1806	2.03145	2.70429	6.44486e-58	9.47561e-56		FMNL1|752	1.25275	4.18114	1.2e-16	5.93e-15		CYP27C1|339761	-1.49049	-0.369883	1.06e-17	1.49e-16
cg16517702	1	201617853	NAV1	chr1:201617041-201619788	0.442135	0.0411554	0.40098	1.52146e-13	6.44066e-12		cg26705960	11	100999009	PGR	chr11:100998030-100999774	0.445611	0.192635	0.252976	1.07598e-07	5.80391e-06		cg09649610	1	236000000	GNG4	chr1:235811841-235814066	0.542922	0.121321	0.421601	6.07599e-15	6.02007e-13		DPYSL2|1808	1.41411	6.56561	5.62362e-39	2.16856e-37		FMO1|2326	1.40378	-1.40363	5.25e-06	3.04e-05		CYP2A6|1548	-7.39857	2.02698	2.2e-15	2.37e-14
cg05695937	1	201618003	NAV1	chr1:201617041-201619788	0.55091	0.135364	0.415546	2.3357e-15	1.62489e-13		cg25915838	11	100999077	PGR	chr11:100998030-100999774	0.529619	0.270751	0.258868	1.28781e-06	3.99497e-05		cg00043510	1	236000000	GNG4	chr1:235814280-235814488	0.633345	0.159987	0.473357	4.03732e-16	5.91138e-14		DPYSL4|10570	1.04094	-0.948183	7.93388e-10	3.48466e-09		FMO2|2327	2.39796	-0.760546	2.46e-17	1.37e-15		CYP2A7|1549	-2.12087	-2.25753	0.00012282	0.00031301
cg09358973	1	201618030	NAV1	chr1:201617041-201619788	0.567338	0.205794	0.361544	9.33264e-16	7.32024e-14		cg22299741	11	101000164	PGR	chr11:100999946-101000437	0.462267	0.189006	0.273261	1.47447e-08	1.24837e-06		cg02780849	1	236000000	GNG4	chr1:235814280-235814488	0.520825	0.113546	0.407279	7.47408e-14	5.0171e-12		DPYSL5|56896	1.41015	-2.75758	8.037e-07	2.52539e-06		FMO5|2330	-1.12454	3.94396	2.29e-09	2.67e-08		CYP2B6|1555	-2.39871	4.83251	1.31e-16	1.62e-15
cg14920846	1	201618209	NAV1	chr1:201617041-201619788	0.620514	0.291159	0.329356	9.45096e-18	1.27086e-15		cg14933485	11	101000436	PGR	chr11:100999946-101000437	0.438051	0.120549	0.317502	1.04602e-09	1.71669e-07		cg24454695	1	236000000	GNG4	chr1:235814280-235814488	0.572267	0.263592	0.308675	2.38111e-15	2.72815e-13		DRD1|1812	-1.65549	-1.0773	5.47223e-08	1.98539e-07		FN1|2335	1.87912	9.43621	9.1e-21	1.09e-18		CYP2B7P1|1556	-1.83723	0.0167743	1e-11	6.77e-11
cg19827875	1	201618284	NAV1	chr1:201617041-201619788	0.822653	0.518054	0.304599	3.97912e-20	1.05815e-17		cg05082609	11	105692831	GRIA4		0.788585	0.530955	0.25763	3.12915e-10	7.17517e-08		cg22941646	1	236000000	GNG4	chr1:235814280-235814488	0.61297	0.200981	0.411989	1.03561e-14	9.43818e-13		DRD2|1813	-4.05906	2.70969	3.81918e-28	7.26172e-27		FNDC1|84624	1.68372	4.22967	5.31e-13	1.31e-11		CYP2C18|1562	1.01351	2.39708	8.91e-06	2.71e-05
cg00313914	1	201618901	NAV1	chr1:201617041-201619788	0.455992	0.16713	0.288862	5.39477e-12	1.52438e-10		cg16208507	11	107798913	RAB39	chr11:107798958-107799980	0.484881	0.168612	0.316268	4.63119e-09	5.21789e-07		cg13455717	1	236000000	GNG4	chr1:235814280-235814488	0.61113	0.199848	0.411282	2.44369e-13	1.37584e-11		DRD5|1816	1.58215	-2.26156	2.87772e-05	7.37247e-05		FOLH1|2346	1.58304	1.18572	7.22e-12	1.42e-10		CYP2C8|1558	-5.17365	1.80637	3.11e-19	5.33e-18
cg03046819	1	201858339	SHISA4		0.478419	0.22775	0.250669	1.52086e-09	2.41739e-08		cg08179907	11	107798967	RAB39	chr11:107798958-107799980	0.478889	0.212407	0.266482	1.98458e-09	2.78217e-07		cg06173536	1	236000000	GNG4	chr1:235814280-235814488	0.632712	0.19635	0.436361	1.31985e-13	8.11486e-12		DRGX|644168	3.23094	-2.67585	1.13225e-16	9.47732e-16		FOLH1B|219595	2.00507	-1.1961	4.77e-06	2.79e-05		CYP2C9|1559	-2.88012	2.39573	1.35e-08	6.1e-08
cg12730843	1	201915899	LMOD1		0.442402	0.145748	0.296654	7.48133e-15	4.53138e-13		cg02888906	11	107798972	RAB39	chr11:107798958-107799980	0.410722	0.138282	0.27244	3.13576e-08	2.22311e-06		cg11228876	1	236000000	NID1	chr1:236227682-236228817	0.421425	0.155189	0.266236	5.26686e-12	1.9687e-10		DSCAM|1826	-1.01409	-3.34002	0.00128022	0.0025593		FOLR1|2348	-3.80294	1.98024	6.66e-20	6.54e-18		CYP2E1|1571	-4.13745	3.86898	1.81e-16	2.21e-15
cg16903217	1	201915950	LMOD1		0.379117	0.121686	0.257431	2.53853e-12	7.78114e-11		cg24251048	11	107799072	RAB39	chr11:107798958-107799980	0.460727	0.0998096	0.360917	5.3969e-10	1.06873e-07		cg07479670	1	236000000	NID1	chr1:236227682-236228817	0.64269	0.266465	0.376225	1.30462e-13	8.04658e-12		DSCR6|53820	-2.61961	0.758033	1.06876e-23	1.48843e-22		FOLR3|2352	1.11759	-2.75095	0.00808036	0.0208234		CYP2W1|54905	-1.20267	5.08207	0.00045199	0.00105371
cg16966962	1	201915989	LMOD1		0.465109	0.084958	0.380151	3.63966e-15	2.39785e-13		cg09284707	11	107799080	RAB39	chr11:107798958-107799980	0.496399	0.151985	0.344415	9.64327e-10	1.62257e-07		cg09225230	1	237000000	EDARADD	chr1:236558459-236559336	0.480585	0.109751	0.370834	5.13337e-17	1.06546e-14		DSCR8|84677	-2.19574	-1.96331	0.00130264	0.00260062		FOSL1|8061	1.42003	4.6872	1.99e-11	3.56e-10		CYP39A1|51302	-1.1794	3.13079	3.14e-11	2e-10
cg02970525	1	201915999	LMOD1		0.565568	0.128076	0.437492	1.95716e-18	3.26315e-16		cg09974136	11	107799091	RAB39	chr11:107798958-107799980	0.39603	0.0755976	0.320432	3.55798e-09	4.2861e-07		cg14615868	1	237000000	EDARADD	chr1:236558459-236559336	0.444321	0.107375	0.336946	1.52911e-17	3.92004e-15		DSG1|1828	-1.08274	-0.886441	2.16092e-08	8.19303e-08		FOXC1|2296	1.51821	2.89274	9.88e-11	1.52e-09		CYP3A4|1576	-2.7033	2.46311	1.22e-09	6.38e-09
cg10327424	1	202611933	SYT2	chr1:202611668-202613039	0.443097	0.0928409	0.350256	6.60926e-13	2.35608e-11		cg08482682	11	107799197	RAB39	chr11:107798958-107799980	0.506651	0.146721	0.35993	7.68919e-09	7.61843e-07		cg23875264	1	237000000	EDARADD	chr1:236558459-236559336	0.476217	0.153947	0.32227	2.02975e-18	7.59281e-16		DTHD1|401124	1.41981	-2.39992	2.48467e-08	9.3688e-08		FOXD1|2297	1.91668	2.84299	6.25e-11	1e-09		CYP3A7|1551	-1.70605	-0.145793	2.44e-08	1.06e-07
cg15586779	1	202612132	SYT2	chr1:202611668-202613039	0.380023	0.116567	0.263456	8.13312e-09	1.08672e-07		cg03154536	11	107799237	RAB39	chr11:107798958-107799980	0.43455	0.16563	0.26892	2.46202e-09	3.24668e-07		cg23020486	1	237000000	EDARADD	chr1:236558459-236559336	0.47804	0.154882	0.323158	6.05192e-18	1.83545e-15		DTNA|1837	-1.37023	1.54639	4.06804e-10	1.84436e-09		FOXD3|27022	2.63439	-2.56371	6.24e-11	9.98e-10		CYP4A11|1579	-8.14107	1.81771	5.09e-19	8.41e-18
cg16899351	1	202679089	SYT2	chr1:202678881-202679769	0.609627	0.35074	0.258886	5.32792e-12	1.50738e-10		cg05090725	11	107799287	RAB39	chr11:107798958-107799980	0.435631	0.155388	0.280243	1.36165e-09	2.09079e-07		cg02327465	1	237000000	EDARADD	chr1:236558459-236559336	0.495957	0.186134	0.309823	2.713e-14	2.12288e-12		DUSP15|128853	-1.90801	1.96	1.71943e-16	1.41665e-15		FOXG1|2290	-2.55118	-1.98853	5.83e-05	0.00026485		CYP4A22|284541	-5.74026	-1.65751	2.78e-09	1.38e-08
cg23278267	1	202679165	SYT2	chr1:202678881-202679769	0.372523	0.102603	0.269919	2.43209e-08	2.8989e-07		cg05842391	11	110166535	RDX	chr11:110166564-110167759	0.447128	0.103783	0.343345	5.37108e-09	5.8176e-07		cg15748490	1	240000000	FMN2	chr1:240254959-240257063	0.477828	0.108721	0.369106	8.09273e-14	5.35394e-12		DUSP27|92235	-1.0771	5.63778	0.0121272	0.0204321		FOXI1|2299	-1.38897	-0.268146	0.00309453	0.00899129		CYP4F2|8529	-1.93366	3.10626	5.85e-10	3.17e-09
cg05127456	1	202679456	SYT2	chr1:202678881-202679769	0.544114	0.182537	0.361577	7.34662e-26	8.06962e-23		cg23352579	11	110166753	RDX	chr11:110166564-110167759	0.317947	0.0372983	0.280648	3.89379e-08	2.62216e-06		cg19591056	1	240000000	FMN2	chr1:240254959-240257063	0.532764	0.169065	0.363699	1.46705e-13	8.8602e-12		DUSP4|1846	3.30584	4.8905	6.72857e-94	7.50825e-91		FOXL2|668	2.12156	-2.96593	1.93e-06	1.23e-05		CYP7A1|1581	-2.8088	-2.72096	2.94e-08	1.27e-07
cg22594309	1	202679504	SYT2	chr1:202678881-202679769	0.523942	0.188679	0.335263	4.43206e-20	1.16471e-17		cg02535507	11	110166799	RDX	chr11:110166564-110167759	0.328755	0.0659912	0.262763	3.65743e-09	4.37811e-07		cg01535698	1	240000000	FMN2	chr1:240254959-240257063	0.478957	0.141352	0.337605	1.80803e-16	2.9907e-14		DUSP5|1847	1.33594	4.65409	2.28997e-26	3.87904e-25		FOXN1|8456	-2.03793	-2.02377	4.06e-10	5.47e-09		CYP7B1|9420	-1.22679	0.762017	3e-13	2.45e-12
cg05752786	1	202679755	SYT2	chr1:202678881-202679769	0.514704	0.194196	0.320508	5.59513e-18	8.11531e-16		cg09715738	11	110167556	RDX	chr11:110166564-110167759	0.385984	0.0276002	0.358384	2.08346e-09	2.88903e-07		cg02574509	1	240000000	FMN2	chr1:240254959-240257063	0.492893	0.171033	0.32186	2.90272e-16	4.46407e-14		DUSP5P|574029	1.67259	-1.15422	2.43176e-14	1.65271e-13		FOXP2|93986	-1.07234	0.426509	0.00083787	0.0028272		CYP8B1|1582	-6.88806	1.75748	1e-21	2.32e-20
cg16315376	1	202679762	SYT2	chr1:202678881-202679769	0.575252	0.296593	0.278659	2.01965e-15	1.43543e-13		cg15496005	11	110167562	RDX	chr11:110166564-110167759	0.377483	0.0405738	0.336909	3.84434e-09	4.54218e-07		cg25208017	1	240000000	FMN2	chr1:240254959-240257063	0.60361	0.236143	0.367467	7.55817e-14	5.05964e-12		DUX4|22947	-2.43255	-2.37616	4.05935e-05	0.000101892		FPR1|2357	1.77336	2.96616	4.84e-12	9.83e-11		CYR61|3491	-1.21561	7.04083	1e-14	9.86e-14
cg08925398	1	202937011	CYB5R1	chr1:202936045-202936252	0.342047	0.042001	0.300046	1.392e-10	2.81933e-09		cg25166381	11	110167568	RDX	chr11:110166564-110167759	0.317113	0.0407136	0.276399	1.59718e-08	1.32551e-06		cg00816406	1	240000000	FMN2		0.67122	0.391231	0.279989	1.22107e-10	3.17165e-09		DYDC2|84332	-1.32591	-2.08017	0.00290844	0.0054741		FPR2|2358	1.91864	1.32037	2.03e-09	2.39e-08		CYS1|192668	-1.85619	2.00194	1.68e-37	4.77e-35
cg18275051	1	202937114	CYB5R1	chr1:202936045-202936252	0.534011	0.139056	0.394955	9.37902e-18	1.26524e-15		cg09331704	11	110167585	RDX	chr11:110166564-110167759	0.412816	0.0861299	0.326686	3.88747e-08	2.61972e-06		cg09107161	1	241000000	GREM2		0.630432	0.277855	0.352577	7.90864e-17	1.51497e-14		DYNLRB1|83658	-1.05959	7.34615	1.29961e-38	4.90556e-37		FPR3|2359	1.61985	3.98368	8.9e-20	8.55e-18		D4S234E|27065	-1.01386	1.37979	1.42e-06	4.82e-06
cg01798157	1	203276595	BTG2	chr1:203274305-203275338	0.685513	0.276046	0.409468	3.22433e-19	6.67729e-17		cg00626438	11	110167591	RDX	chr11:110166564-110167759	0.36597	0.103327	0.262643	2.27954e-07	1.04328e-05		cg07808348	1	241000000	GREM2		0.387749	0.0484981	0.339251	9.25162e-09	1.55882e-07		DYNLRB2|83657	-1.04483	-3.20635	0.000855838	0.00176038		FREM2|341640	-2.85662	1.17773	6.14e-12	1.23e-10		DAAM2|23500	-1.40535	3.67084	3.38e-34	4.81e-32
cg04148762	1	203598573	ATP2B4	chr1:203598471-203598853	0.472839	0.107987	0.364851	6.55837e-17	7.00186e-15		cg07981475	11	110167594	RDX	chr11:110166564-110167759	0.456588	0.141853	0.314734	3.21991e-07	1.36148e-05		cg00155397	1	241000000	GREM2		0.367975	0.0838876	0.284087	5.5405e-10	1.23145e-08		DZIP1L|199221	1.4847	0.25894	3.69475e-38	1.37716e-36		FRMD1|79981	-1.71983	2.4212	1.37e-08	1.36e-07		DAB1|1600	-1.37949	-1.45017	6.37e-07	2.28e-06
cg17721249	1	203598594	ATP2B4	chr1:203598471-203598853	0.513003	0.116153	0.39685	3.60143e-14	1.8021e-12		cg17015511	11	110167602	RDX	chr11:110166564-110167759	0.468037	0.133888	0.334149	9.73819e-08	5.37011e-06		cg06353127	1	241000000	GREM2		0.315994	0.0456727	0.270321	4.43173e-10	1.01075e-08		EBF2|64641	1.33933	-2.67954	1.15213e-11	6.04295e-11		FRMD5|84978	1.13024	2.42572	1.34e-08	1.33e-07		DAB2|1601	-1.15905	6.23881	4.48e-29	2.85e-27
cg26253438	1	203598623	ATP2B4	chr1:203598471-203598853	0.492707	0.150601	0.342106	5.96885e-18	8.58607e-16		cg11567172	11	110167690	RDX	chr11:110166564-110167759	0.416943	0.124941	0.292001	2.94877e-08	2.12065e-06		cg19356905	1	241000000	GREM2		0.404835	0.0854009	0.319434	4.59121e-11	1.32346e-09		EDA|1896	-1.76481	3.25914	5.2993e-12	2.87405e-11		FRMD6|122786	1.33786	3.30063	2.41e-18	1.64e-16		DACH1|1602	-1.4309	4.88685	1.51e-11	1e-10
cg15732851	1	203598761	ATP2B4	chr1:203598471-203598853	0.701601	0.143213	0.558388	2.10208e-20	6.09179e-18		cg01015879	11	110167749	RDX	chr11:110166564-110167759	0.376507	0.0846044	0.291902	8.17302e-08	4.67224e-06		cg11679177	1	242000000	RGS7	chr1:241520103-241520790	0.566402	0.269855	0.296547	6.42634e-11	1.78559e-09		EDA2R|60401	-1.28708	0.770034	8.61954e-08	3.04257e-07		FRZB|2487	-3.05681	4.38912	5.26e-30	9.35e-27		DACH2|117154	-3.32393	-2.62598	2.96e-15	3.13e-14
cg21397588	1	203598954	ATP2B4	chr1:203598471-203598853	0.505973	0.147005	0.358969	2.44279e-17	2.94699e-15		cg21406100	11	110582247	ARHGAP20	chr11:110581839-110583883	0.594246	0.332486	0.26176	2.19215e-07	1.0109e-05		cg14156405	1	242000000	RGS7	chr1:241520103-241520790	0.343386	0.0743959	0.26899	4.02238e-07	4.7441e-06		EDN1|1906	-1.12667	4.36699	1.16378e-12	6.74177e-12		FSCN1|6624	1.6966	6.91928	8.64e-18	5.32e-16		DACT1|51339	-1.3433	4.28226	3.72e-22	9.07e-21
cg02457623	1	203599089	ATP2B4	chr1:203598471-203598853	0.429813	0.101728	0.328085	5.38489e-15	3.39991e-13		cg23632529	11	110582910	ARHGAP20	chr11:110581839-110583883	0.613585	0.328352	0.285233	4.72485e-08	3.04613e-06		cg05940691	1	242000000	WDR64		0.888226	0.593591	0.294635	3.17058e-16	4.82289e-14		EFCAB5|374786	-1.45514	-1.21815	4.90457e-15	3.5495e-14		FSTL3|10272	1.49502	4.83078	2.16e-16	1.01e-14		DACT3|147906	-1.88425	2.81304	7.12e-39	2.79e-36
cg04913057	1	204120825	ETNK2	chr1:204120398-204121109	0.476804	0.0235686	0.453236	3.2732e-18	5.10069e-16		cg14906390	11	113930251	ZBTB16	chr11:113929633-113932190	0.459189	0.147298	0.311892	7.68101e-07	2.66209e-05		cg19205994	1	243000000	PLD5	chr1:242687922-242688682	0.496458	0.213845	0.282614	1.50887e-12	6.59881e-11		EFNA5|1946	1.72713	1.72435	3.81408e-20	4.0752e-19		FUT9|10690	3.87887	-3.02956	1.02e-07	8.47e-07		DAO|1610	-3.14363	-1.57919	8.05e-11	4.88e-10
cg21537214	1	204135585	REN		0.537712	0.28676	0.250952	1.0904e-13	4.78941e-12		cg01439566	11	113932189	ZBTB16	chr11:113929633-113932190	0.488416	0.22302	0.265397	6.56581e-10	1.23356e-07		cg03284440	1	245000000	KIF26B	chr1:245316547-245320247	0.357965	0.0722288	0.285736	1.28697e-09	2.63279e-08		EGLN3|112399	1.43258	5.71914	1.76629e-34	5.15282e-33		FUZ|80199	-1.14683	2.14798	4.01e-08	3.63e-07		DARC|2532	-1.87254	3.641	3.31e-17	4.41e-16
cg03127388	1	204195149	PLEKHA6		0.768377	0.438807	0.32957	1.27459e-15	9.64164e-14		cg18455739	11	114266901	C11orf71	chr11:114270799-114271690	0.812729	0.507416	0.305313	2.54219e-12	3.0063e-09		cg02054059	1	245000000	KIF26B	chr1:245316547-245320247	0.349415	0.0679509	0.281464	3.97658e-10	9.16276e-09		EIF4E3|317649	1.01972	4.30038	8.79348e-23	1.13603e-21		FXYD4|53828	1.19643	-0.572991	0.00341224	0.00980069		DAZ1|1617	-4.29675	2.37489	1.38e-06	4.69e-06
cg03027354	1	204654648	LRRN2	chr1:204654132-204654885	0.319494	0.0639255	0.255569	9.05021e-09	1.19581e-07		cg16764494	11	117667862	DSCAML1	chr11:117666634-117668141	0.542958	0.226843	0.316115	1.05934e-06	3.42723e-05		cg18278247	1	245000000	KIF26B	chr1:245316547-245320247	0.457284	0.129928	0.327356	1.57934e-08	2.52644e-07		EIF6|3692	-1.12602	8.59518	6.18625e-40	2.52168e-38		FZD10|11211	1.12286	1.16162	0.00131677	0.00422121		DAZ2|57055	-4.0925	-1.06007	1.51e-06	5.11e-06
cg17042926	1	204797566	NFASC	chr1:204797610-204797930	0.423006	0.0664393	0.356567	4.80699e-16	4.07331e-14		cg21014159	11	117668035	DSCAML1	chr11:117666634-117668141	0.476854	0.197889	0.278965	2.73561e-07	1.19619e-05		cg06059663	1	245000000	KIF26B	chr1:245316547-245320247	0.328182	0.0730326	0.255149	1.8574e-07	2.36101e-06		ELAVL2|1993	-2.02932	0.681491	2.45945e-10	1.13671e-09		FZD9|8326	-1.77633	0.737757	2.19e-06	1.38e-05		DAZ3|57054	-4.68243	-0.672891	7.25e-07	2.56e-06
cg24085946	1	204797839	NFASC	chr1:204797610-204797930	0.506663	0.12636	0.380303	4.73935e-19	9.39146e-17		cg21640587	11	117668038	DSCAML1	chr11:117666634-117668141	0.448271	0.166955	0.281316	3.72866e-07	1.52196e-05		cg01134643	10	5406948	UCN3		0.578085	0.325456	0.252629	5.65321e-09	1.00251e-07		ELAVL4|1996	1.22145	-2.60119	6.00398e-08	2.16293e-07		G0S2|50486	1.43167	3.63436	2.65e-12	5.71e-11		DBC1|1620	-1.31128	-0.704375	4.01e-06	1.28e-05
cg22571530	1	204797929	NFASC	chr1:204797610-204797930	0.510294	0.192474	0.31782	3.23136e-18	5.04891e-16		cg11333886	11	117668042	DSCAML1	chr11:117666634-117668141	0.56187	0.245035	0.316836	5.58735e-09	5.98698e-07		cg12428514	10	5407119	UCN3		0.635874	0.354532	0.281342	1.55504e-08	2.49211e-07		ELF5|2001	-4.26856	1.96887	1.96016e-16	1.60682e-15		GABBR2|9568	1.04787	-2.86811	0.00109495	0.00358776		DBH|1621	-1.77977	-0.157124	1.04e-06	3.61e-06
cg15460899	1	205039083	CNTN2	chr1:205038784-205039153	0.830094	0.523188	0.306906	1.3616e-13	5.83551e-12		cg04142864	11	118480576	PHLDB1	chr11:118478235-118481896	0.501901	0.205836	0.296065	1.47588e-07	7.41545e-06		cg25988034	10	8093239	FLJ45983	chr10:8091374-8098329	0.67539	0.34315	0.332239	2.82755e-18	9.96696e-16		ELFN2|114794	1.73622	0.164189	6.98947e-13	4.13623e-12		GABRA3|2556	-1.5697	-1.8233	0.00979092	0.0245035		DBX1|120237	-1.13841	-3.38348	0.00123551	0.00267785
cg04105597	1	205585639	ELK4		0.694233	0.428039	0.266194	7.00559e-09	9.50354e-08		cg17466841	11	119181442	MCAM	chr11:119181396-119181670	0.861087	0.609229	0.251858	2.80174e-10	6.58927e-08		cg03672342	10	8094093	FLJ45983	chr10:8091374-8098329	0.705709	0.230313	0.475396	8.61776e-24	3.67156e-20		ELMOD1|55531	1.21836	-3.03461	7.35616e-10	3.24529e-09		GABRB2|2561	-1.50659	0.934062	0.00107902	0.00354471		DCAF12L2|340578	-2.55819	-2.92577	2.84e-14	2.63e-13
cg16031515	1	205743344	RAB7L1	chr1:205743900-205744668	0.789537	0.410535	0.379003	4.46798e-28	7.57428e-25		cg08070028	11	119234956	USP2	chr11:119234480-119235214	0.372839	0.113673	0.259166	3.11143e-06	8.01994e-05		cg25536137	10	8094142	FLJ45983	chr10:8091374-8098329	0.471406	0.17627	0.295136	5.00664e-16	7.10366e-14		ELOVL3|83401	2.48033	-1.40415	9.31174e-44	5.17918e-42		GABRB3|2562	1.99178	1.3575	3.85e-05	0.00018256		DCAF4L2|138009	-3.15301	-2.89167	1.31e-05	3.88e-05
cg26418147	1	205743515	RAB7L1	chr1:205743900-205744668	0.468714	0.109911	0.358803	2.14056e-17	2.61791e-15		cg04976484	11	119292885	THY1	chr11:119292689-119292891	0.465837	0.211044	0.254794	1.34749e-08	1.16712e-06		cg00779924	10	8094641	FLJ45983	chr10:8091374-8098329	0.624358	0.318356	0.306002	5.21476e-13	2.63775e-11		EMID1|129080	-1.50541	3.26484	6.9406e-21	7.79846e-20		GABRP|2568	1.14931	4.37526	0.00075656	0.00257877		DCHS1|8642	-1.36451	5.48328	1.81e-34	2.64e-32
cg16032102	1	206680459	RASSF5	chr1:206680236-206681444	0.429931	0.122237	0.307694	1.87997e-10	3.69388e-09		cg24894970	11	122655638	UBASH3B		0.730694	0.469046	0.261648	4.88759e-07	1.87203e-05		cg19657198	10	8095121	FLJ45983	chr10:8091374-8098329	0.585069	0.24976	0.335309	6.28057e-13	3.10352e-11		EMILIN3|90187	-1.09204	-0.565602	9.45461e-08	3.32288e-07		GABRR1|2569	-3.00798	-1.95769	4.19e-08	3.78e-07		DCLK1|9201	-1.50215	1.34557	2.93e-13	2.4e-12
cg15153976	1	207230464	PFKFB2	chr1:207226281-207226842	0.641438	0.338219	0.303219	6.42385e-12	1.77732e-10		cg08148209	11	125034316	PKNOX2	chr11:125034243-125034495	0.467257	0.116325	0.350932	8.73269e-10	1.50919e-07		cg24797840	10	8095173	FLJ45983;GATA3	chr10:8091374-8098329	0.551517	0.176521	0.374996	1.82594e-13	1.07187e-11		EMP3|2014	1.1477	4.04152	3.95657e-30	8.6147e-29		GAD1|2571	1.23869	2.79417	8.26e-08	7.06e-07		DCN|1634	-1.52971	8.40942	8.49e-28	4.49e-26
cg04439623	1	207627601	CR2	chr1:207627531-207628280	0.336533	0.0417997	0.294733	4.00365e-08	4.53157e-07		cg05063138	11	125034435	PKNOX2	chr11:125034243-125034495	0.507014	0.139709	0.367304	8.46389e-10	1.48866e-07		cg05721515	10	8095288	FLJ45983;GATA3	chr10:8091374-8098329	0.551364	0.149905	0.40146	2.23466e-13	1.2743e-11		EMR1|2015	1.40369	-0.272327	1.49579e-12	8.57882e-12		GAGE1|2543	3.47804	-1.85254	2.08e-05	0.00010527		DCX|1641	-1.67863	-2.37655	1.55e-07	5.99e-07
cg10993336	1	207627941	CR2	chr1:207627531-207628280	0.481144	0.133143	0.348001	2.3217e-12	7.17868e-11		cg27598621	11	125034439	PKNOX2	chr11:125034243-125034495	0.416639	0.143783	0.272856	3.83494e-10	8.30035e-08		cg06870728	10	8095363	FLJ45983;GATA3	chr10:8091374-8098329	0.594178	0.19961	0.394567	4.01241e-13	2.10584e-11		EMR3|84658	1.02106	-1.12397	2.20368e-05	5.73954e-05		GAGE10|643832	4.21575	-3.07076	8.05e-08	6.89e-07		DDAH2|23564	-1.14421	6.45316	5.9e-27	2.72e-25
cg05831823	1	207627978	CR2	chr1:207627531-207628280	0.431593	0.0972776	0.334316	2.22142e-11	5.42365e-10		cg20879576	11	125034747	PKNOX2	chr11:125034896-125036426	0.411515	0.143529	0.267987	5.55429e-08	3.4667e-06		cg13543854	10	8095477	FLJ45983;GATA3	chr10:8091374-8098329	0.514794	0.141937	0.372857	8.00745e-14	5.30803e-12		EMR4P|326342	1.03514	-1.73786	1.55381e-06	4.70677e-06		GAGE12D|100132399	3.3699	-0.606596	0.00016639	0.00067584		DDIT4L|115265	-1.94993	0.11646	6.87e-18	9.87e-17
cg06531007	1	207628110	CR2	chr1:207627531-207628280	0.396761	0.0903425	0.306418	2.08265e-10	4.05033e-09		cg00914022	11	125035218	PKNOX2	chr11:125034896-125036426	0.531371	0.239424	0.291946	3.31156e-07	1.38981e-05		cg06022942	10	8095484	FLJ45983;GATA3	chr10:8091374-8098329	0.453647	0.097699	0.355948	1.93992e-14	1.59678e-12		EMX1|2016	3.16266	0.150202	4.45697e-26	7.4023e-25		GAGE12J|729396	5.28288	-0.879701	1.38e-08	1.37e-07		DDO|8528	-1.22726	1.2393	6.82e-09	3.22e-08
cg00247489	1	207628182	CR2	chr1:207627531-207628280	0.335199	0.054645	0.280554	1.11895e-08	1.44482e-07		cg15184602	11	125365808	FEZ1	chr11:125365137-125366319	0.484474	0.213435	0.271039	1.77361e-06	5.14855e-05		cg07907745	10	8095493	FLJ45983;GATA3	chr10:8091374-8098329	0.509031	0.185909	0.323123	1.49067e-14	1.2828e-12		EMX2|2018	-3.53951	-0.707056	2.82001e-08	1.05575e-07		GAGE2A|729447	3.60796	-2.03394	1.25e-05	6.65e-05		DDR2|4921	-1.56531	3.24171	1.92e-23	5.56e-22
cg23810846	1	207628383	CR2	chr1:207627531-207628280	0.455569	0.20521	0.250359	1.02168e-08	1.33336e-07		cg23514374	11	128372328	ETS1		0.762714	0.457746	0.304968	6.09317e-10	1.16113e-07		cg11018337	10	8095495	FLJ45983;GATA3	chr10:8091374-8098329	0.446485	0.0925904	0.353895	1.45624e-13	8.81718e-12		EMX2OS|196047	-3.02727	-0.449045	7.86254e-09	3.12785e-08		GAGE2B|645037	3.71031	-2.29219	2e-05	0.00010147		DDX27|55661	-1.04171	6.63019	3.41e-26	1.36e-24
cg14201291	1	208274624	PLXNA2		0.822797	0.540855	0.281941	5.00143e-12	1.42477e-10		cg26503877	11	128391429	ETS1	chr11:128391712-128392611	0.584781	0.313154	0.271627	2.5406e-06	6.84768e-05		cg07516470	10	8095651	FLJ45983;GATA3	chr10:8091374-8098329	0.374764	0.121743	0.253021	4.04916e-11	1.1861e-09		ENAM|10117	-1.77566	-3.1645	1.26376e-05	3.40989e-05		GAGE2C|2574	4.77228	-2.68775	8.98e-09	9.31e-08		DDX53|168400	-3.18066	-2.37576	8.11e-06	2.48e-05
cg10382148	1	209954182	TRAF3IP3	chr1:209957721-209958167	0.697661	0.427413	0.270247	5.40056e-12	1.52558e-10		cg22235873	11	128562143	FLI1	chr11:128562671-128565011	0.54954	0.295819	0.253721	2.72871e-08	2.00316e-06		cg01166071	10	8095687	FLJ45983;GATA3	chr10:8091374-8098329	0.474461	0.135021	0.33944	2.07693e-12	8.71408e-11		ENGASE|64772	-1.66706	6.68223	7.67229e-50	6.17032e-48		GAGE2D|729408	2.29236	-1.26806	0.00518346	0.0141475		DEFA5|1670	1.44537	6.2364	0.0037683	0.00743242
cg00097452	1	211306365	KCNH1	chr1:211306667-211307675	0.48659	0.200097	0.286493	3.77511e-15	2.47685e-13		cg20696988	11	130013979	APLP2		0.620307	0.319624	0.300683	7.13461e-12	5.70263e-09		cg22647713	10	8095697	FLJ45983;GATA3	chr10:8091374-8098329	0.436457	0.120992	0.315466	6.21587e-12	2.27331e-10		ENO2|2026	1.84376	4.90376	1.72755e-65	3.95431e-63		GAGE2E|26749	3.47498	-2.86434	3.05e-05	0.00014777		DEFA6|1671	2.58981	4.9767	3.41e-09	1.67e-08
cg22197787	1	211306986	KCNH1	chr1:211306667-211307675	0.369617	0.104668	0.26495	4.65576e-12	1.33407e-10		cg22186291	11	130014056	APLP2		0.725696	0.37248	0.353216	1.66908e-13	5.09897e-10		cg23943136	10	8095755	FLJ45983;GATA3	chr10:8091374-8098329	0.466458	0.115176	0.351282	9.57031e-12	3.3208e-10		ENPP3|5169	-3.1116	4.2693	2.03415e-26	3.48204e-25		GAGE4|2576	2.46897	-1.70372	0.0015316	0.00483499		DEFB1|1672	-1.70012	1.58488	8.57e-09	4e-08
cg23086161	1	211307217	KCNH1	chr1:211306667-211307675	0.58351	0.224928	0.358583	3.42895e-20	9.26584e-18		cg25412310	11	130014702	APLP2		0.781569	0.529626	0.251943	4.18516e-11	1.85971e-08		cg08707112	10	8095764	FLJ45983;GATA3	chr10:8091374-8098329	0.480358	0.204558	0.275801	1.77085e-12	7.59169e-11		ENPP7|339221	1.6781	-2.91158	2.47966e-08	9.35191e-08		GAGE8|100101629	3.6609	-2.21896	1.95e-05	9.92e-05		DEFB103B|414325	1.20785	-2.82221	0.0172737	0.0297506
cg02752882	1	211307220	KCNH1	chr1:211306667-211307675	0.558722	0.219739	0.338984	1.27035e-16	1.26293e-14		cg27478700	11	130298435	ADAMTS8	chr11:130297401-130298517	0.442603	0.141805	0.300798	9.12934e-08	5.10081e-06		cg17566118	10	8095797	FLJ45983;GATA3	chr10:8091374-8098329	0.538698	0.155124	0.383575	5.56498e-12	2.06461e-10		ENTHD1|150350	1.21146	-2.44442	1.41617e-07	4.88115e-07		GALNT14|79623	1.44391	-0.580195	2.4e-05	0.0001196		DEPDC1|55635	1.22317	4.13722	3.42e-30	2.65e-28
cg09084829	1	211307408	KCNH1	chr1:211306667-211307675	0.555953	0.148054	0.407899	9.99704e-19	1.79211e-16		cg14567043	12	1940547	CACNA2D4;LRTM2		0.578331	0.283898	0.294433	7.92194e-11	2.80588e-08		cg18187680	10	8095825	FLJ45983;GATA3	chr10:8091374-8098329	0.451556	0.181194	0.270362	4.52165e-11	1.30649e-09		ENTPD3|956	1.92158	-0.303807	1.57295e-21	1.86353e-20		GALNT4|8693	-1.14754	7.02116	1.18e-13	3.27e-12		DES|1674	-2.80603	8.56992	1.71e-16	2.09e-15
cg06582752	1	211307674	KCNH1	chr1:211306667-211307675	0.462763	0.055898	0.406865	4.86232e-14	2.35003e-12		cg11957400	12	2017093	CACNA2D4	chr12:2017133-2018161	0.715342	0.350182	0.365161	1.05507e-09	1.7273e-07		cg26292521	10	8095831	FLJ45983;GATA3	chr10:8091374-8098329	0.368991	0.100129	0.268862	2.00411e-10	4.94829e-09		EOMES|8320	2.09599	-0.433446	1.41467e-29	2.98551e-28		GALNT8|26290	-2.55437	4.39611	6.26e-16	2.69e-14		DFNA5|1687	-1.10767	2.63002	2.27e-15	2.44e-14
cg15495417	1	212800089	FAM71A		0.766284	0.445546	0.320738	3.16874e-18	4.96165e-16		cg24856673	12	2017134	CACNA2D4	chr12:2017133-2018161	0.613059	0.259942	0.353117	1.92863e-09	2.71673e-07		cg05671070	10	8095960	FLJ45983;GATA3	chr10:8091374-8098329	0.400196	0.104319	0.295877	2.86669e-10	6.82413e-09		EPB41L1|2036	-1.16022	6.70391	2.64855e-26	4.46106e-25		GALNT9|50614	2.2276	0.261255	8.78e-07	6.05e-06		DGKB|1607	-3.42512	0.563997	3.54e-17	4.7e-16
[truncated: 10,694 more rows]

## Sheet: TableS3
high-low vs.high-high clinical comparision						low-high vs.high-high clinical comparision
[truncated: 43 more rows]

[truncated: 7 more sheets: TableS4, TableS5, TableS6, TableS7, TableS8, TableS9, TableS10]
